# Supplementary material for: Receiver Operating Characteristic Curve Analysis-Based Evaluation of GCMs Concerning Atmospheric Teleconnections
Source: MDPI journal article supplement (doi:10.3390/atmos12101236), 2021-09-22
Supplement: s1 [file s1]

# Supplementary Materials: Receiver Operating Characteristic Curve Analysis-Based Evaluation of GCMs concerning Atmospheric Teleconnections

Erzsébet Kristóf, Roland Hollós, Zoltán Barcza, Rita Pongrácz and Judit Bartholy

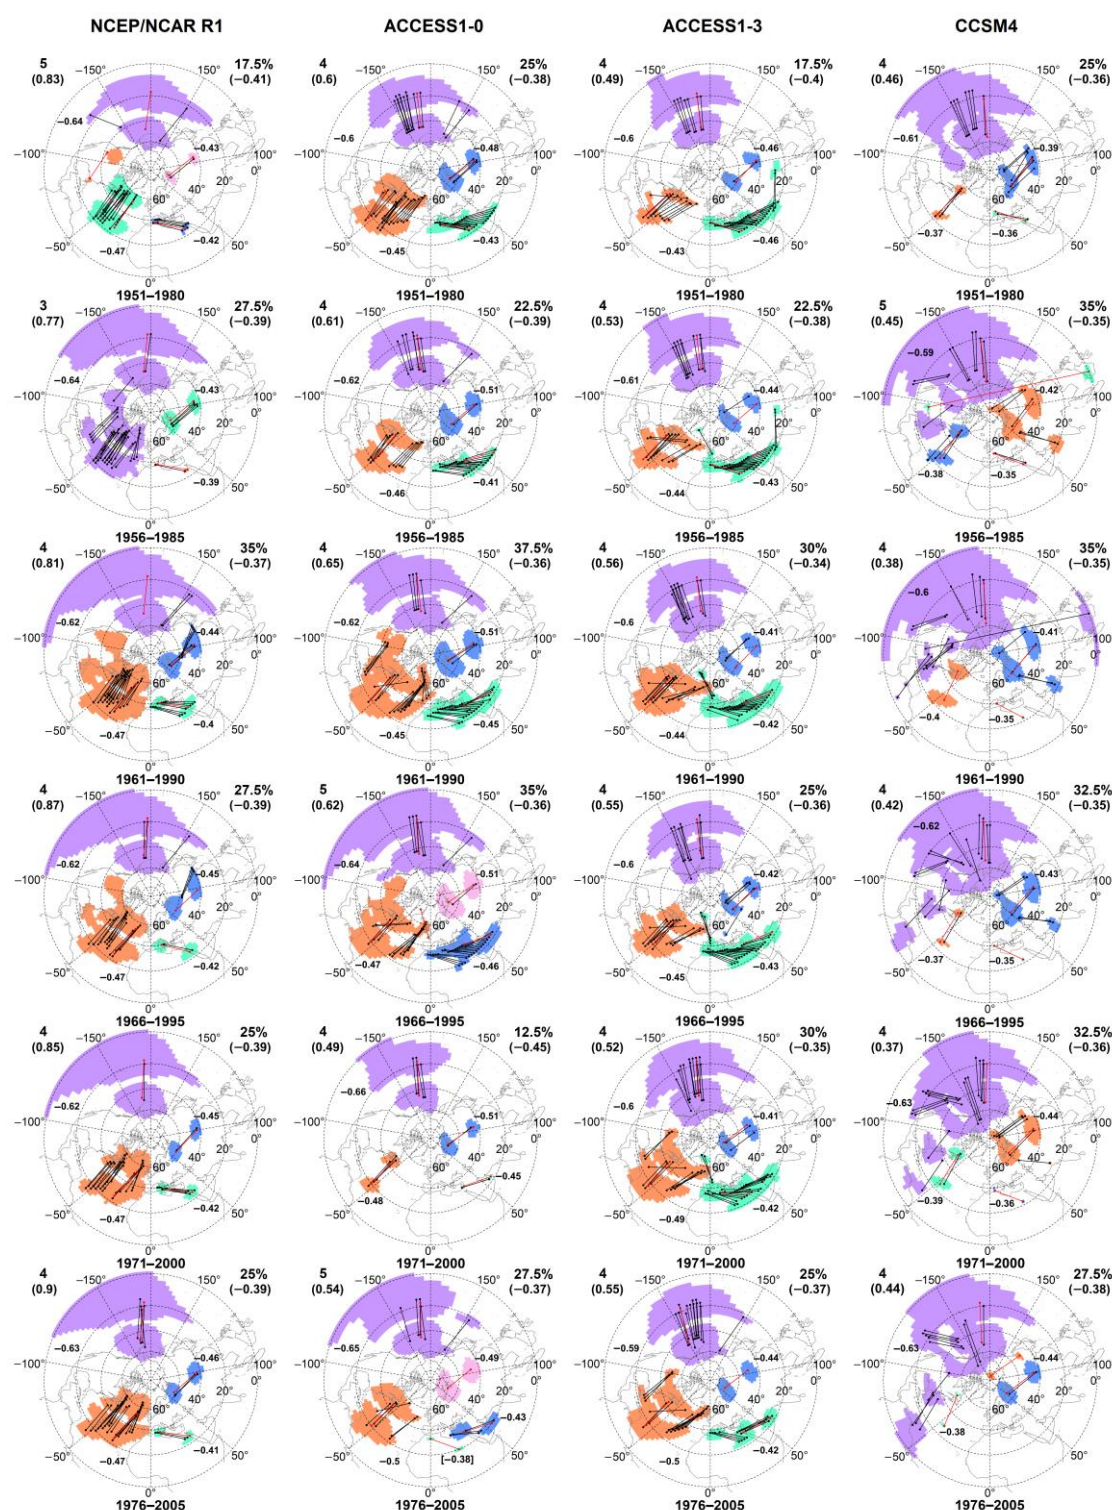

**Figure S1.** The maps of the cluster patterns (CP maps) obtained from the NCEP/NCAR R1 and the CMIP5 GCMs (in alphabetical order) which are considered as the most similar to the reference CPs. Each cluster is denoted with a different color. The pairs of the potential action centers (PotACs) are denoted with black dots connected with black lines. The PotAC with the most intense strongest negative correlation (SNC) is considered to be the action center (AC) of the teleconnection, and it is highlighted with red. The number of clusters can be found in the top-left corner of each map. The percentiles of all SNCs and their values (below which the SNCs are taken into account to create every CP) are shown in the top-right corner of each map. (These values are available for all CP maps in Table S1 of the Supplementary Material.) The  $MCC_{max}$  values corresponding to the maps are below the number of clusters. (Data are available in Table S5 of the Supplementary Material.) Correlations associated with the ACs are texted near the clusters. Texts without brackets denote clusters that correspond to the reference clusters PAC, ATL, MED, and ASIA in counterclockwise order. (Geographical coordinates of the ACs of these clusters can be found in Table S6 in the Supplementary Material.) Texts in square brackets imply clusters that are the closest to the reference clusters if those are not the most frequent clusters. Texts in round brackets denote other clusters in which the ACs are associated with a correlation stronger than  $-0.35$ .



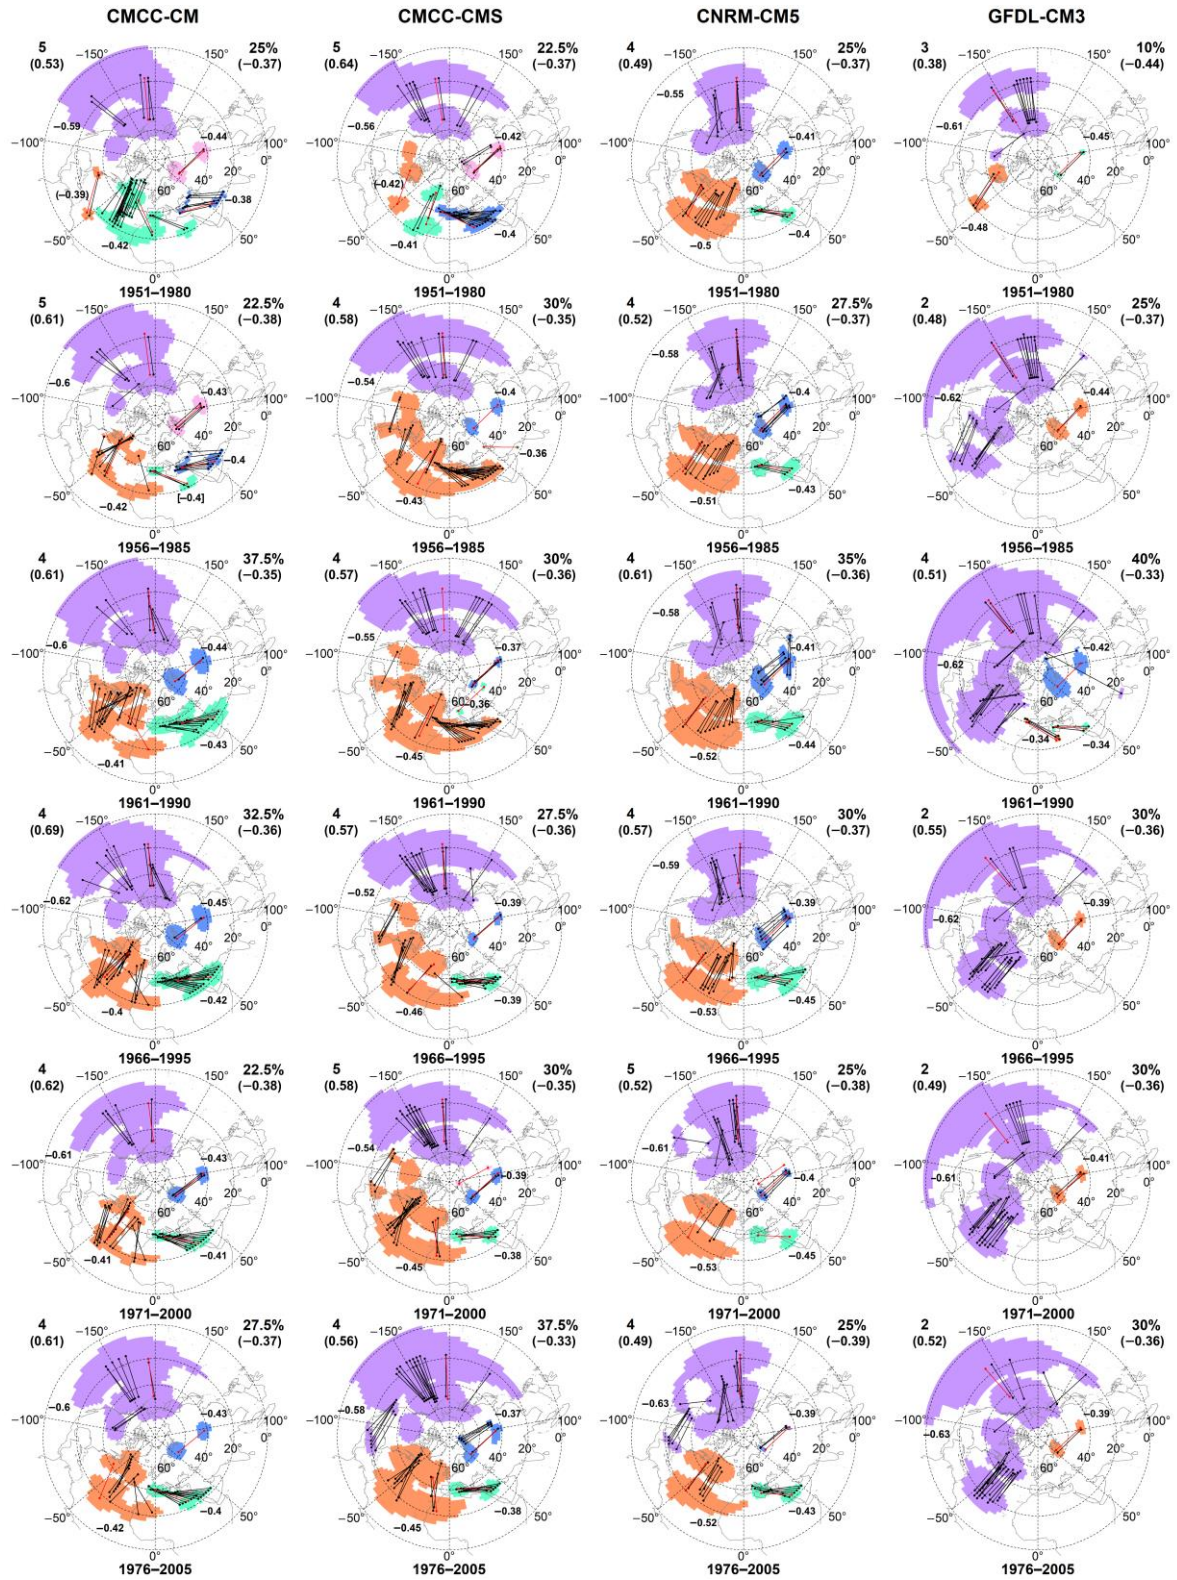

Figure S1 continued.



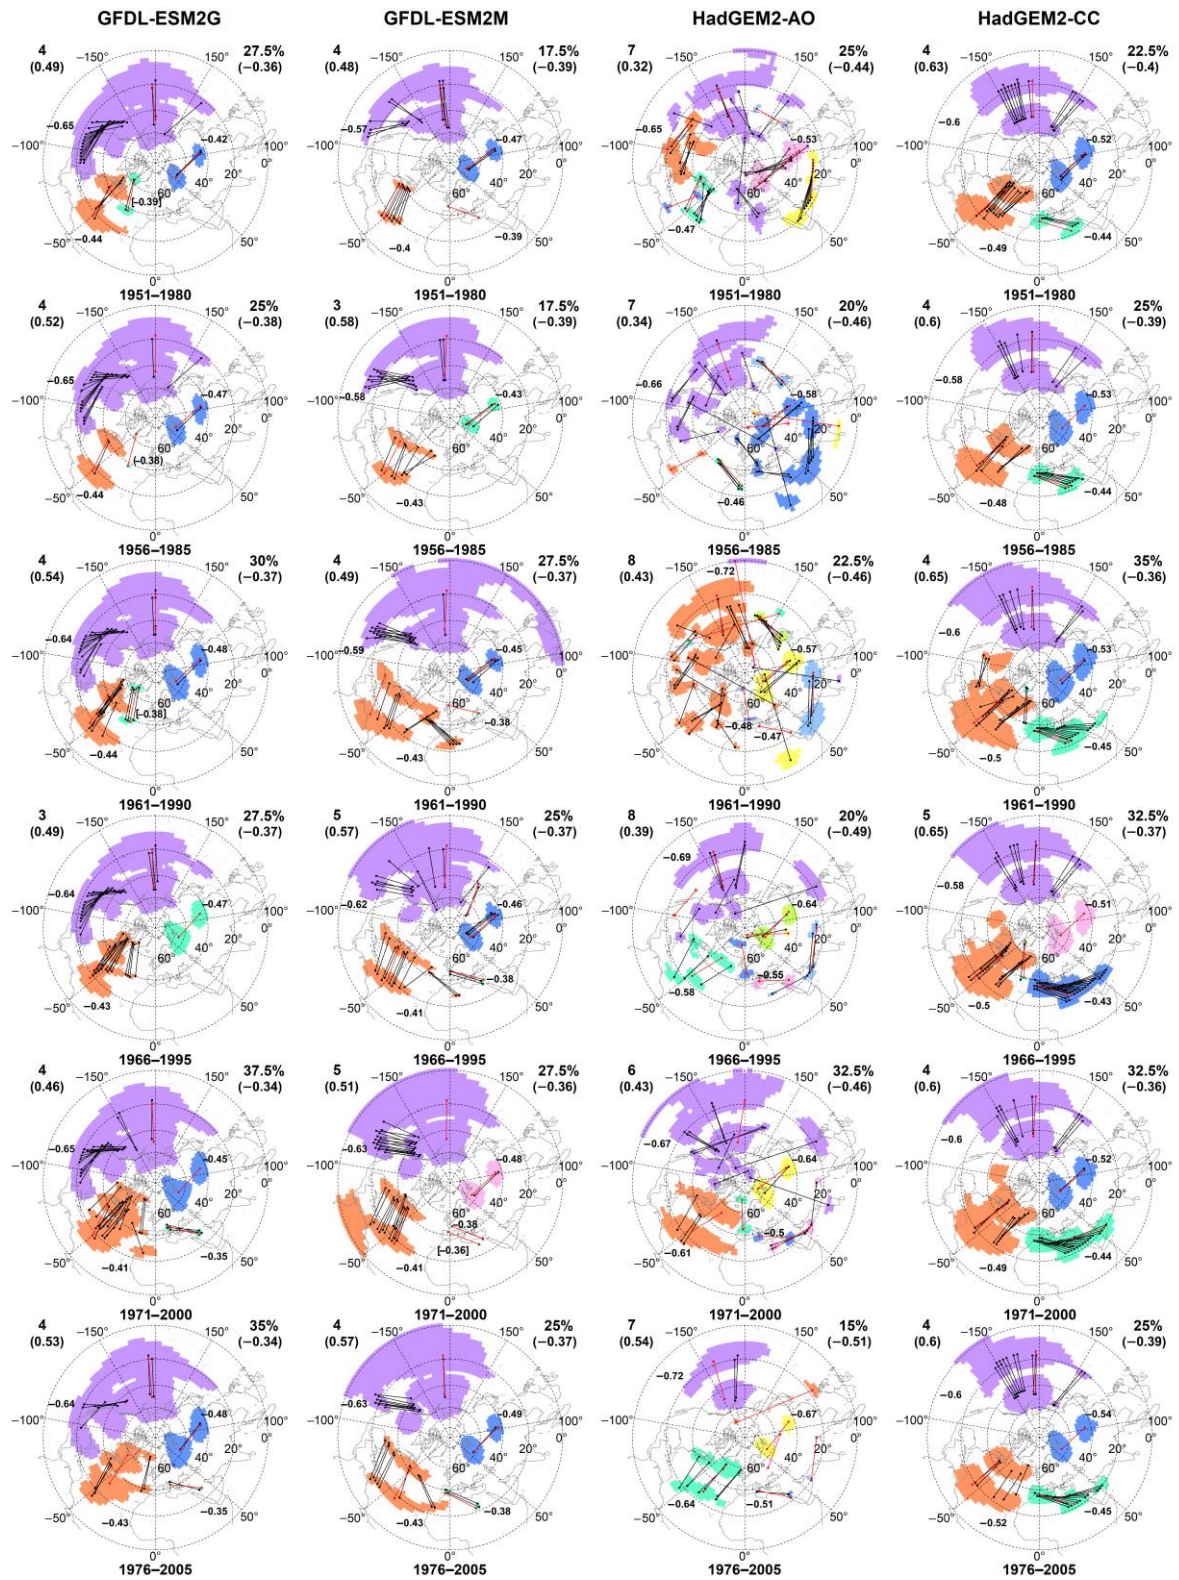

Figure S1 continued.



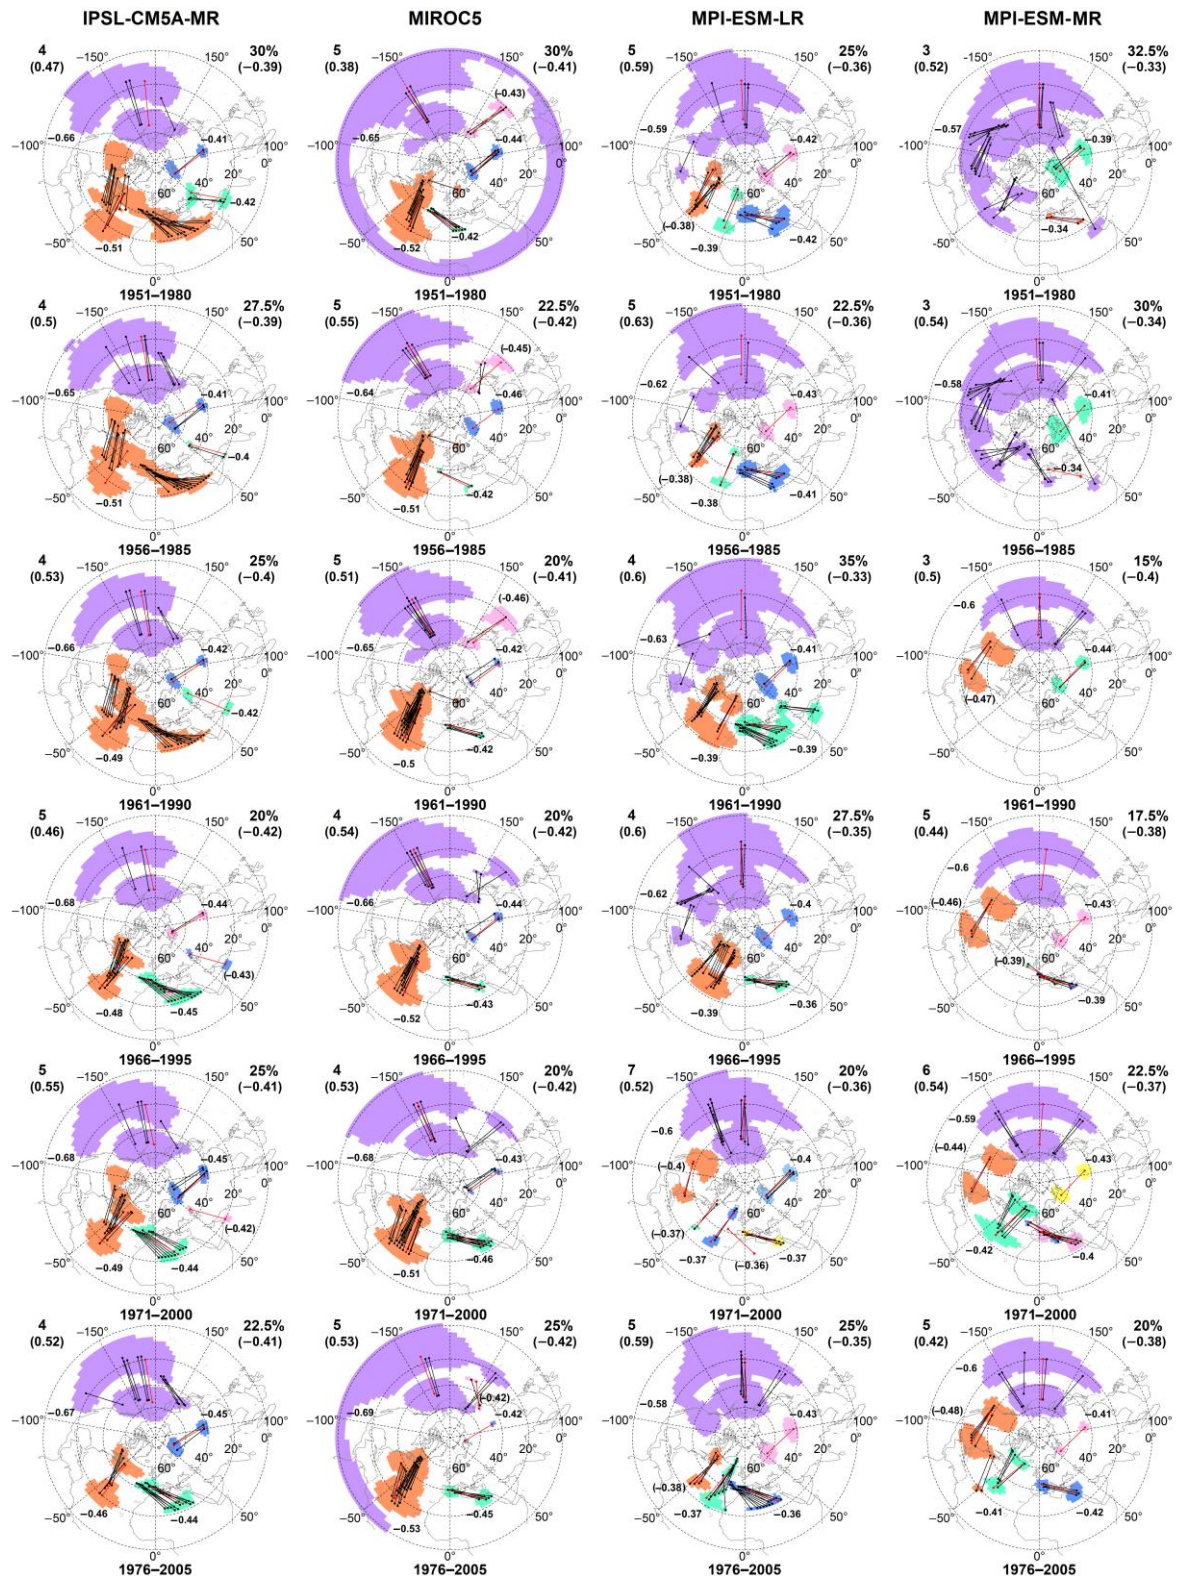

Figure S1 continued.



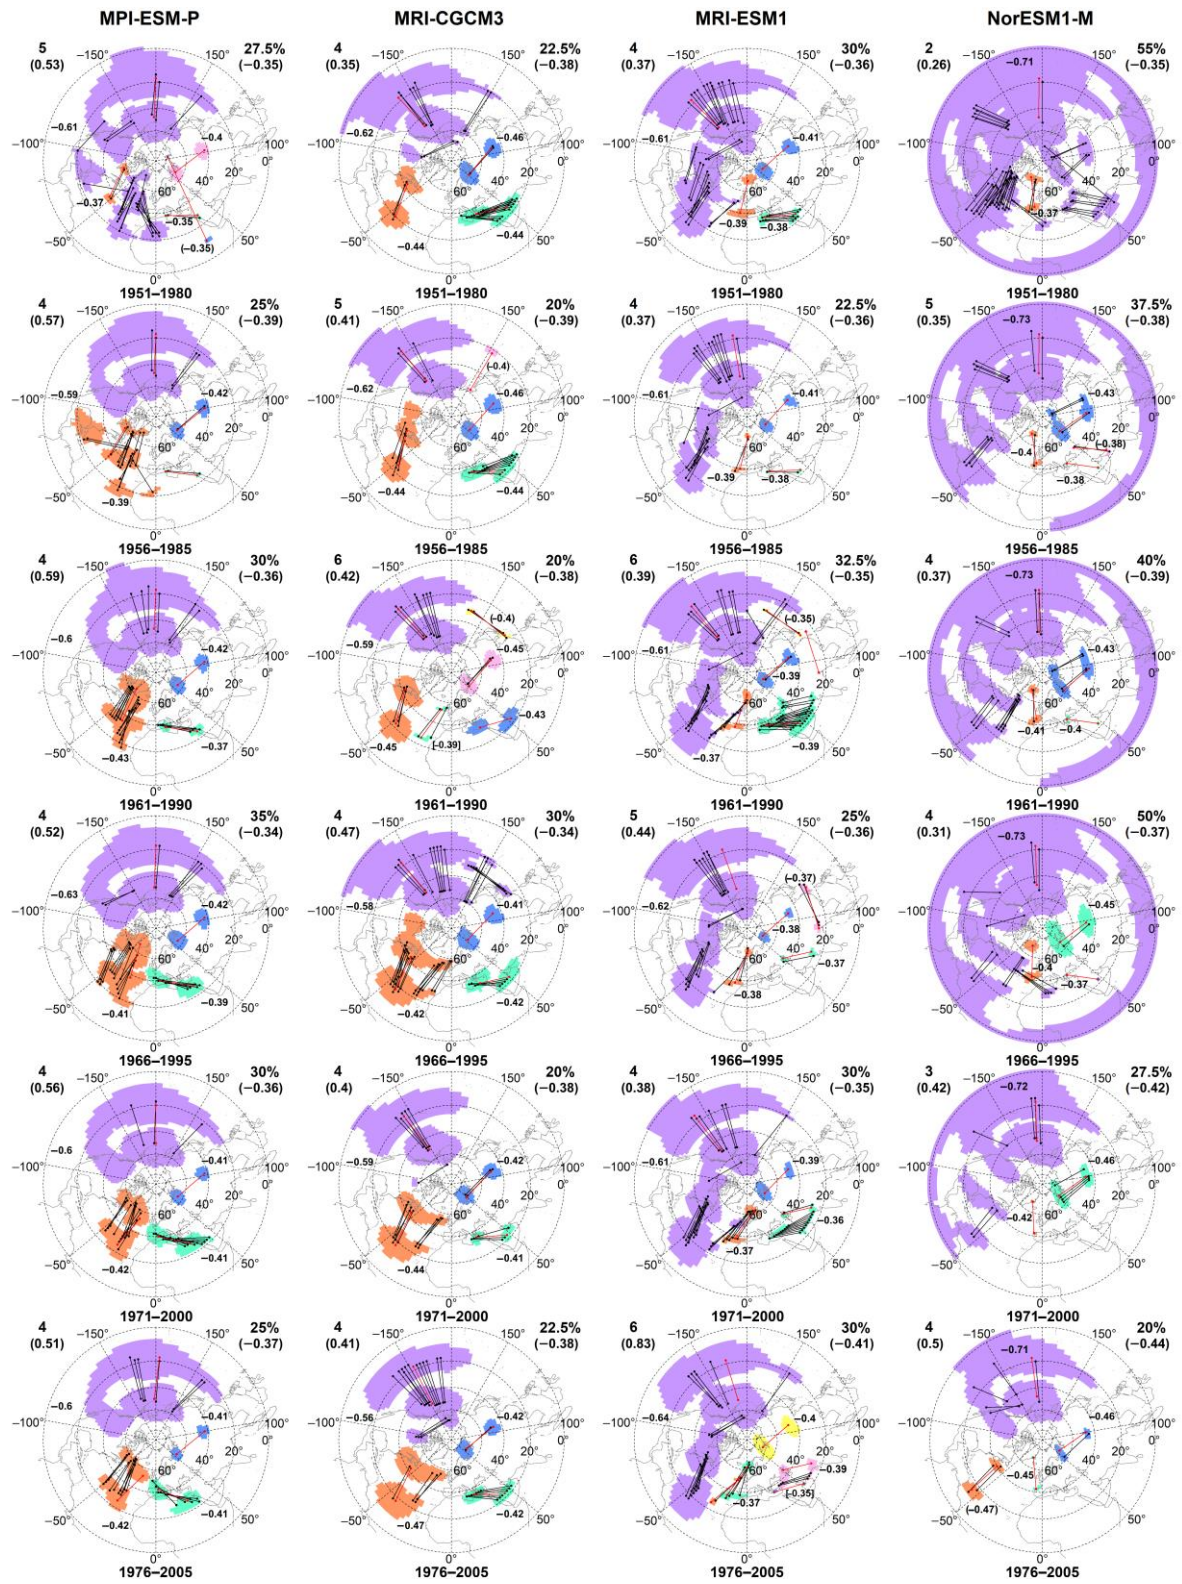

Figure S1 continued.

**Table S1.** Percentile values of the SNCs below which correlations are taken into account to create CP maps. The minus sign in front of the numbers is omitted. Numbers in the 2<sup>nd</sup> column indicate the analyzed periods. 1: 1951–1980, 2: 1956–1985, 3: 1961–1990, 4: 1966–1995, 5: 1971–2000, 6: 1976–2005. For the better visualization, in Tables S2–S5 of the Supplementary Material, straight lines separate the data of the reanalyses and the GCMs.

|              |   | min  | 2.5  | 5    | 7.5  | 10   | 12.5 | 15   | 17.5 | 20   | 22.5 | 25   | 27.5 | 30   | 32.5 | 35   | 37.5 | 40   | 42.5 | 45   | 47.5 | 50   | 52.5 | 55   | 57.5 | 60   | 62.5 | 65   | 67.5 | 70   | 75   | 80   | 85   | 90   | 95   | max  |
|--------------|---|------|------|------|------|------|------|------|------|------|------|------|------|------|------|------|------|------|------|------|------|------|------|------|------|------|------|------|------|------|------|------|------|------|------|------|
| ERA-20C      | 1 | 0.65 | 0.54 | 0.49 | 0.46 | 0.45 | 0.44 | 0.43 | 0.42 | 0.41 | 0.40 | 0.39 | 0.39 | 0.38 | 0.38 | 0.37 | 0.36 | 0.36 | 0.35 | 0.35 | 0.34 | 0.34 | 0.33 | 0.33 | 0.32 | 0.32 | 0.31 | 0.31 | 0.30 | 0.30 | 0.29 | 0.27 | 0.27 | 0.25 | 0.23 | 0.17 |
|              | 2 | 0.66 | 0.56 | 0.49 | 0.47 | 0.45 | 0.44 | 0.43 | 0.42 | 0.41 | 0.41 | 0.40 | 0.39 | 0.39 | 0.38 | 0.37 | 0.37 | 0.36 | 0.36 | 0.35 | 0.34 | 0.34 | 0.33 | 0.33 | 0.32 | 0.32 | 0.31 | 0.31 | 0.30 | 0.30 | 0.28 | 0.27 | 0.26 | 0.25 | 0.23 | 0.17 |
|              | 3 | 0.63 | 0.53 | 0.48 | 0.47 | 0.45 | 0.44 | 0.43 | 0.42 | 0.41 | 0.40 | 0.40 | 0.39 | 0.38 | 0.38 | 0.37 | 0.36 | 0.36 | 0.35 | 0.35 | 0.34 | 0.33 | 0.33 | 0.32 | 0.31 | 0.31 | 0.30 | 0.30 | 0.29 | 0.28 | 0.27 | 0.26 | 0.26 | 0.25 | 0.23 | 0.16 |
|              | 4 | 0.63 | 0.54 | 0.49 | 0.46 | 0.45 | 0.43 | 0.42 | 0.41 | 0.41 | 0.40 | 0.39 | 0.38 | 0.38 | 0.37 | 0.36 | 0.36 | 0.35 | 0.34 | 0.34 | 0.33 | 0.32 | 0.32 | 0.31 | 0.31 | 0.30 | 0.29 | 0.29 | 0.28 | 0.28 | 0.27 | 0.26 | 0.25 | 0.24 | 0.22 | 0.14 |
|              | 5 | 0.62 | 0.54 | 0.48 | 0.46 | 0.44 | 0.43 | 0.42 | 0.42 | 0.41 | 0.40 | 0.39 | 0.38 | 0.38 | 0.37 | 0.36 | 0.35 | 0.35 | 0.34 | 0.33 | 0.33 | 0.32 | 0.31 | 0.31 | 0.30 | 0.30 | 0.29 | 0.29 | 0.28 | 0.28 | 0.27 | 0.26 | 0.25 | 0.24 | 0.22 | 0.14 |
|              | 6 | 0.64 | 0.55 | 0.49 | 0.46 | 0.45 | 0.43 | 0.43 | 0.42 | 0.41 | 0.40 | 0.39 | 0.39 | 0.38 | 0.37 | 0.36 | 0.35 | 0.35 | 0.34 | 0.33 | 0.32 | 0.32 | 0.31 | 0.31 | 0.30 | 0.30 | 0.29 | 0.29 | 0.28 | 0.27 | 0.26 | 0.25 | 0.24 | 0.24 | 0.22 | 0.17 |
| NCEP/NCAR R1 | 1 | 0.64 | 0.54 | 0.49 | 0.46 | 0.44 | 0.43 | 0.42 | 0.41 | 0.40 | 0.40 | 0.39 | 0.38 | 0.38 | 0.37 | 0.37 | 0.36 | 0.36 | 0.35 | 0.35 | 0.34 | 0.33 | 0.33 | 0.32 | 0.31 | 0.31 | 0.30 | 0.30 | 0.29 | 0.28 | 0.27 | 0.26 | 0.25 | 0.24 | 0.22 | 0.17 |
|              | 2 | 0.64 | 0.55 | 0.49 | 0.46 | 0.44 | 0.43 | 0.42 | 0.42 | 0.41 | 0.40 | 0.39 | 0.39 | 0.38 | 0.38 | 0.37 | 0.36 | 0.36 | 0.35 | 0.35 | 0.34 | 0.33 | 0.33 | 0.32 | 0.32 | 0.31 | 0.31 | 0.30 | 0.30 | 0.29 | 0.28 | 0.26 | 0.25 | 0.24 | 0.22 | 0.16 |
|              | 3 | 0.62 | 0.53 | 0.48 | 0.46 | 0.44 | 0.43 | 0.43 | 0.42 | 0.41 | 0.40 | 0.40 | 0.39 | 0.38 | 0.38 | 0.37 | 0.36 | 0.36 | 0.35 | 0.34 | 0.34 | 0.33 | 0.33 | 0.32 | 0.32 | 0.31 | 0.30 | 0.30 | 0.29 | 0.28 | 0.27 | 0.26 | 0.25 | 0.24 | 0.23 | 0.17 |
|              | 4 | 0.62 | 0.54 | 0.48 | 0.45 | 0.44 | 0.43 | 0.42 | 0.42 | 0.41 | 0.40 | 0.39 | 0.39 | 0.38 | 0.37 | 0.37 | 0.36 | 0.35 | 0.34 | 0.34 | 0.33 | 0.32 | 0.32 | 0.31 | 0.30 | 0.30 | 0.29 | 0.28 | 0.28 | 0.28 | 0.27 | 0.26 | 0.24 | 0.23 | 0.23 | 0.15 |
|              | 5 | 0.62 | 0.55 | 0.49 | 0.46 | 0.44 | 0.44 | 0.43 | 0.42 | 0.41 | 0.40 | 0.39 | 0.39 | 0.38 | 0.37 | 0.36 | 0.36 | 0.35 | 0.34 | 0.33 | 0.33 | 0.32 | 0.31 | 0.31 | 0.30 | 0.30 | 0.29 | 0.29 | 0.28 | 0.28 | 0.27 | 0.25 | 0.24 | 0.23 | 0.22 | 0.14 |
|              | 6 | 0.63 | 0.56 | 0.49 | 0.46 | 0.45 | 0.44 | 0.43 | 0.42 | 0.41 | 0.40 | 0.39 | 0.39 | 0.38 | 0.37 | 0.36 | 0.35 | 0.35 | 0.34 | 0.33 | 0.32 | 0.32 | 0.31 | 0.30 | 0.30 | 0.29 | 0.29 | 0.28 | 0.28 | 0.27 | 0.26 | 0.25 | 0.24 | 0.22 | 0.21 | 0.16 |
| ACCESS1-0    | 1 | 0.60 | 0.54 | 0.48 | 0.45 | 0.44 | 0.43 | 0.42 | 0.41 | 0.40 | 0.39 | 0.38 | 0.37 | 0.37 | 0.36 | 0.35 | 0.35 | 0.34 | 0.33 | 0.33 | 0.32 | 0.31 | 0.31 | 0.30 | 0.29 | 0.28 | 0.28 | 0.27 | 0.27 | 0.26 | 0.25 | 0.24 | 0.23 | 0.21 | 0.20 | 0.15 |
|              | 2 | 0.62 | 0.55 | 0.49 | 0.46 | 0.44 | 0.43 | 0.41 | 0.40 | 0.40 | 0.39 | 0.38 | 0.37 | 0.37 | 0.36 | 0.36 | 0.35 | 0.35 | 0.34 | 0.33 | 0.33 | 0.32 | 0.31 | 0.31 | 0.30 | 0.29 | 0.29 | 0.28 | 0.28 | 0.27 | 0.26 | 0.25 | 0.25 | 0.22 | 0.21 | 0.15 |
|              | 3 | 0.62 | 0.54 | 0.50 | 0.47 | 0.45 | 0.43 | 0.42 | 0.41 | 0.40 | 0.40 | 0.39 | 0.38 | 0.38 | 0.37 | 0.36 | 0.36 | 0.35 | 0.35 | 0.34 | 0.33 | 0.33 | 0.32 | 0.32 | 0.31 | 0.30 | 0.30 | 0.29 | 0.29 | 0.29 | 0.28 | 0.26 | 0.25 | 0.24 | 0.23 | 0.15 |
|              | 4 | 0.64 | 0.57 | 0.50 | 0.48 | 0.46 | 0.44 | 0.43 | 0.42 | 0.41 | 0.40 | 0.39 | 0.38 | 0.38 | 0.37 | 0.36 | 0.36 | 0.35 | 0.35 | 0.34 | 0.34 | 0.33 | 0.33 | 0.32 | 0.32 | 0.31 | 0.30 | 0.30 | 0.29 | 0.29 | 0.28 | 0.27 | 0.26 | 0.24 | 0.23 | 0.15 |
|              | 5 | 0.66 | 0.58 | 0.51 | 0.48 | 0.46 | 0.45 | 0.44 | 0.42 | 0.41 | 0.40 | 0.39 | 0.39 | 0.38 | 0.37 | 0.37 | 0.36 | 0.36 | 0.35 | 0.35 | 0.34 | 0.34 | 0.33 | 0.33 | 0.33 | 0.32 | 0.31 | 0.31 | 0.30 | 0.30 | 0.29 | 0.28 | 0.26 | 0.25 | 0.22 | 0.15 |
|              | 6 | 0.65 | 0.56 | 0.49 | 0.47 | 0.45 | 0.44 | 0.42 | 0.41 | 0.40 | 0.39 | 0.38 | 0.37 | 0.37 | 0.36 | 0.36 | 0.35 | 0.35 | 0.34 | 0.34 | 0.33 | 0.33 | 0.32 | 0.32 | 0.31 | 0.31 | 0.30 | 0.30 | 0.29 | 0.28 | 0.27 | 0.27 | 0.25 | 0.24 | 0.22 | 0.15 |
| ACCESS1-3    | 1 | 0.60 | 0.55 | 0.50 | 0.45 | 0.43 | 0.42 | 0.41 | 0.40 | 0.39 | 0.38 | 0.38 | 0.37 | 0.36 | 0.35 | 0.35 | 0.34 | 0.33 | 0.33 | 0.32 | 0.31 | 0.31 | 0.30 | 0.29 | 0.29 | 0.28 | 0.28 | 0.27 | 0.26 | 0.26 | 0.25 | 0.24 | 0.23 | 0.21 | 0.19 | 0.13 |
|              | 2 | 0.61 | 0.55 | 0.49 | 0.44 | 0.42 | 0.41 | 0.40 | 0.39 | 0.39 | 0.38 | 0.37 | 0.36 | 0.35 | 0.35 | 0.34 | 0.33 | 0.33 | 0.32 | 0.31 | 0.31 | 0.30 | 0.29 | 0.29 | 0.28 | 0.27 | 0.27 | 0.27 | 0.26 | 0.26 | 0.25 | 0.23 | 0.22 | 0.21 | 0.19 | 0.13 |
|              | 3 | 0.60 | 0.55 | 0.49 | 0.44 | 0.42 | 0.41 | 0.39 | 0.39 | 0.38 | 0.37 | 0.36 | 0.35 | 0.34 | 0.34 | 0.33 | 0.32 | 0.32 | 0.31 | 0.30 | 0.30 | 0.29 | 0.29 | 0.28 | 0.27 | 0.27 | 0.26 | 0.25 | 0.25 | 0.24 | 0.23 | 0.22 | 0.21 | 0.20 | 0.18 | 0.13 |
|              | 4 | 0.60 | 0.54 | 0.49 | 0.44 | 0.42 | 0.41 | 0.40 | 0.39 | 0.38 | 0.37 | 0.36 | 0.35 | 0.35 | 0.34 | 0.33 | 0.33 | 0.32 | 0.31 | 0.30 | 0.30 | 0.29 | 0.28 | 0.28 | 0.27 | 0.26 | 0.25 | 0.25 | 0.24 | 0.23 | 0.22 | 0.21 | 0.21 | 0.20 | 0.18 | 0.13 |
|              | 5 | 0.60 | 0.55 | 0.49 | 0.46 | 0.43 | 0.41 | 0.40 | 0.39 | 0.39 | 0.38 | 0.37 | 0.36 | 0.35 | 0.35 | 0.34 | 0.33 | 0.33 | 0.32 | 0.31 | 0.31 | 0.30 | 0.29 | 0.29 | 0.28 | 0.28 | 0.27 | 0.26 | 0.26 | 0.25 | 0.24 | 0.22 | 0.21 | 0.20 | 0.19 | 0.13 |
|              | 6 | 0.59 | 0.55 | 0.49 | 0.45 | 0.43 | 0.41 | 0.40 | 0.39 | 0.38 | 0.38 | 0.37 | 0.36 | 0.36 | 0.35 | 0.34 | 0.34 | 0.33 | 0.32 | 0.32 | 0.31 | 0.30 | 0.29 | 0.29 | 0.28 | 0.28 | 0.27 | 0.27 | 0.26 | 0.25 | 0.24 | 0.23 | 0.22 | 0.22 | 0.19 | 0.13 |
| CCS          | 1 | 0.61 | 0.53 | 0.49 | 0.45 | 0.42 | 0.40 | 0.39 | 0.38 | 0.37 | 0.37 | 0.36 | 0.35 | 0.35 | 0.34 | 0.34 | 0.33 | 0.33 | 0.32 | 0.32 | 0.32 | 0.31 | 0.31 | 0.31 | 0.30 | 0.30 | 0.30 | 0.29 | 0.29 | 0.28 | 0.27 | 0.26 | 0.24 | 0.22 | 0.16 |      |
|              | 2 | 0.60 | 0.53 | 0.49 | 0.46 | 0.43 | 0.41 | 0.40 | 0.39 | 0.38 | 0.37 | 0.36 | 0.36 | 0.35 | 0.35 | 0.34 | 0.34 | 0.34 | 0.34 | 0.33 | 0.33 | 0.32 | 0.32 | 0.32 | 0.31 | 0.31 | 0.31 | 0.30 | 0.30 | 0.29 | 0.28 | 0.27 | 0.25 | 0.23 | 0.16 |      |

|          |   |      |      |      |      |      |      |      |      |      |      |      |      |      |      |      |      |      |      |      |      |      |      |      |      |      |      |      |      |      |      |      |      |      |      |      |
|----------|---|------|------|------|------|------|------|------|------|------|------|------|------|------|------|------|------|------|------|------|------|------|------|------|------|------|------|------|------|------|------|------|------|------|------|------|
|          | 3 | 0.60 | 0.53 | 0.50 | 0.47 | 0.44 | 0.42 | 0.41 | 0.39 | 0.38 | 0.38 | 0.37 | 0.37 | 0.36 | 0.36 | 0.35 | 0.35 | 0.34 | 0.34 | 0.34 | 0.34 | 0.33 | 0.33 | 0.33 | 0.32 | 0.32 | 0.32 | 0.31 | 0.31 | 0.30 | 0.29 | 0.28 | 0.27 | 0.25 | 0.23 | 0.16 |
|          | 4 | 0.62 | 0.55 | 0.49 | 0.45 | 0.44 | 0.42 | 0.41 | 0.40 | 0.39 | 0.38 | 0.37 | 0.36 | 0.36 | 0.35 | 0.35 | 0.34 | 0.34 | 0.33 | 0.33 | 0.33 | 0.33 | 0.32 | 0.32 | 0.31 | 0.31 | 0.30 | 0.30 | 0.29 | 0.28 | 0.27 | 0.26 | 0.24 | 0.22 | 0.17 |      |
|          | 5 | 0.63 | 0.56 | 0.49 | 0.46 | 0.44 | 0.42 | 0.41 | 0.40 | 0.39 | 0.38 | 0.37 | 0.37 | 0.36 | 0.36 | 0.36 | 0.35 | 0.35 | 0.35 | 0.34 | 0.34 | 0.33 | 0.33 | 0.32 | 0.32 | 0.31 | 0.31 | 0.30 | 0.30 | 0.29 | 0.28 | 0.27 | 0.26 | 0.24 | 0.23 | 0.17 |
|          | 6 | 0.63 | 0.56 | 0.49 | 0.45 | 0.44 | 0.42 | 0.41 | 0.40 | 0.39 | 0.38 | 0.38 | 0.38 | 0.37 | 0.37 | 0.37 | 0.36 | 0.36 | 0.36 | 0.35 | 0.35 | 0.34 | 0.34 | 0.33 | 0.32 | 0.32 | 0.31 | 0.31 | 0.30 | 0.30 | 0.29 | 0.28 | 0.27 | 0.25 | 0.23 | 0.17 |
| CMCC-CM  | 1 | 0.59 | 0.52 | 0.48 | 0.45 | 0.43 | 0.41 | 0.40 | 0.39 | 0.38 | 0.38 | 0.37 | 0.37 | 0.36 | 0.36 | 0.35 | 0.35 | 0.34 | 0.34 | 0.33 | 0.32 | 0.32 | 0.31 | 0.31 | 0.30 | 0.30 | 0.29 | 0.28 | 0.28 | 0.27 | 0.26 | 0.24 | 0.23 | 0.21 | 0.19 | 0.15 |
|          | 2 | 0.60 | 0.51 | 0.47 | 0.44 | 0.42 | 0.41 | 0.41 | 0.40 | 0.39 | 0.38 | 0.38 | 0.37 | 0.37 | 0.36 | 0.36 | 0.35 | 0.34 | 0.34 | 0.33 | 0.32 | 0.32 | 0.31 | 0.30 | 0.30 | 0.29 | 0.29 | 0.28 | 0.27 | 0.27 | 0.26 | 0.25 | 0.23 | 0.22 | 0.21 | 0.16 |
|          | 3 | 0.60 | 0.51 | 0.47 | 0.44 | 0.43 | 0.41 | 0.40 | 0.39 | 0.38 | 0.38 | 0.37 | 0.37 | 0.36 | 0.36 | 0.35 | 0.35 | 0.34 | 0.34 | 0.33 | 0.32 | 0.32 | 0.31 | 0.30 | 0.30 | 0.29 | 0.29 | 0.28 | 0.27 | 0.27 | 0.26 | 0.25 | 0.23 | 0.22 | 0.20 | 0.16 |
|          | 4 | 0.62 | 0.53 | 0.48 | 0.45 | 0.43 | 0.41 | 0.40 | 0.40 | 0.39 | 0.38 | 0.38 | 0.37 | 0.37 | 0.36 | 0.36 | 0.35 | 0.34 | 0.34 | 0.33 | 0.32 | 0.32 | 0.31 | 0.30 | 0.30 | 0.29 | 0.29 | 0.28 | 0.28 | 0.27 | 0.26 | 0.24 | 0.23 | 0.22 | 0.20 | 0.14 |
|          | 5 | 0.61 | 0.51 | 0.47 | 0.44 | 0.42 | 0.41 | 0.40 | 0.40 | 0.39 | 0.39 | 0.38 | 0.37 | 0.37 | 0.36 | 0.36 | 0.35 | 0.35 | 0.34 | 0.33 | 0.33 | 0.32 | 0.31 | 0.31 | 0.30 | 0.30 | 0.29 | 0.28 | 0.28 | 0.27 | 0.26 | 0.25 | 0.23 | 0.22 | 0.21 | 0.14 |
|          | 6 | 0.60 | 0.52 | 0.48 | 0.45 | 0.43 | 0.41 | 0.40 | 0.40 | 0.39 | 0.39 | 0.38 | 0.38 | 0.37 | 0.36 | 0.36 | 0.35 | 0.34 | 0.34 | 0.33 | 0.32 | 0.32 | 0.31 | 0.31 | 0.30 | 0.29 | 0.29 | 0.28 | 0.27 | 0.26 | 0.25 | 0.24 | 0.22 | 0.21 | 0.19 | 0.16 |
| CMCC-CMS | 1 | 0.56 | 0.50 | 0.45 | 0.43 | 0.41 | 0.40 | 0.39 | 0.38 | 0.38 | 0.37 | 0.37 | 0.36 | 0.35 | 0.35 | 0.34 | 0.34 | 0.33 | 0.33 | 0.32 | 0.32 | 0.31 | 0.31 | 0.30 | 0.30 | 0.29 | 0.29 | 0.28 | 0.28 | 0.27 | 0.27 | 0.26 | 0.25 | 0.23 | 0.22 | 0.16 |
|          | 2 | 0.55 | 0.51 | 0.47 | 0.44 | 0.42 | 0.41 | 0.40 | 0.39 | 0.38 | 0.38 | 0.37 | 0.36 | 0.35 | 0.35 | 0.34 | 0.34 | 0.34 | 0.33 | 0.33 | 0.32 | 0.31 | 0.31 | 0.30 | 0.30 | 0.29 | 0.29 | 0.29 | 0.29 | 0.28 | 0.27 | 0.26 | 0.25 | 0.24 | 0.22 | 0.16 |
|          | 3 | 0.55 | 0.49 | 0.46 | 0.44 | 0.42 | 0.41 | 0.40 | 0.39 | 0.38 | 0.38 | 0.37 | 0.36 | 0.36 | 0.35 | 0.34 | 0.34 | 0.33 | 0.33 | 0.32 | 0.32 | 0.32 | 0.31 | 0.31 | 0.30 | 0.30 | 0.29 | 0.29 | 0.28 | 0.28 | 0.27 | 0.26 | 0.25 | 0.24 | 0.22 | 0.16 |
|          | 4 | 0.52 | 0.48 | 0.45 | 0.43 | 0.42 | 0.41 | 0.39 | 0.39 | 0.38 | 0.37 | 0.37 | 0.36 | 0.35 | 0.35 | 0.34 | 0.34 | 0.33 | 0.33 | 0.32 | 0.32 | 0.31 | 0.31 | 0.30 | 0.30 | 0.29 | 0.29 | 0.29 | 0.28 | 0.28 | 0.27 | 0.26 | 0.25 | 0.24 | 0.23 | 0.17 |
|          | 5 | 0.54 | 0.49 | 0.46 | 0.43 | 0.42 | 0.41 | 0.40 | 0.39 | 0.38 | 0.37 | 0.37 | 0.36 | 0.35 | 0.35 | 0.34 | 0.34 | 0.33 | 0.32 | 0.32 | 0.31 | 0.31 | 0.30 | 0.30 | 0.29 | 0.29 | 0.29 | 0.28 | 0.27 | 0.27 | 0.26 | 0.25 | 0.24 | 0.23 | 0.22 | 0.18 |
|          | 6 | 0.58 | 0.53 | 0.50 | 0.46 | 0.44 | 0.43 | 0.41 | 0.40 | 0.39 | 0.38 | 0.37 | 0.36 | 0.35 | 0.35 | 0.34 | 0.33 | 0.33 | 0.32 | 0.32 | 0.31 | 0.31 | 0.30 | 0.29 | 0.29 | 0.28 | 0.28 | 0.27 | 0.27 | 0.26 | 0.25 | 0.25 | 0.24 | 0.23 | 0.22 | 0.16 |
| CNRM-CM5 | 1 | 0.55 | 0.50 | 0.48 | 0.46 | 0.44 | 0.43 | 0.41 | 0.40 | 0.39 | 0.38 | 0.37 | 0.36 | 0.36 | 0.35 | 0.34 | 0.34 | 0.33 | 0.33 | 0.32 | 0.31 | 0.31 | 0.30 | 0.30 | 0.29 | 0.28 | 0.27 | 0.27 | 0.26 | 0.26 | 0.24 | 0.23 | 0.22 | 0.21 | 0.19 | 0.13 |
|          | 2 | 0.58 | 0.52 | 0.49 | 0.47 | 0.45 | 0.44 | 0.42 | 0.41 | 0.40 | 0.39 | 0.38 | 0.37 | 0.37 | 0.36 | 0.35 | 0.35 | 0.34 | 0.34 | 0.33 | 0.32 | 0.32 | 0.31 | 0.31 | 0.30 | 0.30 | 0.29 | 0.28 | 0.28 | 0.27 | 0.26 | 0.24 | 0.23 | 0.23 | 0.21 | 0.14 |
|          | 3 | 0.58 | 0.52 | 0.49 | 0.47 | 0.45 | 0.44 | 0.42 | 0.41 | 0.40 | 0.39 | 0.39 | 0.38 | 0.37 | 0.36 | 0.36 | 0.35 | 0.35 | 0.34 | 0.33 | 0.32 | 0.32 | 0.31 | 0.30 | 0.30 | 0.29 | 0.29 | 0.28 | 0.28 | 0.27 | 0.26 | 0.24 | 0.23 | 0.22 | 0.19 | 0.14 |
|          | 4 | 0.59 | 0.52 | 0.49 | 0.48 | 0.46 | 0.45 | 0.44 | 0.42 | 0.40 | 0.39 | 0.38 | 0.37 | 0.37 | 0.36 | 0.35 | 0.35 | 0.34 | 0.34 | 0.33 | 0.32 | 0.32 | 0.31 | 0.31 | 0.30 | 0.29 | 0.29 | 0.28 | 0.27 | 0.27 | 0.26 | 0.25 | 0.24 | 0.22 | 0.20 | 0.15 |
|          | 5 | 0.61 | 0.55 | 0.51 | 0.49 | 0.47 | 0.45 | 0.44 | 0.42 | 0.40 | 0.39 | 0.38 | 0.38 | 0.37 | 0.36 | 0.35 | 0.35 | 0.34 | 0.34 | 0.33 | 0.32 | 0.32 | 0.31 | 0.31 | 0.30 | 0.30 | 0.29 | 0.28 | 0.28 | 0.27 | 0.26 | 0.25 | 0.24 | 0.23 | 0.20 | 0.12 |
|          | 6 | 0.64 | 0.55 | 0.51 | 0.49 | 0.48 | 0.46 | 0.44 | 0.43 | 0.41 | 0.40 | 0.39 | 0.38 | 0.38 | 0.37 | 0.36 | 0.35 | 0.35 | 0.34 | 0.33 | 0.33 | 0.32 | 0.32 | 0.31 | 0.31 | 0.30 | 0.30 | 0.29 | 0.28 | 0.28 | 0.27 | 0.26 | 0.24 | 0.23 | 0.21 | 0.14 |
| GFDL-CM3 | 1 | 0.61 | 0.53 | 0.49 | 0.46 | 0.44 | 0.43 | 0.42 | 0.40 | 0.39 | 0.38 | 0.38 | 0.37 | 0.36 | 0.36 | 0.35 | 0.35 | 0.34 | 0.33 | 0.33 | 0.33 | 0.32 | 0.32 | 0.31 | 0.31 | 0.30 | 0.30 | 0.29 | 0.29 | 0.28 | 0.27 | 0.27 | 0.26 | 0.24 | 0.23 | 0.15 |
|          | 2 | 0.62 | 0.53 | 0.49 | 0.46 | 0.44 | 0.43 | 0.42 | 0.41 | 0.39 | 0.38 | 0.38 | 0.37 | 0.36 | 0.36 | 0.35 | 0.35 | 0.34 | 0.34 | 0.33 | 0.33 | 0.32 | 0.32 | 0.31 | 0.31 | 0.30 | 0.30 | 0.29 | 0.29 | 0.28 | 0.27 | 0.26 | 0.25 | 0.24 | 0.22 | 0.15 |
|          | 3 | 0.62 | 0.53 | 0.50 | 0.47 | 0.45 | 0.44 | 0.42 | 0.41 | 0.40 | 0.39 | 0.38 | 0.37 | 0.36 | 0.35 | 0.34 | 0.34 | 0.33 | 0.33 | 0.32 | 0.32 | 0.31 | 0.31 | 0.31 | 0.30 | 0.30 | 0.29 | 0.29 | 0.28 | 0.28 | 0.27 | 0.27 | 0.25 | 0.24 | 0.22 | 0.16 |
|          | 4 | 0.62 | 0.55 | 0.50 | 0.47 | 0.45 | 0.43 | 0.42 | 0.40 | 0.39 | 0.38 | 0.37 | 0.36 | 0.36 | 0.35 | 0.34 | 0.33 | 0.33 | 0.33 | 0.32 | 0.32 | 0.31 | 0.31 | 0.30 | 0.30 | 0.29 | 0.29 | 0.28 | 0.28 | 0.27 | 0.27 | 0.26 | 0.24 | 0.23 | 0.17 |      |
|          | 5 | 0.61 | 0.54 | 0.49 | 0.47 | 0.45 | 0.44 | 0.42 | 0.41 | 0.40 | 0.39 | 0.38 | 0.37 | 0.36 | 0.36 | 0.35 | 0.34 | 0.34 | 0.33 | 0.33 | 0.32 | 0.32 | 0.31 | 0.31 | 0.31 | 0.30 | 0.30 | 0.29 | 0.29 | 0.28 | 0.27 | 0.26 | 0.25 | 0.24 | 0.23 | 0.16 |
|          | 6 | 0.63 | 0.55 | 0.49 | 0.47 | 0.44 | 0.43 | 0.41 | 0.40 | 0.39 | 0.38 | 0.37 | 0.37 | 0.36 | 0.35 | 0.34 | 0.33 | 0.33 | 0.32 | 0.32 | 0.31 | 0.31 | 0.30 | 0.30 | 0.29 | 0.29 | 0.28 | 0.28 | 0.28 | 0.27 | 0.26 | 0.25 | 0.25 | 0.24 | 0.22 | 0.14 |



|              |   |      |      |      |      |      |      |      |      |      |      |      |      |      |      |      |      |      |      |      |      |      |      |      |      |      |      |      |      |      |      |      |      |      |      |      |
|--------------|---|------|------|------|------|------|------|------|------|------|------|------|------|------|------|------|------|------|------|------|------|------|------|------|------|------|------|------|------|------|------|------|------|------|------|------|
| GFDL-ESM2G   | 1 | 0.65 | 0.57 | 0.50 | 0.46 | 0.45 | 0.43 | 0.42 | 0.40 | 0.39 | 0.38 | 0.37 | 0.36 | 0.36 | 0.35 | 0.34 | 0.34 | 0.33 | 0.33 | 0.32 | 0.32 | 0.31 | 0.31 | 0.31 | 0.30 | 0.30 | 0.30 | 0.29 | 0.28 | 0.28 | 0.27 | 0.26 | 0.24 | 0.22 | 0.19 | 0.15 |
|              | 2 | 0.66 | 0.57 | 0.50 | 0.46 | 0.44 | 0.43 | 0.42 | 0.41 | 0.40 | 0.39 | 0.38 | 0.37 | 0.36 | 0.35 | 0.35 | 0.34 | 0.34 | 0.33 | 0.32 | 0.32 | 0.32 | 0.31 | 0.31 | 0.31 | 0.30 | 0.30 | 0.30 | 0.30 | 0.29 | 0.28 | 0.26 | 0.24 | 0.22 | 0.20 | 0.15 |
|              | 3 | 0.64 | 0.55 | 0.49 | 0.46 | 0.44 | 0.43 | 0.42 | 0.41 | 0.40 | 0.39 | 0.38 | 0.37 | 0.37 | 0.36 | 0.35 | 0.35 | 0.34 | 0.34 | 0.33 | 0.33 | 0.32 | 0.32 | 0.31 | 0.31 | 0.31 | 0.30 | 0.30 | 0.30 | 0.29 | 0.28 | 0.27 | 0.25 | 0.23 | 0.22 | 0.16 |
|              | 4 | 0.64 | 0.55 | 0.48 | 0.45 | 0.44 | 0.42 | 0.41 | 0.40 | 0.39 | 0.39 | 0.38 | 0.37 | 0.37 | 0.36 | 0.35 | 0.35 | 0.34 | 0.33 | 0.33 | 0.32 | 0.32 | 0.32 | 0.31 | 0.31 | 0.30 | 0.30 | 0.30 | 0.29 | 0.29 | 0.28 | 0.26 | 0.24 | 0.22 | 0.19 | 0.15 |
|              | 5 | 0.65 | 0.55 | 0.49 | 0.45 | 0.43 | 0.42 | 0.41 | 0.40 | 0.39 | 0.38 | 0.37 | 0.37 | 0.36 | 0.35 | 0.35 | 0.34 | 0.34 | 0.33 | 0.33 | 0.33 | 0.32 | 0.32 | 0.31 | 0.31 | 0.31 | 0.30 | 0.30 | 0.29 | 0.29 | 0.28 | 0.26 | 0.25 | 0.23 | 0.22 | 0.15 |
|              | 6 | 0.64 | 0.55 | 0.49 | 0.46 | 0.44 | 0.42 | 0.41 | 0.40 | 0.39 | 0.38 | 0.37 | 0.36 | 0.35 | 0.35 | 0.34 | 0.34 | 0.33 | 0.33 | 0.32 | 0.32 | 0.32 | 0.31 | 0.31 | 0.30 | 0.30 | 0.29 | 0.29 | 0.28 | 0.28 | 0.27 | 0.26 | 0.25 | 0.24 | 0.22 | 0.15 |
| GFDL-ESM2M   | 1 | 0.57 | 0.51 | 0.47 | 0.45 | 0.43 | 0.41 | 0.40 | 0.39 | 0.38 | 0.38 | 0.37 | 0.37 | 0.36 | 0.35 | 0.35 | 0.34 | 0.34 | 0.33 | 0.33 | 0.33 | 0.32 | 0.32 | 0.31 | 0.31 | 0.30 | 0.30 | 0.30 | 0.29 | 0.29 | 0.27 | 0.27 | 0.25 | 0.24 | 0.23 | 0.16 |
|              | 2 | 0.58 | 0.53 | 0.48 | 0.44 | 0.42 | 0.41 | 0.40 | 0.39 | 0.38 | 0.37 | 0.37 | 0.36 | 0.36 | 0.35 | 0.35 | 0.34 | 0.34 | 0.33 | 0.33 | 0.32 | 0.32 | 0.32 | 0.31 | 0.31 | 0.30 | 0.30 | 0.30 | 0.29 | 0.29 | 0.28 | 0.27 | 0.25 | 0.24 | 0.22 | 0.18 |
|              | 3 | 0.59 | 0.53 | 0.48 | 0.44 | 0.42 | 0.41 | 0.40 | 0.40 | 0.39 | 0.39 | 0.38 | 0.38 | 0.37 | 0.37 | 0.36 | 0.36 | 0.35 | 0.35 | 0.34 | 0.34 | 0.34 | 0.33 | 0.33 | 0.32 | 0.32 | 0.32 | 0.31 | 0.30 | 0.30 | 0.29 | 0.27 | 0.26 | 0.25 | 0.22 | 0.16 |
|              | 4 | 0.62 | 0.55 | 0.48 | 0.45 | 0.43 | 0.41 | 0.40 | 0.39 | 0.39 | 0.38 | 0.37 | 0.37 | 0.36 | 0.36 | 0.35 | 0.35 | 0.34 | 0.34 | 0.33 | 0.33 | 0.33 | 0.32 | 0.32 | 0.31 | 0.31 | 0.30 | 0.30 | 0.30 | 0.29 | 0.28 | 0.27 | 0.26 | 0.25 | 0.22 | 0.16 |
|              | 5 | 0.63 | 0.55 | 0.49 | 0.46 | 0.43 | 0.41 | 0.40 | 0.39 | 0.39 | 0.38 | 0.37 | 0.36 | 0.36 | 0.35 | 0.35 | 0.34 | 0.34 | 0.33 | 0.33 | 0.33 | 0.32 | 0.32 | 0.31 | 0.31 | 0.30 | 0.30 | 0.30 | 0.29 | 0.29 | 0.28 | 0.27 | 0.25 | 0.25 | 0.24 | 0.16 |
|              | 6 | 0.63 | 0.56 | 0.49 | 0.46 | 0.44 | 0.42 | 0.41 | 0.40 | 0.39 | 0.38 | 0.37 | 0.37 | 0.36 | 0.36 | 0.35 | 0.34 | 0.34 | 0.34 | 0.33 | 0.33 | 0.32 | 0.32 | 0.31 | 0.31 | 0.31 | 0.30 | 0.30 | 0.29 | 0.29 | 0.28 | 0.27 | 0.27 | 0.26 | 0.24 | 0.16 |
| HadGEM2-AO   | 1 | 0.65 | 0.54 | 0.51 | 0.49 | 0.48 | 0.47 | 0.47 | 0.46 | 0.45 | 0.45 | 0.44 | 0.44 | 0.44 | 0.43 | 0.43 | 0.42 | 0.42 | 0.42 | 0.41 | 0.41 | 0.41 | 0.40 | 0.40 | 0.39 | 0.39 | 0.39 | 0.38 | 0.38 | 0.38 | 0.37 | 0.36 | 0.34 | 0.33 | 0.31 | 0.24 |
|              | 2 | 0.66 | 0.57 | 0.54 | 0.51 | 0.50 | 0.48 | 0.47 | 0.47 | 0.46 | 0.45 | 0.45 | 0.44 | 0.44 | 0.44 | 0.44 | 0.43 | 0.43 | 0.43 | 0.42 | 0.42 | 0.41 | 0.41 | 0.41 | 0.41 | 0.40 | 0.40 | 0.39 | 0.39 | 0.38 | 0.37 | 0.36 | 0.35 | 0.33 | 0.31 | 0.25 |
|              | 3 | 0.73 | 0.59 | 0.56 | 0.53 | 0.51 | 0.50 | 0.48 | 0.48 | 0.47 | 0.46 | 0.46 | 0.45 | 0.45 | 0.44 | 0.44 | 0.44 | 0.43 | 0.43 | 0.43 | 0.43 | 0.42 | 0.42 | 0.42 | 0.41 | 0.41 | 0.41 | 0.40 | 0.40 | 0.40 | 0.39 | 0.38 | 0.37 | 0.36 | 0.34 | 0.24 |
|              | 4 | 0.69 | 0.62 | 0.59 | 0.56 | 0.54 | 0.52 | 0.51 | 0.50 | 0.49 | 0.48 | 0.48 | 0.47 | 0.47 | 0.46 | 0.46 | 0.46 | 0.45 | 0.45 | 0.45 | 0.44 | 0.44 | 0.43 | 0.43 | 0.43 | 0.42 | 0.42 | 0.41 | 0.41 | 0.40 | 0.40 | 0.39 | 0.38 | 0.36 | 0.34 | 0.25 |
|              | 5 | 0.67 | 0.61 | 0.59 | 0.56 | 0.54 | 0.53 | 0.51 | 0.50 | 0.49 | 0.48 | 0.48 | 0.47 | 0.47 | 0.46 | 0.46 | 0.45 | 0.45 | 0.44 | 0.44 | 0.44 | 0.43 | 0.42 | 0.42 | 0.42 | 0.41 | 0.40 | 0.40 | 0.40 | 0.39 | 0.38 | 0.37 | 0.35 | 0.34 | 0.32 | 0.23 |
|              | 6 | 0.72 | 0.64 | 0.60 | 0.57 | 0.55 | 0.53 | 0.51 | 0.50 | 0.49 | 0.48 | 0.47 | 0.46 | 0.46 | 0.45 | 0.45 | 0.44 | 0.43 | 0.43 | 0.42 | 0.42 | 0.42 | 0.41 | 0.41 | 0.40 | 0.40 | 0.40 | 0.39 | 0.39 | 0.38 | 0.37 | 0.36 | 0.35 | 0.33 | 0.31 | 0.22 |
| HadGEM2-CC   | 1 | 0.60 | 0.54 | 0.49 | 0.47 | 0.45 | 0.44 | 0.43 | 0.42 | 0.41 | 0.40 | 0.39 | 0.38 | 0.37 | 0.36 | 0.35 | 0.35 | 0.34 | 0.33 | 0.33 | 0.32 | 0.31 | 0.31 | 0.30 | 0.29 | 0.29 | 0.28 | 0.27 | 0.27 | 0.26 | 0.25 | 0.24 | 0.23 | 0.22 | 0.20 | 0.15 |
|              | 2 | 0.58 | 0.53 | 0.49 | 0.47 | 0.45 | 0.44 | 0.43 | 0.41 | 0.41 | 0.40 | 0.39 | 0.38 | 0.37 | 0.37 | 0.36 | 0.36 | 0.35 | 0.34 | 0.34 | 0.33 | 0.32 | 0.32 | 0.31 | 0.30 | 0.30 | 0.29 | 0.28 | 0.27 | 0.27 | 0.26 | 0.25 | 0.23 | 0.23 | 0.20 | 0.14 |
|              | 3 | 0.60 | 0.54 | 0.50 | 0.48 | 0.46 | 0.44 | 0.43 | 0.41 | 0.40 | 0.39 | 0.39 | 0.38 | 0.37 | 0.36 | 0.36 | 0.35 | 0.35 | 0.34 | 0.34 | 0.33 | 0.32 | 0.32 | 0.31 | 0.31 | 0.30 | 0.29 | 0.29 | 0.28 | 0.28 | 0.27 | 0.26 | 0.25 | 0.24 | 0.22 | 0.13 |
|              | 4 | 0.58 | 0.53 | 0.49 | 0.47 | 0.45 | 0.44 | 0.42 | 0.41 | 0.40 | 0.40 | 0.39 | 0.38 | 0.37 | 0.37 | 0.36 | 0.35 | 0.35 | 0.34 | 0.33 | 0.33 | 0.32 | 0.31 | 0.31 | 0.30 | 0.30 | 0.29 | 0.28 | 0.28 | 0.27 | 0.27 | 0.26 | 0.25 | 0.23 | 0.22 | 0.13 |
|              | 5 | 0.60 | 0.54 | 0.49 | 0.47 | 0.45 | 0.44 | 0.43 | 0.42 | 0.41 | 0.40 | 0.39 | 0.38 | 0.37 | 0.36 | 0.36 | 0.35 | 0.35 | 0.34 | 0.33 | 0.33 | 0.32 | 0.31 | 0.31 | 0.30 | 0.30 | 0.29 | 0.29 | 0.28 | 0.28 | 0.27 | 0.25 | 0.24 | 0.23 | 0.21 | 0.12 |
|              | 6 | 0.60 | 0.54 | 0.51 | 0.48 | 0.46 | 0.44 | 0.43 | 0.42 | 0.41 | 0.40 | 0.39 | 0.38 | 0.37 | 0.37 | 0.36 | 0.35 | 0.35 | 0.34 | 0.33 | 0.33 | 0.32 | 0.31 | 0.31 | 0.30 | 0.29 | 0.29 | 0.29 | 0.28 | 0.27 | 0.26 | 0.25 | 0.24 | 0.22 | 0.20 | 0.12 |
| IPSL-CM5A-MR | 1 | 0.66 | 0.59 | 0.54 | 0.50 | 0.48 | 0.46 | 0.44 | 0.43 | 0.42 | 0.41 | 0.40 | 0.40 | 0.39 | 0.39 | 0.38 | 0.37 | 0.37 | 0.36 | 0.36 | 0.35 | 0.35 | 0.34 | 0.33 | 0.33 | 0.32 | 0.32 | 0.31 | 0.31 | 0.31 | 0.30 | 0.29 | 0.28 | 0.26 | 0.24 | 0.15 |
|              | 2 | 0.65 | 0.58 | 0.53 | 0.50 | 0.47 | 0.45 | 0.43 | 0.42 | 0.41 | 0.40 | 0.40 | 0.39 | 0.39 | 0.38 | 0.38 | 0.37 | 0.36 | 0.36 | 0.35 | 0.35 | 0.34 | 0.33 | 0.33 | 0.32 | 0.32 | 0.31 | 0.31 | 0.31 | 0.30 | 0.30 | 0.29 | 0.28 | 0.26 | 0.24 | 0.15 |
|              | 3 | 0.66 | 0.59 | 0.52 | 0.48 | 0.46 | 0.44 | 0.43 | 0.42 | 0.41 | 0.41 | 0.40 | 0.39 | 0.39 | 0.38 | 0.37 | 0.37 | 0.36 | 0.35 | 0.35 | 0.34 | 0.34 | 0.33 | 0.32 | 0.32 | 0.32 | 0.32 | 0.31 | 0.31 | 0.31 | 0.30 | 0.29 | 0.28 | 0.26 | 0.24 | 0.16 |
|              | 4 | 0.69 | 0.60 | 0.54 | 0.50 | 0.47 | 0.45 | 0.44 | 0.43 | 0.42 | 0.42 | 0.41 | 0.40 | 0.39 | 0.38 | 0.38 | 0.37 | 0.37 | 0.36 | 0.35 | 0.35 | 0.34 | 0.34 | 0.33 | 0.33 | 0.32 | 0.32 | 0.32 | 0.31 | 0.31 | 0.30 | 0.29 | 0.28 | 0.26 | 0.24 | 0.18 |
|              | 5 | 0.68 | 0.62 | 0.56 | 0.51 | 0.48 | 0.46 | 0.45 | 0.44 | 0.43 | 0.42 | 0.41 | 0.41 | 0.40 | 0.39 | 0.38 | 0.38 | 0.37 | 0.37 | 0.36 | 0.35 | 0.35 | 0.34 | 0.34 | 0.33 | 0.33 | 0.32 | 0.32 | 0.31 | 0.30 | 0.30 | 0.29 | 0.28 | 0.27 | 0.24 | 0.17 |
|              | 6 | 0.67 | 0.61 | 0.55 | 0.50 | 0.47 | 0.45 | 0.44 | 0.43 | 0.42 | 0.41 | 0.41 | 0.40 | 0.39 | 0.39 | 0.38 | 0.37 | 0.37 | 0.36 | 0.36 | 0.35 | 0.35 | 0.34 | 0.34 | 0.33 | 0.33 | 0.32 | 0.31 | 0.31 | 0.30 | 0.29 | 0.28 | 0.28 | 0.27 | 0.24 | 0.18 |
| M            | 1 | 0.65 | 0.57 | 0.52 | 0.49 | 0.47 | 0.46 | 0.46 | 0.45 | 0.44 | 0.43 | 0.42 | 0.42 | 0.41 | 0.41 | 0.40 | 0.39 | 0.39 | 0.38 | 0.37 | 0.37 | 0.36 | 0.35 | 0.35 | 0.34 | 0.34 | 0.33 | 0.32 | 0.32 | 0.31 | 0.30 | 0.28 | 0.26 | 0.24 | 0.22 | 0.18 |

|            |   |      |      |      |      |      |      |      |      |      |      |      |      |      |      |      |      |      |      |      |      |      |      |      |      |      |      |      |      |      |      |      |      |      |      |      |
|------------|---|------|------|------|------|------|------|------|------|------|------|------|------|------|------|------|------|------|------|------|------|------|------|------|------|------|------|------|------|------|------|------|------|------|------|------|
|            | 2 | 0.64 | 0.56 | 0.51 | 0.48 | 0.46 | 0.45 | 0.44 | 0.43 | 0.42 | 0.42 | 0.41 | 0.41 | 0.40 | 0.40 | 0.39 | 0.38 | 0.38 | 0.37 | 0.37 | 0.36 | 0.35 | 0.35 | 0.34 | 0.33 | 0.33 | 0.32 | 0.32 | 0.31 | 0.31 | 0.29 | 0.28 | 0.26 | 0.24 | 0.21 | 0.18 |
|            | 3 | 0.65 | 0.57 | 0.51 | 0.48 | 0.46 | 0.45 | 0.44 | 0.42 | 0.41 | 0.41 | 0.40 | 0.40 | 0.39 | 0.39 | 0.38 | 0.38 | 0.37 | 0.37 | 0.36 | 0.35 | 0.35 | 0.34 | 0.34 | 0.33 | 0.32 | 0.32 | 0.31 | 0.31 | 0.30 | 0.29 | 0.28 | 0.26 | 0.24 | 0.24 | 0.17 |
|            | 4 | 0.66 | 0.59 | 0.52 | 0.49 | 0.47 | 0.45 | 0.44 | 0.43 | 0.42 | 0.41 | 0.41 | 0.40 | 0.40 | 0.39 | 0.38 | 0.38 | 0.37 | 0.37 | 0.36 | 0.36 | 0.35 | 0.34 | 0.34 | 0.33 | 0.32 | 0.32 | 0.31 | 0.30 | 0.30 | 0.29 | 0.27 | 0.25 | 0.23 | 0.22 | 0.15 |
|            | 5 | 0.68 | 0.59 | 0.53 | 0.49 | 0.47 | 0.46 | 0.45 | 0.43 | 0.42 | 0.42 | 0.41 | 0.40 | 0.40 | 0.39 | 0.39 | 0.38 | 0.38 | 0.37 | 0.37 | 0.36 | 0.36 | 0.35 | 0.34 | 0.33 | 0.32 | 0.32 | 0.31 | 0.30 | 0.30 | 0.28 | 0.27 | 0.26 | 0.24 | 0.22 | 0.15 |
|            | 6 | 0.69 | 0.61 | 0.54 | 0.51 | 0.49 | 0.47 | 0.45 | 0.44 | 0.43 | 0.43 | 0.42 | 0.41 | 0.41 | 0.40 | 0.40 | 0.39 | 0.38 | 0.38 | 0.37 | 0.36 | 0.36 | 0.35 | 0.34 | 0.33 | 0.33 | 0.32 | 0.31 | 0.30 | 0.29 | 0.28 | 0.26 | 0.25 | 0.25 | 0.23 | 0.13 |
| MPI-ESM-LR | 1 | 0.59 | 0.53 | 0.48 | 0.45 | 0.42 | 0.40 | 0.39 | 0.38 | 0.37 | 0.37 | 0.36 | 0.36 | 0.35 | 0.35 | 0.34 | 0.33 | 0.33 | 0.32 | 0.31 | 0.31 | 0.30 | 0.30 | 0.29 | 0.28 | 0.28 | 0.27 | 0.27 | 0.26 | 0.26 | 0.25 | 0.24 | 0.23 | 0.20 | 0.18 | 0.13 |
|            | 2 | 0.63 | 0.55 | 0.48 | 0.45 | 0.42 | 0.41 | 0.39 | 0.38 | 0.37 | 0.36 | 0.36 | 0.35 | 0.35 | 0.34 | 0.33 | 0.33 | 0.32 | 0.32 | 0.31 | 0.30 | 0.30 | 0.29 | 0.29 | 0.28 | 0.27 | 0.27 | 0.26 | 0.25 | 0.25 | 0.25 | 0.24 | 0.23 | 0.21 | 0.19 | 0.13 |
|            | 3 | 0.63 | 0.54 | 0.48 | 0.44 | 0.42 | 0.40 | 0.39 | 0.38 | 0.37 | 0.36 | 0.36 | 0.35 | 0.34 | 0.34 | 0.33 | 0.33 | 0.32 | 0.32 | 0.31 | 0.30 | 0.30 | 0.29 | 0.29 | 0.28 | 0.27 | 0.27 | 0.26 | 0.26 | 0.25 | 0.24 | 0.24 | 0.23 | 0.21 | 0.19 | 0.14 |
|            | 4 | 0.62 | 0.53 | 0.47 | 0.44 | 0.41 | 0.39 | 0.38 | 0.37 | 0.37 | 0.36 | 0.36 | 0.35 | 0.34 | 0.34 | 0.33 | 0.33 | 0.32 | 0.32 | 0.31 | 0.30 | 0.30 | 0.29 | 0.29 | 0.28 | 0.28 | 0.27 | 0.26 | 0.26 | 0.26 | 0.25 | 0.24 | 0.23 | 0.22 | 0.21 | 0.13 |
|            | 5 | 0.60 | 0.52 | 0.47 | 0.44 | 0.42 | 0.40 | 0.38 | 0.37 | 0.36 | 0.36 | 0.35 | 0.35 | 0.34 | 0.34 | 0.33 | 0.33 | 0.32 | 0.32 | 0.31 | 0.30 | 0.30 | 0.29 | 0.28 | 0.28 | 0.27 | 0.27 | 0.26 | 0.26 | 0.26 | 0.25 | 0.24 | 0.23 | 0.22 | 0.20 | 0.14 |
|            | 6 | 0.58 | 0.51 | 0.47 | 0.44 | 0.42 | 0.40 | 0.39 | 0.37 | 0.37 | 0.36 | 0.35 | 0.35 | 0.34 | 0.34 | 0.33 | 0.33 | 0.32 | 0.32 | 0.31 | 0.30 | 0.30 | 0.29 | 0.28 | 0.28 | 0.27 | 0.27 | 0.26 | 0.25 | 0.25 | 0.24 | 0.23 | 0.23 | 0.21 | 0.18 | 0.13 |
| MPI-ESM-MR | 1 | 0.57 | 0.50 | 0.47 | 0.44 | 0.42 | 0.40 | 0.39 | 0.38 | 0.37 | 0.36 | 0.35 | 0.35 | 0.34 | 0.33 | 0.33 | 0.32 | 0.32 | 0.31 | 0.31 | 0.31 | 0.30 | 0.30 | 0.29 | 0.29 | 0.28 | 0.28 | 0.28 | 0.28 | 0.27 | 0.26 | 0.25 | 0.24 | 0.24 | 0.21 | 0.14 |
|            | 2 | 0.58 | 0.51 | 0.47 | 0.44 | 0.42 | 0.40 | 0.39 | 0.38 | 0.37 | 0.36 | 0.35 | 0.35 | 0.34 | 0.34 | 0.33 | 0.33 | 0.32 | 0.32 | 0.31 | 0.31 | 0.30 | 0.30 | 0.29 | 0.29 | 0.29 | 0.28 | 0.28 | 0.27 | 0.27 | 0.26 | 0.26 | 0.25 | 0.23 | 0.21 | 0.13 |
|            | 3 | 0.60 | 0.52 | 0.47 | 0.44 | 0.43 | 0.42 | 0.40 | 0.39 | 0.38 | 0.37 | 0.36 | 0.36 | 0.35 | 0.34 | 0.34 | 0.33 | 0.33 | 0.32 | 0.32 | 0.31 | 0.31 | 0.31 | 0.30 | 0.30 | 0.29 | 0.29 | 0.29 | 0.29 | 0.28 | 0.27 | 0.26 | 0.25 | 0.24 | 0.21 | 0.13 |
|            | 4 | 0.60 | 0.53 | 0.48 | 0.45 | 0.43 | 0.41 | 0.39 | 0.38 | 0.38 | 0.37 | 0.36 | 0.36 | 0.35 | 0.35 | 0.34 | 0.33 | 0.33 | 0.32 | 0.32 | 0.31 | 0.30 | 0.30 | 0.29 | 0.29 | 0.29 | 0.28 | 0.28 | 0.27 | 0.27 | 0.26 | 0.25 | 0.25 | 0.24 | 0.21 | 0.13 |
|            | 5 | 0.59 | 0.51 | 0.46 | 0.43 | 0.42 | 0.41 | 0.40 | 0.39 | 0.38 | 0.37 | 0.37 | 0.36 | 0.36 | 0.35 | 0.34 | 0.34 | 0.33 | 0.32 | 0.32 | 0.31 | 0.31 | 0.30 | 0.29 | 0.29 | 0.28 | 0.28 | 0.27 | 0.26 | 0.26 | 0.25 | 0.25 | 0.24 | 0.22 | 0.20 | 0.13 |
|            | 6 | 0.60 | 0.52 | 0.47 | 0.45 | 0.44 | 0.42 | 0.40 | 0.39 | 0.39 | 0.38 | 0.37 | 0.37 | 0.36 | 0.35 | 0.35 | 0.34 | 0.34 | 0.33 | 0.33 | 0.32 | 0.31 | 0.31 | 0.30 | 0.29 | 0.29 | 0.28 | 0.28 | 0.27 | 0.27 | 0.26 | 0.25 | 0.24 | 0.23 | 0.21 | 0.12 |

|           |   |      |      |      |      |      |      |      |      |      |      |      |      |      |      |      |      |      |      |      |      |      |      |      |      |      |      |      |      |      |      |      |      |      |      |      |
|-----------|---|------|------|------|------|------|------|------|------|------|------|------|------|------|------|------|------|------|------|------|------|------|------|------|------|------|------|------|------|------|------|------|------|------|------|------|
| MPI-ESM-P | 1 | 0.61 | 0.52 | 0.47 | 0.44 | 0.42 | 0.40 | 0.38 | 0.37 | 0.37 | 0.36 | 0.36 | 0.35 | 0.35 | 0.34 | 0.34 | 0.34 | 0.33 | 0.33 | 0.32 | 0.32 | 0.32 | 0.31 | 0.31 | 0.30 | 0.30 | 0.30 | 0.29 | 0.29 | 0.28 | 0.27 | 0.27 | 0.26 | 0.25 | 0.23 | 0.15 |
|           | 2 | 0.60 | 0.53 | 0.49 | 0.46 | 0.43 | 0.41 | 0.39 | 0.38 | 0.37 | 0.37 | 0.36 | 0.36 | 0.35 | 0.35 | 0.34 | 0.34 | 0.33 | 0.32 | 0.32 | 0.31 | 0.31 | 0.30 | 0.30 | 0.29 | 0.29 | 0.28 | 0.28 | 0.27 | 0.27 | 0.26 | 0.25 | 0.24 | 0.24 | 0.22 | 0.17 |
|           | 3 | 0.60 | 0.53 | 0.49 | 0.46 | 0.43 | 0.42 | 0.41 | 0.40 | 0.39 | 0.38 | 0.37 | 0.36 | 0.36 | 0.35 | 0.34 | 0.34 | 0.33 | 0.32 | 0.32 | 0.31 | 0.31 | 0.30 | 0.30 | 0.29 | 0.28 | 0.28 | 0.27 | 0.27 | 0.26 | 0.26 | 0.25 | 0.25 | 0.24 | 0.22 | 0.17 |
|           | 4 | 0.63 | 0.54 | 0.49 | 0.46 | 0.44 | 0.42 | 0.41 | 0.40 | 0.39 | 0.38 | 0.37 | 0.36 | 0.36 | 0.35 | 0.34 | 0.34 | 0.33 | 0.32 | 0.32 | 0.31 | 0.31 | 0.30 | 0.29 | 0.29 | 0.28 | 0.28 | 0.27 | 0.27 | 0.26 | 0.25 | 0.25 | 0.24 | 0.23 | 0.21 | 0.16 |
|           | 5 | 0.60 | 0.53 | 0.49 | 0.46 | 0.44 | 0.42 | 0.41 | 0.40 | 0.39 | 0.38 | 0.37 | 0.36 | 0.36 | 0.35 | 0.34 | 0.34 | 0.33 | 0.32 | 0.31 | 0.31 | 0.30 | 0.29 | 0.29 | 0.28 | 0.28 | 0.27 | 0.26 | 0.26 | 0.25 | 0.24 | 0.23 | 0.22 | 0.22 | 0.20 | 0.12 |
|           | 6 | 0.60 | 0.53 | 0.48 | 0.46 | 0.43 | 0.42 | 0.40 | 0.39 | 0.39 | 0.38 | 0.37 | 0.36 | 0.36 | 0.35 | 0.34 | 0.34 | 0.33 | 0.32 | 0.32 | 0.31 | 0.30 | 0.30 | 0.29 | 0.28 | 0.28 | 0.27 | 0.27 | 0.26 | 0.26 | 0.25 | 0.24 | 0.23 | 0.22 | 0.20 | 0.14 |
| MRI-CGCM3 | 1 | 0.62 | 0.56 | 0.50 | 0.46 | 0.44 | 0.43 | 0.41 | 0.40 | 0.39 | 0.39 | 0.38 | 0.37 | 0.37 | 0.36 | 0.35 | 0.35 | 0.34 | 0.34 | 0.33 | 0.33 | 0.32 | 0.32 | 0.32 | 0.31 | 0.31 | 0.31 | 0.31 | 0.30 | 0.30 | 0.29 | 0.28 | 0.27 | 0.25 | 0.23 | 0.14 |
|           | 2 | 0.62 | 0.55 | 0.50 | 0.45 | 0.43 | 0.42 | 0.41 | 0.40 | 0.39 | 0.38 | 0.37 | 0.36 | 0.36 | 0.35 | 0.35 | 0.34 | 0.33 | 0.33 | 0.32 | 0.32 | 0.31 | 0.31 | 0.31 | 0.31 | 0.30 | 0.30 | 0.30 | 0.30 | 0.29 | 0.29 | 0.28 | 0.27 | 0.25 | 0.23 | 0.15 |
|           | 3 | 0.59 | 0.53 | 0.48 | 0.45 | 0.43 | 0.42 | 0.40 | 0.39 | 0.38 | 0.38 | 0.37 | 0.36 | 0.36 | 0.35 | 0.34 | 0.34 | 0.33 | 0.33 | 0.32 | 0.32 | 0.31 | 0.31 | 0.30 | 0.30 | 0.30 | 0.30 | 0.29 | 0.29 | 0.29 | 0.28 | 0.28 | 0.26 | 0.25 | 0.23 | 0.15 |
|           | 4 | 0.58 | 0.53 | 0.48 | 0.44 | 0.41 | 0.40 | 0.39 | 0.38 | 0.37 | 0.36 | 0.36 | 0.35 | 0.34 | 0.34 | 0.33 | 0.33 | 0.32 | 0.32 | 0.32 | 0.31 | 0.31 | 0.30 | 0.30 | 0.30 | 0.30 | 0.30 | 0.29 | 0.29 | 0.28 | 0.27 | 0.27 | 0.26 | 0.24 | 0.22 | 0.16 |
|           | 5 | 0.59 | 0.53 | 0.47 | 0.43 | 0.41 | 0.40 | 0.39 | 0.38 | 0.38 | 0.37 | 0.36 | 0.36 | 0.35 | 0.34 | 0.34 | 0.33 | 0.33 | 0.32 | 0.32 | 0.32 | 0.32 | 0.31 | 0.31 | 0.30 | 0.30 | 0.30 | 0.29 | 0.29 | 0.29 | 0.28 | 0.26 | 0.25 | 0.24 | 0.21 | 0.16 |



|           |   |      |      |      |      |      |      |      |      |      |      |      |      |      |      |      |      |      |      |      |      |      |      |      |      |      |      |      |      |      |      |      |      |      |      |      |
|-----------|---|------|------|------|------|------|------|------|------|------|------|------|------|------|------|------|------|------|------|------|------|------|------|------|------|------|------|------|------|------|------|------|------|------|------|------|
| MRI-ESM1  | 6 | 0.56 | 0.53 | 0.47 | 0.44 | 0.42 | 0.41 | 0.40 | 0.39 | 0.38 | 0.38 | 0.37 | 0.36 | 0.36 | 0.35 | 0.34 | 0.34 | 0.34 | 0.33 | 0.33 | 0.33 | 0.32 | 0.32 | 0.31 | 0.31 | 0.31 | 0.30 | 0.30 | 0.29 | 0.29 | 0.28 | 0.27 | 0.26 | 0.24 | 0.22 | 0.13 |
|           | 1 | 0.61 | 0.56 | 0.51 | 0.46 | 0.44 | 0.42 | 0.41 | 0.40 | 0.39 | 0.38 | 0.37 | 0.37 | 0.36 | 0.36 | 0.35 | 0.34 | 0.34 | 0.34 | 0.33 | 0.33 | 0.33 | 0.32 | 0.32 | 0.32 | 0.31 | 0.31 | 0.31 | 0.30 | 0.30 | 0.29 | 0.28 | 0.27 | 0.26 | 0.24 | 0.14 |
|           | 2 | 0.59 | 0.55 | 0.50 | 0.46 | 0.44 | 0.42 | 0.41 | 0.40 | 0.39 | 0.38 | 0.37 | 0.37 | 0.36 | 0.36 | 0.35 | 0.35 | 0.34 | 0.34 | 0.33 | 0.33 | 0.33 | 0.32 | 0.32 | 0.31 | 0.31 | 0.31 | 0.30 | 0.30 | 0.30 | 0.29 | 0.28 | 0.27 | 0.25 | 0.23 | 0.15 |
|           | 3 | 0.61 | 0.56 | 0.50 | 0.46 | 0.44 | 0.42 | 0.41 | 0.39 | 0.38 | 0.37 | 0.37 | 0.36 | 0.36 | 0.35 | 0.35 | 0.34 | 0.34 | 0.33 | 0.33 | 0.32 | 0.32 | 0.32 | 0.31 | 0.31 | 0.31 | 0.31 | 0.30 | 0.30 | 0.30 | 0.29 | 0.28 | 0.27 | 0.26 | 0.24 | 0.14 |
|           | 4 | 0.62 | 0.57 | 0.51 | 0.46 | 0.44 | 0.42 | 0.41 | 0.39 | 0.38 | 0.37 | 0.36 | 0.36 | 0.35 | 0.34 | 0.34 | 0.34 | 0.33 | 0.33 | 0.33 | 0.32 | 0.32 | 0.32 | 0.32 | 0.31 | 0.31 | 0.31 | 0.30 | 0.30 | 0.30 | 0.29 | 0.28 | 0.26 | 0.25 | 0.22 | 0.15 |
|           | 5 | 0.61 | 0.57 | 0.51 | 0.47 | 0.45 | 0.43 | 0.41 | 0.39 | 0.38 | 0.37 | 0.36 | 0.36 | 0.35 | 0.35 | 0.34 | 0.34 | 0.33 | 0.33 | 0.32 | 0.32 | 0.32 | 0.31 | 0.31 | 0.31 | 0.31 | 0.30 | 0.30 | 0.30 | 0.29 | 0.28 | 0.27 | 0.25 | 0.24 | 0.22 | 0.15 |
|           | 6 | 0.61 | 0.56 | 0.50 | 0.44 | 0.43 | 0.41 | 0.40 | 0.38 | 0.37 | 0.37 | 0.36 | 0.36 | 0.35 | 0.34 | 0.34 | 0.33 | 0.33 | 0.32 | 0.32 | 0.32 | 0.31 | 0.31 | 0.31 | 0.30 | 0.30 | 0.29 | 0.29 | 0.28 | 0.28 | 0.27 | 0.26 | 0.25 | 0.23 | 0.21 | 0.15 |
| NorESM1-M | 1 | 0.71 | 0.64 | 0.58 | 0.54 | 0.51 | 0.49 | 0.47 | 0.46 | 0.45 | 0.44 | 0.42 | 0.41 | 0.41 | 0.40 | 0.39 | 0.39 | 0.38 | 0.38 | 0.37 | 0.37 | 0.36 | 0.36 | 0.35 | 0.35 | 0.35 | 0.35 | 0.34 | 0.34 | 0.33 | 0.32 | 0.31 | 0.29 | 0.27 | 0.24 | 0.17 |
|           | 2 | 0.73 | 0.65 | 0.58 | 0.53 | 0.50 | 0.48 | 0.46 | 0.45 | 0.43 | 0.43 | 0.42 | 0.41 | 0.40 | 0.39 | 0.39 | 0.38 | 0.38 | 0.37 | 0.37 | 0.36 | 0.36 | 0.36 | 0.35 | 0.35 | 0.34 | 0.34 | 0.34 | 0.33 | 0.33 | 0.32 | 0.31 | 0.29 | 0.27 | 0.24 | 0.17 |
|           | 3 | 0.73 | 0.65 | 0.59 | 0.55 | 0.50 | 0.48 | 0.47 | 0.46 | 0.45 | 0.44 | 0.43 | 0.42 | 0.41 | 0.41 | 0.40 | 0.40 | 0.39 | 0.39 | 0.38 | 0.38 | 0.37 | 0.37 | 0.36 | 0.36 | 0.36 | 0.35 | 0.35 | 0.34 | 0.34 | 0.33 | 0.32 | 0.30 | 0.28 | 0.25 | 0.16 |
|           | 4 | 0.73 | 0.65 | 0.59 | 0.55 | 0.51 | 0.49 | 0.47 | 0.46 | 0.45 | 0.44 | 0.43 | 0.42 | 0.42 | 0.41 | 0.40 | 0.40 | 0.39 | 0.38 | 0.38 | 0.37 | 0.37 | 0.36 | 0.36 | 0.35 | 0.35 | 0.34 | 0.34 | 0.34 | 0.33 | 0.33 | 0.31 | 0.30 | 0.28 | 0.25 | 0.17 |
|           | 5 | 0.72 | 0.64 | 0.57 | 0.53 | 0.50 | 0.48 | 0.46 | 0.45 | 0.44 | 0.43 | 0.42 | 0.42 | 0.41 | 0.40 | 0.40 | 0.39 | 0.39 | 0.38 | 0.38 | 0.37 | 0.37 | 0.36 | 0.36 | 0.35 | 0.35 | 0.35 | 0.35 | 0.34 | 0.34 | 0.33 | 0.32 | 0.30 | 0.29 | 0.25 | 0.17 |
|           | 6 | 0.71 | 0.62 | 0.55 | 0.52 | 0.50 | 0.48 | 0.46 | 0.45 | 0.44 | 0.43 | 0.43 | 0.42 | 0.41 | 0.41 | 0.40 | 0.39 | 0.38 | 0.38 | 0.37 | 0.37 | 0.36 | 0.36 | 0.35 | 0.35 | 0.34 | 0.34 | 0.34 | 0.33 | 0.33 | 0.32 | 0.31 | 0.29 | 0.28 | 0.25 | 0.17 |

**Table S2.** False positive rates (FPR) in case of each CP map associated with the percentile values between 2.5 and 95. Numbers in the 2<sup>nd</sup> column indicate the analyzed periods similarly to Table S1. The reference CP maps obtained from the ERA-20C are associated with the following percentiles: 17.5% (in period 1); 20% (2); 27.5% (3, 4); 25% (5, 6).

|              |   | 2.5  | 5    | 7.5  | 10   | 12.5 | 15   | 17.5 | 20   | 22.5 | 25   | 27.5 | 30   | 32.5 | 35   | 37.5 | 40   | 42.5 | 45   | 47.5 | 50   | 52.5 | 55   | 57.5 | 60   | 62.5 | 65   | 67.5 | 70   | 72.5 | 75   | 77.5 | 80   | 85   | 90   | 95   |      |
|--------------|---|------|------|------|------|------|------|------|------|------|------|------|------|------|------|------|------|------|------|------|------|------|------|------|------|------|------|------|------|------|------|------|------|------|------|------|------|
| ERA-20C      | 1 | 0.00 | 0.00 | 0.00 | 0.00 | 0.00 | 0.00 | 0.00 | 0.03 | 0.06 | 0.09 | 0.12 | 0.15 | 0.18 | 0.21 | 0.24 | 0.27 | 0.30 | 0.33 | 0.36 | 0.39 | 0.42 | 0.45 | 0.48 | 0.52 | 0.54 | 0.57 | 0.64 | 0.64 | 0.67 | 0.70 | 0.73 | 0.75 | 0.82 | 0.88 | 0.94 |      |
|              | 2 | 0.00 | 0.00 | 0.00 | 0.00 | 0.00 | 0.00 | 0.00 | 0.00 | 0.03 | 0.06 | 0.09 | 0.13 | 0.16 | 0.19 | 0.22 | 0.25 | 0.28 | 0.31 | 0.34 | 0.37 | 0.40 | 0.43 | 0.46 | 0.50 | 0.53 | 0.56 | 0.59 | 0.62 | 0.66 | 0.69 | 0.72 | 0.75 | 0.83 | 0.87 | 0.94 |      |
|              | 3 | 0.00 | 0.00 | 0.00 | 0.00 | 0.00 | 0.00 | 0.00 | 0.00 | 0.00 | 0.00 | 0.00 | 0.03 | 0.07 | 0.10 | 0.14 | 0.17 | 0.21 | 0.24 | 0.28 | 0.31 | 0.34 | 0.38 | 0.41 | 0.45 | 0.48 | 0.52 | 0.55 | 0.59 | 0.62 | 0.65 | 0.68 | 0.71 | 0.80 | 0.86 | 0.93 |      |
|              | 4 | 0.00 | 0.00 | 0.00 | 0.00 | 0.00 | 0.00 | 0.00 | 0.00 | 0.00 | 0.00 | 0.00 | 0.03 | 0.07 | 0.10 | 0.14 | 0.17 | 0.21 | 0.24 | 0.28 | 0.31 | 0.34 | 0.38 | 0.41 | 0.45 | 0.48 | 0.52 | 0.55 | 0.58 | 0.61 | 0.65 | 0.68 | 0.72 | 0.79 | 0.86 | 0.93 |      |
|              | 5 | 0.00 | 0.00 | 0.00 | 0.00 | 0.00 | 0.00 | 0.00 | 0.00 | 0.00 | 0.00 | 0.00 | 0.04 | 0.07 | 0.10 | 0.14 | 0.17 | 0.20 | 0.24 | 0.27 | 0.30 | 0.34 | 0.37 | 0.40 | 0.43 | 0.46 | 0.50 | 0.52 | 0.55 | 0.58 | 0.63 | 0.67 | 0.70 | 0.73 | 0.81 | 0.87 | 0.93 |
|              | 6 | 0.00 | 0.00 | 0.00 | 0.00 | 0.00 | 0.00 | 0.00 | 0.00 | 0.00 | 0.00 | 0.00 | 0.03 | 0.07 | 0.10 | 0.13 | 0.17 | 0.20 | 0.23 | 0.27 | 0.30 | 0.33 | 0.36 | 0.40 | 0.43 | 0.46 | 0.48 | 0.53 | 0.57 | 0.60 | 0.63 | 0.67 | 0.70 | 0.73 | 0.80 | 0.87 | 0.93 |
| NCEP/NCAR R1 | 1 | 0.00 | 0.00 | 0.00 | 0.00 | 0.01 | 0.01 | 0.03 | 0.05 | 0.07 | 0.10 | 0.13 | 0.15 | 0.18 | 0.21 | 0.24 | 0.27 | 0.30 | 0.33 | 0.36 | 0.39 | 0.42 | 0.45 | 0.48 | 0.52 | 0.55 | 0.58 | 0.61 | 0.64 | 0.67 | 0.70 | 0.73 | 0.75 | 0.84 | 0.88 | 0.94 |      |
|              | 2 | 0.00 | 0.00 | 0.00 | 0.00 | 0.01 | 0.01 | 0.02 | 0.03 | 0.05 | 0.08 | 0.10 | 0.13 | 0.16 | 0.19 | 0.22 | 0.25 | 0.28 | 0.31 | 0.34 | 0.37 | 0.40 | 0.44 | 0.47 | 0.50 | 0.53 | 0.56 | 0.59 | 0.62 | 0.66 | 0.69 | 0.72 | 0.75 | 0.81 | 0.87 | 0.96 |      |
|              | 3 | 0.00 | 0.00 | 0.00 | 0.00 | 0.00 | 0.00 | 0.00 | 0.01 | 0.01 | 0.02 | 0.04 | 0.06 | 0.08 | 0.11 | 0.14 | 0.18 | 0.21 | 0.24 | 0.28 | 0.31 | 0.35 | 0.38 | 0.41 | 0.45 | 0.48 | 0.52 | 0.55 | 0.57 | 0.62 | 0.65 | 0.69 | 0.72 | 0.79 | 0.88 | 0.93 |      |
|              | 4 | 0.00 | 0.00 | 0.00 | 0.00 | 0.00 | 0.00 | 0.00 | 0.01 | 0.02 | 0.04 | 0.06 | 0.08 | 0.11 | 0.14 | 0.17 | 0.21 | 0.24 | 0.27 | 0.31 | 0.34 | 0.38 | 0.41 | 0.45 | 0.48 | 0.51 | 0.54 | 0.57 | 0.62 | 0.65 | 0.69 | 0.72 | 0.79 | 0.88 | 0.93 |      |      |
|              | 5 | 0.00 | 0.00 | 0.00 | 0.00 | 0.00 | 0.00 | 0.00 | 0.01 | 0.02 | 0.03 | 0.05 | 0.08 | 0.11 | 0.14 | 0.17 | 0.20 | 0.24 | 0.27 | 0.30 | 0.34 | 0.37 | 0.40 | 0.43 | 0.45 | 0.50 | 0.53 | 0.57 | 0.60 | 0.63 | 0.67 | 0.70 | 0.73 | 0.80 | 0.87 | 0.93 |      |
|              | 6 | 0.00 | 0.00 | 0.00 | 0.00 | 0.00 | 0.00 | 0.00 | 0.01 | 0.02 | 0.04 | 0.07 | 0.10 | 0.13 | 0.17 | 0.20 | 0.23 | 0.27 | 0.30 | 0.33 | 0.37 | 0.40 | 0.42 | 0.45 | 0.50 | 0.53 | 0.57 | 0.60 | 0.63 | 0.67 | 0.70 | 0.73 | 0.80 | 0.87 | 0.94 |      |      |
| ACCESS1-0    | 1 | 0.00 | 0.01 | 0.02 | 0.03 | 0.04 | 0.06 | 0.07 | 0.09 | 0.11 | 0.13 | 0.15 | 0.18 | 0.21 | 0.23 | 0.26 | 0.28 | 0.31 | 0.34 | 0.37 | 0.39 | 0.42 | 0.45 | 0.48 | 0.51 | 0.54 | 0.57 | 0.60 | 0.63 | 0.66 | 0.69 | 0.73 | 0.77 | 0.82 | 0.88 | 0.94 |      |
|              | 2 | 0.00 | 0.00 | 0.01 | 0.01 | 0.03 | 0.04 | 0.06 | 0.08 | 0.09 | 0.11 | 0.13 | 0.16 | 0.18 | 0.21 | 0.24 | 0.27 | 0.29 | 0.32 | 0.35 | 0.38 | 0.41 | 0.44 | 0.47 | 0.50 | 0.53 | 0.56 | 0.59 | 0.62 | 0.65 | 0.68 | 0.71 | 0.74 | 0.81 | 0.87 | 0.94 |      |
|              | 3 | 0.00 | 0.00 | 0.01 | 0.02 | 0.02 | 0.03 | 0.05 | 0.06 | 0.08 | 0.09 | 0.10 | 0.12 | 0.14 | 0.16 | 0.18 | 0.21 | 0.23 | 0.26 | 0.28 | 0.31 | 0.35 | 0.38 | 0.41 | 0.44 | 0.48 | 0.51 | 0.57 | 0.58 | 0.61 | 0.65 | 0.68 | 0.72 | 0.78 | 0.86 | 0.93 |      |
|              | 4 | 0.00 | 0.00 | 0.00 | 0.01 | 0.02 | 0.03 | 0.04 | 0.06 | 0.07 | 0.09 | 0.11 | 0.13 | 0.15 | 0.17 | 0.19 | 0.21 | 0.24 | 0.27 | 0.29 | 0.32 | 0.35 | 0.38 | 0.41 | 0.44 | 0.48 | 0.51 | 0.54 | 0.58 | 0.61 | 0.65 | 0.71 | 0.71 | 0.78 | 0.86 | 0.93 |      |
|              | 5 | 0.00 | 0.00 | 0.01 | 0.02 | 0.03 | 0.05 | 0.07 | 0.09 | 0.11 | 0.13 | 0.15 | 0.18 | 0.20 | 0.22 | 0.24 | 0.26 | 0.28 | 0.31 | 0.33 | 0.35 | 0.38 | 0.40 | 0.44 | 0.46 | 0.50 | 0.53 | 0.56 | 0.63 | 0.63 | 0.66 | 0.69 | 0.73 | 0.79 | 0.87 | 0.93 |      |
|              | 6 | 0.00 | 0.00 | 0.00 | 0.01 | 0.03 | 0.04 | 0.06 | 0.08 | 0.09 | 0.11 | 0.13 | 0.15 | 0.17 | 0.19 | 0.21 | 0.23 | 0.26 | 0.29 | 0.31 | 0.34 | 0.37 | 0.40 | 0.43 | 0.46 | 0.49 | 0.53 | 0.56 | 0.59 | 0.63 | 0.66 | 0.69 | 0.73 | 0.79 | 0.85 | 0.93 |      |
| ACCESS1-3    | 1 | 0.00 | 0.01 | 0.02 | 0.04 | 0.05 | 0.07 | 0.09 | 0.11 | 0.13 | 0.16 | 0.18 | 0.21 | 0.23 | 0.26 | 0.28 | 0.30 | 0.33 | 0.36 | 0.38 | 0.41 | 0.44 | 0.46 | 0.49 | 0.52 | 0.55 | 0.58 | 0.60 | 0.66 | 0.66 | 0.69 | 0.73 | 0.76 | 0.82 | 0.88 | 0.94 |      |
|              | 2 | 0.00 | 0.01 | 0.02 | 0.03 | 0.04 | 0.06 | 0.08 | 0.09 | 0.11 | 0.14 | 0.16 | 0.19 | 0.21 | 0.24 | 0.26 | 0.28 | 0.31 | 0.34 | 0.37 | 0.39 | 0.42 | 0.44 | 0.47 | 0.53 | 0.53 | 0.56 | 0.59 | 0.62 | 0.66 | 0.69 | 0.72 | 0.75 | 0.81 | 0.87 | 0.94 |      |
|              | 3 | 0.00 | 0.01 | 0.01 | 0.02 | 0.04 | 0.05 | 0.06 | 0.07 | 0.09 | 0.11 | 0.12 | 0.14 | 0.16 | 0.17 | 0.19 | 0.22 | 0.24 | 0.27 | 0.29 | 0.32 | 0.35 | 0.38 | 0.42 | 0.45 | 0.48 | 0.51 | 0.54 | 0.58 | 0.62 | 0.66 | 0.70 | 0.73 | 0.79 | 0.86 | 0.93 |      |
|              | 4 | 0.00 | 0.00 | 0.01 | 0.02 | 0.03 | 0.04 | 0.05 | 0.07 | 0.08 | 0.10 | 0.13 | 0.15 | 0.17 | 0.19 | 0.21 | 0.23 | 0.25 | 0.27 | 0.30 | 0.33 | 0.36 | 0.39 | 0.42 | 0.45 | 0.48 | 0.52 | 0.55 | 0.58 | 0.62 | 0.65 | 0.68 | 0.71 | 0.78 | 0.86 | 0.93 |      |
|              | 5 | 0.00 | 0.00 | 0.01 | 0.02 | 0.04 | 0.05 | 0.07 | 0.08 | 0.10 | 0.12 | 0.14 | 0.16 | 0.18 | 0.20 | 0.22 | 0.24 | 0.27 | 0.29 | 0.32 | 0.35 | 0.37 | 0.40 | 0.43 | 0.46 | 0.49 | 0.52 | 0.55 | 0.58 | 0.63 | 0.67 | 0.70 | 0.73 | 0.80 | 0.87 | 0.93 |      |
|              | 6 | 0.00 | 0.00 | 0.01 | 0.02 | 0.04 | 0.05 | 0.06 | 0.08 | 0.09 | 0.11 | 0.13 | 0.15 | 0.17 | 0.19 | 0.21 | 0.23 | 0.26 | 0.29 | 0.31 | 0.34 | 0.37 | 0.40 | 0.43 | 0.46 | 0.49 | 0.52 | 0.55 | 0.57 | 0.63 | 0.66 | 0.69 | 0.72 | 0.80 | 0.87 | 0.93 |      |
| CCSM4        | 1 | 0.00 | 0.01 | 0.02 | 0.04 | 0.05 | 0.07 | 0.09 | 0.11 | 0.13 | 0.15 | 0.17 | 0.20 | 0.22 | 0.24 | 0.27 | 0.31 | 0.34 | 0.37 | 0.39 | 0.42 | 0.45 | 0.48 | 0.50 | 0.53 | 0.56 | 0.59 | 0.61 | 0.64 | 0.67 | 0.69 | 0.71 | 0.73 | 0.82 | 0.88 | 0.94 |      |
|              | 2 | 0.00 | 0.00 | 0.01 | 0.03 | 0.05 | 0.06 | 0.08 | 0.10 | 0.11 | 0.14 | 0.16 | 0.19 | 0.21 | 0.24 | 0.27 | 0.29 | 0.33 | 0.35 | 0.38 | 0.41 | 0.44 | 0.46 | 0.49 | 0.52 | 0.55 | 0.58 | 0.60 | 0.63 | 0.66 | 0.69 | 0.72 | 0.75 | 0.81 | 0.88 | 0.94 |      |
|              | 3 | 0.00 | 0.00 | 0.01 | 0.02 | 0.04 | 0.07 | 0.08 | 0.10 | 0.12 | 0.14 | 0.17 | 0.19 | 0.21 | 0.24 | 0.26 | 0.29 | 0.32 | 0.35 | 0.38 | 0.40 | 0.43 | 0.46 | 0.48 | 0.51 | 0.54 | 0.57 | 0.60 | 0.63 | 0.65 | 0.68 | 0.71 | 0.73 | 0.80 | 0.87 | 0.93 |      |
|              | 4 | 0.00 | 0.00 | 0.01 | 0.03 | 0.04 | 0.06 | 0.07 | 0.09 | 0.11 | 0.13 | 0.15 | 0.18 | 0.20 | 0.23 | 0.25 | 0.28 | 0.30 | 0.34 | 0.36 | 0.39 | 0.43 | 0.45 | 0.48 | 0.51 | 0.54 | 0.57 | 0.60 | 0.62 | 0.65 | 0.68 | 0.72 | 0.75 | 0.80 | 0.87 | 0.93 |      |



|            | 5 | 6    | 0.00 | 0.00 | 0.01 | 0.02 | 0.03 | 0.05 | 0.07 | 0.09 | 0.12 | 0.14 | 0.17 | 0.19 | 0.23 | 0.25 | 0.28 | 0.29 | 0.34 | 0.37 | 0.40 | 0.43 | 0.46 | 0.48 | 0.51 | 0.54 | 0.57 | 0.59 | 0.62 | 0.65 | 0.68 | 0.71 | 0.73 | 0.76 | 0.82 | 0.87 | 0.93 |
|------------|---|------|------|------|------|------|------|------|------|------|------|------|------|------|------|------|------|------|------|------|------|------|------|------|------|------|------|------|------|------|------|------|------|------|------|------|------|
|            | 6 | 0.00 | 0.00 | 0.00 | 0.02 | 0.03 | 0.05 | 0.07 | 0.09 | 0.11 | 0.14 | 0.17 | 0.19 | 0.20 | 0.25 | 0.27 | 0.32 | 0.34 | 0.37 | 0.40 | 0.43 | 0.46 | 0.48 | 0.51 | 0.54 | 0.57 | 0.60 | 0.63 | 0.65 | 0.68 | 0.70 | 0.73 | 0.76 | 0.81 | 0.87 | 0.93 |      |
| CMCC-CM    | 1 | 0.00 | 0.01 | 0.03 | 0.04 | 0.05 | 0.07 | 0.08 | 0.10 | 0.11 | 0.14 | 0.17 | 0.19 | 0.21 | 0.24 | 0.27 | 0.29 | 0.32 | 0.35 | 0.38 | 0.40 | 0.43 | 0.45 | 0.48 | 0.52 | 0.55 | 0.58 | 0.61 | 0.64 | 0.66 | 0.69 | 0.72 | 0.75 | 0.82 | 0.88 | 0.94 |      |
|            | 2 | 0.00 | 0.00 | 0.01 | 0.02 | 0.03 | 0.05 | 0.06 | 0.08 | 0.10 | 0.12 | 0.14 | 0.17 | 0.19 | 0.22 | 0.24 | 0.27 | 0.30 | 0.32 | 0.35 | 0.38 | 0.41 | 0.44 | 0.47 | 0.50 | 0.53 | 0.56 | 0.59 | 0.62 | 0.65 | 0.68 | 0.71 | 0.75 | 0.81 | 0.87 | 0.95 |      |
|            | 3 | 0.00 | 0.00 | 0.01 | 0.02 | 0.03 | 0.04 | 0.06 | 0.07 | 0.09 | 0.10 | 0.12 | 0.13 | 0.15 | 0.17 | 0.19 | 0.21 | 0.23 | 0.26 | 0.29 | 0.32 | 0.35 | 0.38 | 0.42 | 0.45 | 0.48 | 0.52 | 0.55 | 0.58 | 0.62 | 0.65 | 0.68 | 0.72 | 0.78 | 0.86 | 0.93 |      |
|            | 4 | 0.00 | 0.00 | 0.01 | 0.01 | 0.02 | 0.03 | 0.04 | 0.05 | 0.06 | 0.07 | 0.09 | 0.11 | 0.13 | 0.15 | 0.17 | 0.20 | 0.22 | 0.25 | 0.29 | 0.32 | 0.35 | 0.38 | 0.41 | 0.45 | 0.48 | 0.51 | 0.55 | 0.58 | 0.62 | 0.65 | 0.68 | 0.71 | 0.78 | 0.86 | 0.95 |      |
|            | 5 | 0.00 | 0.00 | 0.01 | 0.02 | 0.03 | 0.04 | 0.05 | 0.06 | 0.08 | 0.10 | 0.12 | 0.14 | 0.16 | 0.19 | 0.21 | 0.24 | 0.26 | 0.29 | 0.32 | 0.35 | 0.37 | 0.41 | 0.44 | 0.47 | 0.50 | 0.54 | 0.57 | 0.60 | 0.63 | 0.66 | 0.70 | 0.73 | 0.79 | 0.89 | 0.93 |      |
|            | 6 | 0.00 | 0.00 | 0.01 | 0.02 | 0.03 | 0.04 | 0.05 | 0.07 | 0.08 | 0.10 | 0.12 | 0.14 | 0.16 | 0.18 | 0.21 | 0.23 | 0.26 | 0.28 | 0.31 | 0.34 | 0.37 | 0.40 | 0.44 | 0.47 | 0.50 | 0.53 | 0.57 | 0.60 | 0.63 | 0.67 | 0.70 | 0.73 | 0.79 | 0.87 | 0.96 |      |
| CMCC-CMS   | 1 | 0.00 | 0.01 | 0.02 | 0.03 | 0.04 | 0.05 | 0.07 | 0.08 | 0.10 | 0.12 | 0.15 | 0.17 | 0.20 | 0.22 | 0.25 | 0.28 | 0.31 | 0.34 | 0.37 | 0.39 | 0.42 | 0.45 | 0.47 | 0.50 | 0.53 | 0.56 | 0.58 | 0.61 | 0.64 | 0.66 | 0.69 | 0.76 | 0.82 | 0.88 | 0.94 |      |
|            | 2 | 0.00 | 0.01 | 0.01 | 0.03 | 0.04 | 0.05 | 0.07 | 0.09 | 0.11 | 0.13 | 0.15 | 0.17 | 0.19 | 0.21 | 0.24 | 0.27 | 0.30 | 0.32 | 0.35 | 0.38 | 0.41 | 0.44 | 0.47 | 0.53 | 0.53 | 0.55 | 0.57 | 0.61 | 0.64 | 0.66 | 0.72 | 0.75 | 0.81 | 0.87 | 0.94 |      |
|            | 3 | 0.00 | 0.00 | 0.01 | 0.01 | 0.02 | 0.04 | 0.05 | 0.07 | 0.08 | 0.10 | 0.12 | 0.14 | 0.16 | 0.19 | 0.21 | 0.24 | 0.26 | 0.29 | 0.31 | 0.34 | 0.37 | 0.40 | 0.42 | 0.48 | 0.49 | 0.51 | 0.54 | 0.57 | 0.61 | 0.65 | 0.68 | 0.71 | 0.79 | 0.86 | 0.93 |      |
|            | 4 | 0.00 | 0.00 | 0.01 | 0.02 | 0.03 | 0.05 | 0.06 | 0.07 | 0.08 | 0.10 | 0.12 | 0.14 | 0.16 | 0.18 | 0.20 | 0.23 | 0.25 | 0.28 | 0.31 | 0.33 | 0.36 | 0.39 | 0.42 | 0.45 | 0.48 | 0.52 | 0.54 | 0.56 | 0.61 | 0.66 | 0.69 | 0.73 | 0.79 | 0.86 | 0.93 |      |
|            | 5 | 0.00 | 0.00 | 0.01 | 0.02 | 0.03 | 0.04 | 0.05 | 0.07 | 0.09 | 0.10 | 0.13 | 0.15 | 0.17 | 0.20 | 0.22 | 0.25 | 0.27 | 0.30 | 0.33 | 0.35 | 0.38 | 0.41 | 0.44 | 0.49 | 0.50 | 0.53 | 0.57 | 0.60 | 0.63 | 0.66 | 0.68 | 0.73 | 0.79 | 0.86 | 0.93 |      |
|            | 6 | 0.00 | 0.00 | 0.01 | 0.02 | 0.03 | 0.05 | 0.06 | 0.08 | 0.09 | 0.11 | 0.13 | 0.14 | 0.16 | 0.18 | 0.22 | 0.24 | 0.27 | 0.29 | 0.31 | 0.34 | 0.37 | 0.40 | 0.43 | 0.46 | 0.50 | 0.53 | 0.57 | 0.60 | 0.63 | 0.66 | 0.69 | 0.74 | 0.80 | 0.86 | 0.93 |      |
| CNRM-CM5   | 1 | 0.00 | 0.01 | 0.01 | 0.03 | 0.05 | 0.07 | 0.09 | 0.11 | 0.13 | 0.15 | 0.18 | 0.20 | 0.22 | 0.25 | 0.28 | 0.30 | 0.33 | 0.35 | 0.38 | 0.41 | 0.43 | 0.46 | 0.49 | 0.52 | 0.55 | 0.58 | 0.61 | 0.63 | 0.66 | 0.69 | 0.72 | 0.76 | 0.81 | 0.86 | 0.94 |      |
|            | 2 | 0.00 | 0.00 | 0.01 | 0.02 | 0.04 | 0.06 | 0.08 | 0.10 | 0.12 | 0.14 | 0.16 | 0.18 | 0.21 | 0.23 | 0.25 | 0.28 | 0.30 | 0.33 | 0.36 | 0.39 | 0.41 | 0.44 | 0.47 | 0.50 | 0.53 | 0.56 | 0.60 | 0.63 | 0.66 | 0.68 | 0.71 | 0.74 | 0.79 | 0.85 | 0.94 |      |
|            | 3 | 0.00 | 0.00 | 0.01 | 0.01 | 0.03 | 0.04 | 0.06 | 0.07 | 0.09 | 0.10 | 0.11 | 0.13 | 0.15 | 0.17 | 0.20 | 0.22 | 0.25 | 0.27 | 0.30 | 0.33 | 0.36 | 0.39 | 0.42 | 0.46 | 0.49 | 0.52 | 0.56 | 0.59 | 0.62 | 0.65 | 0.69 | 0.75 | 0.79 | 0.84 | 0.93 |      |
|            | 4 | 0.00 | 0.00 | 0.01 | 0.02 | 0.03 | 0.05 | 0.06 | 0.07 | 0.09 | 0.10 | 0.12 | 0.14 | 0.16 | 0.18 | 0.21 | 0.23 | 0.26 | 0.29 | 0.31 | 0.34 | 0.37 | 0.40 | 0.42 | 0.46 | 0.49 | 0.52 | 0.56 | 0.59 | 0.62 | 0.65 | 0.67 | 0.73 | 0.76 | 0.86 | 0.93 |      |
|            | 5 | 0.00 | 0.00 | 0.01 | 0.03 | 0.04 | 0.05 | 0.07 | 0.08 | 0.10 | 0.12 | 0.14 | 0.16 | 0.19 | 0.21 | 0.23 | 0.25 | 0.27 | 0.30 | 0.32 | 0.35 | 0.38 | 0.41 | 0.44 | 0.47 | 0.51 | 0.54 | 0.57 | 0.60 | 0.64 | 0.67 | 0.70 | 0.75 | 0.79 | 0.86 | 0.93 |      |
|            | 6 | 0.00 | 0.00 | 0.02 | 0.03 | 0.04 | 0.05 | 0.07 | 0.09 | 0.11 | 0.13 | 0.15 | 0.17 | 0.19 | 0.22 | 0.24 | 0.26 | 0.29 | 0.31 | 0.33 | 0.36 | 0.39 | 0.41 | 0.44 | 0.47 | 0.51 | 0.54 | 0.57 | 0.60 | 0.64 | 0.67 | 0.70 | 0.73 | 0.80 | 0.86 | 0.93 |      |
| GFDL-CM3   | 1 | 0.01 | 0.02 | 0.03 | 0.05 | 0.06 | 0.08 | 0.10 | 0.12 | 0.14 | 0.16 | 0.19 | 0.21 | 0.24 | 0.26 | 0.28 | 0.31 | 0.33 | 0.35 | 0.37 | 0.42 | 0.44 | 0.47 | 0.50 | 0.52 | 0.55 | 0.58 | 0.61 | 0.63 | 0.66 | 0.72 | 0.72 | 0.76 | 0.82 | 0.88 | 0.94 |      |
|            | 2 | 0.00 | 0.01 | 0.03 | 0.04 | 0.06 | 0.07 | 0.09 | 0.10 | 0.13 | 0.15 | 0.17 | 0.19 | 0.22 | 0.24 | 0.26 | 0.28 | 0.30 | 0.33 | 0.37 | 0.40 | 0.42 | 0.45 | 0.48 | 0.51 | 0.54 | 0.56 | 0.59 | 0.62 | 0.66 | 0.69 | 0.72 | 0.77 | 0.81 | 0.87 | 0.94 |      |
|            | 3 | 0.00 | 0.01 | 0.02 | 0.03 | 0.05 | 0.07 | 0.08 | 0.10 | 0.11 | 0.12 | 0.14 | 0.16 | 0.18 | 0.20 | 0.21 | 0.24 | 0.26 | 0.29 | 0.31 | 0.33 | 0.36 | 0.38 | 0.41 | 0.47 | 0.50 | 0.53 | 0.56 | 0.60 | 0.63 | 0.67 | 0.70 | 0.73 | 0.80 | 0.86 | 0.93 |      |
|            | 4 | 0.00 | 0.00 | 0.02 | 0.03 | 0.04 | 0.06 | 0.07 | 0.09 | 0.10 | 0.11 | 0.12 | 0.14 | 0.17 | 0.19 | 0.22 | 0.24 | 0.27 | 0.29 | 0.31 | 0.34 | 0.36 | 0.39 | 0.42 | 0.44 | 0.47 | 0.50 | 0.53 | 0.60 | 0.64 | 0.67 | 0.74 | 0.74 | 0.80 | 0.87 | 0.93 |      |
|            | 5 | 0.00 | 0.01 | 0.02 | 0.03 | 0.05 | 0.07 | 0.08 | 0.10 | 0.11 | 0.13 | 0.15 | 0.17 | 0.19 | 0.22 | 0.24 | 0.26 | 0.28 | 0.31 | 0.33 | 0.35 | 0.37 | 0.43 | 0.46 | 0.49 | 0.51 | 0.54 | 0.57 | 0.60 | 0.64 | 0.67 | 0.70 | 0.74 | 0.80 | 0.87 | 0.93 |      |
|            | 6 | 0.00 | 0.01 | 0.02 | 0.03 | 0.05 | 0.06 | 0.08 | 0.09 | 0.11 | 0.12 | 0.14 | 0.16 | 0.19 | 0.21 | 0.24 | 0.26 | 0.29 | 0.31 | 0.34 | 0.37 | 0.39 | 0.41 | 0.44 | 0.47 | 0.49 | 0.51 | 0.54 | 0.60 | 0.64 | 0.67 | 0.70 | 0.74 | 0.80 | 0.87 | 0.93 |      |
| GFDL-ESM2G | 1 | 0.00 | 0.00 | 0.02 | 0.04 | 0.06 | 0.08 | 0.10 | 0.11 | 0.13 | 0.15 | 0.17 | 0.19 | 0.22 | 0.24 | 0.27 | 0.29 | 0.31 | 0.34 | 0.37 | 0.40 | 0.43 | 0.46 | 0.49 | 0.52 | 0.55 | 0.58 | 0.64 | 0.64 | 0.67 | 0.70 | 0.72 | 0.76 | 0.82 | 0.88 | 0.94 |      |
|            | 2 | 0.00 | 0.00 | 0.01 | 0.03 | 0.04 | 0.06 | 0.08 | 0.10 | 0.12 | 0.14 | 0.16 | 0.19 | 0.21 | 0.23 | 0.25 | 0.28 | 0.31 | 0.33 | 0.36 | 0.39 | 0.41 | 0.44 | 0.47 | 0.54 | 0.54 | 0.56 | 0.59 | 0.62 | 0.66 | 0.69 | 0.72 | 0.75 | 0.81 | 0.87 | 0.94 |      |
|            | 3 | 0.00 | 0.00 | 0.00 | 0.02 | 0.03 | 0.05 | 0.06 | 0.08 | 0.09 | 0.11 | 0.13 | 0.15 | 0.17 | 0.19 | 0.21 | 0.24 | 0.26 | 0.29 | 0.32 | 0.35 | 0.38 | 0.41 | 0.43 | 0.47 | 0.51 | 0.53 | 0.56 | 0.59 | 0.62 | 0.66 | 0.69 | 0.72 | 0.79 | 0.86 | 0.93 |      |
|            | 4 | 0.00 | 0.00 | 0.01 | 0.02 | 0.04 | 0.05 | 0.07 | 0.09 | 0.10 | 0.12 | 0.14 | 0.16 | 0.19 | 0.21 | 0.24 | 0.26 | 0.29 | 0.31 | 0.34 | 0.37 | 0.40 | 0.42 | 0.45 | 0.51 | 0.51 | 0.54 | 0.57 | 0.60 | 0.63 | 0.67 | 0.70 | 0.73 | 0.79 | 0.86 | 0.93 |      |
|            | 5 | 0.00 | 0.00 | 0.01 | 0.03 | 0.04 | 0.06 | 0.08 | 0.09 | 0.12 | 0.14 | 0.16 | 0.18 | 0.20 | 0.23 | 0.25 | 0.27 | 0.29 | 0.32 | 0.35 | 0.37 | 0.40 | 0.43 | 0.46 | 0.48 | 0.51 | 0.54 | 0.60 | 0.61 | 0.64 | 0.67 | 0.71 | 0.74 | 0.80 | 0.87 | 0.93 |      |

|              |   |      |      |      |      |      |      |      |      |      |      |      |      |      |      |      |      |      |      |      |      |      |      |      |      |      |      |      |      |      |      |      |      |      |      |      |
|--------------|---|------|------|------|------|------|------|------|------|------|------|------|------|------|------|------|------|------|------|------|------|------|------|------|------|------|------|------|------|------|------|------|------|------|------|------|
|              | 6 | 0.00 | 0.00 | 0.01 | 0.02 | 0.03 | 0.05 | 0.06 | 0.09 | 0.10 | 0.12 | 0.14 | 0.16 | 0.18 | 0.20 | 0.23 | 0.26 | 0.28 | 0.31 | 0.34 | 0.37 | 0.40 | 0.43 | 0.46 | 0.49 | 0.52 | 0.55 | 0.60 | 0.62 | 0.65 | 0.68 | 0.71 | 0.74 | 0.81 | 0.87 | 0.94 |
| GFDL-ESM2M   | 1 | 0.00 | 0.00 | 0.01 | 0.02 | 0.04 | 0.07 | 0.09 | 0.11 | 0.14 | 0.16 | 0.18 | 0.21 | 0.23 | 0.25 | 0.28 | 0.30 | 0.33 | 0.35 | 0.37 | 0.40 | 0.43 | 0.47 | 0.49 | 0.52 | 0.55 | 0.58 | 0.61 | 0.64 | 0.67 | 0.69 | 0.72 | 0.75 | 0.82 | 0.88 | 0.94 |
|              | 2 | 0.00 | 0.00 | 0.00 | 0.02 | 0.03 | 0.05 | 0.07 | 0.09 | 0.10 | 0.13 | 0.15 | 0.18 | 0.20 | 0.23 | 0.25 | 0.28 | 0.31 | 0.34 | 0.37 | 0.39 | 0.42 | 0.45 | 0.48 | 0.51 | 0.54 | 0.56 | 0.59 | 0.62 | 0.65 | 0.68 | 0.72 | 0.75 | 0.81 | 0.87 | 0.94 |
|              | 3 | 0.00 | 0.00 | 0.00 | 0.00 | 0.02 | 0.03 | 0.05 | 0.07 | 0.09 | 0.11 | 0.13 | 0.16 | 0.18 | 0.21 | 0.23 | 0.26 | 0.28 | 0.32 | 0.35 | 0.37 | 0.41 | 0.44 | 0.46 | 0.49 | 0.52 | 0.55 | 0.58 | 0.60 | 0.63 | 0.66 | 0.70 | 0.72 | 0.82 | 0.86 | 0.93 |
|              | 4 | 0.00 | 0.00 | 0.00 | 0.01 | 0.02 | 0.03 | 0.04 | 0.06 | 0.07 | 0.10 | 0.12 | 0.15 | 0.18 | 0.21 | 0.23 | 0.26 | 0.29 | 0.32 | 0.34 | 0.37 | 0.39 | 0.42 | 0.44 | 0.47 | 0.50 | 0.53 | 0.56 | 0.60 | 0.63 | 0.66 | 0.69 | 0.73 | 0.81 | 0.86 | 0.93 |
|              | 5 | 0.00 | 0.00 | 0.00 | 0.01 | 0.01 | 0.02 | 0.04 | 0.06 | 0.09 | 0.12 | 0.14 | 0.17 | 0.20 | 0.23 | 0.25 | 0.28 | 0.30 | 0.32 | 0.34 | 0.36 | 0.38 | 0.45 | 0.48 | 0.51 | 0.54 | 0.56 | 0.59 | 0.62 | 0.65 | 0.68 | 0.71 | 0.74 | 0.81 | 0.87 | 0.94 |
|              | 6 | 0.00 | 0.00 | 0.00 | 0.00 | 0.01 | 0.02 | 0.03 | 0.05 | 0.08 | 0.11 | 0.13 | 0.16 | 0.19 | 0.22 | 0.25 | 0.27 | 0.30 | 0.32 | 0.35 | 0.37 | 0.40 | 0.42 | 0.44 | 0.51 | 0.54 | 0.57 | 0.59 | 0.62 | 0.64 | 0.66 | 0.71 | 0.74 | 0.80 | 0.87 | 0.93 |
| HadGEM2-AO   | 1 | 0.00 | 0.02 | 0.04 | 0.06 | 0.08 | 0.10 | 0.12 | 0.14 | 0.15 | 0.17 | 0.19 | 0.21 | 0.25 | 0.28 | 0.30 | 0.32 | 0.34 | 0.37 | 0.40 | 0.42 | 0.45 | 0.47 | 0.50 | 0.53 | 0.55 | 0.58 | 0.62 | 0.64 | 0.68 | 0.71 | 0.74 | 0.77 | 0.82 | 0.88 | 0.94 |
|              | 2 | 0.00 | 0.01 | 0.03 | 0.04 | 0.06 | 0.08 | 0.11 | 0.13 | 0.15 | 0.18 | 0.20 | 0.23 | 0.28 | 0.29 | 0.31 | 0.34 | 0.37 | 0.39 | 0.42 | 0.44 | 0.47 | 0.50 | 0.52 | 0.55 | 0.57 | 0.60 | 0.63 | 0.65 | 0.68 | 0.71 | 0.73 | 0.76 | 0.81 | 0.88 | 0.94 |
|              | 3 | 0.00 | 0.01 | 0.02 | 0.03 | 0.04 | 0.06 | 0.07 | 0.09 | 0.11 | 0.13 | 0.16 | 0.18 | 0.21 | 0.24 | 0.26 | 0.29 | 0.31 | 0.36 | 0.37 | 0.39 | 0.42 | 0.44 | 0.46 | 0.49 | 0.51 | 0.54 | 0.56 | 0.59 | 0.66 | 0.69 | 0.71 | 0.74 | 0.81 | 0.88 | 0.94 |
|              | 4 | 0.00 | 0.01 | 0.02 | 0.03 | 0.05 | 0.07 | 0.09 | 0.10 | 0.13 | 0.15 | 0.17 | 0.19 | 0.26 | 0.26 | 0.28 | 0.31 | 0.33 | 0.35 | 0.38 | 0.40 | 0.43 | 0.46 | 0.48 | 0.51 | 0.53 | 0.56 | 0.59 | 0.62 | 0.64 | 0.67 | 0.72 | 0.75 | 0.81 | 0.88 | 0.94 |
|              | 5 | 0.01 | 0.02 | 0.03 | 0.04 | 0.06 | 0.07 | 0.09 | 0.11 | 0.13 | 0.14 | 0.16 | 0.18 | 0.20 | 0.23 | 0.25 | 0.28 | 0.31 | 0.36 | 0.37 | 0.40 | 0.42 | 0.45 | 0.48 | 0.51 | 0.54 | 0.56 | 0.59 | 0.62 | 0.65 | 0.68 | 0.71 | 0.74 | 0.81 | 0.87 | 0.93 |
|              | 6 | 0.00 | 0.00 | 0.00 | 0.01 | 0.02 | 0.03 | 0.06 | 0.08 | 0.10 | 0.12 | 0.14 | 0.16 | 0.19 | 0.21 | 0.23 | 0.25 | 0.27 | 0.29 | 0.32 | 0.34 | 0.37 | 0.40 | 0.43 | 0.49 | 0.49 | 0.55 | 0.58 | 0.61 | 0.65 | 0.68 | 0.71 | 0.74 | 0.80 | 0.87 | 0.93 |
| HadGEM2-CC   | 1 | 0.00 | 0.01 | 0.02 | 0.03 | 0.04 | 0.05 | 0.06 | 0.08 | 0.10 | 0.12 | 0.14 | 0.16 | 0.19 | 0.21 | 0.25 | 0.28 | 0.31 | 0.34 | 0.37 | 0.40 | 0.42 | 0.45 | 0.48 | 0.52 | 0.54 | 0.58 | 0.61 | 0.63 | 0.67 | 0.70 | 0.73 | 0.76 | 0.84 | 0.88 | 0.94 |
|              | 2 | 0.00 | 0.00 | 0.01 | 0.02 | 0.03 | 0.05 | 0.06 | 0.08 | 0.09 | 0.11 | 0.13 | 0.15 | 0.18 | 0.21 | 0.24 | 0.26 | 0.29 | 0.32 | 0.35 | 0.38 | 0.41 | 0.44 | 0.47 | 0.50 | 0.53 | 0.56 | 0.59 | 0.62 | 0.66 | 0.69 | 0.72 | 0.75 | 0.81 | 0.87 | 0.94 |
|              | 3 | 0.00 | 0.00 | 0.00 | 0.01 | 0.02 | 0.03 | 0.04 | 0.06 | 0.07 | 0.09 | 0.10 | 0.12 | 0.14 | 0.16 | 0.18 | 0.20 | 0.23 | 0.26 | 0.29 | 0.31 | 0.35 | 0.38 | 0.41 | 0.45 | 0.48 | 0.51 | 0.55 | 0.59 | 0.62 | 0.65 | 0.69 | 0.74 | 0.79 | 0.86 | 0.93 |
|              | 4 | 0.00 | 0.00 | 0.00 | 0.01 | 0.02 | 0.03 | 0.04 | 0.06 | 0.07 | 0.08 | 0.10 | 0.12 | 0.14 | 0.16 | 0.18 | 0.21 | 0.23 | 0.25 | 0.28 | 0.31 | 0.34 | 0.38 | 0.41 | 0.44 | 0.48 | 0.52 | 0.55 | 0.59 | 0.62 | 0.67 | 0.69 | 0.72 | 0.79 | 0.86 | 0.93 |
|              | 5 | 0.00 | 0.00 | 0.01 | 0.02 | 0.03 | 0.04 | 0.06 | 0.07 | 0.08 | 0.10 | 0.12 | 0.14 | 0.17 | 0.19 | 0.21 | 0.23 | 0.25 | 0.28 | 0.31 | 0.34 | 0.37 | 0.40 | 0.43 | 0.47 | 0.50 | 0.55 | 0.57 | 0.60 | 0.64 | 0.67 | 0.70 | 0.73 | 0.80 | 0.86 | 0.93 |
|              | 6 | 0.00 | 0.00 | 0.00 | 0.01 | 0.02 | 0.03 | 0.04 | 0.06 | 0.08 | 0.09 | 0.11 | 0.13 | 0.15 | 0.18 | 0.20 | 0.23 | 0.25 | 0.28 | 0.31 | 0.34 | 0.37 | 0.39 | 0.43 | 0.47 | 0.50 | 0.55 | 0.57 | 0.60 | 0.63 | 0.66 | 0.70 | 0.73 | 0.80 | 0.87 | 0.93 |
| IPSL-CM5A-MR | 1 | 0.00 | 0.01 | 0.02 | 0.04 | 0.05 | 0.07 | 0.10 | 0.12 | 0.14 | 0.16 | 0.18 | 0.20 | 0.22 | 0.25 | 0.27 | 0.30 | 0.32 | 0.34 | 0.38 | 0.40 | 0.43 | 0.46 | 0.48 | 0.52 | 0.55 | 0.58 | 0.61 | 0.64 | 0.68 | 0.70 | 0.73 | 0.76 | 0.82 | 0.88 | 0.94 |
|              | 2 | 0.00 | 0.01 | 0.01 | 0.03 | 0.04 | 0.07 | 0.09 | 0.11 | 0.12 | 0.14 | 0.16 | 0.19 | 0.21 | 0.23 | 0.26 | 0.28 | 0.31 | 0.34 | 0.36 | 0.39 | 0.42 | 0.45 | 0.47 | 0.50 | 0.53 | 0.56 | 0.58 | 0.65 | 0.66 | 0.69 | 0.72 | 0.75 | 0.81 | 0.87 | 0.94 |
|              | 3 | 0.00 | 0.00 | 0.01 | 0.02 | 0.03 | 0.04 | 0.06 | 0.08 | 0.09 | 0.11 | 0.13 | 0.14 | 0.17 | 0.19 | 0.21 | 0.23 | 0.26 | 0.28 | 0.31 | 0.34 | 0.37 | 0.40 | 0.43 | 0.46 | 0.50 | 0.52 | 0.55 | 0.58 | 0.62 | 0.66 | 0.69 | 0.73 | 0.79 | 0.86 | 0.93 |
|              | 4 | 0.00 | 0.00 | 0.01 | 0.02 | 0.03 | 0.04 | 0.06 | 0.07 | 0.09 | 0.11 | 0.13 | 0.15 | 0.17 | 0.19 | 0.22 | 0.24 | 0.26 | 0.29 | 0.31 | 0.34 | 0.36 | 0.40 | 0.43 | 0.46 | 0.49 | 0.52 | 0.56 | 0.59 | 0.64 | 0.66 | 0.69 | 0.72 | 0.79 | 0.86 | 0.93 |
|              | 5 | 0.00 | 0.00 | 0.01 | 0.02 | 0.03 | 0.05 | 0.06 | 0.07 | 0.10 | 0.11 | 0.13 | 0.16 | 0.18 | 0.20 | 0.23 | 0.25 | 0.28 | 0.31 | 0.34 | 0.37 | 0.40 | 0.43 | 0.46 | 0.49 | 0.52 | 0.55 | 0.58 | 0.61 | 0.64 | 0.67 | 0.71 | 0.74 | 0.80 | 0.87 | 0.93 |
|              | 6 | 0.00 | 0.00 | 0.01 | 0.02 | 0.03 | 0.04 | 0.06 | 0.07 | 0.09 | 0.10 | 0.12 | 0.14 | 0.18 | 0.20 | 0.23 | 0.25 | 0.28 | 0.31 | 0.34 | 0.37 | 0.39 | 0.42 | 0.45 | 0.48 | 0.51 | 0.54 | 0.57 | 0.61 | 0.64 | 0.67 | 0.70 | 0.74 | 0.80 | 0.87 | 0.93 |
| MIROC5       | 1 | 0.01 | 0.02 | 0.04 | 0.06 | 0.06 | 0.07 | 0.09 | 0.10 | 0.11 | 0.18 | 0.20 | 0.22 | 0.24 | 0.27 | 0.29 | 0.31 | 0.34 | 0.36 | 0.38 | 0.41 | 0.44 | 0.47 | 0.49 | 0.52 | 0.55 | 0.58 | 0.61 | 0.64 | 0.67 | 0.70 | 0.73 | 0.76 | 0.82 | 0.88 | 0.96 |
|              | 2 | 0.00 | 0.01 | 0.02 | 0.04 | 0.05 | 0.06 | 0.07 | 0.08 | 0.10 | 0.12 | 0.14 | 0.16 | 0.17 | 0.19 | 0.26 | 0.29 | 0.31 | 0.33 | 0.36 | 0.39 | 0.42 | 0.45 | 0.48 | 0.50 | 0.53 | 0.56 | 0.60 | 0.63 | 0.66 | 0.69 | 0.72 | 0.75 | 0.81 | 0.87 | 0.95 |
|              | 3 | 0.00 | 0.01 | 0.01 | 0.02 | 0.03 | 0.04 | 0.06 | 0.07 | 0.09 | 0.11 | 0.12 | 0.14 | 0.16 | 0.18 | 0.20 | 0.22 | 0.29 | 0.31 | 0.34 | 0.36 | 0.38 | 0.41 | 0.44 | 0.48 | 0.51 | 0.54 | 0.57 | 0.60 | 0.63 | 0.66 | 0.70 | 0.73 | 0.80 | 0.86 | 0.93 |
|              | 4 | 0.00 | 0.00 | 0.01 | 0.01 | 0.02 | 0.03 | 0.05 | 0.06 | 0.08 | 0.10 | 0.12 | 0.13 | 0.15 | 0.21 | 0.23 | 0.26 | 0.29 | 0.31 | 0.34 | 0.36 | 0.39 | 0.42 | 0.45 | 0.47 | 0.50 | 0.53 | 0.56 | 0.59 | 0.63 | 0.66 | 0.69 | 0.72 | 0.79 | 0.86 | 0.94 |



|            |   |      |      |      |      |      |      |      |      |      |      |      |      |      |      |      |      |      |      |      |      |      |      |      |      |      |      |      |      |      |      |      |      |      |      |      |
|------------|---|------|------|------|------|------|------|------|------|------|------|------|------|------|------|------|------|------|------|------|------|------|------|------|------|------|------|------|------|------|------|------|------|------|------|------|
|            | 5 | 0.00 | 0.00 | 0.01 | 0.02 | 0.03 | 0.04 | 0.06 | 0.07 | 0.09 | 0.12 | 0.14 | 0.16 | 0.18 | 0.19 | 0.21 | 0.27 | 0.30 | 0.33 | 0.36 | 0.38 | 0.41 | 0.44 | 0.46 | 0.49 | 0.52 | 0.55 | 0.58 | 0.61 | 0.64 | 0.68 | 0.71 | 0.74 | 0.80 | 0.86 | 0.95 |
|            | 6 | 0.00 | 0.00 | 0.01 | 0.02 | 0.03 | 0.04 | 0.06 | 0.07 | 0.08 | 0.09 | 0.14 | 0.16 | 0.20 | 0.23 | 0.25 | 0.27 | 0.30 | 0.32 | 0.35 | 0.37 | 0.40 | 0.43 | 0.45 | 0.48 | 0.51 | 0.54 | 0.57 | 0.61 | 0.64 | 0.67 | 0.70 | 0.74 | 0.80 | 0.87 | 0.93 |
| MPI-ESM-LR | 1 | 0.00 | 0.00 | 0.01 | 0.02 | 0.03 | 0.05 | 0.07 | 0.10 | 0.12 | 0.13 | 0.16 | 0.18 | 0.21 | 0.23 | 0.26 | 0.29 | 0.31 | 0.34 | 0.37 | 0.40 | 0.43 | 0.45 | 0.48 | 0.51 | 0.54 | 0.57 | 0.60 | 0.64 | 0.67 | 0.70 | 0.73 | 0.76 | 0.82 | 0.88 | 0.93 |
|            | 2 | 0.00 | 0.00 | 0.00 | 0.01 | 0.02 | 0.04 | 0.05 | 0.08 | 0.09 | 0.11 | 0.14 | 0.16 | 0.19 | 0.21 | 0.24 | 0.27 | 0.29 | 0.32 | 0.35 | 0.38 | 0.41 | 0.44 | 0.47 | 0.50 | 0.53 | 0.56 | 0.59 | 0.62 | 0.65 | 0.69 | 0.72 | 0.76 | 0.81 | 0.87 | 0.93 |
|            | 3 | 0.00 | 0.00 | 0.00 | 0.01 | 0.02 | 0.03 | 0.05 | 0.06 | 0.08 | 0.10 | 0.11 | 0.13 | 0.15 | 0.17 | 0.20 | 0.22 | 0.25 | 0.27 | 0.30 | 0.33 | 0.36 | 0.39 | 0.42 | 0.45 | 0.48 | 0.52 | 0.55 | 0.58 | 0.61 | 0.65 | 0.70 | 0.71 | 0.77 | 0.86 | 0.93 |
|            | 4 | 0.00 | 0.00 | 0.00 | 0.01 | 0.02 | 0.04 | 0.05 | 0.06 | 0.08 | 0.09 | 0.11 | 0.13 | 0.16 | 0.18 | 0.21 | 0.24 | 0.26 | 0.29 | 0.31 | 0.34 | 0.37 | 0.40 | 0.43 | 0.46 | 0.49 | 0.52 | 0.55 | 0.61 | 0.62 | 0.65 | 0.67 | 0.69 | 0.78 | 0.84 | 0.93 |
|            | 5 | 0.00 | 0.00 | 0.00 | 0.01 | 0.03 | 0.05 | 0.07 | 0.08 | 0.10 | 0.12 | 0.14 | 0.15 | 0.17 | 0.19 | 0.22 | 0.24 | 0.27 | 0.29 | 0.32 | 0.35 | 0.38 | 0.41 | 0.44 | 0.47 | 0.50 | 0.54 | 0.57 | 0.61 | 0.63 | 0.66 | 0.69 | 0.72 | 0.78 | 0.83 | 0.93 |
|            | 6 | 0.00 | 0.00 | 0.00 | 0.01 | 0.02 | 0.02 | 0.03 | 0.04 | 0.08 | 0.10 | 0.11 | 0.13 | 0.15 | 0.16 | 0.19 | 0.23 | 0.26 | 0.28 | 0.31 | 0.34 | 0.37 | 0.41 | 0.44 | 0.47 | 0.50 | 0.53 | 0.57 | 0.60 | 0.62 | 0.65 | 0.68 | 0.73 | 0.79 | 0.87 | 0.93 |
| MPI-ESM-MR | 1 | 0.00 | 0.00 | 0.02 | 0.03 | 0.05 | 0.08 | 0.09 | 0.11 | 0.13 | 0.15 | 0.17 | 0.19 | 0.21 | 0.24 | 0.26 | 0.29 | 0.32 | 0.34 | 0.37 | 0.40 | 0.43 | 0.46 | 0.49 | 0.52 | 0.58 | 0.58 | 0.61 | 0.64 | 0.67 | 0.70 | 0.73 | 0.76 | 0.82 | 0.88 | 0.94 |
|            | 2 | 0.00 | 0.00 | 0.01 | 0.03 | 0.04 | 0.06 | 0.07 | 0.09 | 0.11 | 0.13 | 0.16 | 0.18 | 0.20 | 0.22 | 0.25 | 0.27 | 0.30 | 0.33 | 0.36 | 0.38 | 0.41 | 0.44 | 0.48 | 0.51 | 0.54 | 0.57 | 0.59 | 0.61 | 0.64 | 0.69 | 0.75 | 0.75 | 0.81 | 0.87 | 0.94 |
|            | 3 | 0.00 | 0.00 | 0.01 | 0.02 | 0.03 | 0.04 | 0.06 | 0.07 | 0.09 | 0.11 | 0.13 | 0.15 | 0.17 | 0.20 | 0.22 | 0.24 | 0.26 | 0.28 | 0.31 | 0.34 | 0.37 | 0.40 | 0.43 | 0.46 | 0.49 | 0.54 | 0.56 | 0.59 | 0.62 | 0.66 | 0.69 | 0.72 | 0.79 | 0.86 | 0.93 |
|            | 4 | 0.00 | 0.00 | 0.01 | 0.02 | 0.04 | 0.05 | 0.07 | 0.09 | 0.11 | 0.12 | 0.14 | 0.16 | 0.18 | 0.20 | 0.22 | 0.24 | 0.26 | 0.29 | 0.31 | 0.34 | 0.37 | 0.40 | 0.43 | 0.46 | 0.49 | 0.53 | 0.56 | 0.59 | 0.63 | 0.66 | 0.69 | 0.75 | 0.79 | 0.86 | 0.93 |
|            | 5 | 0.00 | 0.00 | 0.01 | 0.02 | 0.03 | 0.05 | 0.06 | 0.08 | 0.10 | 0.11 | 0.13 | 0.15 | 0.17 | 0.20 | 0.22 | 0.24 | 0.27 | 0.29 | 0.32 | 0.35 | 0.38 | 0.41 | 0.44 | 0.47 | 0.51 | 0.54 | 0.57 | 0.60 | 0.63 | 0.68 | 0.70 | 0.73 | 0.80 | 0.87 | 0.93 |
|            | 6 | 0.00 | 0.00 | 0.02 | 0.04 | 0.06 | 0.08 | 0.09 | 0.10 | 0.11 | 0.13 | 0.15 | 0.17 | 0.19 | 0.21 | 0.23 | 0.26 | 0.28 | 0.31 | 0.34 | 0.36 | 0.39 | 0.42 | 0.45 | 0.47 | 0.52 | 0.54 | 0.57 | 0.60 | 0.63 | 0.67 | 0.70 | 0.73 | 0.80 | 0.87 | 0.93 |
| MPI-ESM-P  | 1 | 0.00 | 0.00 | 0.01 | 0.02 | 0.04 | 0.06 | 0.07 | 0.10 | 0.12 | 0.14 | 0.17 | 0.19 | 0.21 | 0.24 | 0.27 | 0.29 | 0.32 | 0.35 | 0.38 | 0.40 | 0.43 | 0.46 | 0.49 | 0.52 | 0.55 | 0.58 | 0.60 | 0.63 | 0.67 | 0.72 | 0.73 | 0.76 | 0.81 | 0.87 | 0.94 |
|            | 2 | 0.00 | 0.00 | 0.00 | 0.01 | 0.01 | 0.02 | 0.06 | 0.08 | 0.11 | 0.13 | 0.15 | 0.18 | 0.20 | 0.23 | 0.25 | 0.28 | 0.30 | 0.33 | 0.35 | 0.38 | 0.41 | 0.44 | 0.47 | 0.50 | 0.53 | 0.55 | 0.59 | 0.62 | 0.66 | 0.68 | 0.71 | 0.75 | 0.81 | 0.87 | 0.94 |
|            | 3 | 0.00 | 0.00 | 0.00 | 0.00 | 0.01 | 0.03 | 0.05 | 0.06 | 0.08 | 0.09 | 0.11 | 0.12 | 0.14 | 0.17 | 0.20 | 0.22 | 0.24 | 0.27 | 0.30 | 0.32 | 0.35 | 0.38 | 0.41 | 0.44 | 0.48 | 0.52 | 0.55 | 0.59 | 0.62 | 0.66 | 0.69 | 0.73 | 0.79 | 0.86 | 0.92 |
|            | 4 | 0.00 | 0.00 | 0.01 | 0.02 | 0.04 | 0.05 | 0.07 | 0.08 | 0.10 | 0.11 | 0.13 | 0.14 | 0.16 | 0.18 | 0.22 | 0.24 | 0.26 | 0.28 | 0.31 | 0.33 | 0.37 | 0.40 | 0.43 | 0.46 | 0.49 | 0.53 | 0.56 | 0.59 | 0.63 | 0.66 | 0.70 | 0.73 | 0.80 | 0.87 | 0.93 |
|            | 5 | 0.00 | 0.00 | 0.00 | 0.01 | 0.04 | 0.06 | 0.07 | 0.08 | 0.09 | 0.11 | 0.12 | 0.14 | 0.16 | 0.21 | 0.23 | 0.25 | 0.27 | 0.30 | 0.33 | 0.36 | 0.39 | 0.42 | 0.45 | 0.48 | 0.51 | 0.54 | 0.57 | 0.60 | 0.64 | 0.67 | 0.70 | 0.73 | 0.83 | 0.86 | 0.93 |
|            | 6 | 0.00 | 0.00 | 0.01 | 0.02 | 0.05 | 0.06 | 0.08 | 0.09 | 0.10 | 0.11 | 0.14 | 0.16 | 0.18 | 0.20 | 0.23 | 0.25 | 0.27 | 0.30 | 0.33 | 0.36 | 0.39 | 0.41 | 0.44 | 0.48 | 0.51 | 0.54 | 0.57 | 0.60 | 0.64 | 0.67 | 0.70 | 0.76 | 0.80 | 0.87 | 0.93 |
| MRI-CGCM3  | 1 | 0.02 | 0.03 | 0.05 | 0.06 | 0.08 | 0.10 | 0.11 | 0.13 | 0.16 | 0.18 | 0.20 | 0.22 | 0.24 | 0.26 | 0.29 | 0.31 | 0.34 | 0.36 | 0.39 | 0.42 | 0.44 | 0.47 | 0.50 | 0.53 | 0.56 | 0.58 | 0.61 | 0.64 | 0.66 | 0.69 | 0.72 | 0.75 | 0.82 | 0.88 | 0.94 |
|            | 2 | 0.01 | 0.02 | 0.03 | 0.04 | 0.06 | 0.08 | 0.09 | 0.12 | 0.14 | 0.16 | 0.17 | 0.19 | 0.22 | 0.24 | 0.26 | 0.29 | 0.31 | 0.34 | 0.37 | 0.39 | 0.41 | 0.44 | 0.48 | 0.51 | 0.57 | 0.57 | 0.60 | 0.63 | 0.66 | 0.69 | 0.72 | 0.75 | 0.81 | 0.88 | 0.94 |
|            | 3 | 0.01 | 0.01 | 0.02 | 0.03 | 0.04 | 0.06 | 0.07 | 0.09 | 0.12 | 0.14 | 0.16 | 0.18 | 0.20 | 0.22 | 0.25 | 0.27 | 0.29 | 0.32 | 0.34 | 0.37 | 0.41 | 0.44 | 0.47 | 0.50 | 0.53 | 0.56 | 0.60 | 0.64 | 0.66 | 0.69 | 0.72 | 0.75 | 0.81 | 0.87 | 0.93 |
|            | 4 | 0.00 | 0.01 | 0.02 | 0.03 | 0.04 | 0.06 | 0.07 | 0.09 | 0.10 | 0.12 | 0.14 | 0.17 | 0.19 | 0.21 | 0.24 | 0.26 | 0.29 | 0.32 | 0.35 | 0.38 | 0.41 | 0.44 | 0.47 | 0.53 | 0.53 | 0.56 | 0.59 | 0.62 | 0.64 | 0.68 | 0.71 | 0.74 | 0.80 | 0.86 | 0.93 |
|            | 5 | 0.00 | 0.01 | 0.02 | 0.04 | 0.05 | 0.07 | 0.09 | 0.11 | 0.13 | 0.16 | 0.18 | 0.20 | 0.23 | 0.25 | 0.28 | 0.30 | 0.33 | 0.35 | 0.39 | 0.41 | 0.44 | 0.46 | 0.49 | 0.52 | 0.54 | 0.57 | 0.60 | 0.63 | 0.66 | 0.69 | 0.72 | 0.75 | 0.81 | 0.87 | 0.93 |
|            | 6 | 0.00 | 0.01 | 0.02 | 0.03 | 0.05 | 0.07 | 0.09 | 0.11 | 0.13 | 0.15 | 0.17 | 0.19 | 0.22 | 0.24 | 0.27 | 0.32 | 0.33 | 0.36 | 0.38 | 0.41 | 0.43 | 0.46 | 0.49 | 0.51 | 0.55 | 0.57 | 0.61 | 0.63 | 0.66 | 0.69 | 0.72 | 0.75 | 0.80 | 0.87 | 0.93 |
| MRI-ESM1   | 1 | 0.01 | 0.03 | 0.04 | 0.06 | 0.08 | 0.10 | 0.12 | 0.14 | 0.16 | 0.18 | 0.20 | 0.22 | 0.24 | 0.27 | 0.29 | 0.32 | 0.34 | 0.37 | 0.40 | 0.42 | 0.45 | 0.48 | 0.50 | 0.56 | 0.56 | 0.58 | 0.61 | 0.63 | 0.66 | 0.70 | 0.73 | 0.76 | 0.82 | 0.88 | 0.94 |
|            | 2 | 0.01 | 0.02 | 0.03 | 0.05 | 0.07 | 0.09 | 0.10 | 0.12 | 0.13 | 0.16 | 0.18 | 0.20 | 0.23 | 0.25 | 0.27 | 0.30 | 0.33 | 0.35 | 0.38 | 0.40 | 0.43 | 0.46 | 0.49 | 0.52 | 0.54 | 0.57 | 0.63 | 0.63 | 0.66 | 0.69 | 0.72 | 0.74 | 0.81 | 0.87 | 0.94 |
|            | 3 | 0.01 | 0.02 | 0.03 | 0.04 | 0.06 | 0.08 | 0.10 | 0.12 | 0.13 | 0.15 | 0.17 | 0.19 | 0.21 | 0.23 | 0.25 | 0.28 | 0.30 | 0.32 | 0.35 | 0.38 | 0.40 | 0.47 | 0.47 | 0.50 | 0.53 | 0.56 | 0.58 | 0.61 | 0.64 | 0.67 | 0.69 | 0.72 | 0.79 | 0.87 | 0.93 |
|            | 4 | 0.00 | 0.01 | 0.02 | 0.03 | 0.05 | 0.06 | 0.08 | 0.09 | 0.11 | 0.13 | 0.16 | 0.18 | 0.20 | 0.22 | 0.24 | 0.27 | 0.33 | 0.34 | 0.37 | 0.40 | 0.42 | 0.45 | 0.48 | 0.50 | 0.53 | 0.56 | 0.59 | 0.62 | 0.65 | 0.68 | 0.71 | 0.74 | 0.80 | 0.87 | 0.93 |
|            | 5 | 0.00 | 0.01 | 0.02 | 0.04 | 0.06 | 0.08 | 0.10 | 0.12 | 0.14 | 0.16 | 0.18 | 0.20 | 0.22 | 0.25 | 0.27 | 0.29 | 0.31 | 0.34 | 0.36 | 0.40 | 0.43 | 0.46 | 0.51 | 0.52 | 0.55 | 0.57 | 0.60 | 0.63 | 0.65 | 0.68 | 0.72 | 0.74 | 0.81 | 0.87 | 0.93 |

|           |   |      |      |      |      |      |      |      |      |      |      |      |      |      |      |      |      |      |      |      |      |      |      |      |      |      |      |      |      |      |      |      |      |      |      |      |
|-----------|---|------|------|------|------|------|------|------|------|------|------|------|------|------|------|------|------|------|------|------|------|------|------|------|------|------|------|------|------|------|------|------|------|------|------|------|
| NorESM1-M | 6 | 0.00 | 0.01 | 0.02 | 0.03 | 0.05 | 0.07 | 0.08 | 0.11 | 0.13 | 0.15 | 0.17 | 0.19 | 0.21 | 0.23 | 0.26 | 0.28 | 0.31 | 0.33 | 0.36 | 0.39 | 0.43 | 0.45 | 0.47 | 0.50 | 0.53 | 0.56 | 0.59 | 0.62 | 0.65 | 0.68 | 0.71 | 0.74 | 0.80 | 0.87 | 0.93 |
|           | 1 | 0.00 | 0.00 | 0.02 | 0.03 | 0.04 | 0.06 | 0.10 | 0.11 | 0.14 | 0.16 | 0.18 | 0.22 | 0.25 | 0.27 | 0.31 | 0.34 | 0.36 | 0.39 | 0.42 | 0.44 | 0.47 | 0.49 | 0.52 | 0.55 | 0.57 | 0.60 | 0.63 | 0.66 | 0.68 | 0.71 | 0.74 | 0.77 | 0.82 | 0.88 | 0.94 |
|           | 2 | 0.00 | 0.00 | 0.00 | 0.01 | 0.02 | 0.04 | 0.08 | 0.10 | 0.11 | 0.14 | 0.16 | 0.20 | 0.24 | 0.26 | 0.29 | 0.32 | 0.35 | 0.38 | 0.41 | 0.43 | 0.45 | 0.48 | 0.50 | 0.53 | 0.56 | 0.59 | 0.62 | 0.64 | 0.67 | 0.70 | 0.73 | 0.76 | 0.82 | 0.88 | 0.94 |
|           | 3 | 0.00 | 0.00 | 0.00 | 0.01 | 0.02 | 0.03 | 0.06 | 0.07 | 0.10 | 0.14 | 0.16 | 0.20 | 0.22 | 0.25 | 0.27 | 0.29 | 0.31 | 0.34 | 0.36 | 0.39 | 0.42 | 0.44 | 0.47 | 0.50 | 0.53 | 0.56 | 0.59 | 0.62 | 0.65 | 0.68 | 0.71 | 0.74 | 0.80 | 0.87 | 0.93 |
|           | 4 | 0.00 | 0.00 | 0.00 | 0.01 | 0.01 | 0.02 | 0.03 | 0.05 | 0.09 | 0.10 | 0.12 | 0.14 | 0.20 | 0.24 | 0.27 | 0.30 | 0.32 | 0.35 | 0.37 | 0.40 | 0.43 | 0.46 | 0.49 | 0.51 | 0.54 | 0.56 | 0.59 | 0.63 | 0.66 | 0.69 | 0.72 | 0.75 | 0.81 | 0.87 | 0.93 |
|           | 5 | 0.00 | 0.00 | 0.00 | 0.00 | 0.02 | 0.04 | 0.07 | 0.09 | 0.11 | 0.13 | 0.16 | 0.18 | 0.20 | 0.22 | 0.25 | 0.27 | 0.31 | 0.34 | 0.38 | 0.41 | 0.43 | 0.46 | 0.49 | 0.51 | 0.53 | 0.57 | 0.60 | 0.63 | 0.66 | 0.69 | 0.72 | 0.75 | 0.81 | 0.87 | 0.93 |
|           | 6 | 0.00 | 0.00 | 0.01 | 0.02 | 0.03 | 0.05 | 0.06 | 0.08 | 0.11 | 0.13 | 0.16 | 0.19 | 0.21 | 0.24 | 0.27 | 0.29 | 0.32 | 0.34 | 0.36 | 0.39 | 0.42 | 0.45 | 0.47 | 0.50 | 0.53 | 0.56 | 0.59 | 0.62 | 0.65 | 0.67 | 0.70 | 0.72 | 0.79 | 0.87 | 0.93 |



**Table S3.** True positive rates (TPR) in case of each CP map associated with the percentile values between 2.5 and 95. Numbers in the 2<sup>nd</sup> column indicate the analyzed time periods similarly to Table S1. The reference CP maps obtained from the ERA-20C are associated with the following percentiles: 17.5% (in period 1); 20% (2); 27.5% (3, 4); 25% (5, 6).

|              |   | 2.5  | 5    | 7.5  | 10   | 12.5 | 15   | 17.5 | 20   | 22.5 | 25   | 27.5 | 30   | 32.5 | 35   | 37.5 | 40   | 42.5 | 45   | 47.5 | 50   | 52.5 | 55   | 57.5 | 60   | 62.5 | 65   | 67.5 | 70   | 72.5 | 75   | 77.5 | 80   | 85   | 90   | 95   |      |
|--------------|---|------|------|------|------|------|------|------|------|------|------|------|------|------|------|------|------|------|------|------|------|------|------|------|------|------|------|------|------|------|------|------|------|------|------|------|------|
| ERA-20C      | 1 | 0.14 | 0.29 | 0.43 | 0.56 | 0.69 | 0.82 | 1.00 | 1.00 | 1.00 | 1.00 | 1.00 | 1.00 | 1.00 | 1.00 | 1.00 | 1.00 | 1.00 | 1.00 | 1.00 | 1.00 | 1.00 | 1.00 | 1.00 | 1.00 | 1.00 | 1.00 | 1.00 | 1.00 | 1.00 | 1.00 | 1.00 | 1.00 | 1.00 | 1.00 | 1.00 |      |
|              | 2 | 0.13 | 0.25 | 0.38 | 0.50 | 0.62 | 0.75 | 0.87 | 1.00 | 1.00 | 1.00 | 1.00 | 1.00 | 1.00 | 1.00 | 1.00 | 1.00 | 1.00 | 1.00 | 1.00 | 1.00 | 1.00 | 1.00 | 1.00 | 1.00 | 1.00 | 1.00 | 1.00 | 1.00 | 1.00 | 1.00 | 1.00 | 1.00 | 1.00 | 1.00 | 1.00 |      |
|              | 3 | 0.09 | 0.18 | 0.26 | 0.35 | 0.45 | 0.55 | 0.64 | 0.73 | 0.82 | 0.91 | 1.00 | 1.00 | 1.00 | 1.00 | 1.00 | 1.00 | 1.00 | 1.00 | 1.00 | 1.00 | 1.00 | 1.00 | 1.00 | 1.00 | 1.00 | 1.00 | 1.00 | 1.00 | 1.00 | 1.00 | 1.00 | 1.00 | 1.00 | 1.00 | 1.00 |      |
|              | 4 | 0.09 | 0.18 | 0.27 | 0.35 | 0.43 | 0.52 | 0.60 | 0.68 | 0.76 | 0.86 | 1.00 | 1.00 | 1.00 | 1.00 | 1.00 | 1.00 | 1.00 | 1.00 | 1.00 | 1.00 | 1.00 | 1.00 | 1.00 | 1.00 | 1.00 | 1.00 | 1.00 | 1.00 | 1.00 | 1.00 | 1.00 | 1.00 | 1.00 | 1.00 | 1.00 |      |
|              | 5 | 0.10 | 0.20 | 0.31 | 0.40 | 0.49 | 0.59 | 0.69 | 0.78 | 0.87 | 1.00 | 1.00 | 1.00 | 1.00 | 1.00 | 1.00 | 1.00 | 1.00 | 1.00 | 1.00 | 1.00 | 1.00 | 1.00 | 1.00 | 1.00 | 1.00 | 1.00 | 1.00 | 1.00 | 1.00 | 1.00 | 1.00 | 1.00 | 1.00 | 1.00 | 1.00 |      |
|              | 6 | 0.10 | 0.20 | 0.30 | 0.40 | 0.50 | 0.59 | 0.69 | 0.78 | 0.87 | 1.00 | 1.00 | 1.00 | 1.00 | 1.00 | 1.00 | 1.00 | 1.00 | 1.00 | 1.00 | 1.00 | 1.00 | 1.00 | 1.00 | 1.00 | 1.00 | 1.00 | 1.00 | 1.00 | 1.00 | 1.00 | 1.00 | 1.00 | 1.00 | 1.00 | 1.00 | 1.00 |
| NCEP/NCAR R1 | 1 | 0.14 | 0.29 | 0.42 | 0.54 | 0.65 | 0.75 | 0.86 | 0.91 | 0.94 | 0.96 | 0.98 | 0.99 | 1.00 | 1.00 | 1.00 | 1.00 | 1.00 | 1.00 | 1.00 | 1.00 | 1.00 | 1.00 | 1.00 | 1.00 | 1.00 | 1.00 | 1.00 | 1.00 | 1.00 | 1.00 | 1.00 | 1.00 | 1.00 | 1.00 | 1.00 | 1.00 |
|              | 2 | 0.13 | 0.25 | 0.38 | 0.49 | 0.60 | 0.71 | 0.79 | 0.86 | 0.91 | 0.94 | 0.96 | 0.97 | 0.98 | 0.99 | 1.00 | 1.00 | 1.00 | 1.00 | 1.00 | 1.00 | 1.00 | 1.00 | 1.00 | 1.00 | 1.00 | 1.00 | 1.00 | 1.00 | 1.00 | 1.00 | 1.00 | 1.00 | 1.00 | 1.00 | 1.00 | 1.00 |
|              | 3 | 0.09 | 0.18 | 0.26 | 0.34 | 0.43 | 0.51 | 0.59 | 0.66 | 0.72 | 0.77 | 0.81 | 0.84 | 0.90 | 0.98 | 0.98 | 0.99 | 0.99 | 0.99 | 0.99 | 1.00 | 1.00 | 1.00 | 1.00 | 1.00 | 1.00 | 1.00 | 1.00 | 1.00 | 1.00 | 1.00 | 1.00 | 1.00 | 1.00 | 1.00 | 1.00 | 1.00 |
|              | 4 | 0.09 | 0.18 | 0.26 | 0.35 | 0.43 | 0.52 | 0.60 | 0.67 | 0.73 | 0.86 | 0.91 | 0.94 | 0.96 | 0.98 | 0.99 | 1.00 | 1.00 | 1.00 | 1.00 | 1.00 | 1.00 | 1.00 | 1.00 | 1.00 | 1.00 | 1.00 | 1.00 | 1.00 | 1.00 | 1.00 | 1.00 | 1.00 | 1.00 | 1.00 | 1.00 | 1.00 |
|              | 5 | 0.10 | 0.20 | 0.30 | 0.39 | 0.49 | 0.58 | 0.67 | 0.75 | 0.82 | 0.87 | 0.91 | 0.98 | 0.99 | 0.99 | 1.00 | 1.00 | 1.00 | 1.00 | 1.00 | 1.00 | 1.00 | 1.00 | 1.00 | 1.00 | 1.00 | 1.00 | 1.00 | 1.00 | 1.00 | 1.00 | 1.00 | 1.00 | 1.00 | 1.00 | 1.00 | 1.00 |
|              | 6 | 0.10 | 0.20 | 0.30 | 0.40 | 0.49 | 0.59 | 0.68 | 0.77 | 0.85 | 0.91 | 0.94 | 1.00 | 1.00 | 1.00 | 1.00 | 1.00 | 1.00 | 1.00 | 1.00 | 1.00 | 1.00 | 1.00 | 1.00 | 1.00 | 1.00 | 1.00 | 1.00 | 1.00 | 1.00 | 1.00 | 1.00 | 1.00 | 1.00 | 1.00 | 1.00 | 1.00 |
| ACCESS1-0    | 1 | 0.13 | 0.22 | 0.34 | 0.43 | 0.51 | 0.59 | 0.65 | 0.71 | 0.76 | 0.80 | 0.82 | 0.87 | 0.89 | 0.91 | 0.92 | 0.94 | 0.95 | 0.97 | 0.98 | 0.99 | 1.00 | 1.00 | 1.00 | 1.00 | 1.00 | 1.00 | 1.00 | 1.00 | 1.00 | 1.00 | 1.00 | 1.00 | 1.00 | 1.00 | 1.00 | 1.00 |
|              | 2 | 0.13 | 0.24 | 0.35 | 0.44 | 0.51 | 0.57 | 0.63 | 0.68 | 0.72 | 0.76 | 0.79 | 0.81 | 0.83 | 0.85 | 0.91 | 0.93 | 0.95 | 0.98 | 0.99 | 0.99 | 0.99 | 1.00 | 1.00 | 1.00 | 1.00 | 1.00 | 1.00 | 1.00 | 1.00 | 1.00 | 1.00 | 1.00 | 1.00 | 1.00 | 1.00 | 1.00 |
|              | 3 | 0.09 | 0.18 | 0.26 | 0.32 | 0.40 | 0.45 | 0.49 | 0.54 | 0.59 | 0.63 | 0.69 | 0.73 | 0.80 | 0.85 | 0.89 | 0.91 | 0.93 | 0.96 | 0.98 | 0.99 | 0.99 | 1.00 | 1.00 | 1.00 | 1.00 | 1.00 | 1.00 | 1.00 | 1.00 | 1.00 | 1.00 | 1.00 | 1.00 | 1.00 | 1.00 | 1.00 |
|              | 4 | 0.09 | 0.18 | 0.26 | 0.34 | 0.40 | 0.46 | 0.51 | 0.55 | 0.59 | 0.64 | 0.68 | 0.75 | 0.78 | 0.83 | 0.86 | 0.89 | 0.91 | 0.92 | 0.95 | 0.96 | 0.98 | 0.98 | 0.99 | 0.99 | 0.99 | 1.00 | 1.00 | 1.00 | 1.00 | 1.00 | 1.00 | 1.00 | 1.00 | 1.00 | 1.00 |      |
|              | 5 | 0.10 | 0.20 | 0.28 | 0.35 | 0.41 | 0.45 | 0.49 | 0.52 | 0.55 | 0.57 | 0.59 | 0.66 | 0.70 | 0.74 | 0.78 | 0.81 | 0.85 | 0.88 | 0.91 | 0.94 | 0.96 | 0.97 | 0.97 | 0.98 | 0.99 | 0.99 | 0.99 | 1.00 | 1.00 | 1.00 | 1.00 | 1.00 | 1.00 | 1.00 | 1.00 |      |
|              | 6 | 0.10 | 0.20 | 0.30 | 0.36 | 0.42 | 0.46 | 0.51 | 0.55 | 0.59 | 0.64 | 0.68 | 0.75 | 0.78 | 0.82 | 0.86 | 0.88 | 0.90 | 0.93 | 0.95 | 0.97 | 0.98 | 0.98 | 0.99 | 0.99 | 0.99 | 1.00 | 1.00 | 1.00 | 1.00 | 1.00 | 1.00 | 1.00 | 1.00 | 1.00 | 1.00 |      |
| ACCESS1-3    | 1 | 0.12 | 0.23 | 0.31 | 0.40 | 0.46 | 0.52 | 0.58 | 0.62 | 0.65 | 0.68 | 0.71 | 0.74 | 0.76 | 0.78 | 0.81 | 0.85 | 0.87 | 0.89 | 0.91 | 0.94 | 0.95 | 0.95 | 0.96 | 0.97 | 0.97 | 0.97 | 0.98 | 0.98 | 0.98 | 0.99 | 0.99 | 0.99 | 0.99 | 1.00 | 1.00 |      |
|              | 2 | 0.12 | 0.22 | 0.30 | 0.38 | 0.45 | 0.52 | 0.58 | 0.62 | 0.67 | 0.70 | 0.73 | 0.75 | 0.78 | 0.81 | 0.83 | 0.85 | 0.86 | 0.90 | 0.91 | 0.93 | 0.95 | 0.96 | 0.97 | 0.98 | 0.98 | 0.98 | 0.99 | 0.99 | 1.00 | 1.00 | 1.00 | 1.00 | 1.00 | 1.00 | 1.00 |      |
|              | 3 | 0.09 | 0.17 | 0.24 | 0.30 | 0.36 | 0.42 | 0.48 | 0.54 | 0.59 | 0.62 | 0.67 | 0.71 | 0.76 | 0.80 | 0.84 | 0.87 | 0.89 | 0.91 | 0.93 | 0.95 | 0.95 | 0.96 | 0.97 | 0.97 | 0.98 | 0.98 | 0.99 | 0.99 | 0.99 | 0.99 | 0.99 | 0.99 | 1.00 | 1.00 | 1.00 |      |
|              | 4 | 0.09 | 0.17 | 0.25 | 0.31 | 0.38 | 0.44 | 0.50 | 0.55 | 0.59 | 0.63 | 0.66 | 0.70 | 0.73 | 0.77 | 0.80 | 0.83 | 0.86 | 0.89 | 0.91 | 0.93 | 0.94 | 0.95 | 0.96 | 0.97 | 0.98 | 0.98 | 0.99 | 0.99 | 0.99 | 0.99 | 1.00 | 1.00 | 1.00 | 1.00 | 1.00 |      |
|              | 5 | 0.10 | 0.20 | 0.27 | 0.34 | 0.40 | 0.45 | 0.50 | 0.55 | 0.60 | 0.64 | 0.67 | 0.72 | 0.76 | 0.80 | 0.85 | 0.87 | 0.90 | 0.93 | 0.95 | 0.96 | 0.97 | 0.98 | 0.99 | 0.99 | 0.99 | 0.99 | 0.99 | 1.00 | 1.00 | 1.00 | 1.00 | 1.00 | 1.00 | 1.00 | 1.00 |      |
|              | 6 | 0.10 | 0.20 | 0.27 | 0.33 | 0.39 | 0.45 | 0.51 | 0.57 | 0.62 | 0.66 | 0.71 | 0.75 | 0.80 | 0.83 | 0.86 | 0.89 | 0.91 | 0.93 | 0.95 | 0.96 | 0.97 | 0.98 | 0.99 | 0.99 | 0.99 | 0.99 | 0.99 | 1.00 | 1.00 | 1.00 | 1.00 | 1.00 | 1.00 | 1.00 | 1.00 |      |
| CCSM4        | 1 | 0.14 | 0.25 | 0.33 | 0.37 | 0.41 | 0.44 | 0.53 | 0.58 | 0.62 | 0.66 | 0.70 | 0.72 | 0.75 | 0.77 | 0.79 | 0.81 | 0.83 | 0.84 | 0.86 | 0.88 | 0.89 | 0.90 | 0.91 | 0.92 | 0.94 | 0.95 | 0.96 | 0.97 | 0.98 | 0.98 | 0.98 | 0.98 | 0.99 | 1.00 | 1.00 |      |
|              | 2 | 0.13 | 0.25 | 0.33 | 0.38 | 0.43 | 0.51 | 0.57 | 0.62 | 0.67 | 0.70 | 0.73 | 0.75 | 0.77 | 0.78 | 0.80 | 0.81 | 0.81 | 0.83 | 0.84 | 0.86 | 0.88 | 0.89 | 0.90 | 0.91 | 0.92 | 0.93 | 0.94 | 0.95 | 0.97 | 0.97 | 0.98 | 0.98 | 0.99 | 1.00 | 1.00 |      |
|              | 3 | 0.09 | 0.18 | 0.25 | 0.30 | 0.34 | 0.37 | 0.42 | 0.46 | 0.50 | 0.53 | 0.56 | 0.59 | 0.62 | 0.64 | 0.67 | 0.69 | 0.71 | 0.71 | 0.73 | 0.75 | 0.77 | 0.79 | 0.81 | 0.82 | 0.84 | 0.85 | 0.88 | 0.89 | 0.92 | 0.93 | 0.95 | 0.97 | 0.98 | 0.99 | 1.00 |      |
|              | 4 | 0.09 | 0.18 | 0.25 | 0.29 | 0.34 | 0.39 | 0.43 | 0.47 | 0.54 | 0.56 | 0.60 | 0.62 | 0.64 | 0.67 | 0.69 | 0.71 | 0.73 | 0.75 | 0.77 | 0.78 | 0.79 | 0.80 | 0.82 | 0.84 | 0.85 | 0.87 | 0.88 | 0.90 | 0.91 | 0.92 | 0.93 | 0.94 | 0.96 | 0.98 | 0.99 |      |

|            |   |      |      |      |      |      |      |      |      |      |      |      |      |      |      |      |      |      |      |      |      |      |      |      |      |      |      |      |      |      |      |      |      |      |      |      |      |
|------------|---|------|------|------|------|------|------|------|------|------|------|------|------|------|------|------|------|------|------|------|------|------|------|------|------|------|------|------|------|------|------|------|------|------|------|------|------|
|            |   | 5    | 0.10 | 0.20 | 0.28 | 0.34 | 0.38 | 0.45 | 0.49 | 0.53 | 0.56 | 0.58 | 0.60 | 0.61 | 0.63 | 0.65 | 0.67 | 0.67 | 0.68 | 0.70 | 0.71 | 0.72 | 0.73 | 0.74 | 0.75 | 0.79 | 0.81 | 0.83 | 0.84 | 0.85 | 0.86 | 0.88 | 0.90 | 0.93 | 0.95 | 0.98 | 0.99 |
|            |   | 6    | 0.10 | 0.20 | 0.29 | 0.35 | 0.40 | 0.45 | 0.50 | 0.54 | 0.56 | 0.57 | 0.59 | 0.61 | 0.61 | 0.62 | 0.64 | 0.65 | 0.67 | 0.68 | 0.70 | 0.71 | 0.73 | 0.74 | 0.75 | 0.77 | 0.78 | 0.79 | 0.81 | 0.84 | 0.86 | 0.89 | 0.91 | 0.93 | 0.97 | 0.99 | 1.00 |
| CMCC-CM    | 1 | 0.14 | 0.22 | 0.28 | 0.34 | 0.40 | 0.46 | 0.52 | 0.59 | 0.65 | 0.75 | 0.79 | 0.82 | 0.85 | 0.87 | 0.88 | 0.89 | 0.90 | 0.91 | 0.92 | 0.93 | 0.94 | 0.94 | 0.98 | 0.98 | 0.99 | 0.99 | 0.99 | 0.99 | 0.99 | 1.00 | 1.00 | 1.00 | 1.00 | 1.00 | 1.00 | 1.00 |
|            | 2 | 0.13 | 0.23 | 0.32 | 0.40 | 0.49 | 0.56 | 0.63 | 0.68 | 0.73 | 0.77 | 0.80 | 0.83 | 0.86 | 0.88 | 0.90 | 0.92 | 0.94 | 0.95 | 0.95 | 0.96 | 0.98 | 0.98 | 0.99 | 0.99 | 0.99 | 0.99 | 0.99 | 0.99 | 1.00 | 1.00 | 1.00 | 1.00 | 1.00 | 1.00 | 1.00 | 1.00 |
|            | 3 | 0.09 | 0.18 | 0.24 | 0.30 | 0.35 | 0.40 | 0.45 | 0.49 | 0.52 | 0.58 | 0.63 | 0.67 | 0.78 | 0.81 | 0.85 | 0.88 | 0.91 | 0.95 | 0.98 | 0.98 | 0.99 | 0.99 | 0.99 | 0.99 | 1.00 | 1.00 | 1.00 | 1.00 | 1.00 | 1.00 | 1.00 | 1.00 | 1.00 | 1.00 | 1.00 | 1.00 |
|            | 4 | 0.09 | 0.18 | 0.26 | 0.32 | 0.37 | 0.43 | 0.49 | 0.55 | 0.61 | 0.66 | 0.71 | 0.81 | 0.85 | 0.87 | 0.91 | 0.94 | 0.95 | 0.96 | 0.97 | 0.98 | 0.98 | 0.99 | 0.99 | 0.99 | 1.00 | 1.00 | 1.00 | 1.00 | 1.00 | 1.00 | 1.00 | 1.00 | 1.00 | 1.00 | 1.00 | 1.00 |
|            | 5 | 0.10 | 0.20 | 0.27 | 0.32 | 0.38 | 0.45 | 0.56 | 0.63 | 0.68 | 0.72 | 0.75 | 0.79 | 0.82 | 0.85 | 0.88 | 0.90 | 0.93 | 0.94 | 0.96 | 0.97 | 0.98 | 0.99 | 0.99 | 1.00 | 1.00 | 1.00 | 1.00 | 1.00 | 1.00 | 1.00 | 1.00 | 1.00 | 1.00 | 1.00 | 1.00 | 1.00 |
|            | 6 | 0.10 | 0.20 | 0.28 | 0.35 | 0.41 | 0.47 | 0.54 | 0.60 | 0.66 | 0.70 | 0.74 | 0.78 | 0.82 | 0.86 | 0.88 | 0.91 | 0.93 | 0.95 | 0.97 | 0.98 | 0.99 | 0.99 | 1.00 | 1.00 | 1.00 | 1.00 | 1.00 | 1.00 | 1.00 | 1.00 | 1.00 | 1.00 | 1.00 | 1.00 | 1.00 | 1.00 |
| CMCC-CM5   | 1 | 0.13 | 0.23 | 0.33 | 0.41 | 0.49 | 0.57 | 0.64 | 0.71 | 0.80 | 0.84 | 0.88 | 0.90 | 0.93 | 0.95 | 0.97 | 0.97 | 0.98 | 0.99 | 0.99 | 0.99 | 0.99 | 1.00 | 1.00 | 1.00 | 1.00 | 1.00 | 1.00 | 1.00 | 1.00 | 1.00 | 1.00 | 1.00 | 1.00 | 1.00 | 1.00 | 1.00 |
|            | 2 | 0.12 | 0.23 | 0.32 | 0.39 | 0.45 | 0.51 | 0.59 | 0.65 | 0.69 | 0.73 | 0.78 | 0.83 | 0.86 | 0.89 | 0.91 | 0.93 | 0.94 | 0.95 | 0.97 | 0.98 | 0.98 | 0.98 | 0.99 | 0.99 | 0.99 | 0.99 | 0.99 | 0.99 | 0.99 | 1.00 | 1.00 | 1.00 | 1.00 | 1.00 | 1.00 | 1.00 |
|            | 3 | 0.09 | 0.18 | 0.26 | 0.32 | 0.38 | 0.43 | 0.50 | 0.55 | 0.61 | 0.65 | 0.69 | 0.72 | 0.76 | 0.78 | 0.81 | 0.83 | 0.85 | 0.88 | 0.90 | 0.92 | 0.94 | 0.95 | 0.97 | 0.98 | 0.98 | 0.99 | 0.99 | 1.00 | 1.00 | 1.00 | 1.00 | 1.00 | 1.00 | 1.00 | 1.00 | 1.00 |
|            | 4 | 0.09 | 0.18 | 0.25 | 0.31 | 0.35 | 0.40 | 0.45 | 0.54 | 0.59 | 0.64 | 0.68 | 0.73 | 0.76 | 0.80 | 0.83 | 0.85 | 0.88 | 0.90 | 0.92 | 0.93 | 0.94 | 0.96 | 0.96 | 0.97 | 0.97 | 0.97 | 0.98 | 0.98 | 0.98 | 0.98 | 0.99 | 0.99 | 1.00 | 1.00 | 1.00 | 1.00 |
|            | 5 | 0.10 | 0.20 | 0.27 | 0.33 | 0.40 | 0.46 | 0.51 | 0.55 | 0.61 | 0.64 | 0.73 | 0.76 | 0.80 | 0.82 | 0.84 | 0.86 | 0.88 | 0.90 | 0.92 | 0.93 | 0.95 | 0.96 | 0.97 | 0.97 | 0.98 | 0.99 | 1.00 | 1.00 | 1.00 | 1.00 | 1.00 | 1.00 | 1.00 | 1.00 | 1.00 | 1.00 |
|            | 6 | 0.10 | 0.20 | 0.28 | 0.34 | 0.38 | 0.44 | 0.48 | 0.53 | 0.57 | 0.61 | 0.66 | 0.70 | 0.74 | 0.77 | 0.84 | 0.86 | 0.90 | 0.91 | 0.94 | 0.95 | 0.96 | 0.97 | 0.98 | 0.99 | 0.99 | 0.99 | 1.00 | 1.00 | 1.00 | 1.00 | 1.00 | 1.00 | 1.00 | 1.00 | 1.00 | 1.00 |
| CNRM-CM5   | 1 | 0.14 | 0.26 | 0.38 | 0.45 | 0.50 | 0.53 | 0.58 | 0.62 | 0.67 | 0.71 | 0.74 | 0.77 | 0.80 | 0.82 | 0.84 | 0.86 | 0.89 | 0.92 | 0.93 | 0.94 | 0.95 | 0.96 | 0.97 | 0.97 | 0.98 | 0.99 | 0.99 | 0.99 | 0.99 | 0.99 | 1.00 | 1.00 | 1.00 | 1.00 | 1.00 | 1.00 |
|            | 2 | 0.13 | 0.23 | 0.33 | 0.40 | 0.47 | 0.51 | 0.55 | 0.60 | 0.65 | 0.70 | 0.74 | 0.77 | 0.80 | 0.82 | 0.86 | 0.88 | 0.91 | 0.93 | 0.94 | 0.95 | 0.96 | 0.97 | 0.98 | 0.98 | 0.99 | 0.99 | 0.99 | 1.00 | 1.00 | 1.00 | 1.00 | 1.00 | 1.00 | 1.00 | 1.00 | 1.00 |
|            | 3 | 0.09 | 0.18 | 0.26 | 0.33 | 0.38 | 0.43 | 0.48 | 0.53 | 0.59 | 0.65 | 0.70 | 0.75 | 0.79 | 0.82 | 0.84 | 0.87 | 0.89 | 0.91 | 0.93 | 0.94 | 0.96 | 0.97 | 0.97 | 0.98 | 0.98 | 0.98 | 0.99 | 0.99 | 0.99 | 0.99 | 0.99 | 1.00 | 1.00 | 1.00 | 1.00 | 1.00 |
|            | 4 | 0.09 | 0.18 | 0.25 | 0.32 | 0.38 | 0.43 | 0.48 | 0.53 | 0.58 | 0.64 | 0.69 | 0.73 | 0.76 | 0.79 | 0.82 | 0.84 | 0.86 | 0.88 | 0.90 | 0.92 | 0.94 | 0.96 | 0.97 | 0.98 | 0.99 | 0.99 | 0.99 | 0.99 | 1.00 | 1.00 | 1.00 | 1.00 | 1.00 | 1.00 | 1.00 | 1.00 |
|            | 5 | 0.10 | 0.20 | 0.28 | 0.33 | 0.38 | 0.45 | 0.51 | 0.56 | 0.60 | 0.65 | 0.68 | 0.72 | 0.74 | 0.77 | 0.80 | 0.84 | 0.88 | 0.90 | 0.93 | 0.94 | 0.96 | 0.97 | 0.98 | 0.99 | 0.99 | 0.99 | 0.99 | 1.00 | 1.00 | 1.00 | 1.00 | 1.00 | 1.00 | 1.00 | 1.00 | 1.00 |
|            | 6 | 0.10 | 0.19 | 0.25 | 0.31 | 0.39 | 0.45 | 0.50 | 0.54 | 0.58 | 0.62 | 0.66 | 0.69 | 0.72 | 0.74 | 0.77 | 0.81 | 0.84 | 0.88 | 0.90 | 0.93 | 0.94 | 0.96 | 0.97 | 0.98 | 0.98 | 0.98 | 0.99 | 0.99 | 0.99 | 0.99 | 1.00 | 1.00 | 1.00 | 1.00 | 1.00 | 1.00 |
| GFDL-CM3   | 1 | 0.10 | 0.20 | 0.27 | 0.35 | 0.42 | 0.47 | 0.53 | 0.57 | 0.61 | 0.65 | 0.68 | 0.71 | 0.72 | 0.75 | 0.80 | 0.83 | 0.84 | 0.86 | 0.88 | 0.89 | 0.90 | 0.92 | 0.94 | 0.95 | 0.96 | 0.97 | 0.98 | 0.99 | 0.99 | 1.00 | 1.00 | 1.00 | 1.00 | 1.00 | 1.00 | 1.00 |
|            | 2 | 0.11 | 0.20 | 0.27 | 0.33 | 0.40 | 0.46 | 0.52 | 0.58 | 0.62 | 0.67 | 0.70 | 0.72 | 0.76 | 0.80 | 0.83 | 0.85 | 0.87 | 0.89 | 0.90 | 0.92 | 0.93 | 0.94 | 0.95 | 0.96 | 0.97 | 0.98 | 0.98 | 0.99 | 0.99 | 0.99 | 0.99 | 0.99 | 1.00 | 1.00 | 1.00 | 1.00 |
|            | 3 | 0.09 | 0.16 | 0.22 | 0.28 | 0.32 | 0.37 | 0.42 | 0.48 | 0.53 | 0.59 | 0.64 | 0.68 | 0.71 | 0.74 | 0.78 | 0.79 | 0.81 | 0.83 | 0.86 | 0.87 | 0.89 | 0.91 | 0.92 | 0.93 | 0.94 | 0.95 | 0.96 | 0.96 | 0.97 | 0.97 | 0.97 | 0.98 | 0.99 | 1.00 | 1.00 | 1.00 |
|            | 4 | 0.09 | 0.17 | 0.23 | 0.29 | 0.35 | 0.40 | 0.44 | 0.50 | 0.56 | 0.62 | 0.67 | 0.71 | 0.74 | 0.77 | 0.79 | 0.82 | 0.84 | 0.86 | 0.87 | 0.89 | 0.90 | 0.91 | 0.92 | 0.93 | 0.94 | 0.95 | 0.95 | 0.95 | 0.96 | 0.96 | 0.97 | 0.97 | 0.98 | 0.98 | 0.99 |      |
|            | 5 | 0.10 | 0.18 | 0.25 | 0.31 | 0.36 | 0.40 | 0.46 | 0.52 | 0.57 | 0.61 | 0.65 | 0.69 | 0.72 | 0.74 | 0.76 | 0.78 | 0.80 | 0.82 | 0.84 | 0.85 | 0.87 | 0.89 | 0.90 | 0.92 | 0.94 | 0.95 | 0.96 | 0.97 | 0.98 | 0.99 | 0.99 | 0.99 | 0.99 | 1.00 | 1.00 | 1.00 |
|            | 6 | 0.10 | 0.19 | 0.25 | 0.30 | 0.35 | 0.41 | 0.46 | 0.52 | 0.58 | 0.63 | 0.68 | 0.71 | 0.74 | 0.77 | 0.79 | 0.81 | 0.83 | 0.85 | 0.87 | 0.88 | 0.90 | 0.92 | 0.93 | 0.94 | 0.95 | 0.96 | 0.97 | 0.97 | 0.98 | 0.98 | 0.98 | 0.99 | 0.99 | 0.99 | 1.00 | 1.00 |
| GFDL-ESM2G | 1 | 0.14 | 0.28 | 0.33 | 0.36 | 0.42 | 0.48 | 0.55 | 0.61 | 0.66 | 0.71 | 0.75 | 0.80 | 0.83 | 0.85 | 0.88 | 0.90 | 0.93 | 0.95 | 0.96 | 0.97 | 0.98 | 0.99 | 0.99 | 0.99 | 1.00 | 1.00 | 1.00 | 1.00 | 1.00 | 1.00 | 1.00 | 1.00 | 1.00 | 1.00 | 1.00 | 1.00 |
|            | 2 | 0.13 | 0.25 | 0.34 | 0.40 | 0.45 | 0.49 | 0.57 | 0.61 | 0.65 | 0.70 | 0.72 | 0.76 | 0.79 | 0.82 | 0.86 | 0.88 | 0.90 | 0.93 | 0.94 | 0.95 | 0.97 | 0.97 | 0.99 | 0.99 | 0.99 | 0.99 | 1.00 | 1.00 | 1.00 | 1.00 | 1.00 | 1.00 | 1.00 | 1.00 | 1.00 | 1.00 |
|            | 3 | 0.09 | 0.18 | 0.26 | 0.32 | 0.37 | 0.43 | 0.48 | 0.53 | 0.57 | 0.61 | 0.66 | 0.70 | 0.74 | 0.78 | 0.81 | 0.83 | 0.85 | 0.88 | 0.90 | 0.91 | 0.92 | 0.93 | 0.94 | 0.95 | 0.95 | 0.96 | 0.97 | 0.99 | 0.99 | 0.99 | 1.00 | 1.00 | 1.00 | 1.00 | 1.00 | 1.00 |
|            | 4 | 0.09 | 0.18 | 0.24 | 0.30 | 0.35 | 0.40 | 0.45 | 0.49 | 0.55 | 0.59 | 0.63 | 0.66 | 0.68 | 0.71 | 0.74 | 0.77 | 0.79 | 0.81 | 0.83 | 0.85 | 0.86 | 0.88 | 0.90 | 0.92 | 0.92 | 0.93 | 0.95 | 0.95 | 0.96 | 0.97 | 0.98 | 0.98 | 1.00 | 1.00 | 1.00 | 1.00 |
|            | 5 | 0.10 | 0.20 | 0.27 | 0.32 | 0.37 | 0.42 | 0.47 | 0.52 | 0.56 | 0.59 | 0.63 | 0.67 | 0.70 | 0.73 | 0.76 | 0.79 | 0.82 | 0.84 | 0.86 | 0.89 | 0.91 | 0.92 | 0.94 | 0.95 | 0.96 | 0.97 | 0.98 | 0.98 | 0.98 | 0.99 | 0.99 | 0.99 | 1.00 | 1.00 | 1.00 | 1.00 |

|              | 6 | 0.10 | 0.20 | 0.27 | 0.33 | 0.40 | 0.46 | 0.51 | 0.54 | 0.59 | 0.63 | 0.67 | 0.72 | 0.75 | 0.79 | 0.81 | 0.83 | 0.85 | 0.87 | 0.89 | 0.90 | 0.91 | 0.92 | 0.93 | 0.93 | 0.93 | 0.94 | 0.94 | 0.94 | 0.95 | 0.95 | 0.96 | 0.97 | 0.97 | 0.98 | 0.99 |      |
|--------------|---|------|------|------|------|------|------|------|------|------|------|------|------|------|------|------|------|------|------|------|------|------|------|------|------|------|------|------|------|------|------|------|------|------|------|------|------|
| GFDL-ESM2M   | 1 | 0.14 | 0.28 | 0.39 | 0.45 | 0.51 | 0.54 | 0.57 | 0.61 | 0.64 | 0.66 | 0.69 | 0.71 | 0.73 | 0.75 | 0.76 | 0.78 | 0.80 | 0.82 | 0.84 | 0.86 | 0.92 | 0.95 | 0.96 | 0.97 | 0.98 | 0.98 | 0.99 | 1.00 | 1.00 | 1.00 | 1.00 | 1.00 | 1.00 | 1.00 | 1.00 |      |
|              | 2 | 0.13 | 0.25 | 0.36 | 0.44 | 0.50 | 0.55 | 0.61 | 0.65 | 0.70 | 0.72 | 0.74 | 0.76 | 0.77 | 0.79 | 0.81 | 0.82 | 0.89 | 0.90 | 0.91 | 0.93 | 0.94 | 0.95 | 0.96 | 0.97 | 0.98 | 0.99 | 0.99 | 0.99 | 0.99 | 0.99 | 1.00 | 1.00 | 1.00 | 1.00 | 1.00 |      |
|              | 3 | 0.09 | 0.18 | 0.27 | 0.35 | 0.41 | 0.46 | 0.49 | 0.52 | 0.56 | 0.59 | 0.61 | 0.64 | 0.66 | 0.72 | 0.75 | 0.76 | 0.78 | 0.80 | 0.81 | 0.82 | 0.83 | 0.85 | 0.87 | 0.88 | 0.89 | 0.91 | 0.93 | 0.95 | 0.97 | 0.98 | 0.98 | 0.99 | 1.00 | 1.00 | 1.00 |      |
|              | 4 | 0.09 | 0.18 | 0.27 | 0.35 | 0.40 | 0.45 | 0.49 | 0.54 | 0.59 | 0.65 | 0.67 | 0.69 | 0.71 | 0.73 | 0.75 | 0.77 | 0.78 | 0.81 | 0.82 | 0.85 | 0.87 | 0.89 | 0.91 | 0.92 | 0.94 | 0.95 | 0.97 | 0.97 | 0.98 | 0.99 | 0.99 | 0.99 | 1.00 | 1.00 | 1.00 |      |
|              | 5 | 0.10 | 0.20 | 0.30 | 0.39 | 0.46 | 0.52 | 0.56 | 0.59 | 0.64 | 0.66 | 0.68 | 0.69 | 0.70 | 0.72 | 0.73 | 0.74 | 0.76 | 0.77 | 0.79 | 0.81 | 0.82 | 0.83 | 0.85 | 0.87 | 0.89 | 0.91 | 0.93 | 0.94 | 0.96 | 0.96 | 0.97 | 0.97 | 0.98 | 0.99 | 0.99 |      |
|              | 6 | 0.10 | 0.20 | 0.29 | 0.37 | 0.45 | 0.51 | 0.56 | 0.60 | 0.65 | 0.67 | 0.70 | 0.72 | 0.73 | 0.75 | 0.76 | 0.79 | 0.80 | 0.81 | 0.83 | 0.83 | 0.85 | 0.85 | 0.86 | 0.87 | 0.88 | 0.88 | 0.90 | 0.93 | 0.95 | 0.97 | 0.98 | 0.98 | 0.99 | 0.99 | 1.00 |      |
| HadGEM2-AO   | 1 | 0.12 | 0.17 | 0.21 | 0.30 | 0.34 | 0.38 | 0.42 | 0.45 | 0.50 | 0.53 | 0.56 | 0.59 | 0.62 | 0.65 | 0.68 | 0.71 | 0.73 | 0.75 | 0.77 | 0.78 | 0.80 | 0.82 | 0.83 | 0.85 | 0.87 | 0.89 | 0.89 | 0.89 | 0.91 | 0.92 | 0.93 | 0.94 | 0.97 | 0.98 | 0.99 |      |
|              | 2 | 0.12 | 0.20 | 0.27 | 0.33 | 0.38 | 0.41 | 0.44 | 0.47 | 0.50 | 0.52 | 0.55 | 0.57 | 0.58 | 0.58 | 0.60 | 0.62 | 0.64 | 0.66 | 0.68 | 0.70 | 0.72 | 0.75 | 0.77 | 0.79 | 0.82 | 0.85 | 0.86 | 0.87 | 0.88 | 0.91 | 0.92 | 0.94 | 0.95 | 0.97 | 0.99 |      |
|              | 3 | 0.09 | 0.15 | 0.22 | 0.28 | 0.34 | 0.39 | 0.44 | 0.48 | 0.51 | 0.54 | 0.57 | 0.59 | 0.61 | 0.64 | 0.66 | 0.68 | 0.70 | 0.72 | 0.73 | 0.74 | 0.76 | 0.78 | 0.80 | 0.83 | 0.84 | 0.86 | 0.87 | 0.89 | 0.90 | 0.91 | 0.92 | 0.94 | 0.95 | 0.96 | 0.98 |      |
|              | 4 | 0.09 | 0.16 | 0.22 | 0.27 | 0.32 | 0.37 | 0.41 | 0.45 | 0.48 | 0.52 | 0.54 | 0.57 | 0.60 | 0.60 | 0.62 | 0.65 | 0.67 | 0.70 | 0.72 | 0.74 | 0.75 | 0.77 | 0.79 | 0.81 | 0.83 | 0.84 | 0.86 | 0.88 | 0.89 | 0.89 | 0.90 | 0.92 | 0.94 | 0.95 | 0.98 |      |
|              | 5 | 0.08 | 0.16 | 0.22 | 0.28 | 0.33 | 0.38 | 0.42 | 0.48 | 0.52 | 0.57 | 0.60 | 0.63 | 0.66 | 0.69 | 0.72 | 0.74 | 0.76 | 0.77 | 0.78 | 0.80 | 0.83 | 0.85 | 0.86 | 0.87 | 0.89 | 0.91 | 0.92 | 0.93 | 0.94 | 0.95 | 0.96 | 0.97 | 0.98 | 0.99 | 1.00 |      |
|              | 6 | 0.10 | 0.19 | 0.26 | 0.33 | 0.40 | 0.46 | 0.52 | 0.56 | 0.60 | 0.63 | 0.67 | 0.70 | 0.73 | 0.76 | 0.78 | 0.81 | 0.83 | 0.85 | 0.87 | 0.88 | 0.89 | 0.91 | 0.92 | 0.92 | 0.92 | 0.92 | 0.93 | 0.94 | 0.96 | 0.96 | 0.97 | 0.97 | 0.98 | 0.99 | 0.99 | 1.00 |
| HadGEM2-CC   | 1 | 0.13 | 0.23 | 0.33 | 0.41 | 0.49 | 0.58 | 0.67 | 0.73 | 0.78 | 0.82 | 0.85 | 0.87 | 0.90 | 0.91 | 0.96 | 0.96 | 0.98 | 0.98 | 0.99 | 0.99 | 1.00 | 1.00 | 1.00 | 1.00 | 1.00 | 1.00 | 1.00 | 1.00 | 1.00 | 1.00 | 1.00 | 1.00 | 1.00 | 1.00 | 1.00 | 1.00 |
|              | 2 | 0.12 | 0.24 | 0.33 | 0.42 | 0.48 | 0.54 | 0.59 | 0.65 | 0.71 | 0.75 | 0.79 | 0.82 | 0.85 | 0.92 | 0.93 | 0.95 | 0.96 | 0.97 | 0.98 | 0.99 | 0.99 | 1.00 | 1.00 | 1.00 | 1.00 | 1.00 | 1.00 | 1.00 | 1.00 | 1.00 | 1.00 | 1.00 | 1.00 | 1.00 | 1.00 | 1.00 |
|              | 3 | 0.09 | 0.18 | 0.27 | 0.34 | 0.40 | 0.46 | 0.51 | 0.56 | 0.61 | 0.66 | 0.70 | 0.77 | 0.81 | 0.85 | 0.89 | 0.92 | 0.94 | 0.95 | 0.97 | 0.98 | 0.99 | 0.99 | 1.00 | 1.00 | 1.00 | 1.00 | 1.00 | 1.00 | 1.00 | 1.00 | 1.00 | 1.00 | 1.00 | 1.00 | 1.00 | 1.00 |
|              | 4 | 0.09 | 0.18 | 0.26 | 0.33 | 0.40 | 0.46 | 0.51 | 0.57 | 0.62 | 0.66 | 0.72 | 0.76 | 0.82 | 0.86 | 0.88 | 0.91 | 0.94 | 0.96 | 0.97 | 0.98 | 0.99 | 0.99 | 1.00 | 1.00 | 1.00 | 1.00 | 1.00 | 1.00 | 1.00 | 1.00 | 1.00 | 1.00 | 1.00 | 1.00 | 1.00 | 1.00 |
|              | 5 | 0.10 | 0.20 | 0.28 | 0.35 | 0.43 | 0.49 | 0.54 | 0.59 | 0.64 | 0.67 | 0.71 | 0.75 | 0.81 | 0.85 | 0.89 | 0.92 | 0.95 | 0.97 | 0.98 | 0.98 | 0.99 | 0.99 | 0.99 | 0.99 | 1.00 | 1.00 | 1.00 | 1.00 | 1.00 | 1.00 | 1.00 | 1.00 | 1.00 | 1.00 | 1.00 | 1.00 |
|              | 6 | 0.10 | 0.20 | 0.29 | 0.37 | 0.44 | 0.50 | 0.55 | 0.60 | 0.64 | 0.69 | 0.72 | 0.77 | 0.84 | 0.87 | 0.89 | 0.92 | 0.94 | 0.95 | 0.97 | 0.97 | 0.98 | 0.98 | 0.99 | 1.00 | 1.00 | 1.00 | 1.00 | 1.00 | 1.00 | 1.00 | 1.00 | 1.00 | 1.00 | 1.00 | 1.00 | 1.00 |
| IPSL-CM5A-MR | 1 | 0.14 | 0.22 | 0.28 | 0.34 | 0.40 | 0.45 | 0.53 | 0.57 | 0.61 | 0.67 | 0.72 | 0.76 | 0.80 | 0.84 | 0.86 | 0.88 | 0.90 | 0.92 | 0.93 | 0.95 | 0.96 | 0.97 | 0.97 | 0.98 | 0.98 | 0.99 | 0.99 | 0.99 | 0.99 | 0.99 | 0.99 | 1.00 | 1.00 | 1.00 | 1.00 |      |
|              | 2 | 0.13 | 0.21 | 0.29 | 0.35 | 0.41 | 0.49 | 0.53 | 0.57 | 0.63 | 0.68 | 0.72 | 0.75 | 0.78 | 0.81 | 0.85 | 0.87 | 0.89 | 0.91 | 0.92 | 0.94 | 0.96 | 0.97 | 0.97 | 0.98 | 0.98 | 0.99 | 0.99 | 0.99 | 0.99 | 0.99 | 0.99 | 1.00 | 1.00 | 1.00 | 1.00 |      |
|              | 3 | 0.09 | 0.17 | 0.23 | 0.29 | 0.35 | 0.39 | 0.45 | 0.53 | 0.58 | 0.63 | 0.67 | 0.71 | 0.74 | 0.77 | 0.81 | 0.83 | 0.86 | 0.88 | 0.90 | 0.92 | 0.94 | 0.95 | 0.96 | 0.97 | 0.97 | 0.97 | 0.98 | 0.98 | 0.99 | 0.99 | 0.99 | 0.99 | 1.00 | 1.00 | 1.00 | 1.00 |
|              | 4 | 0.09 | 0.18 | 0.23 | 0.28 | 0.33 | 0.38 | 0.43 | 0.48 | 0.52 | 0.62 | 0.65 | 0.69 | 0.73 | 0.76 | 0.80 | 0.83 | 0.86 | 0.88 | 0.90 | 0.92 | 0.94 | 0.95 | 0.96 | 0.97 | 0.97 | 0.98 | 0.99 | 0.99 | 0.99 | 0.99 | 0.99 | 1.00 | 1.00 | 1.00 | 1.00 |      |
|              | 5 | 0.10 | 0.20 | 0.27 | 0.32 | 0.37 | 0.42 | 0.48 | 0.54 | 0.62 | 0.67 | 0.70 | 0.74 | 0.77 | 0.80 | 0.83 | 0.85 | 0.87 | 0.88 | 0.89 | 0.91 | 0.91 | 0.93 | 0.94 | 0.95 | 0.95 | 0.96 | 0.96 | 0.97 | 0.98 | 0.98 | 0.98 | 0.99 | 0.99 | 1.00 | 1.00 |      |
|              | 6 | 0.10 | 0.20 | 0.27 | 0.32 | 0.37 | 0.43 | 0.48 | 0.54 | 0.58 | 0.62 | 0.67 | 0.70 | 0.76 | 0.79 | 0.82 | 0.85 | 0.86 | 0.87 | 0.89 | 0.90 | 0.92 | 0.94 | 0.96 | 0.96 | 0.97 | 0.98 | 0.98 | 0.98 | 0.98 | 0.99 | 0.99 | 0.99 | 0.99 | 1.00 | 1.00 |      |
| MIROC5       | 1 | 0.10 | 0.17 | 0.23 | 0.29 | 0.34 | 0.37 | 0.40 | 0.45 | 0.50 | 0.59 | 0.63 | 0.68 | 0.71 | 0.75 | 0.78 | 0.81 | 0.84 | 0.87 | 0.90 | 0.92 | 0.94 | 0.95 | 0.96 | 0.97 | 0.98 | 0.98 | 0.98 | 0.99 | 0.99 | 0.99 | 1.00 | 1.00 | 1.00 | 1.00 | 1.00 |      |
|              | 2 | 0.11 | 0.20 | 0.28 | 0.35 | 0.42 | 0.48 | 0.56 | 0.61 | 0.65 | 0.68 | 0.70 | 0.73 | 0.77 | 0.79 | 0.82 | 0.85 | 0.88 | 0.90 | 0.92 | 0.93 | 0.95 | 0.97 | 0.97 | 0.98 | 0.99 | 0.99 | 0.99 | 0.99 | 0.99 | 1.00 | 1.00 | 1.00 | 1.00 | 1.00 | 1.00 |      |
|              | 3 | 0.08 | 0.16 | 0.23 | 0.30 | 0.36 | 0.41 | 0.48 | 0.53 | 0.58 | 0.62 | 0.65 | 0.68 | 0.70 | 0.73 | 0.75 | 0.77 | 0.79 | 0.82 | 0.84 | 0.86 | 0.88 | 0.90 | 0.91 | 0.93 | 0.94 | 0.95 | 0.95 | 0.96 | 0.97 | 0.98 | 0.98 | 0.98 | 0.99 | 1.00 | 1.00 |      |
|              | 4 | 0.09 | 0.17 | 0.25 | 0.33 | 0.40 | 0.45 | 0.50 | 0.54 | 0.57 | 0.62 | 0.65 | 0.67 | 0.69 | 0.72 | 0.75 | 0.77 | 0.79 | 0.82 | 0.83 | 0.86 | 0.88 | 0.89 | 0.91 | 0.93 | 0.95 | 0.96 | 0.97 | 0.98 | 0.98 | 0.99 | 1.00 | 1.00 | 1.00 | 1.00 | 1.00 |      |



|            |   |      |      |      |      |      |      |      |      |      |      |      |      |      |      |      |      |      |      |      |      |      |      |      |      |      |      |      |      |      |      |      |      |      |      |      |
|------------|---|------|------|------|------|------|------|------|------|------|------|------|------|------|------|------|------|------|------|------|------|------|------|------|------|------|------|------|------|------|------|------|------|------|------|------|
|            | 5 | 0.10 | 0.19 | 0.27 | 0.35 | 0.41 | 0.46 | 0.51 | 0.55 | 0.59 | 0.63 | 0.66 | 0.69 | 0.71 | 0.74 | 0.77 | 0.79 | 0.80 | 0.82 | 0.84 | 0.86 | 0.88 | 0.90 | 0.91 | 0.93 | 0.94 | 0.95 | 0.96 | 0.97 | 0.97 | 0.98 | 0.98 | 0.98 | 0.99 | 1.00 | 1.00 |
|            | 6 | 0.10 | 0.19 | 0.27 | 0.35 | 0.42 | 0.48 | 0.52 | 0.54 | 0.57 | 0.60 | 0.63 | 0.66 | 0.69 | 0.71 | 0.74 | 0.78 | 0.80 | 0.83 | 0.85 | 0.88 | 0.90 | 0.92 | 0.94 | 0.95 | 0.97 | 0.97 | 0.98 | 0.98 | 0.98 | 0.99 | 0.99 | 0.99 | 0.99 | 1.00 | 1.00 |
| MPI-ESM-LR | 1 | 0.14 | 0.28 | 0.38 | 0.45 | 0.51 | 0.56 | 0.65 | 0.69 | 0.74 | 0.80 | 0.83 | 0.86 | 0.89 | 0.91 | 0.92 | 0.94 | 0.95 | 0.96 | 0.97 | 0.98 | 0.99 | 1.00 | 1.00 | 1.00 | 1.00 | 1.00 | 1.00 | 1.00 | 1.00 | 1.00 | 1.00 | 1.00 | 1.00 | 1.00 | 1.00 |
|            | 2 | 0.13 | 0.25 | 0.35 | 0.43 | 0.50 | 0.54 | 0.58 | 0.69 | 0.75 | 0.79 | 0.83 | 0.85 | 0.88 | 0.89 | 0.91 | 0.93 | 0.94 | 0.95 | 0.96 | 0.97 | 0.98 | 0.99 | 1.00 | 1.00 | 1.00 | 1.00 | 1.00 | 1.00 | 1.00 | 1.00 | 1.00 | 1.00 | 1.00 | 1.00 | 1.00 |
|            | 3 | 0.09 | 0.18 | 0.25 | 0.31 | 0.36 | 0.41 | 0.46 | 0.56 | 0.61 | 0.66 | 0.70 | 0.74 | 0.78 | 0.81 | 0.85 | 0.87 | 0.90 | 0.92 | 0.94 | 0.95 | 0.97 | 0.98 | 0.99 | 0.99 | 1.00 | 1.00 | 1.00 | 1.00 | 1.00 | 1.00 | 1.00 | 1.00 | 1.00 | 1.00 | 1.00 |
|            | 4 | 0.09 | 0.17 | 0.24 | 0.30 | 0.35 | 0.44 | 0.51 | 0.56 | 0.61 | 0.67 | 0.71 | 0.74 | 0.77 | 0.79 | 0.82 | 0.83 | 0.86 | 0.88 | 0.90 | 0.92 | 0.93 | 0.95 | 0.96 | 0.97 | 0.98 | 0.98 | 0.99 | 0.99 | 0.99 | 0.99 | 1.00 | 1.00 | 1.00 | 1.00 | 1.00 |
|            | 5 | 0.10 | 0.19 | 0.27 | 0.33 | 0.41 | 0.46 | 0.51 | 0.56 | 0.61 | 0.65 | 0.70 | 0.75 | 0.79 | 0.83 | 0.86 | 0.88 | 0.90 | 0.93 | 0.95 | 0.96 | 0.97 | 0.98 | 0.99 | 0.99 | 0.99 | 1.00 | 1.00 | 1.00 | 1.00 | 1.00 | 1.00 | 1.00 | 1.00 | 1.00 | 1.00 |
|            | 6 | 0.10 | 0.18 | 0.25 | 0.32 | 0.38 | 0.43 | 0.48 | 0.54 | 0.63 | 0.68 | 0.73 | 0.77 | 0.82 | 0.86 | 0.88 | 0.92 | 0.93 | 0.95 | 0.96 | 0.97 | 0.98 | 0.98 | 0.99 | 0.99 | 0.99 | 1.00 | 1.00 | 1.00 | 1.00 | 1.00 | 1.00 | 1.00 | 1.00 | 1.00 | 1.00 |
| MPI-ESM-MR | 1 | 0.14 | 0.26 | 0.34 | 0.42 | 0.45 | 0.50 | 0.56 | 0.63 | 0.68 | 0.74 | 0.77 | 0.80 | 0.84 | 0.88 | 0.89 | 0.91 | 0.93 | 0.94 | 0.95 | 0.96 | 0.96 | 0.97 | 0.97 | 0.98 | 0.98 | 0.98 | 0.99 | 0.99 | 0.99 | 1.00 | 1.00 | 1.00 | 1.00 | 1.00 | 1.00 |
|            | 2 | 0.13 | 0.22 | 0.32 | 0.39 | 0.45 | 0.51 | 0.58 | 0.62 | 0.67 | 0.71 | 0.75 | 0.80 | 0.83 | 0.86 | 0.89 | 0.91 | 0.92 | 0.94 | 0.95 | 0.96 | 0.96 | 0.97 | 0.97 | 0.98 | 0.98 | 0.99 | 0.99 | 0.99 | 1.00 | 1.00 | 1.00 | 1.00 | 1.00 | 1.00 |      |
|            | 3 | 0.09 | 0.17 | 0.25 | 0.32 | 0.39 | 0.44 | 0.49 | 0.53 | 0.57 | 0.61 | 0.65 | 0.69 | 0.72 | 0.76 | 0.79 | 0.83 | 0.86 | 0.89 | 0.90 | 0.91 | 0.93 | 0.94 | 0.95 | 0.97 | 0.97 | 0.98 | 0.98 | 0.99 | 0.99 | 1.00 | 1.00 | 1.00 | 1.00 | 1.00 | 1.00 |
|            | 4 | 0.09 | 0.17 | 0.24 | 0.30 | 0.35 | 0.40 | 0.45 | 0.49 | 0.54 | 0.58 | 0.63 | 0.68 | 0.72 | 0.76 | 0.78 | 0.82 | 0.85 | 0.88 | 0.90 | 0.92 | 0.94 | 0.95 | 0.95 | 0.96 | 0.97 | 0.98 | 0.98 | 0.98 | 0.99 | 0.99 | 0.99 | 0.99 | 1.00 | 1.00 | 1.00 |
|            | 5 | 0.10 | 0.19 | 0.27 | 0.34 | 0.40 | 0.47 | 0.53 | 0.57 | 0.62 | 0.67 | 0.71 | 0.75 | 0.78 | 0.81 | 0.84 | 0.87 | 0.90 | 0.92 | 0.94 | 0.96 | 0.96 | 0.97 | 0.98 | 0.98 | 0.99 | 0.99 | 1.00 | 1.00 | 1.00 | 1.00 | 1.00 | 1.00 | 1.00 | 1.00 | 1.00 |
|            | 6 | 0.10 | 0.18 | 0.23 | 0.29 | 0.33 | 0.37 | 0.43 | 0.49 | 0.56 | 0.61 | 0.66 | 0.70 | 0.74 | 0.78 | 0.80 | 0.83 | 0.85 | 0.87 | 0.89 | 0.91 | 0.93 | 0.95 | 0.96 | 0.98 | 0.98 | 0.98 | 0.99 | 0.99 | 1.00 | 1.00 | 1.00 | 1.00 | 1.00 | 1.00 | 1.00 |
| MPI-ESM-P  | 1 | 0.14 | 0.26 | 0.39 | 0.47 | 0.52 | 0.57 | 0.61 | 0.67 | 0.71 | 0.75 | 0.79 | 0.82 | 0.84 | 0.86 | 0.89 | 0.91 | 0.92 | 0.93 | 0.94 | 0.95 | 0.96 | 0.97 | 0.98 | 0.99 | 0.99 | 0.99 | 0.99 | 1.00 | 1.00 | 1.00 | 1.00 | 1.00 | 1.00 | 1.00 |      |
|            | 2 | 0.13 | 0.21 | 0.29 | 0.36 | 0.43 | 0.48 | 0.59 | 0.64 | 0.70 | 0.73 | 0.76 | 0.79 | 0.82 | 0.85 | 0.88 | 0.90 | 0.92 | 0.94 | 0.96 | 0.97 | 0.98 | 0.99 | 1.00 | 1.00 | 1.00 | 1.00 | 1.00 | 1.00 | 1.00 | 1.00 | 1.00 | 1.00 | 1.00 | 1.00 |      |
|            | 3 | 0.09 | 0.15 | 0.21 | 0.27 | 0.33 | 0.44 | 0.49 | 0.53 | 0.58 | 0.62 | 0.67 | 0.72 | 0.75 | 0.81 | 0.85 | 0.88 | 0.91 | 0.93 | 0.95 | 0.97 | 0.98 | 0.98 | 0.99 | 0.99 | 1.00 | 1.00 | 1.00 | 1.00 | 1.00 | 1.00 | 1.00 | 1.00 | 1.00 | 1.00 |      |
|            | 4 | 0.09 | 0.16 | 0.26 | 0.31 | 0.34 | 0.39 | 0.43 | 0.48 | 0.53 | 0.57 | 0.61 | 0.65 | 0.69 | 0.73 | 0.80 | 0.83 | 0.87 | 0.89 | 0.91 | 0.92 | 0.93 | 0.95 | 0.95 | 0.97 | 0.97 | 0.98 | 0.98 | 0.98 | 0.98 | 0.98 | 0.98 | 0.98 | 0.99 | 0.99 |      |
|            | 5 | 0.10 | 0.19 | 0.25 | 0.29 | 0.36 | 0.40 | 0.45 | 0.52 | 0.58 | 0.63 | 0.68 | 0.72 | 0.75 | 0.79 | 0.82 | 0.86 | 0.89 | 0.91 | 0.93 | 0.94 | 0.95 | 0.96 | 0.96 | 0.97 | 0.98 | 0.99 | 0.99 | 0.99 | 1.00 | 1.00 | 1.00 | 1.00 | 1.00 | 1.00 |      |
|            | 6 | 0.10 | 0.19 | 0.25 | 0.29 | 0.34 | 0.39 | 0.45 | 0.51 | 0.56 | 0.61 | 0.67 | 0.71 | 0.75 | 0.79 | 0.82 | 0.85 | 0.88 | 0.90 | 0.91 | 0.93 | 0.94 | 0.95 | 0.96 | 0.97 | 0.98 | 0.98 | 0.98 | 0.99 | 0.99 | 0.99 | 0.99 | 0.99 | 0.99 | 0.99 | 1.00 |
| MRI-CGCM3  | 1 | 0.07 | 0.14 | 0.21 | 0.27 | 0.31 | 0.36 | 0.42 | 0.48 | 0.54 | 0.59 | 0.64 | 0.69 | 0.73 | 0.76 | 0.79 | 0.82 | 0.84 | 0.86 | 0.87 | 0.89 | 0.90 | 0.91 | 0.92 | 0.92 | 0.93 | 0.95 | 0.96 | 0.97 | 0.97 | 0.98 | 0.99 | 0.99 | 1.00 | 1.00 | 1.00 |
|            | 2 | 0.10 | 0.18 | 0.26 | 0.32 | 0.37 | 0.41 | 0.46 | 0.53 | 0.58 | 0.63 | 0.68 | 0.72 | 0.76 | 0.79 | 0.82 | 0.85 | 0.87 | 0.88 | 0.90 | 0.91 | 0.92 | 0.94 | 0.94 | 0.95 | 0.95 | 0.95 | 0.96 | 0.96 | 0.97 | 0.97 | 0.98 | 0.98 | 0.99 | 1.00 | 1.00 |
|            | 3 | 0.08 | 0.14 | 0.21 | 0.28 | 0.33 | 0.38 | 0.43 | 0.46 | 0.51 | 0.55 | 0.59 | 0.62 | 0.65 | 0.68 | 0.71 | 0.74 | 0.77 | 0.78 | 0.80 | 0.81 | 0.83 | 0.84 | 0.85 | 0.86 | 0.87 | 0.87 | 0.88 | 0.88 | 0.89 | 0.90 | 0.91 | 0.93 | 0.97 | 0.99 |      |
|            | 4 | 0.08 | 0.15 | 0.22 | 0.27 | 0.33 | 0.38 | 0.42 | 0.46 | 0.51 | 0.54 | 0.58 | 0.65 | 0.68 | 0.71 | 0.73 | 0.76 | 0.77 | 0.79 | 0.80 | 0.82 | 0.83 | 0.85 | 0.86 | 0.88 | 0.88 | 0.89 | 0.91 | 0.91 | 0.93 | 0.94 | 0.95 | 0.96 | 0.97 | 0.99 |      |
|            | 5 | 0.09 | 0.16 | 0.24 | 0.30 | 0.34 | 0.40 | 0.43 | 0.48 | 0.51 | 0.54 | 0.56 | 0.60 | 0.62 | 0.65 | 0.67 | 0.70 | 0.72 | 0.74 | 0.74 | 0.76 | 0.78 | 0.81 | 0.82 | 0.84 | 0.86 | 0.88 | 0.89 | 0.90 | 0.92 | 0.94 | 0.95 | 0.96 | 0.98 | 1.00 |      |
|            | 6 | 0.10 | 0.17 | 0.25 | 0.31 | 0.36 | 0.40 | 0.44 | 0.48 | 0.52 | 0.55 | 0.59 | 0.62 | 0.65 | 0.67 | 0.68 | 0.69 | 0.71 | 0.73 | 0.75 | 0.77 | 0.79 | 0.80 | 0.81 | 0.84 | 0.85 | 0.86 | 0.88 | 0.89 | 0.91 | 0.92 | 0.94 | 0.96 | 0.99 | 1.00 | 1.00 |
| MRI-ESM1   | 1 | 0.09 | 0.17 | 0.23 | 0.27 | 0.32 | 0.38 | 0.43 | 0.49 | 0.54 | 0.58 | 0.62 | 0.67 | 0.71 | 0.74 | 0.77 | 0.79 | 0.81 | 0.83 | 0.85 | 0.87 | 0.88 | 0.89 | 0.90 | 0.91 | 0.91 | 0.93 | 0.94 | 0.95 | 0.95 | 0.96 | 0.97 | 0.97 | 0.99 | 1.00 |      |
|            | 2 | 0.10 | 0.19 | 0.25 | 0.30 | 0.35 | 0.41 | 0.48 | 0.54 | 0.59 | 0.62 | 0.66 | 0.69 | 0.72 | 0.76 | 0.78 | 0.80 | 0.82 | 0.85 | 0.87 | 0.88 | 0.89 | 0.90 | 0.92 | 0.93 | 0.95 | 0.97 | 0.98 | 0.98 | 0.99 | 0.99 | 0.99 | 1.00 | 1.00 | 1.00 |      |
|            | 3 | 0.07 | 0.14 | 0.20 | 0.25 | 0.31 | 0.34 | 0.38 | 0.42 | 0.47 | 0.51 | 0.54 | 0.58 | 0.62 | 0.65 | 0.69 | 0.73 | 0.75 | 0.78 | 0.79 | 0.82 | 0.83 | 0.85 | 0.85 | 0.86 | 0.87 | 0.88 | 0.91 | 0.92 | 0.93 | 0.95 | 0.96 | 0.97 | 0.98 | 0.99 |      |
|            | 4 | 0.09 | 0.16 | 0.21 | 0.27 | 0.33 | 0.38 | 0.43 | 0.48 | 0.52 | 0.56 | 0.59 | 0.62 | 0.65 | 0.68 | 0.71 | 0.73 | 0.74 | 0.74 | 0.75 | 0.77 | 0.80 | 0.82 | 0.84 | 0.85 | 0.86 | 0.88 | 0.90 | 0.91 | 0.92 | 0.93 | 0.95 | 0.96 | 0.97 | 0.99 |      |
|            | 5 | 0.09 | 0.17 | 0.23 | 0.28 | 0.33 | 0.37 | 0.41 | 0.45 | 0.49 | 0.54 | 0.57 | 0.60 | 0.64 | 0.66 | 0.70 | 0.73 | 0.75 | 0.77 | 0.79 | 0.81 | 0.82 | 0.83 | 0.84 | 0.85 | 0.86 | 0.88 | 0.90 | 0.91 | 0.92 | 0.93 | 0.94 | 0.95 | 0.97 | 1.00 |      |

|           |   |      |      |      |      |      |      |      |      |      |      |      |      |      |      |      |      |      |      |      |      |      |      |      |      |      |      |      |      |      |      |      |      |      |      |      |
|-----------|---|------|------|------|------|------|------|------|------|------|------|------|------|------|------|------|------|------|------|------|------|------|------|------|------|------|------|------|------|------|------|------|------|------|------|------|
| NorESM1-M | 6 | 0.10 | 0.17 | 0.24 | 0.31 | 0.36 | 0.40 | 0.45 | 0.48 | 0.52 | 0.56 | 0.59 | 0.63 | 0.66 | 0.70 | 0.73 | 0.75 | 0.78 | 0.80 | 0.83 | 0.84 | 0.84 | 0.85 | 0.87 | 0.89 | 0.90 | 0.92 | 0.93 | 0.94 | 0.95 | 0.96 | 0.97 | 0.98 | 1.00 | 1.00 | 1.00 |
|           | 1 | 0.14 | 0.28 | 0.35 | 0.40 | 0.43 | 0.44 | 0.52 | 0.53 | 0.54 | 0.56 | 0.58 | 0.60 | 0.62 | 0.65 | 0.67 | 0.69 | 0.71 | 0.72 | 0.74 | 0.78 | 0.80 | 0.83 | 0.83 | 0.85 | 0.86 | 0.87 | 0.89 | 0.90 | 0.92 | 0.94 | 0.95 | 0.96 | 0.98 | 1.00 | 1.00 |
|           | 2 | 0.13 | 0.25 | 0.36 | 0.42 | 0.46 | 0.49 | 0.56 | 0.58 | 0.60 | 0.62 | 0.64 | 0.66 | 0.68 | 0.69 | 0.71 | 0.72 | 0.73 | 0.74 | 0.75 | 0.78 | 0.80 | 0.83 | 0.86 | 0.88 | 0.89 | 0.90 | 0.91 | 0.92 | 0.93 | 0.94 | 0.95 | 0.96 | 0.98 | 0.99 | 1.00 |
|           | 3 | 0.09 | 0.18 | 0.26 | 0.32 | 0.36 | 0.38 | 0.46 | 0.48 | 0.49 | 0.51 | 0.54 | 0.56 | 0.59 | 0.62 | 0.66 | 0.69 | 0.72 | 0.74 | 0.77 | 0.79 | 0.81 | 0.83 | 0.85 | 0.86 | 0.88 | 0.89 | 0.91 | 0.92 | 0.92 | 0.93 | 0.94 | 0.96 | 0.97 | 0.98 | 1.00 |
|           | 4 | 0.09 | 0.18 | 0.27 | 0.32 | 0.37 | 0.42 | 0.45 | 0.47 | 0.55 | 0.57 | 0.59 | 0.61 | 0.62 | 0.64 | 0.66 | 0.67 | 0.69 | 0.71 | 0.74 | 0.75 | 0.77 | 0.79 | 0.81 | 0.83 | 0.86 | 0.88 | 0.89 | 0.89 | 0.90 | 0.92 | 0.93 | 0.94 | 0.96 | 0.98 | 0.99 |
|           | 5 | 0.10 | 0.20 | 0.30 | 0.37 | 0.41 | 0.46 | 0.51 | 0.54 | 0.56 | 0.58 | 0.60 | 0.62 | 0.63 | 0.65 | 0.67 | 0.69 | 0.72 | 0.74 | 0.76 | 0.78 | 0.80 | 0.82 | 0.84 | 0.86 | 0.87 | 0.88 | 0.90 | 0.92 | 0.94 | 0.95 | 0.95 | 0.96 | 0.98 | 0.99 | 1.00 |
|           | 6 | 0.10 | 0.19 | 0.27 | 0.35 | 0.39 | 0.44 | 0.49 | 0.53 | 0.57 | 0.60 | 0.62 | 0.64 | 0.66 | 0.68 | 0.70 | 0.73 | 0.75 | 0.78 | 0.81 | 0.83 | 0.84 | 0.86 | 0.88 | 0.90 | 0.91 | 0.92 | 0.92 | 0.93 | 0.95 | 0.95 | 0.96 | 0.97 | 0.98 | 1.00 | 1.00 |

**Table S4.** Area under curve (AUC) values. Numbers in the 2<sup>nd</sup> column indicate the analyzed time periods similarly to Table S1.

|              |   | 2.5  | 5    | 7.5  | 10   | 12.5 | 15   | 17.5 | 20   | 22.5 | 25   | 27.5 | 30   | 32.5 | 35   | 37.5 | 40   | 42.5 | 45   | 47.5 | 50   | 52.5 | 55   | 57.5 | 60   | 62.5 | 65   | 67.5 | 70   | 72.5 | 75   | 77.5 | 80   | 85   | 90   | 95   |      |
|--------------|---|------|------|------|------|------|------|------|------|------|------|------|------|------|------|------|------|------|------|------|------|------|------|------|------|------|------|------|------|------|------|------|------|------|------|------|------|
| ERA-20C      | 1 | 1.00 | 1.00 | 0.99 | 0.99 | 0.99 | 0.99 | 0.99 | 0.99 | 0.99 | 0.99 | 0.98 | 0.98 | 0.98 | 0.98 | 0.98 | 0.98 | 0.98 | 0.98 | 0.98 | 0.98 | 0.98 | 0.97 | 0.97 | 0.97 | 0.97 | 0.98 | 0.95 | 0.95 | 0.95 | 0.96 | 0.96 | 0.96 | 0.95 | 0.95 | 0.97 |      |
|              | 2 | 1.00 | 1.00 | 0.99 | 0.99 | 0.98 | 0.99 | 0.99 | 0.99 | 0.99 | 0.98 | 0.98 | 0.98 | 0.98 | 0.99 | 0.99 | 0.99 | 0.99 | 0.99 | 0.98 | 0.98 | 0.98 | 0.98 | 0.98 | 0.98 | 0.98 | 0.98 | 0.98 | 0.99 | 0.99 | 0.99 | 0.98 | 0.98 | 0.96 | 0.97 | 0.98 |      |
|              | 3 | 1.00 | 1.00 | 0.99 | 0.99 | 0.97 | 0.97 | 0.98 | 0.98 | 0.98 | 0.98 | 0.98 | 0.98 | 0.99 | 0.99 | 0.99 | 0.99 | 0.99 | 0.99 | 0.99 | 0.99 | 0.99 | 0.99 | 0.99 | 0.99 | 0.99 | 0.99 | 0.99 | 0.99 | 0.99 | 0.99 | 0.98 | 0.98 | 0.97 | 0.97 | 0.98 |      |
|              | 4 | 1.00 | 1.00 | 1.00 | 0.99 | 0.99 | 0.99 | 0.99 | 0.99 | 0.99 | 0.99 | 0.99 | 0.99 | 0.99 | 0.99 | 0.99 | 1.00 | 0.99 | 0.99 | 0.99 | 0.99 | 0.99 | 0.99 | 0.99 | 0.99 | 0.99 | 0.99 | 0.99 | 0.99 | 0.98 | 0.98 | 0.98 | 0.98 | 0.97 | 0.98 | 0.98 |      |
|              | 5 | 1.00 | 1.00 | 1.00 | 0.99 | 0.99 | 0.99 | 0.99 | 0.99 | 0.99 | 0.99 | 0.99 | 0.99 | 0.99 | 0.99 | 0.99 | 1.00 | 1.00 | 1.00 | 0.99 | 0.99 | 0.99 | 0.99 | 0.99 | 0.99 | 0.99 | 0.99 | 0.98 | 0.98 | 0.98 | 0.98 | 0.98 | 0.99 | 0.99 | 0.97 | 0.97 | 0.98 |
|              | 6 | 1.00 | 1.00 | 1.00 | 1.00 | 1.00 | 1.00 | 1.00 | 1.00 | 1.00 | 1.00 | 1.00 | 1.00 | 1.00 | 1.00 | 1.00 | 1.00 | 1.00 | 1.00 | 0.99 | 0.99 | 0.99 | 0.99 | 0.99 | 0.99 | 0.99 | 0.99 | 0.99 | 0.99 | 0.99 | 0.99 | 0.99 | 0.99 | 0.99 | 0.99 | 0.97 | 0.97 |
| NCEP/NCAR R1 | 1 | 0.98 | 0.95 | 0.94 | 0.94 | 0.94 | 0.94 | 0.93 | 0.92 | 0.92 | 0.92 | 0.92 | 0.92 | 0.92 | 0.91 | 0.91 | 0.90 | 0.90 | 0.90 | 0.90 | 0.89 | 0.89 | 0.89 | 0.88 | 0.88 | 0.88 | 0.88 | 0.85 | 0.85 | 0.85 | 0.85 | 0.85 | 0.85 | 0.85 | 0.85 | 0.85 | 0.87 |
|              | 2 | 0.99 | 0.98 | 0.95 | 0.95 | 0.95 | 0.94 | 0.94 | 0.93 | 0.93 | 0.93 | 0.93 | 0.93 | 0.93 | 0.92 | 0.93 | 0.93 | 0.93 | 0.93 | 0.93 | 0.93 | 0.92 | 0.92 | 0.91 | 0.90 | 0.90 | 0.89 | 0.88 | 0.88 | 0.87 | 0.86 | 0.85 | 0.86 | 0.83 | 0.83 | 0.86 |      |
|              | 3 | 1.00 | 0.98 | 0.97 | 0.96 | 0.95 | 0.94 | 0.94 | 0.93 | 0.93 | 0.93 | 0.93 | 0.93 | 0.93 | 0.93 | 0.93 | 0.92 | 0.92 | 0.92 | 0.92 | 0.92 | 0.92 | 0.92 | 0.91 | 0.91 | 0.91 | 0.90 | 0.89 | 0.88 | 0.87 | 0.86 | 0.86 | 0.86 | 0.86 | 0.85 | 0.86 |      |
|              | 4 | 1.00 | 0.99 | 0.97 | 0.96 | 0.95 | 0.95 | 0.94 | 0.94 | 0.93 | 0.93 | 0.92 | 0.92 | 0.92 | 0.91 | 0.92 | 0.92 | 0.91 | 0.91 | 0.91 | 0.91 | 0.91 | 0.91 | 0.91 | 0.91 | 0.91 | 0.91 | 0.91 | 0.91 | 0.91 | 0.91 | 0.91 | 0.91 | 0.91 | 0.91 | 0.91 | 0.92 |
|              | 5 | 1.00 | 0.99 | 0.95 | 0.91 | 0.90 | 0.89 | 0.89 | 0.89 | 0.88 | 0.88 | 0.88 | 0.88 | 0.88 | 0.89 | 0.89 | 0.89 | 0.89 | 0.89 | 0.88 | 0.88 | 0.89 | 0.89 | 0.89 | 0.89 | 0.89 | 0.89 | 0.89 | 0.89 | 0.89 | 0.88 | 0.88 | 0.88 | 0.88 | 0.89 | 0.89 | 0.91 |
|              | 6 | 1.00 | 1.00 | 0.99 | 0.95 | 0.93 | 0.92 | 0.93 | 0.92 | 0.91 | 0.91 | 0.91 | 0.91 | 0.91 | 0.91 | 0.91 | 0.91 | 0.91 | 0.91 | 0.91 | 0.91 | 0.91 | 0.91 | 0.91 | 0.91 | 0.91 | 0.91 | 0.91 | 0.91 | 0.90 | 0.90 | 0.90 | 0.90 | 0.90 | 0.89 | 0.88 | 0.89 |
| ACCESS1-0    | 1 | 0.99 | 0.96 | 0.93 | 0.90 | 0.89 | 0.89 | 0.87 | 0.87 | 0.87 | 0.86 | 0.86 | 0.85 | 0.85 | 0.85 | 0.84 | 0.84 | 0.84 | 0.84 | 0.84 | 0.84 | 0.84 | 0.84 | 0.84 | 0.84 | 0.84 | 0.84 | 0.82 | 0.82 | 0.82 | 0.82 | 0.82 | 0.82 | 0.82 | 0.82 | 0.82 | 0.83 |
|              | 2 | 0.99 | 0.97 | 0.94 | 0.92 | 0.91 | 0.90 | 0.89 | 0.89 | 0.89 | 0.89 | 0.88 | 0.88 | 0.87 | 0.87 | 0.87 | 0.87 | 0.86 | 0.86 | 0.86 | 0.86 | 0.86 | 0.85 | 0.85 | 0.83 | 0.83 | 0.83 | 0.82 | 0.82 | 0.81 | 0.81 | 0.80 | 0.81 | 0.82 | 0.81 | 0.80 |      |
|              | 3 | 0.99 | 0.98 | 0.97 | 0.96 | 0.93 | 0.93 | 0.92 | 0.91 | 0.91 | 0.90 | 0.90 | 0.90 | 0.90 | 0.90 | 0.89 | 0.89 | 0.89 | 0.88 | 0.88 | 0.88 | 0.87 | 0.87 | 0.87 | 0.87 | 0.86 | 0.86 | 0.85 | 0.85 | 0.84 | 0.84 | 0.84 | 0.85 | 0.82 | 0.81 | 0.83 |      |
|              | 4 | 1.00 | 0.99 | 0.97 | 0.96 | 0.95 | 0.95 | 0.94 | 0.93 | 0.92 | 0.91 | 0.90 | 0.89 | 0.89 | 0.89 | 0.88 | 0.88 | 0.88 | 0.87 | 0.87 | 0.87 | 0.86 | 0.86 | 0.87 | 0.87 | 0.88 | 0.88 | 0.88 | 0.89 | 0.88 | 0.88 | 0.88 | 0.86 | 0.85 | 0.84 | 0.84 |      |
|              | 5 | 1.00 | 0.99 | 0.97 | 0.94 | 0.93 | 0.92 | 0.92 | 0.91 | 0.91 | 0.90 | 0.90 | 0.90 | 0.90 | 0.90 | 0.90 | 0.89 | 0.89 | 0.89 | 0.88 | 0.88 | 0.89 | 0.89 | 0.88 | 0.89 | 0.89 | 0.90 | 0.90 | 0.91 | 0.90 | 0.90 | 0.89 | 0.89 | 0.87 | 0.87 | 0.86 |      |
|              | 6 | 1.00 | 0.99 | 0.97 | 0.94 | 0.92 | 0.92 | 0.92 | 0.91 | 0.91 | 0.91 | 0.91 | 0.91 | 0.91 | 0.91 | 0.91 | 0.91 | 0.91 | 0.91 | 0.91 | 0.91 | 0.91 | 0.91 | 0.91 | 0.91 | 0.92 | 0.92 | 0.91 | 0.91 | 0.91 | 0.91 | 0.92 | 0.91 | 0.91 | 0.90 | 0.88 | 0.87 |
| ACCESS1-3    | 1 | 0.98 | 0.94 | 0.91 | 0.88 | 0.87 | 0.86 | 0.85 | 0.85 | 0.84 | 0.84 | 0.83 | 0.82 | 0.81 | 0.81 | 0.81 | 0.80 | 0.79 | 0.79 | 0.79 | 0.78 | 0.78 | 0.78 | 0.77 | 0.78 | 0.78 | 0.77 | 0.76 | 0.76 | 0.75 | 0.75 | 0.75 | 0.76 | 0.73 | 0.72 | 0.74 |      |
|              | 2 | 0.99 | 0.97 | 0.93 | 0.90 | 0.89 | 0.88 | 0.87 | 0.86 | 0.85 | 0.84 | 0.83 | 0.82 | 0.81 | 0.79 | 0.79 | 0.78 | 0.77 | 0.77 | 0.76 | 0.76 | 0.75 | 0.75 | 0.75 | 0.75 | 0.75 | 0.74 | 0.74 | 0.73 | 0.72 | 0.70 | 0.68 | 0.68 | 0.71 | 0.69 | 0.69 |      |
|              | 3 | 0.99 | 0.96 | 0.91 | 0.87 | 0.84 | 0.83 | 0.82 | 0.82 | 0.80 | 0.79 | 0.78 | 0.78 | 0.77 | 0.76 | 0.75 | 0.75 | 0.74 | 0.73 | 0.73 | 0.73 | 0.73 | 0.72 | 0.72 | 0.71 | 0.71 | 0.70 | 0.70 | 0.69 | 0.69 | 0.68 | 0.69 | 0.69 | 0.71 | 0.70 | 0.73 |      |
|              | 4 | 1.00 | 0.98 | 0.93 | 0.90 | 0.87 | 0.85 | 0.83 | 0.82 | 0.81 | 0.80 | 0.80 | 0.79 | 0.78 | 0.77 | 0.76 | 0.76 | 0.75 | 0.74 | 0.73 | 0.73 | 0.72 | 0.72 | 0.72 | 0.71 | 0.71 | 0.70 | 0.70 | 0.70 | 0.69 | 0.69 | 0.69 | 0.68 | 0.71 | 0.73 | 0.78 |      |
|              | 5 | 1.00 | 0.99 | 0.91 | 0.84 | 0.81 | 0.79 | 0.78 | 0.77 | 0.76 | 0.77 | 0.76 | 0.76 | 0.76 | 0.76 | 0.76 | 0.75 | 0.75 | 0.75 | 0.74 | 0.74 | 0.74 | 0.73 | 0.72 | 0.72 | 0.72 | 0.72 | 0.71 | 0.72 | 0.71 | 0.71 | 0.70 | 0.70 | 0.75 | 0.76 | 0.80 |      |
|              | 6 | 1.00 | 1.00 | 0.98 | 0.89 | 0.84 | 0.81 | 0.79 | 0.77 | 0.76 | 0.76 | 0.77 | 0.76 | 0.76 | 0.76 | 0.75 | 0.75 | 0.74 | 0.74 | 0.73 | 0.72 | 0.72 | 0.71 | 0.71 | 0.70 | 0.70 | 0.69 | 0.69 | 0.69 | 0.68 | 0.68 | 0.68 | 0.67 | 0.66 | 0.74 | 0.82 |      |
| CCSM4        | 1 | 0.98 | 0.94 | 0.91 | 0.88 | 0.87 | 0.86 | 0.85 | 0.85 | 0.84 | 0.84 | 0.83 | 0.82 | 0.81 | 0.81 | 0.81 | 0.80 | 0.79 | 0.79 | 0.79 | 0.78 | 0.78 | 0.78 | 0.77 | 0.78 | 0.78 | 0.77 | 0.76 | 0.76 | 0.75 | 0.75 | 0.75 | 0.76 | 0.73 | 0.72 | 0.74 |      |
|              | 2 | 0.99 | 0.97 | 0.93 | 0.90 | 0.89 | 0.88 | 0.87 | 0.86 | 0.85 | 0.84 | 0.83 | 0.82 | 0.81 | 0.79 | 0.79 | 0.78 | 0.77 | 0.77 | 0.76 | 0.76 | 0.75 | 0.75 | 0.75 | 0.75 | 0.75 | 0.74 | 0.74 | 0.73 | 0.72 | 0.70 | 0.68 | 0.68 | 0.71 | 0.69 | 0.69 |      |
|              | 3 | 0.99 | 0.96 | 0.91 | 0.87 | 0.84 | 0.83 | 0.82 | 0.82 | 0.80 | 0.79 | 0.78 | 0.78 | 0.77 | 0.76 | 0.75 | 0.75 | 0.74 | 0.73 | 0.73 | 0.73 | 0.73 | 0.72 | 0.72 | 0.71 | 0.71 | 0.70 | 0.70 | 0.69 | 0.69 | 0.68 | 0.69 | 0.69 | 0.71 | 0.70 | 0.73 |      |

|            |   |      |      |      |      |      |      |      |      |      |      |      |      |      |      |      |      |      |      |      |      |      |      |      |      |      |      |      |      |      |      |      |      |      |      |      |      |
|------------|---|------|------|------|------|------|------|------|------|------|------|------|------|------|------|------|------|------|------|------|------|------|------|------|------|------|------|------|------|------|------|------|------|------|------|------|------|
|            | 4 | 1.00 | 0.98 | 0.93 | 0.90 | 0.87 | 0.85 | 0.83 | 0.82 | 0.81 | 0.80 | 0.80 | 0.79 | 0.78 | 0.77 | 0.76 | 0.76 | 0.75 | 0.75 | 0.74 | 0.73 | 0.73 | 0.72 | 0.72 | 0.72 | 0.71 | 0.71 | 0.70 | 0.70 | 0.69 | 0.69 | 0.69 | 0.68 | 0.71 | 0.73 | 0.78 |      |
|            | 5 | 1.00 | 0.99 | 0.91 | 0.84 | 0.81 | 0.79 | 0.78 | 0.77 | 0.76 | 0.77 | 0.76 | 0.76 | 0.76 | 0.76 | 0.76 | 0.75 | 0.75 | 0.75 | 0.74 | 0.74 | 0.74 | 0.73 | 0.72 | 0.72 | 0.72 | 0.71 | 0.71 | 0.71 | 0.72 | 0.71 | 0.70 | 0.70 | 0.75 | 0.76 | 0.80 |      |
|            | 6 | 1.00 | 1.00 | 0.98 | 0.89 | 0.84 | 0.81 | 0.79 | 0.77 | 0.76 | 0.76 | 0.77 | 0.76 | 0.76 | 0.76 | 0.75 | 0.75 | 0.74 | 0.74 | 0.73 | 0.72 | 0.72 | 0.71 | 0.71 | 0.70 | 0.70 | 0.69 | 0.69 | 0.69 | 0.68 | 0.68 | 0.68 | 0.67 | 0.66 | 0.74 | 0.82 |      |
| CMCC-CM    | 1 | 0.98 | 0.95 | 0.92 | 0.91 | 0.90 | 0.90 | 0.89 | 0.89 | 0.88 | 0.88 | 0.88 | 0.87 | 0.87 | 0.87 | 0.87 | 0.87 | 0.87 | 0.87 | 0.87 | 0.87 | 0.87 | 0.87 | 0.87 | 0.88 | 0.88 | 0.88 | 0.83 | 0.83 | 0.83 | 0.83 | 0.83 | 0.84 | 0.83 | 0.83 | 0.84 |      |
|            | 2 | 0.99 | 0.96 | 0.95 | 0.94 | 0.94 | 0.93 | 0.93 | 0.92 | 0.92 | 0.92 | 0.92 | 0.91 | 0.91 | 0.91 | 0.91 | 0.91 | 0.91 | 0.91 | 0.91 | 0.91 | 0.91 | 0.90 | 0.90 | 0.90 | 0.89 | 0.89 | 0.89 | 0.89 | 0.89 | 0.89 | 0.88 | 0.89 | 0.84 | 0.84 | 0.84 |      |
|            | 3 | 1.00 | 0.97 | 0.95 | 0.93 | 0.92 | 0.91 | 0.91 | 0.91 | 0.91 | 0.91 | 0.91 | 0.91 | 0.91 | 0.91 | 0.91 | 0.91 | 0.91 | 0.91 | 0.91 | 0.91 | 0.90 | 0.90 | 0.91 | 0.91 | 0.90 | 0.90 | 0.90 | 0.90 | 0.89 | 0.89 | 0.88 | 0.88 | 0.89 | 0.84 | 0.83 | 0.84 |
|            | 4 | 1.00 | 0.99 | 0.98 | 0.97 | 0.96 | 0.95 | 0.95 | 0.95 | 0.95 | 0.94 | 0.94 | 0.94 | 0.93 | 0.93 | 0.93 | 0.93 | 0.92 | 0.92 | 0.92 | 0.92 | 0.91 | 0.91 | 0.91 | 0.91 | 0.92 | 0.92 | 0.92 | 0.92 | 0.92 | 0.92 | 0.91 | 0.90 | 0.86 | 0.86 | 0.85 |      |
|            | 5 | 0.99 | 0.99 | 0.97 | 0.95 | 0.93 | 0.93 | 0.92 | 0.92 | 0.92 | 0.93 | 0.92 | 0.92 | 0.92 | 0.92 | 0.92 | 0.92 | 0.91 | 0.91 | 0.91 | 0.91 | 0.90 | 0.90 | 0.90 | 0.90 | 0.90 | 0.90 | 0.90 | 0.90 | 0.90 | 0.90 | 0.87 | 0.87 | 0.87 | 0.86 | 0.84 | 0.83 |
|            | 6 | 0.99 | 0.99 | 0.98 | 0.94 | 0.93 | 0.93 | 0.93 | 0.93 | 0.92 | 0.93 | 0.93 | 0.93 | 0.93 | 0.92 | 0.92 | 0.92 | 0.91 | 0.91 | 0.91 | 0.91 | 0.90 | 0.90 | 0.90 | 0.90 | 0.90 | 0.90 | 0.90 | 0.90 | 0.88 | 0.87 | 0.87 | 0.87 | 0.87 | 0.87 | 0.84 | 0.82 |
| CMCC-CMS   | 1 | 0.99 | 0.97 | 0.96 | 0.95 | 0.95 | 0.94 | 0.94 | 0.94 | 0.93 | 0.93 | 0.92 | 0.92 | 0.92 | 0.92 | 0.91 | 0.91 | 0.90 | 0.90 | 0.90 | 0.89 | 0.89 | 0.89 | 0.88 | 0.88 | 0.88 | 0.88 | 0.86 | 0.86 | 0.86 | 0.85 | 0.85 | 0.85 | 0.84 | 0.83 | 0.82 |      |
|            | 2 | 0.98 | 0.97 | 0.95 | 0.94 | 0.93 | 0.93 | 0.93 | 0.92 | 0.92 | 0.92 | 0.91 | 0.91 | 0.90 | 0.90 | 0.90 | 0.90 | 0.90 | 0.90 | 0.89 | 0.89 | 0.88 | 0.88 | 0.87 | 0.87 | 0.86 | 0.85 | 0.85 | 0.84 | 0.83 | 0.82 | 0.81 | 0.80 | 0.82 | 0.81 | 0.78 |      |
|            | 3 | 0.99 | 0.97 | 0.95 | 0.94 | 0.93 | 0.92 | 0.92 | 0.91 | 0.91 | 0.91 | 0.90 | 0.90 | 0.90 | 0.89 | 0.89 | 0.88 | 0.88 | 0.88 | 0.88 | 0.88 | 0.88 | 0.88 | 0.87 | 0.87 | 0.87 | 0.86 | 0.86 | 0.86 | 0.86 | 0.86 | 0.85 | 0.84 | 0.84 | 0.84 | 0.85 | 0.84 |
|            | 4 | 0.98 | 0.95 | 0.94 | 0.93 | 0.92 | 0.92 | 0.91 | 0.91 | 0.90 | 0.90 | 0.90 | 0.90 | 0.89 | 0.89 | 0.89 | 0.88 | 0.88 | 0.88 | 0.87 | 0.87 | 0.86 | 0.86 | 0.86 | 0.86 | 0.86 | 0.86 | 0.86 | 0.86 | 0.86 | 0.87 | 0.86 | 0.86 | 0.85 | 0.85 | 0.87 | 0.87 |
|            | 5 | 0.99 | 0.98 | 0.96 | 0.94 | 0.92 | 0.92 | 0.91 | 0.91 | 0.90 | 0.90 | 0.90 | 0.90 | 0.90 | 0.90 | 0.90 | 0.89 | 0.88 | 0.88 | 0.87 | 0.87 | 0.87 | 0.86 | 0.86 | 0.85 | 0.85 | 0.85 | 0.85 | 0.85 | 0.85 | 0.82 | 0.82 | 0.81 | 0.81 | 0.83 | 0.83 |      |
|            | 6 | 0.99 | 0.99 | 0.96 | 0.93 | 0.92 | 0.91 | 0.91 | 0.91 | 0.91 | 0.90 | 0.90 | 0.90 | 0.91 | 0.90 | 0.90 | 0.90 | 0.89 | 0.89 | 0.89 | 0.89 | 0.88 | 0.88 | 0.88 | 0.88 | 0.88 | 0.85 | 0.85 | 0.85 | 0.85 | 0.84 | 0.85 | 0.84 | 0.84 | 0.84 | 0.84 | 0.85 |
| CNRM-CM5   | 1 | 0.97 | 0.94 | 0.92 | 0.91 | 0.89 | 0.88 | 0.89 | 0.89 | 0.88 | 0.88 | 0.88 | 0.88 | 0.88 | 0.88 | 0.87 | 0.87 | 0.87 | 0.87 | 0.87 | 0.86 | 0.87 | 0.86 | 0.86 | 0.86 | 0.87 | 0.87 | 0.83 | 0.83 | 0.83 | 0.84 | 0.84 | 0.84 | 0.82 | 0.83 | 0.87 |      |
|            | 2 | 0.99 | 0.96 | 0.95 | 0.93 | 0.92 | 0.92 | 0.91 | 0.90 | 0.89 | 0.89 | 0.89 | 0.89 | 0.88 | 0.88 | 0.89 | 0.89 | 0.89 | 0.90 | 0.89 | 0.89 | 0.89 | 0.89 | 0.89 | 0.88 | 0.87 | 0.87 | 0.87 | 0.87 | 0.86 | 0.86 | 0.86 | 0.85 | 0.85 | 0.82 | 0.82 |      |
|            | 3 | 1.00 | 0.97 | 0.95 | 0.94 | 0.94 | 0.93 | 0.93 | 0.92 | 0.91 | 0.91 | 0.91 | 0.91 | 0.90 | 0.91 | 0.90 | 0.90 | 0.90 | 0.90 | 0.90 | 0.90 | 0.90 | 0.90 | 0.90 | 0.90 | 0.90 | 0.89 | 0.89 | 0.88 | 0.88 | 0.88 | 0.88 | 0.88 | 0.86 | 0.85 | 0.87 |      |
|            | 4 | 1.00 | 0.97 | 0.95 | 0.93 | 0.92 | 0.92 | 0.91 | 0.91 | 0.90 | 0.89 | 0.90 | 0.90 | 0.90 | 0.89 | 0.89 | 0.89 | 0.89 | 0.89 | 0.88 | 0.88 | 0.88 | 0.88 | 0.88 | 0.88 | 0.88 | 0.88 | 0.88 | 0.88 | 0.88 | 0.88 | 0.87 | 0.87 | 0.85 | 0.85 | 0.84 |      |
|            | 5 | 1.00 | 0.99 | 0.95 | 0.93 | 0.90 | 0.90 | 0.90 | 0.89 | 0.89 | 0.89 | 0.89 | 0.88 | 0.88 | 0.88 | 0.88 | 0.88 | 0.88 | 0.88 | 0.88 | 0.88 | 0.88 | 0.88 | 0.88 | 0.88 | 0.88 | 0.88 | 0.89 | 0.89 | 0.90 | 0.87 | 0.87 | 0.86 | 0.86 | 0.85 | 0.86 |      |
|            | 6 | 1.00 | 0.98 | 0.95 | 0.91 | 0.90 | 0.89 | 0.89 | 0.88 | 0.88 | 0.88 | 0.88 | 0.88 | 0.88 | 0.88 | 0.88 | 0.88 | 0.88 | 0.88 | 0.88 | 0.88 | 0.88 | 0.88 | 0.88 | 0.88 | 0.89 | 0.89 | 0.89 | 0.86 | 0.86 | 0.86 | 0.86 | 0.86 | 0.85 | 0.84 | 0.86 |      |
| GFDL-CM3   | 1 | 0.96 | 0.91 | 0.88 | 0.86 | 0.86 | 0.85 | 0.85 | 0.84 | 0.84 | 0.84 | 0.83 | 0.82 | 0.81 | 0.80 | 0.80 | 0.79 | 0.79 | 0.79 | 0.79 | 0.79 | 0.79 | 0.80 | 0.80 | 0.81 | 0.81 | 0.81 | 0.79 | 0.79 | 0.79 | 0.79 | 0.79 | 0.79 | 0.80 | 0.82 |      |      |
|            | 2 | 0.96 | 0.95 | 0.92 | 0.90 | 0.89 | 0.88 | 0.88 | 0.87 | 0.87 | 0.86 | 0.85 | 0.84 | 0.83 | 0.82 | 0.82 | 0.81 | 0.81 | 0.81 | 0.80 | 0.80 | 0.80 | 0.81 | 0.81 | 0.82 | 0.83 | 0.83 | 0.84 | 0.84 | 0.85 | 0.85 | 0.84 | 0.84 | 0.85 | 0.88 |      |      |
|            | 3 | 0.97 | 0.95 | 0.92 | 0.90 | 0.89 | 0.88 | 0.88 | 0.87 | 0.87 | 0.86 | 0.86 | 0.85 | 0.84 | 0.84 | 0.84 | 0.83 | 0.83 | 0.83 | 0.83 | 0.83 | 0.83 | 0.83 | 0.83 | 0.83 | 0.83 | 0.83 | 0.83 | 0.82 | 0.83 | 0.82 | 0.82 | 0.82 | 0.83 | 0.85 |      |      |
|            | 4 | 0.98 | 0.95 | 0.92 | 0.90 | 0.89 | 0.88 | 0.87 | 0.87 | 0.86 | 0.86 | 0.87 | 0.86 | 0.86 | 0.86 | 0.86 | 0.86 | 0.86 | 0.86 | 0.85 | 0.85 | 0.85 | 0.85 | 0.85 | 0.85 | 0.85 | 0.85 | 0.86 | 0.86 | 0.85 | 0.85 | 0.85 | 0.86 | 0.86 | 0.89 |      |      |
|            | 5 | 0.98 | 0.97 | 0.92 | 0.88 | 0.86 | 0.86 | 0.85 | 0.84 | 0.84 | 0.85 | 0.84 | 0.85 | 0.85 | 0.85 | 0.86 | 0.86 | 0.85 | 0.86 | 0.85 | 0.85 | 0.85 | 0.85 | 0.85 | 0.85 | 0.84 | 0.84 | 0.84 | 0.84 | 0.86 | 0.86 | 0.87 | 0.88 | 0.86 | 0.87 |      |      |
|            | 6 | 0.98 | 0.97 | 0.94 | 0.89 | 0.88 | 0.87 | 0.87 | 0.87 | 0.86 | 0.86 | 0.86 | 0.86 | 0.87 | 0.87 | 0.86 | 0.86 | 0.86 | 0.86 | 0.86 | 0.86 | 0.86 | 0.86 | 0.86 | 0.85 | 0.85 | 0.85 | 0.85 | 0.85 | 0.85 | 0.85 | 0.85 | 0.85 | 0.86 | 0.83 |      |      |
| GFDL-ESM2G | 1 | 1.00 | 0.97 | 0.94 | 0.92 | 0.91 | 0.90 | 0.90 | 0.89 | 0.89 | 0.88 | 0.87 | 0.87 | 0.87 | 0.87 | 0.87 | 0.86 | 0.86 | 0.86 | 0.85 | 0.85 | 0.85 | 0.85 | 0.85 | 0.86 | 0.86 | 0.87 | 0.86 | 0.86 | 0.85 | 0.86 | 0.86 | 0.86 | 0.84 | 0.83 |      |      |
|            | 2 | 1.00 | 0.99 | 0.96 | 0.94 | 0.92 | 0.91 | 0.91 | 0.90 | 0.89 | 0.89 | 0.88 | 0.88 | 0.88 | 0.88 | 0.88 | 0.88 | 0.88 | 0.87 | 0.86 | 0.86 | 0.86 | 0.86 | 0.85 | 0.83 | 0.83 | 0.82 | 0.82 | 0.81 | 0.81 | 0.80 | 0.79 | 0.79 | 0.79 | 0.82 |      |      |
|            | 3 | 1.00 | 0.98 | 0.95 | 0.92 | 0.91 | 0.90 | 0.89 | 0.89 | 0.89 | 0.89 | 0.89 | 0.88 | 0.88 | 0.88 | 0.88 | 0.88 | 0.88 | 0.87 | 0.87 | 0.87 | 0.87 | 0.86 | 0.86 | 0.85 | 0.85 | 0.85 | 0.84 | 0.82 | 0.81 | 0.80 | 0.80 | 0.80 | 0.79 | 0.78 |      |      |
|            | 4 | 1.00 | 0.98 | 0.94 | 0.91 | 0.90 | 0.89 | 0.88 | 0.86 | 0.86 | 0.85 | 0.85 | 0.85 | 0.85 | 0.85 | 0.85 | 0.84 | 0.84 | 0.83 | 0.83 | 0.83 | 0.82 | 0.82 | 0.81 | 0.81 | 0.80 | 0.80 | 0.81 | 0.80 | 0.80 | 0.79 | 0.79 | 0.77 | 0.78 | 0.77 |      |      |



|              |   |      |      |      |      |      |      |      |      |      |      |      |      |      |      |      |      |      |      |      |      |      |      |      |      |      |      |      |      |      |      |      |      |      |      |      |
|--------------|---|------|------|------|------|------|------|------|------|------|------|------|------|------|------|------|------|------|------|------|------|------|------|------|------|------|------|------|------|------|------|------|------|------|------|------|
|              | 5 | 1.00 | 0.98 | 0.94 | 0.90 | 0.88 | 0.88 | 0.86 | 0.86 | 0.86 | 0.86 | 0.85 | 0.86 | 0.86 | 0.85 | 0.85 | 0.85 | 0.85 | 0.84 | 0.84 | 0.84 | 0.84 | 0.84 | 0.83 | 0.83 | 0.83 | 0.83 | 0.80 | 0.79 | 0.79 | 0.79 | 0.79 | 0.81 | 0.82 |      |      |
|              | 6 | 0.99 | 0.97 | 0.94 | 0.89 | 0.87 | 0.87 | 0.87 | 0.87 | 0.86 | 0.87 | 0.87 | 0.87 | 0.86 | 0.86 | 0.86 | 0.86 | 0.86 | 0.86 | 0.86 | 0.86 | 0.86 | 0.85 | 0.85 | 0.85 | 0.82 | 0.82 | 0.81 | 0.81 | 0.81 | 0.80 | 0.79 | 0.78 | 0.80 | 0.82 |      |
| GFDL-ESM2M   | 1 | 0.99 | 0.97 | 0.95 | 0.93 | 0.91 | 0.90 | 0.87 | 0.86 | 0.86 | 0.85 | 0.84 | 0.84 | 0.84 | 0.83 | 0.83 | 0.83 | 0.82 | 0.82 | 0.82 | 0.82 | 0.82 | 0.81 | 0.82 | 0.82 | 0.82 | 0.79 | 0.79 | 0.78 | 0.78 | 0.79 | 0.79 | 0.77 | 0.77 | 0.78 |      |
|              | 2 | 1.00 | 0.99 | 0.96 | 0.95 | 0.94 | 0.93 | 0.91 | 0.90 | 0.89 | 0.89 | 0.88 | 0.87 | 0.86 | 0.86 | 0.86 | 0.86 | 0.86 | 0.86 | 0.85 | 0.85 | 0.85 | 0.85 | 0.85 | 0.84 | 0.84 | 0.84 | 0.85 | 0.85 | 0.85 | 0.85 | 0.85 | 0.82 | 0.82 | 0.84 |      |
|              | 3 | 1.00 | 0.99 | 0.97 | 0.95 | 0.93 | 0.91 | 0.89 | 0.88 | 0.87 | 0.85 | 0.85 | 0.84 | 0.83 | 0.83 | 0.82 | 0.81 | 0.81 | 0.81 | 0.81 | 0.81 | 0.80 | 0.80 | 0.80 | 0.80 | 0.80 | 0.80 | 0.81 | 0.81 | 0.81 | 0.81 | 0.81 | 0.79 | 0.82 | 0.85 |      |
|              | 4 | 1.00 | 0.99 | 0.97 | 0.95 | 0.94 | 0.93 | 0.91 | 0.90 | 0.89 | 0.88 | 0.87 | 0.86 | 0.86 | 0.85 | 0.85 | 0.85 | 0.85 | 0.85 | 0.85 | 0.84 | 0.84 | 0.84 | 0.85 | 0.85 | 0.85 | 0.85 | 0.84 | 0.85 | 0.85 | 0.85 | 0.86 | 0.84 | 0.86 | 0.89 |      |
|              | 5 | 1.00 | 1.00 | 0.95 | 0.90 | 0.87 | 0.87 | 0.85 | 0.85 | 0.84 | 0.85 | 0.84 | 0.84 | 0.85 | 0.85 | 0.86 | 0.86 | 0.86 | 0.86 | 0.86 | 0.86 | 0.86 | 0.86 | 0.86 | 0.86 | 0.86 | 0.86 | 0.85 | 0.85 | 0.87 | 0.87 | 0.87 | 0.88 | 0.86 | 0.87 | 0.86 |
|              | 6 | 1.00 | 1.00 | 0.99 | 0.93 | 0.90 | 0.88 | 0.87 | 0.87 | 0.86 | 0.86 | 0.86 | 0.87 | 0.87 | 0.88 | 0.88 | 0.88 | 0.88 | 0.88 | 0.88 | 0.88 | 0.88 | 0.88 | 0.88 | 0.88 | 0.88 | 0.88 | 0.88 | 0.88 | 0.88 | 0.87 | 0.87 | 0.87 | 0.87 | 0.86 | 0.85 |
| HadGEM2-AO   | 1 | 0.89 | 0.83 | 0.80 | 0.79 | 0.76 | 0.76 | 0.77 | 0.77 | 0.76 | 0.76 | 0.75 | 0.75 | 0.75 | 0.75 | 0.74 | 0.74 | 0.73 | 0.74 | 0.74 | 0.74 | 0.74 | 0.74 | 0.75 | 0.75 | 0.76 | 0.76 | 0.76 | 0.76 | 0.77 | 0.77 | 0.77 | 0.78 | 0.79 | 0.77 |      |
|              | 2 | 0.86 | 0.84 | 0.81 | 0.79 | 0.78 | 0.76 | 0.74 | 0.74 | 0.73 | 0.73 | 0.73 | 0.72 | 0.71 | 0.71 | 0.71 | 0.70 | 0.70 | 0.69 | 0.69 | 0.69 | 0.69 | 0.68 | 0.66 | 0.65 | 0.64 | 0.63 | 0.62 | 0.61 | 0.60 | 0.59 | 0.58 | 0.62 | 0.60 | 0.58 |      |
|              | 3 | 0.77 | 0.79 | 0.79 | 0.79 | 0.80 | 0.81 | 0.80 | 0.80 | 0.79 | 0.78 | 0.78 | 0.77 | 0.77 | 0.76 | 0.76 | 0.75 | 0.75 | 0.75 | 0.74 | 0.74 | 0.74 | 0.73 | 0.73 | 0.72 | 0.72 | 0.71 | 0.70 | 0.69 | 0.68 | 0.67 | 0.67 | 0.67 | 0.68 | 0.68 | 0.71 |
|              | 4 | 0.95 | 0.90 | 0.88 | 0.85 | 0.84 | 0.82 | 0.80 | 0.78 | 0.76 | 0.74 | 0.75 | 0.75 | 0.75 | 0.75 | 0.74 | 0.74 | 0.74 | 0.74 | 0.74 | 0.74 | 0.73 | 0.73 | 0.73 | 0.73 | 0.73 | 0.73 | 0.72 | 0.72 | 0.72 | 0.71 | 0.71 | 0.70 | 0.77 | 0.78 | 0.79 |
|              | 5 | 0.99 | 0.93 | 0.90 | 0.86 | 0.84 | 0.83 | 0.82 | 0.82 | 0.81 | 0.81 | 0.79 | 0.79 | 0.79 | 0.79 | 0.79 | 0.79 | 0.79 | 0.79 | 0.79 | 0.78 | 0.78 | 0.77 | 0.77 | 0.77 | 0.76 | 0.76 | 0.75 | 0.76 | 0.74 | 0.73 | 0.73 | 0.72 | 0.76 | 0.78 | 0.81 |
|              | 6 | 1.00 | 0.96 | 0.93 | 0.91 | 0.90 | 0.89 | 0.89 | 0.88 | 0.87 | 0.87 | 0.87 | 0.86 | 0.86 | 0.86 | 0.86 | 0.86 | 0.86 | 0.85 | 0.85 | 0.85 | 0.85 | 0.84 | 0.84 | 0.84 | 0.82 | 0.82 | 0.81 | 0.81 | 0.80 | 0.79 | 0.78 | 0.76 | 0.78 | 0.79 |      |
| HadGEM2-CC   | 1 | 0.98 | 0.95 | 0.94 | 0.94 | 0.94 | 0.95 | 0.94 | 0.93 | 0.93 | 0.93 | 0.93 | 0.93 | 0.93 | 0.92 | 0.92 | 0.92 | 0.92 | 0.92 | 0.91 | 0.91 | 0.91 | 0.91 | 0.92 | 0.92 | 0.92 | 0.89 | 0.89 | 0.89 | 0.90 | 0.90 | 0.90 | 0.90 | 0.91 | 0.93 |      |
|              | 2 | 0.98 | 0.96 | 0.94 | 0.93 | 0.93 | 0.94 | 0.94 | 0.93 | 0.93 | 0.93 | 0.93 | 0.93 | 0.93 | 0.93 | 0.94 | 0.94 | 0.94 | 0.94 | 0.94 | 0.94 | 0.94 | 0.94 | 0.93 | 0.92 | 0.92 | 0.92 | 0.92 | 0.91 | 0.91 | 0.91 | 0.92 | 0.91 | 0.91 | 0.92 |      |
|              | 3 | 0.99 | 0.98 | 0.97 | 0.96 | 0.95 | 0.94 | 0.94 | 0.93 | 0.93 | 0.93 | 0.93 | 0.94 | 0.94 | 0.94 | 0.94 | 0.94 | 0.95 | 0.95 | 0.94 | 0.94 | 0.94 | 0.93 | 0.93 | 0.93 | 0.92 | 0.92 | 0.91 | 0.90 | 0.89 | 0.88 | 0.88 | 0.88 | 0.86 | 0.87 | 0.87 |
|              | 4 | 1.00 | 0.98 | 0.97 | 0.96 | 0.96 | 0.96 | 0.96 | 0.95 | 0.95 | 0.94 | 0.93 | 0.93 | 0.93 | 0.93 | 0.93 | 0.92 | 0.92 | 0.92 | 0.91 | 0.91 | 0.91 | 0.91 | 0.91 | 0.91 | 0.91 | 0.90 | 0.90 | 0.89 | 0.88 | 0.88 | 0.87 | 0.87 | 0.86 | 0.85 |      |
|              | 5 | 1.00 | 0.99 | 0.97 | 0.95 | 0.94 | 0.93 | 0.93 | 0.93 | 0.93 | 0.93 | 0.92 | 0.93 | 0.93 | 0.93 | 0.93 | 0.93 | 0.92 | 0.92 | 0.92 | 0.92 | 0.92 | 0.91 | 0.91 | 0.91 | 0.91 | 0.90 | 0.90 | 0.89 | 0.86 | 0.85 | 0.83 | 0.82 | 0.83 | 0.83 | 0.85 |
|              | 6 | 1.00 | 0.99 | 0.98 | 0.96 | 0.94 | 0.94 | 0.94 | 0.93 | 0.93 | 0.93 | 0.93 | 0.93 | 0.93 | 0.93 | 0.93 | 0.92 | 0.92 | 0.92 | 0.92 | 0.92 | 0.91 | 0.91 | 0.91 | 0.90 | 0.90 | 0.87 | 0.86 | 0.86 | 0.85 | 0.84 | 0.83 | 0.82 | 0.80 | 0.82 | 0.84 |
| IPSL-CM5A-MR | 1 | 0.98 | 0.95 | 0.92 | 0.90 | 0.89 | 0.88 | 0.88 | 0.87 | 0.87 | 0.86 | 0.86 | 0.85 | 0.85 | 0.84 | 0.84 | 0.83 | 0.83 | 0.82 | 0.82 | 0.82 | 0.82 | 0.81 | 0.80 | 0.80 | 0.80 | 0.77 | 0.77 | 0.77 | 0.77 | 0.77 | 0.77 | 0.78 | 0.81 | 0.85 |      |
|              | 2 | 0.98 | 0.95 | 0.94 | 0.92 | 0.91 | 0.90 | 0.90 | 0.89 | 0.88 | 0.88 | 0.88 | 0.87 | 0.87 | 0.86 | 0.86 | 0.85 | 0.85 | 0.86 | 0.85 | 0.84 | 0.84 | 0.83 | 0.83 | 0.83 | 0.83 | 0.82 | 0.82 | 0.81 | 0.80 | 0.80 | 0.80 | 0.81 | 0.82 | 0.85 |      |
|              | 3 | 0.99 | 0.97 | 0.95 | 0.94 | 0.93 | 0.92 | 0.91 | 0.91 | 0.90 | 0.89 | 0.89 | 0.89 | 0.88 | 0.88 | 0.87 | 0.87 | 0.87 | 0.86 | 0.86 | 0.85 | 0.85 | 0.85 | 0.85 | 0.84 | 0.84 | 0.83 | 0.82 | 0.81 | 0.80 | 0.79 | 0.78 | 0.79 | 0.79 | 0.79 | 0.82 |
|              | 4 | 0.99 | 0.96 | 0.95 | 0.94 | 0.93 | 0.92 | 0.92 | 0.91 | 0.90 | 0.89 | 0.89 | 0.88 | 0.87 | 0.87 | 0.86 | 0.86 | 0.85 | 0.85 | 0.84 | 0.84 | 0.83 | 0.83 | 0.83 | 0.82 | 0.82 | 0.82 | 0.82 | 0.82 | 0.81 | 0.81 | 0.81 | 0.80 | 0.79 | 0.78 | 0.79 |
|              | 5 | 0.99 | 0.98 | 0.96 | 0.92 | 0.90 | 0.90 | 0.89 | 0.89 | 0.88 | 0.88 | 0.87 | 0.87 | 0.87 | 0.87 | 0.88 | 0.88 | 0.87 | 0.87 | 0.87 | 0.87 | 0.87 | 0.87 | 0.87 | 0.87 | 0.87 | 0.87 | 0.87 | 0.86 | 0.85 | 0.86 | 0.86 | 0.85 | 0.85 | 0.84 |      |
|              | 6 | 0.99 | 0.98 | 0.96 | 0.93 | 0.91 | 0.90 | 0.90 | 0.90 | 0.89 | 0.89 | 0.89 | 0.89 | 0.89 | 0.89 | 0.89 | 0.89 | 0.88 | 0.88 | 0.88 | 0.88 | 0.88 | 0.88 | 0.87 | 0.87 | 0.87 | 0.85 | 0.86 | 0.85 | 0.85 | 0.85 | 0.84 | 0.84 | 0.83 | 0.82 | 0.84 |
| MIROC5       | 1 | 0.96 | 0.91 | 0.88 | 0.87 | 0.86 | 0.85 | 0.84 | 0.82 | 0.81 | 0.80 | 0.79 | 0.77 | 0.77 | 0.76 | 0.75 | 0.75 | 0.74 | 0.74 | 0.74 | 0.74 | 0.74 | 0.75 | 0.75 | 0.74 | 0.74 | 0.70 | 0.70 | 0.70 | 0.69 | 0.69 | 0.68 | 0.72 | 0.76 | 0.81 |      |
|              | 2 | 0.96 | 0.93 | 0.92 | 0.91 | 0.91 | 0.91 | 0.90 | 0.89 | 0.88 | 0.87 | 0.86 | 0.84 | 0.84 | 0.83 | 0.82 | 0.82 | 0.82 | 0.81 | 0.81 | 0.80 | 0.80 | 0.80 | 0.80 | 0.82 | 0.82 | 0.82 | 0.82 | 0.83 | 0.83 | 0.84 | 0.84 | 0.83 | 0.81 | 0.84 | 0.87 |
|              | 3 | 0.98 | 0.96 | 0.93 | 0.91 | 0.90 | 0.88 | 0.88 | 0.87 | 0.87 | 0.86 | 0.86 | 0.86 | 0.85 | 0.85 | 0.84 | 0.84 | 0.83 | 0.83 | 0.83 | 0.83 | 0.83 | 0.83 | 0.83 | 0.83 | 0.83 | 0.83 | 0.83 | 0.83 | 0.83 | 0.82 | 0.82 | 0.80 | 0.84 | 0.86 |      |

|            |   |      |      |      |      |      |      |      |      |      |      |      |      |      |      |      |      |      |      |      |      |      |      |      |      |      |      |      |      |      |      |      |      |      |      |      |
|------------|---|------|------|------|------|------|------|------|------|------|------|------|------|------|------|------|------|------|------|------|------|------|------|------|------|------|------|------|------|------|------|------|------|------|------|------|
|            | 4 | 0.99 | 0.97 | 0.94 | 0.92 | 0.91 | 0.91 | 0.90 | 0.90 | 0.89 | 0.88 | 0.87 | 0.86 | 0.85 | 0.85 | 0.84 | 0.84 | 0.84 | 0.83 | 0.83 | 0.83 | 0.83 | 0.83 | 0.83 | 0.83 | 0.83 | 0.83 | 0.83 | 0.84 | 0.84 | 0.86 | 0.82 | 0.85 | 0.84 |      |      |
|            | 5 | 0.99 | 0.98 | 0.94 | 0.89 | 0.86 | 0.86 | 0.86 | 0.86 | 0.86 | 0.86 | 0.86 | 0.86 | 0.86 | 0.86 | 0.86 | 0.86 | 0.85 | 0.85 | 0.85 | 0.85 | 0.85 | 0.85 | 0.85 | 0.84 | 0.84 | 0.84 | 0.84 | 0.87 | 0.87 | 0.88 | 0.89 | 0.87 | 0.88 | 0.87 |      |
|            | 6 | 0.99 | 0.99 | 0.96 | 0.91 | 0.89 | 0.88 | 0.88 | 0.88 | 0.87 | 0.87 | 0.87 | 0.86 | 0.86 | 0.85 | 0.85 | 0.85 | 0.84 | 0.84 | 0.83 | 0.83 | 0.82 | 0.82 | 0.82 | 0.81 | 0.81 | 0.83 | 0.83 | 0.83 | 0.84 | 0.84 | 0.84 | 0.84 | 0.85 | 0.83 | 0.83 |
| MPI-ESM-LR | 1 | 1.00 | 0.97 | 0.95 | 0.94 | 0.93 | 0.93 | 0.93 | 0.93 | 0.93 | 0.92 | 0.92 | 0.91 | 0.91 | 0.91 | 0.91 | 0.91 | 0.91 | 0.90 | 0.90 | 0.90 | 0.90 | 0.89 | 0.89 | 0.89 | 0.89 | 0.87 | 0.87 | 0.87 | 0.87 | 0.88 | 0.89 | 0.88 | 0.88 | 0.90 |      |
|            | 2 | 1.00 | 0.99 | 0.97 | 0.95 | 0.94 | 0.94 | 0.94 | 0.94 | 0.93 | 0.93 | 0.93 | 0.93 | 0.92 | 0.92 | 0.92 | 0.92 | 0.92 | 0.92 | 0.92 | 0.92 | 0.91 | 0.91 | 0.88 | 0.88 | 0.87 | 0.87 | 0.87 | 0.87 | 0.86 | 0.86 | 0.86 | 0.84 | 0.84 | 0.86 |      |
|            | 3 | 1.00 | 0.99 | 0.97 | 0.95 | 0.93 | 0.93 | 0.93 | 0.92 | 0.92 | 0.91 | 0.92 | 0.92 | 0.92 | 0.91 | 0.91 | 0.91 | 0.90 | 0.90 | 0.90 | 0.90 | 0.89 | 0.89 | 0.89 | 0.89 | 0.88 | 0.88 | 0.87 | 0.87 | 0.86 | 0.86 | 0.86 | 0.84 | 0.83 | 0.87 |      |
|            | 4 | 1.00 | 0.98 | 0.96 | 0.94 | 0.92 | 0.91 | 0.91 | 0.91 | 0.90 | 0.90 | 0.90 | 0.90 | 0.90 | 0.90 | 0.89 | 0.89 | 0.88 | 0.88 | 0.88 | 0.87 | 0.87 | 0.86 | 0.87 | 0.87 | 0.86 | 0.87 | 0.87 | 0.87 | 0.87 | 0.87 | 0.87 | 0.86 | 0.87 | 0.88 | 0.90 |
|            | 5 | 1.00 | 0.99 | 0.97 | 0.95 | 0.94 | 0.93 | 0.91 | 0.91 | 0.90 | 0.91 | 0.90 | 0.90 | 0.90 | 0.90 | 0.90 | 0.89 | 0.89 | 0.88 | 0.88 | 0.88 | 0.88 | 0.88 | 0.88 | 0.88 | 0.88 | 0.88 | 0.88 | 0.86 | 0.85 | 0.85 | 0.85 | 0.85 | 0.86 | 0.87 | 0.89 |
|            | 6 | .99  | 0.99 | 0.98 | 0.97 | 0.96 | 0.95 | 0.94 | 0.94 | 0.93 | 0.93 | 0.93 | 0.93 | 0.93 | 0.92 | 0.92 | 0.92 | 0.92 | 0.92 | 0.91 | 0.91 | 0.91 | 0.91 | 0.91 | 0.91 | 0.91 | 0.91 | 0.91 | 0.88 | 0.88 | 0.87 | 0.87 | 0.87 | 0.86 | 0.84 | 0.84 |
| MPI-ESM-MR | 1 | 1.00 | 0.98 | 0.96 | 0.94 | 0.91 | 0.90 | 0.90 | 0.89 | 0.89 | 0.89 | 0.88 | 0.88 | 0.88 | 0.88 | 0.88 | 0.88 | 0.87 | 0.87 | 0.87 | 0.87 | 0.88 | 0.88 | 0.87 | 0.88 | 0.89 | 0.89 | 0.89 | 0.89 | 0.89 | 0.90 | 0.90 | 0.91 | 0.89 | 0.89 | 0.90 |
|            | 2 | 0.99 | 0.98 | 0.97 | 0.95 | 0.94 | 0.92 | 0.91 | 0.91 | 0.90 | 0.89 | 0.88 | 0.88 | 0.87 | 0.87 | 0.87 | 0.87 | 0.87 | 0.87 | 0.87 | 0.87 | 0.88 | 0.87 | 0.85 | 0.85 | 0.84 | 0.84 | 0.84 | 0.84 | 0.83 | 0.83 | 0.83 | 0.83 | 0.83 | 0.87 |      |
|            | 3 | 1.00 | 0.97 | 0.96 | 0.95 | 0.94 | 0.93 | 0.92 | 0.91 | 0.90 | 0.89 | 0.89 | 0.89 | 0.88 | 0.88 | 0.87 | 0.87 | 0.87 | 0.86 | 0.86 | 0.86 | 0.86 | 0.85 | 0.85 | 0.85 | 0.85 | 0.84 | 0.84 | 0.83 | 0.82 | 0.82 | 0.82 | 0.81 | 0.81 | 0.83 |      |
|            | 4 | 0.99 | 0.98 | 0.95 | 0.94 | 0.92 | 0.90 | 0.89 | 0.89 | 0.88 | 0.87 | 0.88 | 0.87 | 0.87 | 0.87 | 0.86 | 0.86 | 0.85 | 0.85 | 0.85 | 0.85 | 0.84 | 0.84 | 0.84 | 0.84 | 0.84 | 0.84 | 0.84 | 0.84 | 0.84 | 0.84 | 0.83 | 0.81 | 0.80 | 0.79 |      |
|            | 5 | 0.99 | 0.98 | 0.95 | 0.94 | 0.92 | 0.91 | 0.91 | 0.90 | 0.90 | 0.91 | 0.90 | 0.91 | 0.91 | 0.91 | 0.90 | 0.90 | 0.89 | 0.88 | 0.88 | 0.88 | 0.88 | 0.87 | 0.87 | 0.86 | 0.86 | 0.86 | 0.86 | 0.86 | 0.82 | 0.81 | 0.80 | 0.80 | 0.79 | 0.81 | 0.83 |
|            | 6 | 0.99 | 0.98 | 0.95 | 0.91 | 0.90 | 0.89 | 0.88 | 0.88 | 0.87 | 0.87 | 0.87 | 0.87 | 0.87 | 0.87 | 0.86 | 0.86 | 0.85 | 0.85 | 0.85 | 0.84 | 0.84 | 0.83 | 0.83 | 0.83 | 0.83 | 0.79 | 0.79 | 0.78 | 0.78 | 0.77 | 0.76 | 0.75 | 0.74 | 0.76 | 0.81 |
| MPI-ESM-P  | 1 | 1.00 | 0.99 | 0.97 | 0.96 | 0.93 | 0.91 | 0.91 | 0.90 | 0.90 | 0.89 | 0.89 | 0.89 | 0.89 | 0.89 | 0.89 | 0.89 | 0.89 | 0.89 | 0.89 | 0.89 | 0.89 | 0.89 | 0.89 | 0.90 | 0.88 | 0.88 | 0.88 | 0.89 | 0.89 | 0.89 | 0.89 | 0.90 | 0.90 |      |      |
|            | 2 | 1.00 | 0.99 | 0.98 | 0.96 | 0.95 | 0.93 | 0.92 | 0.92 | 0.91 | 0.91 | 0.91 | 0.91 | 0.90 | 0.90 | 0.90 | 0.90 | 0.90 | 0.90 | 0.90 | 0.90 | 0.90 | 0.87 | 0.87 | 0.87 | 0.87 | 0.87 | 0.86 | 0.86 | 0.86 | 0.86 | 0.82 | 0.82 | 0.84 |      |      |
|            | 3 | 1.00 | 0.98 | 0.96 | 0.94 | 0.93 | 0.92 | 0.92 | 0.92 | 0.92 | 0.92 | 0.92 | 0.92 | 0.91 | 0.91 | 0.90 | 0.90 | 0.90 | 0.89 | 0.89 | 0.89 | 0.89 | 0.89 | 0.89 | 0.89 | 0.89 | 0.88 | 0.88 | 0.88 | 0.88 | 0.88 | 0.86 | 0.85 | 0.86 |      |      |
|            | 4 | 1.00 | 0.98 | 0.95 | 0.93 | 0.91 | 0.90 | 0.89 | 0.88 | 0.87 | 0.87 | 0.88 | 0.88 | 0.88 | 0.88 | 0.87 | 0.87 | 0.87 | 0.86 | 0.86 | 0.86 | 0.85 | 0.85 | 0.85 | 0.85 | 0.85 | 0.85 | 0.85 | 0.85 | 0.85 | 0.85 | 0.83 | 0.82 | 0.81 | 0.80 |      |
|            | 5 | 0.99 | 0.98 | 0.96 | 0.94 | 0.92 | 0.91 | 0.90 | 0.89 | 0.88 | 0.89 | 0.89 | 0.89 | 0.89 | 0.89 | 0.88 | 0.88 | 0.87 | 0.87 | 0.87 | 0.86 | 0.86 | 0.86 | 0.85 | 0.85 | 0.85 | 0.86 | 0.85 | 0.85 | 0.83 | 0.82 | 0.82 | 0.81 | 0.79 | 0.80 | 0.82 |
|            | 6 | 0.99 | 0.97 | 0.95 | 0.92 | 0.91 | 0.89 | 0.89 | 0.88 | 0.88 | 0.88 | 0.88 | 0.88 | 0.88 | 0.87 | 0.87 | 0.86 | 0.86 | 0.86 | 0.86 | 0.86 | 0.85 | 0.85 | 0.85 | 0.85 | 0.82 | 0.81 | 0.81 | 0.80 | 0.80 | 0.80 | 0.79 | 0.77 | 0.75 | 0.75 |      |
| MRI-CGCM3  | 1 | 0.91 | 0.88 | 0.87 | 0.86 | 0.84 | 0.83 | 0.82 | 0.81 | 0.81 | 0.80 | 0.80 | 0.79 | 0.78 | 0.77 | 0.77 | 0.77 | 0.76 | 0.76 | 0.76 | 0.76 | 0.76 | 0.75 | 0.76 | 0.76 | 0.76 | 0.75 | 0.75 | 0.75 | 0.75 | 0.76 | 0.76 | 0.74 | 0.75 | 0.79 |      |
|            | 2 | 0.95 | 0.93 | 0.91 | 0.90 | 0.89 | 0.88 | 0.88 | 0.85 | 0.85 | 0.84 | 0.82 | 0.81 | 0.80 | 0.80 | 0.80 | 0.80 | 0.80 | 0.80 | 0.80 | 0.80 | 0.80 | 0.80 | 0.80 | 0.80 | 0.80 | 0.80 | 0.80 | 0.79 | 0.79 | 0.79 | 0.80 | 0.80 | 0.79 | 0.81 |      |
|            | 3 | 0.95 | 0.94 | 0.93 | 0.91 | 0.89 | 0.87 | 0.85 | 0.83 | 0.82 | 0.81 | 0.80 | 0.79 | 0.79 | 0.78 | 0.78 | 0.78 | 0.78 | 0.78 | 0.78 | 0.79 | 0.79 | 0.79 | 0.79 | 0.80 | 0.80 | 0.80 | 0.80 | 0.80 | 0.79 | 0.80 | 0.81 | 0.79 | 0.76 | 0.76 |      |
|            | 4 | 0.97 | 0.95 | 0.93 | 0.92 | 0.91 | 0.90 | 0.88 | 0.87 | 0.85 | 0.83 | 0.82 | 0.81 | 0.80 | 0.80 | 0.79 | 0.79 | 0.78 | 0.78 | 0.77 | 0.77 | 0.76 | 0.76 | 0.77 | 0.76 | 0.77 | 0.77 | 0.77 | 0.77 | 0.76 | 0.76 | 0.75 | 0.73 | 0.73 | 0.73 | 0.77 |
|            | 5 | 0.96 | 0.95 | 0.92 | 0.88 | 0.85 | 0.84 | 0.82 | 0.81 | 0.80 | 0.78 | 0.77 | 0.76 | 0.76 | 0.76 | 0.76 | 0.76 | 0.76 | 0.75 | 0.75 | 0.76 | 0.76 | 0.76 | 0.76 | 0.76 | 0.77 | 0.77 | 0.77 | 0.77 | 0.74 | 0.73 | 0.73 | 0.72 | 0.76 | 0.76 | 0.81 |
|            | 6 | 0.98 | 0.96 | 0.92 | 0.86 | 0.83 | 0.82 | 0.82 | 0.81 | 0.80 | 0.79 | 0.78 | 0.78 | 0.77 | 0.77 | 0.76 | 0.76 | 0.75 | 0.75 | 0.75 | 0.75 | 0.74 | 0.73 | 0.73 | 0.73 | 0.73 | 0.70 | 0.70 | 0.69 | 0.68 | 0.68 | 0.68 | 0.67 | 0.65 | 0.71 | 0.76 |
| MRI-ESM1   | 1 | 0.96 | 0.90 | 0.86 | 0.83 | 0.83 | 0.82 | 0.81 | 0.80 | 0.80 | 0.79 | 0.78 | 0.77 | 0.76 | 0.75 | 0.74 | 0.74 | 0.73 | 0.72 | 0.72 | 0.72 | 0.73 | 0.73 | 0.73 | 0.73 | 0.72 | 0.72 | 0.71 | 0.72 | 0.72 | 0.73 | 0.72 | 0.74 | 0.80 |      |      |
|            | 2 | 0.97 | 0.95 | 0.90 | 0.88 | 0.86 | 0.86 | 0.86 | 0.84 | 0.84 | 0.83 | 0.82 | 0.82 | 0.81 | 0.80 | 0.80 | 0.79 | 0.79 | 0.79 | 0.78 | 0.78 | 0.77 | 0.77 | 0.77 | 0.75 | 0.76 | 0.75 | 0.75 | 0.75 | 0.74 | 0.74 | 0.74 | 0.73 | 0.74 | 0.77 |      |
|            | 3 | 0.97 | 0.93 | 0.89 | 0.86 | 0.84 | 0.83 | 0.82 | 0.82 | 0.81 | 0.80 | 0.80 | 0.79 | 0.78 | 0.78 | 0.77 | 0.77 | 0.77 | 0.76 | 0.75 | 0.75 | 0.75 | 0.75 | 0.74 | 0.74 | 0.74 | 0.73 | 0.73 | 0.72 | 0.72 | 0.73 | 0.73 | 0.75 | 0.74 | 0.74 |      |
|            | 4 | 0.98 | 0.94 | 0.89 | 0.86 | 0.85 | 0.84 | 0.83 | 0.82 | 0.81 | 0.80 | 0.80 | 0.80 | 0.79 | 0.79 | 0.78 | 0.77 | 0.76 | 0.76 | 0.74 | 0.73 | 0.73 | 0.73 | 0.72 | 0.72 | 0.72 | 0.72 | 0.72 | 0.73 | 0.72 | 0.72 | 0.71 | 0.69 | 0.72 | 0.73 | 0.75 |

|           |   |      |      |      |      |      |      |      |      |      |      |      |      |      |      |      |      |      |      |      |      |      |      |      |      |      |      |      |      |      |      |      |      |      |      |      |
|-----------|---|------|------|------|------|------|------|------|------|------|------|------|------|------|------|------|------|------|------|------|------|------|------|------|------|------|------|------|------|------|------|------|------|------|------|------|
| NorESM1-M | 5 | 0.97 | 0.96 | 0.90 | 0.86 | 0.83 | 0.82 | 0.80 | 0.79 | 0.79 | 0.79 | 0.78 | 0.78 | 0.78 | 0.78 | 0.78 | 0.77 | 0.76 | 0.76 | 0.75 | 0.75 | 0.75 | 0.75 | 0.74 | 0.75 | 0.75 | 0.75 | 0.75 | 0.76 | 0.73 | 0.73 | 0.73 | 0.73 | 0.75 | 0.75 | 0.77 |
|           | 6 | 0.98 | 0.97 | 0.94 | 0.88 | 0.85 | 0.84 | 0.83 | 0.83 | 0.82 | 0.82 | 0.82 | 0.82 | 0.81 | 0.81 | 0.80 | 0.80 | 0.80 | 0.80 | 0.79 | 0.79 | 0.79 | 0.78 | 0.78 | 0.78 | 0.78 | 0.75 | 0.75 | 0.75 | 0.74 | 0.74 | 0.73 | 0.72 | 0.71 | 0.74 | 0.76 |
|           | 1 | 1.00 | 0.96 | 0.90 | 0.86 | 0.82 | 0.79 | 0.79 | 0.78 | 0.78 | 0.77 | 0.76 | 0.76 | 0.75 | 0.74 | 0.74 | 0.74 | 0.74 | 0.73 | 0.73 | 0.73 | 0.73 | 0.73 | 0.73 | 0.73 | 0.73 | 0.72 | 0.72 | 0.72 | 0.71 | 0.70 | 0.70 | 0.69 | 0.71 | 0.75 | 0.80 |
|           | 2 | 1.00 | 1.00 | 0.94 | 0.89 | 0.86 | 0.84 | 0.83 | 0.82 | 0.81 | 0.80 | 0.79 | 0.78 | 0.77 | 0.77 | 0.76 | 0.76 | 0.76 | 0.75 | 0.74 | 0.74 | 0.73 | 0.73 | 0.73 | 0.74 | 0.75 | 0.75 | 0.75 | 0.75 | 0.74 | 0.74 | 0.73 | 0.72 | 0.75 | 0.76 | 0.77 |
|           | 3 | 1.00 | 0.96 | 0.90 | 0.86 | 0.85 | 0.84 | 0.83 | 0.82 | 0.81 | 0.81 | 0.80 | 0.79 | 0.79 | 0.78 | 0.77 | 0.77 | 0.77 | 0.76 | 0.75 | 0.75 | 0.76 | 0.75 | 0.75 | 0.75 | 0.74 | 0.74 | 0.74 | 0.74 | 0.74 | 0.73 | 0.73 | 0.73 | 0.73 | 0.77 | 0.81 |
|           | 4 | 1.00 | 0.98 | 0.92 | 0.89 | 0.86 | 0.85 | 0.83 | 0.81 | 0.80 | 0.80 | 0.80 | 0.79 | 0.79 | 0.78 | 0.78 | 0.78 | 0.77 | 0.77 | 0.76 | 0.76 | 0.76 | 0.75 | 0.75 | 0.75 | 0.74 | 0.74 | 0.74 | 0.74 | 0.73 | 0.74 | 0.74 | 0.76 | 0.76 | 0.80 | 0.81 |
|           | 5 | 1.00 | 1.00 | 0.93 | 0.88 | 0.86 | 0.85 | 0.83 | 0.82 | 0.81 | 0.81 | 0.81 | 0.80 | 0.80 | 0.80 | 0.80 | 0.80 | 0.80 | 0.80 | 0.79 | 0.79 | 0.79 | 0.78 | 0.78 | 0.78 | 0.77 | 0.77 | 0.76 | 0.76 | 0.78 | 0.79 | 0.79 | 0.80 | 0.82 | 0.84 | 0.85 |
|           | 6 | 1.00 | 0.99 | 0.97 | 0.92 | 0.88 | 0.86 | 0.84 | 0.84 | 0.82 | 0.83 | 0.83 | 0.83 | 0.83 | 0.83 | 0.83 | 0.83 | 0.82 | 0.82 | 0.81 | 0.82 | 0.81 | 0.81 | 0.81 | 0.81 | 0.80 | 0.77 | 0.77 | 0.77 | 0.77 | 0.77 | 0.77 | 0.76 | 0.76 | 0.78 | 0.83 |

**Table S5.** Values of the Matthews correlation coefficients (MCC). Numbers in 2<sup>nd</sup> column indicate the analyzed time periods similarly to Table S1. The reference CP maps obtained from the ERA-20C are associated with the following percentiles: 17.5% (in period 1); 20% (2); 27.5% (3,4); 25% (5,6).

|              |   | 2.5  | 5    | 7.5  | 10   | 12.5 | 15   | 17.5 | 20   | 22.5 | 25   | 27.5 | 30   | 32.5 | 35   | 37.5 | 40   | 42.5 | 45   | 47.5 | 50   | 52.5 | 55   | 57.5 | 60   | 62.5 | 65   | 67.5 | 70   | 72.5 | 75   | 77.5 | 80   | 85   | 90   | 95   |
|--------------|---|------|------|------|------|------|------|------|------|------|------|------|------|------|------|------|------|------|------|------|------|------|------|------|------|------|------|------|------|------|------|------|------|------|------|------|
| ERA-20C      | 1 | 0.35 | 0.50 | 0.62 | 0.71 | 0.80 | 0.89 | 1.00 | 0.92 | 0.86 | 0.80 | 0.75 | 0.70 | 0.66 | 0.63 | 0.59 | 0.57 | 0.54 | 0.51 | 0.48 | 0.46 | 0.44 | 0.42 | 0.40 | 0.38 | 0.36 | 0.34 | 0.30 | 0.30 | 0.28 | 0.27 | 0.25 | 0.23 | 0.19 | 0.15 | 0.11 |
|              | 2 | 0.32 | 0.46 | 0.57 | 0.67 | 0.76 | 0.84 | 0.92 | 1.00 | 0.93 | 0.87 | 0.81 | 0.76 | 0.72 | 0.68 | 0.65 | 0.61 | 0.58 | 0.56 | 0.53 | 0.50 | 0.48 | 0.46 | 0.44 | 0.41 | 0.39 | 0.37 | 0.35 | 0.33 | 0.31 | 0.29 | 0.27 | 0.25 | 0.20 | 0.17 | 0.11 |
|              | 3 | 0.26 | 0.37 | 0.45 | 0.53 | 0.61 | 0.68 | 0.75 | 0.81 | 0.88 | 0.94 | 1.00 | 0.94 | 0.89 | 0.84 | 0.80 | 0.75 | 0.72 | 0.68 | 0.65 | 0.62 | 0.59 | 0.56 | 0.53 | 0.50 | 0.48 | 0.45 | 0.43 | 0.40 | 0.38 | 0.36 | 0.34 | 0.31 | 0.26 | 0.21 | 0.14 |
|              | 4 | 0.26 | 0.37 | 0.46 | 0.53 | 0.60 | 0.66 | 0.72 | 0.78 | 0.83 | 0.90 | 1.00 | 0.94 | 0.89 | 0.84 | 0.80 | 0.75 | 0.72 | 0.68 | 0.65 | 0.62 | 0.59 | 0.56 | 0.53 | 0.50 | 0.48 | 0.45 | 0.43 | 0.41 | 0.38 | 0.36 | 0.34 | 0.31 | 0.26 | 0.21 | 0.14 |
|              | 5 | 0.28 | 0.40 | 0.50 | 0.58 | 0.65 | 0.72 | 0.79 | 0.85 | 0.91 | 1.00 | 0.93 | 0.87 | 0.82 | 0.78 | 0.74 | 0.70 | 0.67 | 0.63 | 0.60 | 0.57 | 0.54 | 0.52 | 0.49 | 0.47 | 0.45 | 0.43 | 0.41 | 0.39 | 0.35 | 0.33 | 0.31 | 0.29 | 0.23 | 0.19 | 0.13 |
|              | 6 | 0.28 | 0.40 | 0.49 | 0.58 | 0.65 | 0.72 | 0.79 | 0.85 | 0.91 | 1.00 | 0.94 | 0.88 | 0.83 | 0.79 | 0.75 | 0.71 | 0.67 | 0.64 | 0.61 | 0.58 | 0.55 | 0.53 | 0.50 | 0.48 | 0.46 | 0.42 | 0.40 | 0.38 | 0.36 | 0.33 | 0.31 | 0.29 | 0.24 | 0.19 | 0.13 |
| NCEP/NCAR R1 | 1 | 0.35 | 0.50 | 0.61 | 0.70 | 0.76 | 0.80 | 0.83 | 0.82 | 0.79 | 0.75 | 0.72 | 0.69 | 0.66 | 0.63 | 0.60 | 0.57 | 0.54 | 0.51 | 0.48 | 0.46 | 0.44 | 0.42 | 0.40 | 0.38 | 0.36 | 0.34 | 0.32 | 0.30 | 0.28 | 0.27 | 0.25 | 0.23 | 0.18 | 0.15 | 0.11 |
|              | 2 | 0.32 | 0.46 | 0.57 | 0.65 | 0.72 | 0.78 | 0.81 | 0.83 | 0.82 | 0.80 | 0.77 | 0.73 | 0.70 | 0.67 | 0.64 | 0.61 | 0.58 | 0.55 | 0.53 | 0.50 | 0.48 | 0.45 | 0.43 | 0.41 | 0.39 | 0.37 | 0.35 | 0.33 | 0.31 | 0.29 | 0.27 | 0.25 | 0.21 | 0.17 | 0.09 |
|              | 3 | 0.26 | 0.37 | 0.45 | 0.52 | 0.59 | 0.65 | 0.70 | 0.75 | 0.78 | 0.79 | 0.79 | 0.79 | 0.80 | 0.81 | 0.77 | 0.74 | 0.70 | 0.67 | 0.64 | 0.61 | 0.58 | 0.56 | 0.53 | 0.50 | 0.48 | 0.45 | 0.43 | 0.41 | 0.38 | 0.36 | 0.33 | 0.31 | 0.26 | 0.19 | 0.14 |
|              | 4 | 0.26 | 0.37 | 0.45 | 0.53 | 0.60 | 0.66 | 0.72 | 0.77 | 0.80 | 0.86 | 0.87 | 0.86 | 0.84 | 0.81 | 0.78 | 0.75 | 0.71 | 0.68 | 0.65 | 0.62 | 0.59 | 0.56 | 0.53 | 0.50 | 0.48 | 0.46 | 0.44 | 0.41 | 0.38 | 0.36 | 0.33 | 0.31 | 0.26 | 0.19 | 0.14 |
|              | 5 | 0.28 | 0.40 | 0.49 | 0.57 | 0.64 | 0.70 | 0.76 | 0.81 | 0.84 | 0.85 | 0.84 | 0.85 | 0.81 | 0.77 | 0.73 | 0.70 | 0.67 | 0.63 | 0.60 | 0.57 | 0.54 | 0.52 | 0.50 | 0.48 | 0.45 | 0.42 | 0.40 | 0.37 | 0.35 | 0.33 | 0.31 | 0.29 | 0.24 | 0.19 | 0.13 |
|              | 6 | 0.28 | 0.40 | 0.49 | 0.58 | 0.65 | 0.72 | 0.78 | 0.84 | 0.89 | 0.90 | 0.88 | 0.88 | 0.83 | 0.79 | 0.75 | 0.71 | 0.67 | 0.64 | 0.61 | 0.58 | 0.55 | 0.53 | 0.50 | 0.48 | 0.45 | 0.43 | 0.40 | 0.38 | 0.36 | 0.33 | 0.31 | 0.29 | 0.24 | 0.19 | 0.12 |
| ACCESS1-0    | 1 | 0.30 | 0.36 | 0.46 | 0.51 | 0.54 | 0.57 | 0.58 | 0.59 | 0.59 | 0.60 | 0.58 | 0.57 | 0.55 | 0.54 | 0.52 | 0.51 | 0.49 | 0.48 | 0.47 | 0.45 | 0.44 | 0.42 | 0.40 | 0.38 | 0.36 | 0.34 | 0.32 | 0.31 | 0.29 | 0.27 | 0.25 | 0.23 | 0.19 | 0.15 | 0.11 |
|              | 2 | 0.32 | 0.43 | 0.52 | 0.57 | 0.58 | 0.59 | 0.60 | 0.61 | 0.61 | 0.61 | 0.59 | 0.57 | 0.55 | 0.54 | 0.55 | 0.54 | 0.53 | 0.51 | 0.49 | 0.47 | 0.45 | 0.43 | 0.41 | 0.39 | 0.37 | 0.35 | 0.33 | 0.31 | 0.29 | 0.27 | 0.25 | 0.21 | 0.17 | 0.11 |      |
|              | 3 | 0.26 | 0.37 | 0.42 | 0.46 | 0.51 | 0.52 | 0.52 | 0.54 | 0.55 | 0.57 | 0.59 | 0.60 | 0.63 | 0.65 | 0.65 | 0.64 | 0.63 | 0.63 | 0.62 | 0.60 | 0.58 | 0.55 | 0.53 | 0.50 | 0.48 | 0.46 | 0.42 | 0.41 | 0.39 | 0.36 | 0.34 | 0.31 | 0.27 | 0.21 | 0.14 |
|              | 4 | 0.26 | 0.37 | 0.44 | 0.49 | 0.52 | 0.54 | 0.56 | 0.56 | 0.57 | 0.58 | 0.60 | 0.61 | 0.62 | 0.62 | 0.61 | 0.61 | 0.59 | 0.59 | 0.57 | 0.56 | 0.54 | 0.52 | 0.50 | 0.47 | 0.45 | 0.43 | 0.40 | 0.38 | 0.36 | 0.32 | 0.31 | 0.27 | 0.21 | 0.14 |      |
|              | 5 | 0.28 | 0.40 | 0.45 | 0.47 | 0.49 | 0.49 | 0.48 | 0.47 | 0.46 | 0.44 | 0.43 | 0.46 | 0.46 | 0.47 | 0.48 | 0.49 | 0.49 | 0.50 | 0.50 | 0.50 | 0.50 | 0.49 | 0.47 | 0.46 | 0.44 | 0.42 | 0.40 | 0.35 | 0.35 | 0.33 | 0.31 | 0.29 | 0.25 | 0.19 | 0.13 |
|              | 6 | 0.28 | 0.40 | 0.48 | 0.50 | 0.51 | 0.51 | 0.52 | 0.52 | 0.53 | 0.54 | 0.54 | 0.56 | 0.56 | 0.57 | 0.58 | 0.57 | 0.56 | 0.56 | 0.56 | 0.54 | 0.53 | 0.51 | 0.49 | 0.47 | 0.45 | 0.42 | 0.40 | 0.38 | 0.36 | 0.34 | 0.32 | 0.29 | 0.25 | 0.20 | 0.13 |
| ACCESS1-3    | 1 | 0.29 | 0.37 | 0.42 | 0.46 | 0.46 | 0.48 | 0.49 | 0.48 | 0.47 | 0.46 | 0.45 | 0.44 | 0.43 | 0.42 | 0.42 | 0.42 | 0.42 | 0.41 | 0.40 | 0.40 | 0.39 | 0.37 | 0.36 | 0.34 | 0.33 | 0.31 | 0.30 | 0.27 | 0.27 | 0.26 | 0.24 | 0.22 | 0.19 | 0.15 | 0.10 |
|              | 2 | 0.29 | 0.38 | 0.43 | 0.46 | 0.49 | 0.52 | 0.53 | 0.53 | 0.53 | 0.52 | 0.51 | 0.50 | 0.49 | 0.48 | 0.47 | 0.46 | 0.45 | 0.45 | 0.44 | 0.43 | 0.42 | 0.42 | 0.40 | 0.37 | 0.37 | 0.36 | 0.34 | 0.32 | 0.30 | 0.28 | 0.27 | 0.25 | 0.21 | 0.17 | 0.11 |
|              | 3 | 0.26 | 0.33 | 0.38 | 0.42 | 0.44 | 0.46 | 0.49 | 0.52 | 0.53 | 0.53 | 0.55 | 0.56 | 0.57 | 0.59 | 0.59 | 0.59 | 0.59 | 0.58 | 0.57 | 0.56 | 0.54 | 0.52 | 0.50 | 0.48 | 0.46 | 0.44 | 0.42 | 0.39 | 0.37 | 0.34 | 0.32 | 0.30 | 0.26 | 0.21 | 0.14 |
|              | 4 | 0.26 | 0.35 | 0.41 | 0.44 | 0.48 | 0.51 | 0.53 | 0.55 | 0.54 | 0.55 | 0.54 | 0.54 | 0.54 | 0.54 | 0.55 | 0.55 | 0.55 | 0.55 | 0.55 | 0.54 | 0.52 | 0.50 | 0.49 | 0.47 | 0.45 | 0.43 | 0.41 | 0.39 | 0.37 | 0.35 | 0.33 | 0.31 | 0.27 | 0.21 | 0.14 |
|              | 5 | 0.28 | 0.39 | 0.43 | 0.45 | 0.47 | 0.48 | 0.50 | 0.50 | 0.51 | 0.52 | 0.51 | 0.52 | 0.53 | 0.54 | 0.56 | 0.56 | 0.55 | 0.55 | 0.54 | 0.53 | 0.51 | 0.50 | 0.48 | 0.46 | 0.44 | 0.43 | 0.41 | 0.39 | 0.36 | 0.33 | 0.31 | 0.29 | 0.24 | 0.19 | 0.13 |
|              | 6 | 0.28 | 0.39 | 0.44 | 0.45 | 0.47 | 0.49 | 0.52 | 0.53 | 0.54 | 0.55 | 0.56 | 0.57 | 0.58 | 0.59 | 0.58 | 0.58 | 0.57 | 0.56 | 0.55 | 0.54 | 0.52 | 0.51 | 0.49 | 0.47 | 0.44 | 0.43 | 0.41 | 0.39 | 0.36 | 0.34 | 0.32 | 0.30 | 0.24 | 0.19 | 0.13 |
| CCSM4        | 1 | 0.35 | 0.42 | 0.45 | 0.43 | 0.42 | 0.44 | 0.44 | 0.45 | 0.45 | 0.46 | 0.45 | 0.44 | 0.44 | 0.42 | 0.41 | 0.39 | 0.38 | 0.36 | 0.35 | 0.35 | 0.34 | 0.32 | 0.31 | 0.30 | 0.30 | 0.29 | 0.28 | 0.27 | 0.26 | 0.25 | 0.24 | 0.23 | 0.19 | 0.15 | 0.11 |
|              | 2 | 0.32 | 0.45 | 0.48 | 0.47 | 0.47 | 0.50 | 0.52 | 0.52 | 0.53 | 0.52 | 0.51 | 0.50 | 0.47 | 0.45 | 0.44 | 0.42 | 0.39 | 0.38 | 0.37 | 0.37 | 0.35 | 0.34 | 0.33 | 0.32 | 0.31 | 0.29 | 0.29 | 0.28 | 0.27 | 0.26 | 0.24 | 0.23 | 0.20 | 0.16 | 0.12 |
|              | 3 | 0.26 | 0.37 | 0.42 | 0.41 | 0.40 | 0.38 | 0.40 | 0.40 | 0.40 | 0.40 | 0.39 | 0.39 | 0.39 | 0.38 | 0.38 | 0.36 | 0.35 | 0.32 | 0.31 | 0.31 | 0.30 | 0.29 | 0.29 | 0.28 | 0.28 | 0.26 | 0.26 | 0.26 | 0.26 | 0.26 | 0.25 | 0.26 | 0.23 | 0.18 | 0.13 |
|              | 4 | 0.26 | 0.37 | 0.40 | 0.40 | 0.41 | 0.42 | 0.43 | 0.44 | 0.46 | 0.45 | 0.45 | 0.43 | 0.42 | 0.41 | 0.41 | 0.40 | 0.38 | 0.37 | 0.36 | 0.35 | 0.32 | 0.31 | 0.31 | 0.30 | 0.29 | 0.28 | 0.27 | 0.26 | 0.26 | 0.24 | 0.23 | 0.22 | 0.20 | 0.17 | 0.11 |



|            |   |      |      |      |      |      |      |      |      |      |      |      |      |      |      |      |      |      |      |      |      |      |      |      |      |      |      |      |      |      |      |      |      |      |      |      |
|------------|---|------|------|------|------|------|------|------|------|------|------|------|------|------|------|------|------|------|------|------|------|------|------|------|------|------|------|------|------|------|------|------|------|------|------|------|
|            |   | 5    | 0.28 | 0.40 | 0.45 | 0.46 | 0.46 | 0.48 | 0.48 | 0.47 | 0.46 | 0.43 | 0.42 | 0.40 | 0.37 | 0.36 | 0.35 | 0.33 | 0.30 | 0.29 | 0.27 | 0.26 | 0.24 | 0.22 | 0.21 | 0.22 | 0.21 | 0.20 | 0.19 | 0.18 | 0.17 | 0.17 | 0.18 | 0.16 | 0.15 | 0.10 |
|            |   | 6    | 0.28 | 0.40 | 0.46 | 0.48 | 0.49 | 0.49 | 0.49 | 0.48 | 0.47 | 0.43 | 0.41 | 0.40 | 0.38 | 0.34 | 0.33 | 0.30 | 0.28 | 0.27 | 0.26 | 0.25 | 0.24 | 0.23 | 0.21 | 0.20 | 0.19 | 0.17 | 0.17 | 0.17 | 0.18 | 0.19 | 0.19 | 0.20 | 0.18 | 0.12 |
| CMCC-CM    | 1 | 0.35 | 0.36 | 0.37 | 0.40 | 0.41 | 0.43 | 0.45 | 0.49 | 0.50 | 0.53 | 0.53 | 0.53 | 0.52 | 0.50 | 0.48 | 0.47 | 0.45 | 0.43 | 0.42 | 0.40 | 0.39 | 0.37 | 0.38 | 0.36 | 0.35 | 0.33 | 0.31 | 0.30 | 0.28 | 0.27 | 0.25 | 0.23 | 0.19 | 0.15 | 0.11 |
|            | 2 | 0.32 | 0.42 | 0.47 | 0.50 | 0.56 | 0.58 | 0.59 | 0.61 | 0.61 | 0.60 | 0.59 | 0.58 | 0.57 | 0.56 | 0.55 | 0.53 | 0.52 | 0.50 | 0.48 | 0.46 | 0.46 | 0.44 | 0.42 | 0.40 | 0.38 | 0.36 | 0.34 | 0.32 | 0.31 | 0.29 | 0.27 | 0.25 | 0.21 | 0.17 | 0.11 |
|            | 3 | 0.26 | 0.37 | 0.40 | 0.43 | 0.45 | 0.46 | 0.47 | 0.48 | 0.47 | 0.50 | 0.52 | 0.53 | 0.60 | 0.60 | 0.61 | 0.62 | 0.61 | 0.62 | 0.62 | 0.59 | 0.57 | 0.55 | 0.52 | 0.50 | 0.47 | 0.45 | 0.43 | 0.40 | 0.38 | 0.36 | 0.34 | 0.31 | 0.27 | 0.21 | 0.14 |
|            | 4 | 0.26 | 0.37 | 0.43 | 0.47 | 0.49 | 0.51 | 0.54 | 0.57 | 0.60 | 0.62 | 0.64 | 0.68 | 0.69 | 0.68 | 0.68 | 0.68 | 0.66 | 0.64 | 0.62 | 0.59 | 0.56 | 0.54 | 0.52 | 0.50 | 0.48 | 0.45 | 0.43 | 0.41 | 0.38 | 0.36 | 0.34 | 0.32 | 0.27 | 0.21 | 0.12 |
|            | 5 | 0.28 | 0.38 | 0.42 | 0.45 | 0.48 | 0.52 | 0.58 | 0.61 | 0.62 | 0.61 | 0.61 | 0.61 | 0.60 | 0.60 | 0.59 | 0.58 | 0.58 | 0.57 | 0.55 | 0.54 | 0.53 | 0.50 | 0.48 | 0.46 | 0.44 | 0.42 | 0.40 | 0.38 | 0.35 | 0.33 | 0.31 | 0.29 | 0.25 | 0.18 | 0.14 |
|            | 6 | 0.28 | 0.39 | 0.45 | 0.48 | 0.49 | 0.52 | 0.56 | 0.58 | 0.59 | 0.60 | 0.61 | 0.60 | 0.61 | 0.61 | 0.60 | 0.60 | 0.59 | 0.58 | 0.57 | 0.55 | 0.53 | 0.51 | 0.49 | 0.47 | 0.45 | 0.42 | 0.40 | 0.38 | 0.36 | 0.33 | 0.31 | 0.29 | 0.25 | 0.19 | 0.10 |
| CMCC-CM5   | 1 | 0.30 | 0.37 | 0.44 | 0.49 | 0.52 | 0.56 | 0.59 | 0.61 | 0.64 | 0.63 | 0.62 | 0.61 | 0.59 | 0.58 | 0.56 | 0.54 | 0.52 | 0.50 | 0.48 | 0.45 | 0.44 | 0.42 | 0.40 | 0.38 | 0.37 | 0.35 | 0.34 | 0.32 | 0.30 | 0.29 | 0.27 | 0.23 | 0.19 | 0.15 | 0.11 |
|            | 2 | 0.32 | 0.41 | 0.46 | 0.49 | 0.50 | 0.52 | 0.54 | 0.56 | 0.56 | 0.56 | 0.57 | 0.58 | 0.58 | 0.57 | 0.56 | 0.54 | 0.52 | 0.51 | 0.49 | 0.48 | 0.46 | 0.44 | 0.42 | 0.38 | 0.38 | 0.37 | 0.35 | 0.33 | 0.32 | 0.30 | 0.27 | 0.25 | 0.21 | 0.17 | 0.11 |
|            | 3 | 0.26 | 0.36 | 0.42 | 0.46 | 0.48 | 0.50 | 0.53 | 0.54 | 0.56 | 0.56 | 0.57 | 0.57 | 0.57 | 0.56 | 0.56 | 0.54 | 0.53 | 0.54 | 0.53 | 0.52 | 0.51 | 0.50 | 0.49 | 0.45 | 0.45 | 0.44 | 0.43 | 0.41 | 0.39 | 0.36 | 0.34 | 0.32 | 0.26 | 0.21 | 0.14 |
|            | 4 | 0.26 | 0.36 | 0.42 | 0.44 | 0.44 | 0.45 | 0.47 | 0.53 | 0.54 | 0.56 | 0.57 | 0.57 | 0.58 | 0.58 | 0.58 | 0.57 | 0.57 | 0.56 | 0.55 | 0.53 | 0.52 | 0.51 | 0.49 | 0.48 | 0.45 | 0.42 | 0.41 | 0.40 | 0.37 | 0.33 | 0.31 | 0.29 | 0.25 | 0.20 | 0.14 |
|            | 5 | 0.28 | 0.38 | 0.43 | 0.46 | 0.49 | 0.52 | 0.53 | 0.53 | 0.55 | 0.55 | 0.58 | 0.58 | 0.57 | 0.56 | 0.55 | 0.54 | 0.53 | 0.52 | 0.51 | 0.50 | 0.49 | 0.48 | 0.46 | 0.43 | 0.42 | 0.41 | 0.39 | 0.37 | 0.35 | 0.34 | 0.32 | 0.29 | 0.25 | 0.19 | 0.13 |
|            | 6 | 0.28 | 0.39 | 0.45 | 0.48 | 0.47 | 0.49 | 0.49 | 0.50 | 0.51 | 0.52 | 0.53 | 0.54 | 0.54 | 0.54 | 0.56 | 0.55 | 0.55 | 0.54 | 0.54 | 0.53 | 0.51 | 0.50 | 0.48 | 0.47 | 0.44 | 0.42 | 0.40 | 0.38 | 0.36 | 0.33 | 0.32 | 0.29 | 0.24 | 0.20 | 0.13 |
| CNRM-CM5   | 1 | 0.32 | 0.45 | 0.52 | 0.53 | 0.52 | 0.49 | 0.49 | 0.48 | 0.49 | 0.49 | 0.48 | 0.48 | 0.46 | 0.46 | 0.44 | 0.44 | 0.44 | 0.43 | 0.42 | 0.41 | 0.40 | 0.38 | 0.36 | 0.35 | 0.34 | 0.33 | 0.31 | 0.30 | 0.28 | 0.26 | 0.25 | 0.23 | 0.20 | 0.16 | 0.11 |
|            | 2 | 0.32 | 0.42 | 0.48 | 0.50 | 0.52 | 0.50 | 0.49 | 0.49 | 0.50 | 0.52 | 0.52 | 0.52 | 0.51 | 0.50 | 0.50 | 0.49 | 0.49 | 0.48 | 0.46 | 0.45 | 0.44 | 0.43 | 0.41 | 0.39 | 0.38 | 0.36 | 0.34 | 0.32 | 0.31 | 0.29 | 0.28 | 0.26 | 0.22 | 0.19 | 0.11 |
|            | 3 | 0.26 | 0.36 | 0.42 | 0.46 | 0.48 | 0.49 | 0.50 | 0.51 | 0.54 | 0.57 | 0.60 | 0.60 | 0.61 | 0.61 | 0.60 | 0.59 | 0.58 | 0.57 | 0.56 | 0.55 | 0.53 | 0.51 | 0.49 | 0.47 | 0.45 | 0.43 | 0.41 | 0.39 | 0.37 | 0.35 | 0.33 | 0.29 | 0.26 | 0.22 | 0.14 |
|            | 4 | 0.26 | 0.37 | 0.42 | 0.45 | 0.47 | 0.48 | 0.50 | 0.51 | 0.52 | 0.55 | 0.57 | 0.57 | 0.58 | 0.57 | 0.56 | 0.55 | 0.54 | 0.53 | 0.53 | 0.52 | 0.52 | 0.51 | 0.49 | 0.48 | 0.46 | 0.44 | 0.41 | 0.39 | 0.38 | 0.36 | 0.34 | 0.30 | 0.28 | 0.21 | 0.15 |
|            | 5 | 0.28 | 0.40 | 0.45 | 0.43 | 0.44 | 0.48 | 0.50 | 0.51 | 0.52 | 0.52 | 0.52 | 0.52 | 0.51 | 0.50 | 0.51 | 0.52 | 0.53 | 0.52 | 0.52 | 0.51 | 0.50 | 0.48 | 0.47 | 0.45 | 0.43 | 0.41 | 0.39 | 0.37 | 0.35 | 0.33 | 0.31 | 0.28 | 0.25 | 0.20 | 0.13 |
|            | 6 | 0.28 | 0.38 | 0.38 | 0.41 | 0.45 | 0.48 | 0.50 | 0.49 | 0.48 | 0.49 | 0.50 | 0.49 | 0.48 | 0.48 | 0.48 | 0.48 | 0.48 | 0.49 | 0.49 | 0.49 | 0.48 | 0.47 | 0.46 | 0.44 | 0.42 | 0.40 | 0.39 | 0.37 | 0.34 | 0.33 | 0.31 | 0.29 | 0.24 | 0.20 | 0.13 |
| GFDL-CM3   | 1 | 0.22 | 0.31 | 0.34 | 0.38 | 0.41 | 0.42 | 0.43 | 0.42 | 0.42 | 0.43 | 0.42 | 0.41 | 0.40 | 0.39 | 0.41 | 0.40 | 0.39 | 0.39 | 0.39 | 0.36 | 0.35 | 0.35 | 0.34 | 0.33 | 0.32 | 0.31 | 0.30 | 0.30 | 0.28 | 0.25 | 0.25 | 0.23 | 0.19 | 0.15 | 0.11 |
|            | 2 | 0.26 | 0.33 | 0.37 | 0.38 | 0.41 | 0.44 | 0.46 | 0.48 | 0.47 | 0.48 | 0.47 | 0.47 | 0.46 | 0.47 | 0.47 | 0.46 | 0.46 | 0.46 | 0.43 | 0.42 | 0.41 | 0.40 | 0.38 | 0.37 | 0.36 | 0.35 | 0.33 | 0.32 | 0.30 | 0.28 | 0.26 | 0.24 | 0.21 | 0.17 | 0.11 |
|            | 3 | 0.24 | 0.32 | 0.34 | 0.36 | 0.37 | 0.37 | 0.40 | 0.43 | 0.46 | 0.48 | 0.50 | 0.51 | 0.51 | 0.51 | 0.52 | 0.51 | 0.50 | 0.49 | 0.49 | 0.48 | 0.48 | 0.47 | 0.46 | 0.42 | 0.40 | 0.39 | 0.37 | 0.36 | 0.33 | 0.30 | 0.29 | 0.27 | 0.24 | 0.20 | 0.14 |
|            | 4 | 0.25 | 0.34 | 0.36 | 0.40 | 0.41 | 0.43 | 0.44 | 0.47 | 0.50 | 0.53 | 0.55 | 0.55 | 0.55 | 0.54 | 0.53 | 0.53 | 0.52 | 0.51 | 0.50 | 0.49 | 0.48 | 0.47 | 0.46 | 0.44 | 0.43 | 0.42 | 0.39 | 0.34 | 0.32 | 0.30 | 0.26 | 0.26 | 0.22 | 0.17 | 0.11 |
|            | 5 | 0.27 | 0.34 | 0.37 | 0.40 | 0.40 | 0.41 | 0.43 | 0.45 | 0.47 | 0.48 | 0.48 | 0.49 | 0.49 | 0.47 | 0.46 | 0.46 | 0.45 | 0.44 | 0.44 | 0.43 | 0.43 | 0.39 | 0.39 | 0.38 | 0.38 | 0.37 | 0.35 | 0.34 | 0.32 | 0.31 | 0.29 | 0.27 | 0.23 | 0.18 | 0.13 |
|            | 6 | 0.27 | 0.36 | 0.38 | 0.39 | 0.40 | 0.42 | 0.43 | 0.47 | 0.49 | 0.50 | 0.52 | 0.52 | 0.51 | 0.51 | 0.50 | 0.49 | 0.48 | 0.47 | 0.45 | 0.45 | 0.44 | 0.44 | 0.43 | 0.42 | 0.40 | 0.40 | 0.39 | 0.35 | 0.33 | 0.31 | 0.29 | 0.27 | 0.23 | 0.18 | 0.12 |
| GFDL-ESM2G | 1 | 0.35 | 0.48 | 0.45 | 0.41 | 0.41 | 0.43 | 0.45 | 0.47 | 0.48 | 0.49 | 0.49 | 0.50 | 0.50 | 0.49 | 0.49 | 0.48 | 0.47 | 0.46 | 0.45 | 0.43 | 0.42 | 0.40 | 0.39 | 0.37 | 0.35 | 0.34 | 0.30 | 0.30 | 0.28 | 0.27 | 0.25 | 0.23 | 0.19 | 0.15 | 0.11 |
|            | 2 | 0.32 | 0.45 | 0.50 | 0.50 | 0.49 | 0.49 | 0.52 | 0.51 | 0.51 | 0.52 | 0.50 | 0.50 | 0.50 | 0.50 | 0.50 | 0.49 | 0.48 | 0.48 | 0.46 | 0.46 | 0.44 | 0.43 | 0.42 | 0.38 | 0.38 | 0.36 | 0.34 | 0.33 | 0.31 | 0.29 | 0.27 | 0.25 | 0.21 | 0.17 | 0.12 |
|            | 3 | 0.26 | 0.37 | 0.44 | 0.45 | 0.46 | 0.48 | 0.50 | 0.51 | 0.51 | 0.52 | 0.53 | 0.54 | 0.55 | 0.55 | 0.55 | 0.54 | 0.53 | 0.53 | 0.52 | 0.50 | 0.49 | 0.47 | 0.46 | 0.44 | 0.41 | 0.40 | 0.39 | 0.38 | 0.37 | 0.35 | 0.33 | 0.31 | 0.26 | 0.21 | 0.14 |
|            | 4 | 0.26 | 0.37 | 0.39 | 0.41 | 0.42 | 0.43 | 0.44 | 0.45 | 0.47 | 0.49 | 0.49 | 0.48 | 0.47 | 0.47 | 0.46 | 0.46 | 0.46 | 0.45 | 0.43 | 0.43 | 0.42 | 0.41 | 0.41 | 0.37 | 0.37 | 0.36 | 0.36 | 0.34 | 0.33 | 0.32 | 0.30 | 0.28 | 0.25 | 0.21 | 0.14 |
|            | 5 | 0.28 | 0.40 | 0.43 | 0.43 | 0.43 | 0.44 | 0.44 | 0.46 | 0.46 | 0.45 | 0.45 | 0.46 | 0.45 | 0.46 | 0.46 | 0.46 | 0.46 | 0.45 | 0.44 | 0.44 | 0.44 | 0.43 | 0.42 | 0.41 | 0.40 | 0.39 | 0.35 | 0.35 | 0.33 | 0.31 | 0.29 | 0.27 | 0.23 | 0.19 | 0.13 |

|              | 6 | 0.28 | 0.40 | 0.44 | 0.45 | 0.48 | 0.50 | 0.51 | 0.50 | 0.50 | 0.50 | 0.52 | 0.53 | 0.53 | 0.53 | 0.52 | 0.51 | 0.49 | 0.49 | 0.48 | 0.46 | 0.45 | 0.43 | 0.41 | 0.39 | 0.37 | 0.35 | 0.31 | 0.30 | 0.29 | 0.27 | 0.26 | 0.24 | 0.20 | 0.15 | 0.11 |      |
|--------------|---|------|------|------|------|------|------|------|------|------|------|------|------|------|------|------|------|------|------|------|------|------|------|------|------|------|------|------|------|------|------|------|------|------|------|------|------|
| GFDL-ESM2M   | 1 | 0.35 | 0.49 | 0.55 | 0.54 | 0.54 | 0.51 | 0.48 | 0.47 | 0.46 | 0.44 | 0.44 | 0.42 | 0.41 | 0.40 | 0.38 | 0.37 | 0.36 | 0.36 | 0.36 | 0.35 | 0.37 | 0.37 | 0.36 | 0.35 | 0.33 | 0.32 | 0.31 | 0.30 | 0.28 | 0.27 | 0.25 | 0.24 | 0.19 | 0.15 | 0.11 |      |
|              | 2 | 0.32 | 0.45 | 0.53 | 0.56 | 0.57 | 0.56 | 0.58 | 0.57 | 0.57 | 0.55 | 0.53 | 0.51 | 0.49 | 0.48 | 0.46 | 0.44 | 0.47 | 0.45 | 0.43 | 0.43 | 0.42 | 0.41 | 0.39 | 0.38 | 0.37 | 0.36 | 0.34 | 0.32 | 0.30 | 0.29 | 0.27 | 0.25 | 0.21 | 0.17 | 0.11 |      |
|              | 3 | 0.26 | 0.37 | 0.45 | 0.52 | 0.53 | 0.53 | 0.53 | 0.50 | 0.50 | 0.49 | 0.49 | 0.47 | 0.46 | 0.48 | 0.48 | 0.46 | 0.45 | 0.43 | 0.42 | 0.40 | 0.38 | 0.37 | 0.36 | 0.36 | 0.34 | 0.34 | 0.34 | 0.34 | 0.33 | 0.32 | 0.31 | 0.30 | 0.24 | 0.21 | 0.14 |      |
|              | 4 | 0.26 | 0.37 | 0.45 | 0.51 | 0.52 | 0.54 | 0.54 | 0.55 | 0.56 | 0.57 | 0.55 | 0.53 | 0.51 | 0.49 | 0.47 | 0.46 | 0.45 | 0.44 | 0.43 | 0.44 | 0.43 | 0.43 | 0.42 | 0.42 | 0.40 | 0.39 | 0.39 | 0.37 | 0.35 | 0.34 | 0.32 | 0.30 | 0.24 | 0.21 | 0.14 |      |
|              | 5 | 0.28 | 0.40 | 0.49 | 0.55 | 0.58 | 0.61 | 0.60 | 0.58 | 0.57 | 0.54 | 0.51 | 0.49 | 0.46 | 0.44 | 0.42 | 0.41 | 0.41 | 0.40 | 0.39 | 0.39 | 0.38 | 0.33 | 0.32 | 0.31 | 0.31 | 0.32 | 0.31 | 0.30 | 0.29 | 0.28 | 0.26 | 0.25 | 0.22 | 0.16 | 0.11 |      |
|              | 6 | 0.28 | 0.39 | 0.48 | 0.54 | 0.59 | 0.62 | 0.62 | 0.61 | 0.59 | 0.57 | 0.55 | 0.53 | 0.50 | 0.48 | 0.46 | 0.46 | 0.44 | 0.43 | 0.41 | 0.40 | 0.39 | 0.38 | 0.37 | 0.32 | 0.30 | 0.28 | 0.29 | 0.29 | 0.30 | 0.31 | 0.28 | 0.26 | 0.22 | 0.18 | 0.13 |      |
| HadGEM2-AO   | 1 | 0.28 | 0.26 | 0.26 | 0.31 | 0.31 | 0.30 | 0.30 | 0.31 | 0.32 | 0.32 | 0.31 | 0.32 | 0.30 | 0.30 | 0.30 | 0.30 | 0.30 | 0.29 | 0.28 | 0.28 | 0.27 | 0.26 | 0.26 | 0.25 | 0.25 | 0.24 | 0.22 | 0.21 | 0.20 | 0.19 | 0.18 | 0.17 | 0.15 | 0.13 | 0.09 |      |
|              | 2 | 0.29 | 0.34 | 0.38 | 0.39 | 0.38 | 0.37 | 0.35 | 0.34 | 0.33 | 0.32 | 0.31 | 0.30 | 0.26 | 0.25 | 0.24 | 0.23 | 0.22 | 0.21 | 0.22 | 0.21 | 0.20 | 0.20 | 0.20 | 0.20 | 0.20 | 0.21 | 0.20 | 0.19 | 0.18 | 0.18 | 0.18 | 0.18 | 0.15 | 0.12 | 0.09 |      |
|              | 3 | 0.25 | 0.29 | 0.33 | 0.37 | 0.40 | 0.42 | 0.43 | 0.43 | 0.43 | 0.43 | 0.41 | 0.40 | 0.38 | 0.38 | 0.37 | 0.36 | 0.36 | 0.32 | 0.32 | 0.31 | 0.31 | 0.31 | 0.30 | 0.31 | 0.31 | 0.30 | 0.29 | 0.29 | 0.28 | 0.24 | 0.23 | 0.22 | 0.22 | 0.18 | 0.13 | 0.09 |
|              | 4 | 0.26 | 0.30 | 0.34 | 0.35 | 0.37 | 0.38 | 0.38 | 0.39 | 0.38 | 0.38 | 0.37 | 0.36 | 0.32 | 0.32 | 0.32 | 0.31 | 0.30 | 0.31 | 0.30 | 0.30 | 0.29 | 0.28 | 0.27 | 0.27 | 0.27 | 0.26 | 0.25 | 0.25 | 0.24 | 0.23 | 0.19 | 0.18 | 0.16 | 0.11 | 0.09 |      |
|              | 5 | 0.21 | 0.28 | 0.32 | 0.34 | 0.36 | 0.37 | 0.38 | 0.40 | 0.41 | 0.42 | 0.42 | 0.42 | 0.43 | 0.42 | 0.41 | 0.41 | 0.40 | 0.36 | 0.35 | 0.35 | 0.35 | 0.34 | 0.33 | 0.32 | 0.32 | 0.31 | 0.30 | 0.29 | 0.28 | 0.27 | 0.26 | 0.24 | 0.21 | 0.17 | 0.12 |      |
|              | 6 | 0.28 | 0.39 | 0.44 | 0.49 | 0.52 | 0.54 | 0.52 | 0.52 | 0.52 | 0.51 | 0.52 | 0.51 | 0.50 | 0.50 | 0.50 | 0.50 | 0.50 | 0.49 | 0.48 | 0.47 | 0.45 | 0.44 | 0.42 | 0.38 | 0.38 | 0.35 | 0.34 | 0.32 | 0.30 | 0.29 | 0.27 | 0.26 | 0.22 | 0.18 | 0.13 |      |
| HadGEM2-CC   | 1 | 0.30 | 0.38 | 0.45 | 0.48 | 0.52 | 0.56 | 0.61 | 0.62 | 0.63 | 0.63 | 0.61 | 0.60 | 0.58 | 0.56 | 0.56 | 0.53 | 0.51 | 0.49 | 0.47 | 0.45 | 0.44 | 0.42 | 0.40 | 0.38 | 0.36 | 0.34 | 0.32 | 0.30 | 0.28 | 0.27 | 0.25 | 0.23 | 0.18 | 0.15 | 0.11 |      |
|              | 2 | 0.31 | 0.43 | 0.49 | 0.53 | 0.55 | 0.56 | 0.56 | 0.58 | 0.59 | 0.60 | 0.59 | 0.59 | 0.58 | 0.59 | 0.57 | 0.56 | 0.54 | 0.52 | 0.51 | 0.49 | 0.47 | 0.45 | 0.43 | 0.41 | 0.39 | 0.37 | 0.35 | 0.33 | 0.31 | 0.29 | 0.27 | 0.25 | 0.21 | 0.17 | 0.11 |      |
|              | 3 | 0.26 | 0.37 | 0.45 | 0.49 | 0.51 | 0.53 | 0.56 | 0.56 | 0.58 | 0.60 | 0.61 | 0.64 | 0.64 | 0.65 | 0.65 | 0.65 | 0.64 | 0.63 | 0.61 | 0.60 | 0.57 | 0.55 | 0.53 | 0.50 | 0.48 | 0.45 | 0.43 | 0.40 | 0.38 | 0.36 | 0.33 | 0.29 | 0.26 | 0.21 | 0.14 |      |
|              | 4 | 0.26 | 0.37 | 0.43 | 0.48 | 0.51 | 0.54 | 0.56 | 0.58 | 0.59 | 0.60 | 0.62 | 0.63 | 0.65 | 0.65 | 0.64 | 0.64 | 0.64 | 0.63 | 0.62 | 0.60 | 0.58 | 0.55 | 0.53 | 0.51 | 0.48 | 0.45 | 0.43 | 0.40 | 0.38 | 0.34 | 0.33 | 0.31 | 0.26 | 0.21 | 0.14 |      |
|              | 5 | 0.28 | 0.40 | 0.45 | 0.49 | 0.52 | 0.54 | 0.55 | 0.56 | 0.57 | 0.57 | 0.57 | 0.58 | 0.60 | 0.60 | 0.61 | 0.61 | 0.61 | 0.60 | 0.58 | 0.56 | 0.53 | 0.51 | 0.49 | 0.46 | 0.44 | 0.41 | 0.40 | 0.37 | 0.35 | 0.33 | 0.31 | 0.29 | 0.24 | 0.19 | 0.13 |      |
|              | 6 | 0.28 | 0.40 | 0.47 | 0.51 | 0.55 | 0.56 | 0.59 | 0.59 | 0.59 | 0.60 | 0.60 | 0.61 | 0.63 | 0.62 | 0.62 | 0.61 | 0.60 | 0.59 | 0.57 | 0.55 | 0.53 | 0.51 | 0.49 | 0.47 | 0.45 | 0.41 | 0.40 | 0.38 | 0.36 | 0.34 | 0.31 | 0.29 | 0.24 | 0.19 | 0.13 |      |
| IPSL-CM5A-MR | 1 | 0.33 | 0.36 | 0.38 | 0.41 | 0.42 | 0.43 | 0.43 | 0.43 | 0.43 | 0.44 | 0.46 | 0.47 | 0.46 | 0.47 | 0.46 | 0.45 | 0.44 | 0.44 | 0.42 | 0.41 | 0.40 | 0.39 | 0.38 | 0.36 | 0.34 | 0.33 | 0.31 | 0.29 | 0.27 | 0.26 | 0.24 | 0.23 | 0.19 | 0.15 | 0.11 |      |
|              | 2 | 0.32 | 0.38 | 0.43 | 0.45 | 0.47 | 0.47 | 0.46 | 0.46 | 0.48 | 0.49 | 0.50 | 0.49 | 0.48 | 0.49 | 0.49 | 0.48 | 0.47 | 0.46 | 0.45 | 0.44 | 0.43 | 0.42 | 0.40 | 0.39 | 0.37 | 0.36 | 0.35 | 0.30 | 0.30 | 0.28 | 0.26 | 0.25 | 0.21 | 0.17 | 0.11 |      |
|              | 3 | 0.26 | 0.34 | 0.38 | 0.42 | 0.44 | 0.45 | 0.48 | 0.50 | 0.52 | 0.53 | 0.54 | 0.55 | 0.55 | 0.54 | 0.55 | 0.55 | 0.54 | 0.54 | 0.53 | 0.52 | 0.51 | 0.50 | 0.48 | 0.47 | 0.44 | 0.42 | 0.41 | 0.39 | 0.37 | 0.34 | 0.32 | 0.30 | 0.26 | 0.21 | 0.14 |      |
|              | 4 | 0.26 | 0.36 | 0.38 | 0.40 | 0.42 | 0.44 | 0.45 | 0.46 | 0.48 | 0.52 | 0.52 | 0.52 | 0.53 | 0.53 | 0.54 | 0.55 | 0.54 | 0.53 | 0.53 | 0.52 | 0.51 | 0.50 | 0.48 | 0.47 | 0.45 | 0.43 | 0.41 | 0.39 | 0.36 | 0.35 | 0.33 | 0.30 | 0.26 | 0.21 | 0.14 |      |
|              | 5 | 0.28 | 0.38 | 0.42 | 0.44 | 0.45 | 0.46 | 0.50 | 0.52 | 0.54 | 0.55 | 0.55 | 0.55 | 0.55 | 0.54 | 0.54 | 0.53 | 0.52 | 0.50 | 0.48 | 0.46 | 0.44 | 0.43 | 0.42 | 0.41 | 0.39 | 0.37 | 0.36 | 0.34 | 0.32 | 0.30 | 0.28 | 0.27 | 0.23 | 0.19 | 0.13 |      |
|              | 6 | 0.28 | 0.40 | 0.43 | 0.43 | 0.45 | 0.48 | 0.50 | 0.52 | 0.52 | 0.53 | 0.54 | 0.54 | 0.53 | 0.54 | 0.53 | 0.53 | 0.51 | 0.49 | 0.48 | 0.46 | 0.46 | 0.45 | 0.45 | 0.43 | 0.41 | 0.39 | 0.38 | 0.36 | 0.34 | 0.32 | 0.30 | 0.28 | 0.23 | 0.19 | 0.13 |      |
| MIROC5       | 1 | 0.23 | 0.26 | 0.27 | 0.30 | 0.33 | 0.35 | 0.34 | 0.36 | 0.39 | 0.36 | 0.37 | 0.38 | 0.38 | 0.38 | 0.39 | 0.39 | 0.39 | 0.39 | 0.39 | 0.39 | 0.38 | 0.37 | 0.36 | 0.35 | 0.34 | 0.32 | 0.31 | 0.29 | 0.27 | 0.26 | 0.24 | 0.23 | 0.19 | 0.15 | 0.08 |      |
|              | 2 | 0.28 | 0.34 | 0.39 | 0.41 | 0.45 | 0.48 | 0.52 | 0.54 | 0.55 | 0.53 | 0.52 | 0.52 | 0.52 | 0.52 | 0.46 | 0.46 | 0.46 | 0.45 | 0.45 | 0.43 | 0.43 | 0.42 | 0.40 | 0.39 | 0.37 | 0.36 | 0.34 | 0.32 | 0.30 | 0.29 | 0.27 | 0.25 | 0.21 | 0.17 | 0.10 |      |
|              | 3 | 0.23 | 0.32 | 0.37 | 0.42 | 0.45 | 0.46 | 0.50 | 0.51 | 0.53 | 0.53 | 0.54 | 0.53 | 0.52 | 0.52 | 0.51 | 0.51 | 0.46 | 0.46 | 0.45 | 0.45 | 0.45 | 0.44 | 0.42 | 0.41 | 0.40 | 0.39 | 0.37 | 0.35 | 0.33 | 0.32 | 0.30 | 0.28 | 0.24 | 0.20 | 0.14 |      |
|              | 4 | 0.26 | 0.34 | 0.40 | 0.46 | 0.50 | 0.52 | 0.54 | 0.54 | 0.52 | 0.54 | 0.54 | 0.54 | 0.53 | 0.48 | 0.48 | 0.47 | 0.46 | 0.45 | 0.45 | 0.44 | 0.44 | 0.43 | 0.42 | 0.42 | 0.41 | 0.40 | 0.39 | 0.38 | 0.36 | 0.34 | 0.33 | 0.30 | 0.26 | 0.21 | 0.13 |      |

|            |   |      |      |      |      |      |      |      |      |      |      |      |      |      |      |      |      |      |      |      |      |      |      |      |      |      |      |      |      |      |      |      |      |      |      |      |
|------------|---|------|------|------|------|------|------|------|------|------|------|------|------|------|------|------|------|------|------|------|------|------|------|------|------|------|------|------|------|------|------|------|------|------|------|------|
|            | 5 | 0.28 | 0.37 | 0.43 | 0.47 | 0.50 | 0.51 | 0.52 | 0.53 | 0.52 | 0.52 | 0.51 | 0.51 | 0.50 | 0.50 | 0.50 | 0.45 | 0.44 | 0.43 | 0.42 | 0.41 | 0.40 | 0.40 | 0.39 | 0.38 | 0.37 | 0.36 | 0.35 | 0.33 | 0.32 | 0.30 | 0.28 | 0.26 | 0.22 | 0.19 | 0.12 |
|            | 6 | 0.28 | 0.37 | 0.43 | 0.48 | 0.52 | 0.54 | 0.53 | 0.53 | 0.53 | 0.48 | 0.48 | 0.45 | 0.44 | 0.44 | 0.44 | 0.44 | 0.44 | 0.44 | 0.44 | 0.43 | 0.43 | 0.43 | 0.41 | 0.41 | 0.39 | 0.37 | 0.36 | 0.34 | 0.32 | 0.30 | 0.28 | 0.27 | 0.23 | 0.18 | 0.13 |
| MPI-ESM-LR | 1 | 0.35 | 0.49 | 0.56 | 0.57 | 0.57 | 0.56 | 0.57 | 0.57 | 0.57 | 0.59 | 0.58 | 0.57 | 0.55 | 0.54 | 0.52 | 0.51 | 0.49 | 0.47 | 0.45 | 0.44 | 0.43 | 0.41 | 0.40 | 0.38 | 0.36 | 0.34 | 0.32 | 0.30 | 0.28 | 0.27 | 0.25 | 0.23 | 0.19 | 0.16 | 0.11 |
|            | 2 | 0.32 | 0.46 | 0.54 | 0.59 | 0.60 | 0.59 | 0.58 | 0.62 | 0.63 | 0.62 | 0.62 | 0.60 | 0.59 | 0.57 | 0.55 | 0.54 | 0.52 | 0.51 | 0.49 | 0.48 | 0.46 | 0.44 | 0.43 | 0.41 | 0.39 | 0.37 | 0.35 | 0.33 | 0.31 | 0.29 | 0.27 | 0.24 | 0.21 | 0.17 | 0.12 |
|            | 3 | 0.26 | 0.37 | 0.43 | 0.47 | 0.48 | 0.49 | 0.51 | 0.55 | 0.57 | 0.58 | 0.59 | 0.59 | 0.60 | 0.60 | 0.60 | 0.59 | 0.59 | 0.59 | 0.57 | 0.56 | 0.54 | 0.54 | 0.52 | 0.49 | 0.47 | 0.45 | 0.43 | 0.41 | 0.38 | 0.36 | 0.32 | 0.32 | 0.27 | 0.21 | 0.14 |
|            | 4 | 0.26 | 0.36 | 0.42 | 0.45 | 0.46 | 0.50 | 0.54 | 0.56 | 0.57 | 0.59 | 0.60 | 0.59 | 0.58 | 0.57 | 0.56 | 0.54 | 0.54 | 0.53 | 0.53 | 0.51 | 0.50 | 0.49 | 0.48 | 0.46 | 0.45 | 0.43 | 0.41 | 0.38 | 0.37 | 0.35 | 0.34 | 0.33 | 0.26 | 0.22 | 0.14 |
|            | 5 | 0.28 | 0.38 | 0.45 | 0.49 | 0.49 | 0.50 | 0.50 | 0.52 | 0.52 | 0.53 | 0.55 | 0.56 | 0.57 | 0.57 | 0.57 | 0.56 | 0.55 | 0.55 | 0.54 | 0.53 | 0.51 | 0.49 | 0.48 | 0.46 | 0.43 | 0.42 | 0.40 | 0.37 | 0.36 | 0.33 | 0.32 | 0.30 | 0.26 | 0.22 | 0.13 |
|            | 6 | 0.28 | 0.38 | 0.45 | 0.48 | 0.51 | 0.53 | 0.55 | 0.58 | 0.58 | 0.59 | 0.61 | 0.62 | 0.63 | 0.63 | 0.63 | 0.61 | 0.59 | 0.58 | 0.56 | 0.54 | 0.52 | 0.50 | 0.48 | 0.46 | 0.44 | 0.42 | 0.40 | 0.38 | 0.36 | 0.34 | 0.33 | 0.29 | 0.25 | 0.19 | 0.13 |
| MPI-ESM-MR | 1 | 0.35 | 0.44 | 0.46 | 0.49 | 0.45 | 0.45 | 0.46 | 0.49 | 0.50 | 0.52 | 0.52 | 0.51 | 0.52 | 0.51 | 0.50 | 0.49 | 0.47 | 0.46 | 0.44 | 0.42 | 0.41 | 0.39 | 0.37 | 0.36 | 0.32 | 0.32 | 0.31 | 0.29 | 0.28 | 0.26 | 0.25 | 0.23 | 0.19 | 0.15 | 0.11 |
|            | 2 | 0.32 | 0.42 | 0.46 | 0.49 | 0.49 | 0.51 | 0.53 | 0.53 | 0.53 | 0.54 | 0.53 | 0.54 | 0.54 | 0.53 | 0.53 | 0.52 | 0.50 | 0.49 | 0.48 | 0.46 | 0.44 | 0.42 | 0.40 | 0.39 | 0.37 | 0.35 | 0.34 | 0.33 | 0.32 | 0.28 | 0.25 | 0.25 | 0.21 | 0.17 | 0.11 |
|            | 3 | 0.26 | 0.36 | 0.41 | 0.45 | 0.49 | 0.50 | 0.50 | 0.51 | 0.52 | 0.51 | 0.51 | 0.52 | 0.52 | 0.52 | 0.53 | 0.54 | 0.55 | 0.54 | 0.52 | 0.51 | 0.50 | 0.49 | 0.47 | 0.46 | 0.44 | 0.41 | 0.40 | 0.38 | 0.37 | 0.35 | 0.33 | 0.30 | 0.26 | 0.21 | 0.14 |
|            | 4 | 0.26 | 0.36 | 0.39 | 0.41 | 0.43 | 0.44 | 0.44 | 0.45 | 0.46 | 0.47 | 0.49 | 0.51 | 0.52 | 0.53 | 0.52 | 0.53 | 0.53 | 0.53 | 0.53 | 0.52 | 0.51 | 0.49 | 0.47 | 0.46 | 0.44 | 0.42 | 0.40 | 0.38 | 0.36 | 0.34 | 0.32 | 0.28 | 0.25 | 0.20 | 0.14 |
|            | 5 | 0.28 | 0.39 | 0.42 | 0.45 | 0.48 | 0.51 | 0.53 | 0.53 | 0.54 | 0.56 | 0.56 | 0.56 | 0.56 | 0.55 | 0.55 | 0.55 | 0.55 | 0.55 | 0.53 | 0.52 | 0.50 | 0.49 | 0.46 | 0.45 | 0.43 | 0.41 | 0.39 | 0.37 | 0.35 | 0.32 | 0.31 | 0.29 | 0.24 | 0.19 | 0.13 |
|            | 6 | 0.28 | 0.36 | 0.35 | 0.36 | 0.36 | 0.36 | 0.39 | 0.42 | 0.47 | 0.48 | 0.50 | 0.51 | 0.51 | 0.52 | 0.51 | 0.51 | 0.50 | 0.49 | 0.49 | 0.48 | 0.47 | 0.47 | 0.45 | 0.45 | 0.41 | 0.40 | 0.39 | 0.37 | 0.36 | 0.33 | 0.31 | 0.29 | 0.24 | 0.19 | 0.13 |
| MPI-ESM-P  | 1 | 0.35 | 0.47 | 0.55 | 0.56 | 0.56 | 0.55 | 0.55 | 0.54 | 0.54 | 0.53 | 0.53 | 0.52 | 0.51 | 0.50 | 0.49 | 0.48 | 0.46 | 0.44 | 0.43 | 0.42 | 0.40 | 0.39 | 0.38 | 0.36 | 0.35 | 0.33 | 0.31 | 0.30 | 0.28 | 0.25 | 0.24 | 0.23 | 0.20 | 0.16 | 0.11 |
|            | 2 | 0.32 | 0.42 | 0.48 | 0.54 | 0.56 | 0.57 | 0.56 | 0.57 | 0.56 | 0.55 | 0.55 | 0.53 | 0.53 | 0.52 | 0.52 | 0.51 | 0.50 | 0.49 | 0.48 | 0.47 | 0.46 | 0.44 | 0.43 | 0.41 | 0.39 | 0.37 | 0.35 | 0.33 | 0.31 | 0.29 | 0.27 | 0.25 | 0.21 | 0.17 | 0.12 |
|            | 3 | 0.26 | 0.34 | 0.40 | 0.45 | 0.49 | 0.51 | 0.52 | 0.53 | 0.54 | 0.55 | 0.58 | 0.59 | 0.59 | 0.60 | 0.60 | 0.60 | 0.61 | 0.60 | 0.58 | 0.58 | 0.56 | 0.54 | 0.52 | 0.50 | 0.47 | 0.45 | 0.43 | 0.40 | 0.38 | 0.35 | 0.33 | 0.30 | 0.26 | 0.21 | 0.15 |
|            | 4 | 0.26 | 0.35 | 0.42 | 0.43 | 0.42 | 0.42 | 0.44 | 0.45 | 0.47 | 0.48 | 0.49 | 0.51 | 0.51 | 0.52 | 0.54 | 0.55 | 0.55 | 0.54 | 0.54 | 0.53 | 0.50 | 0.49 | 0.47 | 0.46 | 0.44 | 0.42 | 0.40 | 0.38 | 0.35 | 0.33 | 0.31 | 0.28 | 0.24 | 0.18 | 0.12 |
|            | 5 | 0.28 | 0.38 | 0.43 | 0.43 | 0.42 | 0.43 | 0.45 | 0.48 | 0.52 | 0.53 | 0.55 | 0.56 | 0.55 | 0.53 | 0.53 | 0.53 | 0.53 | 0.53 | 0.52 | 0.50 | 0.48 | 0.47 | 0.45 | 0.44 | 0.42 | 0.40 | 0.39 | 0.37 | 0.35 | 0.33 | 0.31 | 0.29 | 0.22 | 0.19 | 0.13 |
|            | 6 | 0.28 | 0.38 | 0.41 | 0.42 | 0.39 | 0.40 | 0.43 | 0.46 | 0.49 | 0.51 | 0.51 | 0.51 | 0.53 | 0.53 | 0.53 | 0.53 | 0.53 | 0.52 | 0.51 | 0.50 | 0.48 | 0.47 | 0.46 | 0.43 | 0.42 | 0.40 | 0.38 | 0.36 | 0.34 | 0.32 | 0.30 | 0.26 | 0.23 | 0.18 | 0.13 |
| MRI-CGCM3  | 1 | 0.13 | 0.19 | 0.24 | 0.26 | 0.27 | 0.29 | 0.31 | 0.34 | 0.35 | 0.36 | 0.38 | 0.40 | 0.40 | 0.40 | 0.40 | 0.40 | 0.39 | 0.38 | 0.37 | 0.36 | 0.34 | 0.33 | 0.33 | 0.30 | 0.30 | 0.29 | 0.28 | 0.27 | 0.26 | 0.25 | 0.24 | 0.22 | 0.19 | 0.15 | 0.11 |
|            | 2 | 0.23 | 0.30 | 0.35 | 0.37 | 0.38 | 0.38 | 0.39 | 0.41 | 0.42 | 0.43 | 0.45 | 0.46 | 0.46 | 0.46 | 0.47 | 0.46 | 0.45 | 0.44 | 0.42 | 0.42 | 0.41 | 0.40 | 0.38 | 0.36 | 0.32 | 0.32 | 0.30 | 0.29 | 0.27 | 0.25 | 0.24 | 0.23 | 0.20 | 0.16 | 0.11 |
|            | 3 | 0.20 | 0.27 | 0.33 | 0.37 | 0.39 | 0.41 | 0.42 | 0.42 | 0.42 | 0.42 | 0.43 | 0.43 | 0.43 | 0.43 | 0.42 | 0.42 | 0.43 | 0.41 | 0.41 | 0.40 | 0.37 | 0.36 | 0.34 | 0.33 | 0.31 | 0.29 | 0.27 | 0.24 | 0.22 | 0.22 | 0.20 | 0.19 | 0.20 | 0.18 | 0.13 |
|            | 4 | 0.23 | 0.30 | 0.34 | 0.35 | 0.39 | 0.41 | 0.42 | 0.43 | 0.44 | 0.44 | 0.45 | 0.47 | 0.47 | 0.46 | 0.46 | 0.45 | 0.43 | 0.42 | 0.41 | 0.39 | 0.38 | 0.37 | 0.36 | 0.32 | 0.33 | 0.31 | 0.30 | 0.29 | 0.28 | 0.27 | 0.26 | 0.24 | 0.21 | 0.19 | 0.13 |
|            | 5 | 0.24 | 0.30 | 0.35 | 0.38 | 0.38 | 0.39 | 0.39 | 0.40 | 0.39 | 0.38 | 0.37 | 0.37 | 0.37 | 0.36 | 0.35 | 0.35 | 0.34 | 0.34 | 0.31 | 0.30 | 0.30 | 0.30 | 0.29 | 0.28 | 0.28 | 0.28 | 0.26 | 0.26 | 0.25 | 0.25 | 0.24 | 0.23 | 0.21 | 0.18 | 0.13 |
|            | 6 | 0.26 | 0.33 | 0.39 | 0.41 | 0.40 | 0.41 | 0.41 | 0.40 | 0.41 | 0.40 | 0.40 | 0.40 | 0.40 | 0.38 | 0.37 | 0.33 | 0.33 | 0.33 | 0.32 | 0.31 | 0.31 | 0.30 | 0.28 | 0.29 | 0.27 | 0.26 | 0.25 | 0.25 | 0.24 | 0.23 | 0.23 | 0.23 | 0.22 | 0.19 | 0.13 |
| MRI-ESM1   | 1 | 0.18 | 0.25 | 0.27 | 0.26 | 0.28 | 0.29 | 0.31 | 0.33 | 0.34 | 0.35 | 0.36 | 0.37 | 0.38 | 0.38 | 0.38 | 0.37 | 0.36 | 0.35 | 0.34 | 0.34 | 0.33 | 0.32 | 0.31 | 0.28 | 0.28 | 0.27 | 0.27 | 0.26 | 0.24 | 0.22 | 0.21 | 0.20 | 0.18 | 0.15 | 0.11 |
|            | 2 | 0.24 | 0.31 | 0.33 | 0.33 | 0.34 | 0.36 | 0.40 | 0.42 | 0.43 | 0.43 | 0.43 | 0.43 | 0.42 | 0.43 | 0.42 | 0.41 | 0.40 | 0.40 | 0.39 | 0.38 | 0.37 | 0.36 | 0.35 | 0.34 | 0.34 | 0.34 | 0.31 | 0.31 | 0.29 | 0.28 | 0.26 | 0.25 | 0.21 | 0.17 | 0.11 |
|            | 3 | 0.19 | 0.25 | 0.28 | 0.32 | 0.34 | 0.33 | 0.33 | 0.34 | 0.36 | 0.37 | 0.37 | 0.38 | 0.39 | 0.39 | 0.41 | 0.41 | 0.41 | 0.40 | 0.40 | 0.39 | 0.38 | 0.34 | 0.34 | 0.33 | 0.32 | 0.31 | 0.31 | 0.30 | 0.29 | 0.29 | 0.28 | 0.27 | 0.23 | 0.19 | 0.14 |
|            | 4 | 0.25 | 0.30 | 0.33 | 0.35 | 0.38 | 0.40 | 0.41 | 0.43 | 0.43 | 0.44 | 0.44 | 0.44 | 0.43 | 0.43 | 0.43 | 0.42 | 0.36 | 0.36 | 0.34 | 0.34 | 0.34 | 0.33 | 0.33 | 0.32 | 0.31 | 0.30 | 0.29 | 0.28 | 0.27 | 0.26 | 0.26 | 0.24 | 0.21 | 0.18 | 0.13 |
|            | 5 | 0.24 | 0.31 | 0.34 | 0.34 | 0.36 | 0.35 | 0.35 | 0.36 | 0.36 | 0.38 | 0.38 | 0.38 | 0.38 | 0.38 | 0.38 | 0.38 | 0.38 | 0.38 | 0.37 | 0.37 | 0.35 | 0.34 | 0.33 | 0.29 | 0.29 | 0.28 | 0.28 | 0.27 | 0.27 | 0.26 | 0.24 | 0.23 | 0.22 | 0.20 | 0.19 |

|           |   |      |      |      |      |      |      |      |      |      |      |      |      |      |      |      |      |      |      |      |      |      |      |      |      |      |      |      |      |      |      |      |      |      |      |      |      |
|-----------|---|------|------|------|------|------|------|------|------|------|------|------|------|------|------|------|------|------|------|------|------|------|------|------|------|------|------|------|------|------|------|------|------|------|------|------|------|
| NorESM1-M | 6 | 0.26 | 0.33 | 0.37 | 0.40 | 0.41 | 0.40 | 0.42 | 0.40 | 0.41 | 0.41 | 0.41 | 0.42 | 0.42 | 0.42 | 0.43 | 0.42 | 0.41 | 0.41 | 0.41 | 0.39 | 0.36 | 0.35 | 0.35 | 0.34 | 0.33 | 0.32 | 0.31 | 0.30 | 0.29 | 0.29 | 0.27 | 0.27 | 0.24 | 0.19 | 0.13 |      |
|           | 1 | 0.35 | 0.48 | 0.49 | 0.48 | 0.47 | 0.45 | 0.43 | 0.41 | 0.38 | 0.36 | 0.35 | 0.32 | 0.31 | 0.30 | 0.28 | 0.28 | 0.27 | 0.25 | 0.25 | 0.25 | 0.25 | 0.26 | 0.24 | 0.23 | 0.22 | 0.21 | 0.21 | 0.20 | 0.20 | 0.20 | 0.19 | 0.18 | 0.17 | 0.15 | 0.11 |      |
|           | 2 | 0.32 | 0.46 | 0.55 | 0.57 | 0.57 | 0.53 | 0.52 | 0.49 | 0.48 | 0.45 | 0.44 | 0.40 | 0.38 | 0.36 | 0.35 | 0.33 | 0.31 | 0.29 | 0.28 | 0.28 | 0.28 | 0.28 | 0.29 | 0.29 | 0.27 | 0.26 | 0.25 | 0.24 | 0.23 | 0.22 | 0.21 | 0.20 | 0.18 | 0.15 | 0.12 |      |
|           | 3 | 0.26 | 0.37 | 0.44 | 0.47 | 0.47 | 0.46 | 0.48 | 0.47 | 0.44 | 0.39 | 0.38 | 0.35 | 0.35 | 0.35 | 0.36 | 0.37 | 0.36 | 0.36 | 0.36 | 0.36 | 0.36 | 0.35 | 0.34 | 0.33 | 0.32 | 0.31 | 0.31 | 0.29 | 0.27 | 0.26 | 0.25 | 0.24 | 0.20 | 0.17 | 0.13 |      |
|           | 4 | 0.26 | 0.37 | 0.46 | 0.49 | 0.51 | 0.52 | 0.52 | 0.51 | 0.50 | 0.49 | 0.48 | 0.47 | 0.41 | 0.38 | 0.36 | 0.34 | 0.33 | 0.32 | 0.32 | 0.31 | 0.30 | 0.30 | 0.29 | 0.29 | 0.29 | 0.29 | 0.28 | 0.25 | 0.25 | 0.24 | 0.23 | 0.22 | 0.19 | 0.16 | 0.12 |      |
|           | 5 | 0.28 | 0.40 | 0.49 | 0.54 | 0.54 | 0.51 | 0.50 | 0.48 | 0.47 | 0.45 | 0.42 | 0.41 | 0.40 | 0.39 | 0.38 | 0.38 | 0.36 | 0.35 | 0.32 | 0.32 | 0.32 | 0.32 | 0.31 | 0.31 | 0.31 | 0.30 | 0.27 | 0.27 | 0.27 | 0.27 | 0.26 | 0.24 | 0.24 | 0.21 | 0.17 | 0.13 |
|           | 6 | 0.28 | 0.39 | 0.43 | 0.48 | 0.47 | 0.48 | 0.49 | 0.50 | 0.48 | 0.47 | 0.45 | 0.43 | 0.42 | 0.40 | 0.39 | 0.39 | 0.38 | 0.39 | 0.39 | 0.39 | 0.38 | 0.37 | 0.36 | 0.36 | 0.35 | 0.34 | 0.32 | 0.31 | 0.30 | 0.29 | 0.28 | 0.27 | 0.26 | 0.22 | 0.19 | 0.13 |

**Table S6.** Details of the action centers (AC). The ACs represent the clusters/teleconnections identified in the GCMs and the reanalyses. The columns *Latitude1*, *Longitude1* and *Latitude2*, *Longitude2* contain the geographical coordinates of the first/second poles of the ACs, which are the closest to the first/second poles of the ACs of the reference clusters. The first pole means the southerly (easterly) located pole in cases of the clusters PAC and ATL (MED and ASIA). The second pole means the northerly (westerly) located pole in cases of the clusters PAC and ATL (MED and ASIA). The column *Correlation* contains the Pearson correlation values associated with the ACs while the columns *Distance1* and *Distance2* contain the distances between the first/second poles of the ACs and the first/second poles of the ACs of the reference clusters while their averages are in the column *Average distance*. The columns *First occurrence* and *Last occurrence* contain the percentiles (i.e., thresholds) associated with CP maps in which the ACs are observable for the first and last time. The columns *Frequency* and *Order* contain the number of CP maps in which the given cluster can be identified and the order of the cluster based on its frequency. (E.g. the cluster PAC is observable in 39 CP maps in case of each GCM/reanalysis and in each time period and it is the most frequently observable cluster therefore its order is 1.) The name of the teleconnection/cluster which is represented by the ACs is in column *Teleconnection/cluster*. The percentile values corresponding to the CP maps, which were chosen as the most similar CP maps relative to the reference CP maps, are in column *Optimal percentile*. The associated  $MCC_{max}$  value is in the column *Optimal  $MCC_{max}$* . The column *Max. percentile* contains the percentile values corresponding to the CP map which is associated with the maximum value of the MCC. The latter MCC value is in the column *Global  $MCC_{max}$* . The type of the clusters represented with the given pair of ACs is in column *Type* in accordance with Section 3.3.1.

| GCM/reanalysis<br>name | Analyzed<br>time period | Lati-tu<br>de1 | Longi-tu<br>de1 | Lati-tu<br>de2 | Longi-<br>tude2 | Corre-l<br>ation | Dis-<br>tance1<br>(km) | Dis-<br>tance2<br>(km) | Average<br>distance<br>(km) | First<br>occur-<br>rence | Last<br>occur-<br>rence | Fre-<br>quen-<br>cy | Order | Telecon-<br>nection/<br>cluster | Optimal<br>per-<br>centile | Optimal<br>$MCC_{max}$ | Max.<br>per-<br>centile | Global<br>$MCC_{max}$ | Type |
|------------------------|-------------------------|----------------|-----------------|----------------|-----------------|------------------|------------------------|------------------------|-----------------------------|--------------------------|-------------------------|---------------------|-------|---------------------------------|----------------------------|------------------------|-------------------------|-----------------------|------|
| ERA-20C                | 1951–1980               | 17.5           | –180            | 47.5           | –175            | –0.65            | 0                      | 0                      | 0                           | 2.5                      | 97.5                    | 39                  | 1     | PAC                             | 17.5                       | 1.00                   | 17.5                    | 1.00                  | 1    |
| ERA-20C                | 1951–1980               | 22.5           | –35             | 50             | –30             | –0.50            | 0                      | 0                      | 0                           | 5                        | 50                      | 19                  | 3     | ATL                             | 17.5                       | 1.00                   | 17.5                    | 1.00                  | 1    |
| ERA-20C                | 1951–1980               | 42.5           | 100             | 62.5           | 65              | –0.47            | 0                      | 0                      | 0                           | 7.5                      | 55                      | 20                  | 2     | ASIA                            | 17.5                       | 1.00                   | 17.5                    | 1.00                  | 1    |
| ERA-20C                | 1951–1980               | 22.5           | 27.5            | 37.5           | 5               | –0.44            | 0                      | 0                      | 0                           | 12.5                     | 37.5                    | 11                  | 4     | MED                             | 17.5                       | 1.00                   | 17.5                    | 1.00                  | 1    |
| ERA-20C                | 1956–1985               | 17.5           | –180            | 47.5           | –172.5          | –0.66            | 0                      | 0                      | 0                           | 2.5                      | 97.5                    | 39                  | 1     | PAC                             | 20                         | 1.00                   | 20                      | 1.00                  | 1    |
| ERA-20C                | 1956–1985               | 22.5           | –35             | 50             | –30             | –0.49            | 0                      | 0                      | 0                           | 5                        | 20                      | 7                   | 4     | ATL                             | 20                         | 1.00                   | 20                      | 1.00                  | 1    |
| ERA-20C                | 1956–1985               | 42.5           | 100             | 62.5           | 62.5            | –0.48            | 0                      | 0                      | 0                           | 7.5                      | 52.5                    | 19                  | 2     | ASIA                            | 20                         | 1.00                   | 20                      | 1.00                  | 1    |
| ERA-20C                | 1956–1985               | 22.5           | 27.5            | 37.5           | 5               | –0.41            | 0                      | 0                      | 0                           | 20                       | 42.5                    | 10                  | 3     | MED                             | 20                         | 1.00                   | 20                      | 1.00                  | 1    |
| ERA-20C                | 1961–1990               | 17.5           | –177.5          | 47.5           | –170            | –0.63            | 0                      | 0                      | 0                           | 2.5                      | 97.5                    | 39                  | 1     | PAC                             | 27.5                       | 1.00                   | 27.5                    | 1.00                  | 1    |
| ERA-20C                | 1961–1990               | 22.5           | –35             | 50             | –27.5           | –0.50            | 0                      | 0                      | 0                           | 5                        | 50                      | 19                  | 3     | ATL                             | 27.5                       | 1.00                   | 27.5                    | 1.00                  | 1    |
| ERA-20C                | 1961–1990               | 45             | 100             | 62.5           | 60              | –0.49            | 0                      | 0                      | 0                           | 5                        | 57.5                    | 22                  | 2     | ASIA                            | 27.5                       | 1.00                   | 27.5                    | 1.00                  | 1    |
| ERA-20C                | 1961–1990               | 27.5           | 35              | 40             | 10              | –0.40            | 0                      | 0                      | 0                           | 27.5                     | 37.5                    | 5                   | 5     | MED                             | 27.5                       | 1.00                   | 27.5                    | 1.00                  | 1    |
| ERA-20C                | 1966–1995               | 17.5           | –177.5          | 47.5           | –172.5          | –0.63            | 0                      | 0                      | 0                           | 2.5                      | 97.5                    | 39                  | 1     | PAC                             | 27.5                       | 1.00                   | 27.5                    | 1.00                  | 1    |
| ERA-20C                | 1966–1995               | 25             | –35             | 52.5           | –25             | –0.48            | 0                      | 0                      | 0                           | 5                        | 50                      | 19                  | 3     | ATL                             | 27.5                       | 1.00                   | 27.5                    | 1.00                  | 1    |
| ERA-20C                | 1966–1995               | 42.5           | 100             | 60             | 60              | –0.50            | 0                      | 0                      | 0                           | 5                        | 55                      | 21                  | 2     | ASIA                            | 27.5                       | 1.00                   | 27.5                    | 1.00                  | 1    |



|              |           |      |        |      |        |       |     |     |     |      |      |    |   |      |      |      |      |      |   |
|--------------|-----------|------|--------|------|--------|-------|-----|-----|-----|------|------|----|---|------|------|------|------|------|---|
| ERA-20C      | 1966–1995 | 25   | 35     | 40   | 12.5   | −0.42 | 0   | 0   | 0   | 17.5 | 42.5 | 11 | 4 | MED  | 27.5 | 1.00 | 27.5 | 1.00 | 1 |
| ERA-20C      | 1971–2000 | 17.5 | −175   | 47.5 | −170   | −0.62 | 0   | 0   | 0   | 2.5  | 97.5 | 39 | 1 | PAC  | 25   | 1.00 | 25   | 1.00 | 1 |
| ERA-20C      | 1971–2000 | 25   | −32.5  | 52.5 | −22.5  | −0.48 | 0   | 0   | 0   | 5    | 52.5 | 20 | 2 | ATL  | 25   | 1.00 | 25   | 1.00 | 1 |
| ERA-20C      | 1971–2000 | 42.5 | 100    | 60   | 60     | −0.48 | 0   | 0   | 0   | 7.5  | 55   | 20 | 3 | ASIA | 25   | 1.00 | 25   | 1.00 | 1 |
| ERA-20C      | 1971–2000 | 25   | 37.5   | 37.5 | 15     | −0.43 | 0   | 0   | 0   | 15   | 32.5 | 8  | 4 | MED  | 25   | 1.00 | 25   | 1.00 | 1 |
| ERA-20C      | 1976–2005 | 15   | −172.5 | 45   | −165   | −0.64 | 0   | 0   | 0   | 2.5  | 97.5 | 39 | 1 | PAC  | 25   | 1.00 | 25   | 1.00 | 1 |
| ERA-20C      | 1976–2005 | 25   | −32.5  | 52.5 | −22.5  | −0.46 | 0   | 0   | 0   | 7.5  | 47.5 | 17 | 3 | ATL  | 25   | 1.00 | 25   | 1.00 | 1 |
| ERA-20C      | 1976–2005 | 42.5 | 100    | 62.5 | 62.5   | −0.48 | 0   | 0   | 0   | 7.5  | 55   | 20 | 2 | ASIA | 25   | 1.00 | 25   | 1.00 | 1 |
| ERA-20C      | 1976–2005 | 22.5 | 30     | 37.5 | 7.5    | −0.41 | 0   | 0   | 0   | 22.5 | 25   | 2  | 5 | MED  | 25   | 1.00 | 25   | 1.00 | 1 |
| NCEP/NCAR R1 | 1951–1980 | 17.5 | −180   | 47.5 | −172.5 | −0.64 | 0   | 188 | 94  | 2.5  | 97.5 | 39 | 1 | PAC  | 17.5 | 0.83 | 17.5 | 0.83 | 1 |
| NCEP/NCAR R1 | 1951–1980 | 25   | −32.5  | 52.5 | −30    | −0.47 | 377 | 278 | 327 | 7.5  | 40   | 14 | 3 | ATL  | 17.5 | 0.83 | 17.5 | 0.83 | 1 |
| NCEP/NCAR R1 | 1951–1980 | 45   | 107.5  | 70   | 75     | −0.43 | 663 | 944 | 803 | 12.5 | 50   | 16 | 2 | ASIA | 17.5 | 0.83 | 17.5 | 0.83 | 1 |
| NCEP/NCAR R1 | 1951–1980 | 25   | 30     | 37.5 | 5      | −0.42 | 377 | 0   | 188 | 15   | 32.5 | 8  | 4 | MED  | 17.5 | 0.83 | 17.5 | 0.83 | 1 |
| NCEP/NCAR R1 | 1956–1985 | 17.5 | −177.5 | 47.5 | −170   | −0.64 | 265 | 188 | 226 | 2.5  | 97.5 | 39 | 1 | PAC  | 27.5 | 0.77 | 20   | 0.83 | 1 |
| NCEP/NCAR R1 | 1956–1985 | 25   | −35    | 52.5 | −30    | −0.46 | 278 | 278 | 278 | 10   | 17.5 | 4  | 4 | ATL  | 27.5 | 0.77 | 20   | 0.83 | 3 |
| NCEP/NCAR R1 | 1956–1985 | 45   | 105    | 67.5 | 67.5   | −0.43 | 488 | 603 | 546 | 15   | 52.5 | 16 | 2 | ASIA | 27.5 | 0.77 | 20   | 0.83 | 1 |
| NCEP/NCAR R1 | 1956–1985 | 25   | 32.5   | 37.5 | 7.5    | −0.39 | 580 | 221 | 400 | 27.5 | 40   | 6  | 3 | MED  | 27.5 | 0.77 | 20   | 0.83 | 1 |
| NCEP/NCAR R1 | 1961–1990 | 17.5 | −177.5 | 47.5 | −170   | −0.62 | 0   | 0   | 0   | 2.5  | 97.5 | 39 | 1 | PAC  | 35   | 0.81 | 35   | 0.81 | 1 |
| NCEP/NCAR R1 | 1961–1990 | 27.5 | −32.5  | 55   | −27.5  | −0.47 | 610 | 556 | 583 | 7.5  | 47.5 | 17 | 3 | ATL  | 35   | 0.81 | 35   | 0.81 | 1 |
| NCEP/NCAR R1 | 1961–1990 | 45   | 102.5  | 65   | 62.5   | −0.44 | 197 | 304 | 250 | 12.5 | 57.5 | 19 | 2 | ASIA | 35   | 0.81 | 35   | 0.81 | 1 |
| NCEP/NCAR R1 | 1961–1990 | 27.5 | 35     | 40   | 10     | −0.40 | 0   | 0   | 0   | 22.5 | 37.5 | 7  | 4 | MED  | 35   | 0.81 | 35   | 0.81 | 1 |
| NCEP/NCAR R1 | 1966–1995 | 17.5 | −177.5 | 47.5 | −170   | −0.62 | 0   | 188 | 94  | 2.5  | 97.5 | 39 | 1 | PAC  | 27.5 | 0.87 | 27.5 | 0.87 | 1 |
| NCEP/NCAR R1 | 1966–1995 | 25   | −32.5  | 52.5 | −25    | −0.47 | 252 | 0   | 126 | 7.5  | 50   | 18 | 3 | ATL  | 27.5 | 0.87 | 27.5 | 0.87 | 1 |
| NCEP/NCAR R1 | 1966–1995 | 42.5 | 97.5   | 60   | 60     | −0.45 | 205 | 0   | 102 | 7.5  | 52.5 | 19 | 2 | ASIA | 27.5 | 0.87 | 27.5 | 0.87 | 1 |
| NCEP/NCAR R1 | 1966–1995 | 25   | 35     | 40   | 12.5   | −0.42 | 0   | 0   | 0   | 17.5 | 40   | 10 | 4 | MED  | 27.5 | 0.87 | 27.5 | 0.87 | 1 |
| NCEP/NCAR R1 | 1971–2000 | 17.5 | −175   | 47.5 | −167.5 | −0.62 | 0   | 188 | 94  | 2.5  | 97.5 | 39 | 1 | PAC  | 25   | 0.85 | 25   | 0.85 | 1 |
| NCEP/NCAR R1 | 1971–2000 | 25   | −32.5  | 52.5 | −22.5  | −0.47 | 0   | 0   | 0   | 7.5  | 47.5 | 17 | 3 | ATL  | 25   | 0.85 | 25   | 0.85 | 1 |
| NCEP/NCAR R1 | 1971–2000 | 42.5 | 100    | 60   | 62.5   | −0.45 | 0   | 139 | 69  | 10   | 62.5 | 22 | 2 | ASIA | 25   | 0.85 | 25   | 0.85 | 1 |
| NCEP/NCAR R1 | 1971–2000 | 25   | 37.5   | 37.5 | 15     | −0.42 | 0   | 0   | 0   | 17.5 | 32.5 | 7  | 4 | MED  | 25   | 0.85 | 25   | 0.85 | 1 |
| NCEP/NCAR R1 | 1976–2005 | 17.5 | −175   | 47.5 | −165   | −0.63 | 385 | 278 | 332 | 2.5  | 97.5 | 39 | 1 | PAC  | 25   | 0.90 | 25   | 0.90 | 1 |
| NCEP/NCAR R1 | 1976–2005 | 25   | −32.5  | 52.5 | −22.5  | −0.47 | 0   | 0   | 0   | 7.5  | 47.5 | 17 | 3 | ATL  | 25   | 0.90 | 25   | 0.90 | 1 |
| NCEP/NCAR R1 | 1976–2005 | 42.5 | 100    | 62.5 | 62.5   | −0.46 | 0   | 0   | 0   | 7.5  | 60   | 22 | 2 | ASIA | 25   | 0.90 | 25   | 0.90 | 1 |

|              |           |      |        |      |        |       |      |      |      |      |      |    |   |      |      |      |      |      |   |
|--------------|-----------|------|--------|------|--------|-------|------|------|------|------|------|----|---|------|------|------|------|------|---|
| NCEP/NCAR R1 | 1976–2005 | 25   | 35     | 37.5 | 10     | −0.41 | 580  | 221  | 400  | 22.5 | 25   | 2  | 5 | MED  | 25   | 0.90 | 25   | 0.90 | 1 |
| ACCESS1-0    | 1951–1980 | 17.5 | −170   | 45   | −167.5 | −0.60 | 1060 | 640  | 850  | 2.5  | 97.5 | 39 | 1 | PAC  | 25   | 0.60 | 25   | 0.60 | 1 |
| ACCESS1-0    | 1951–1980 | 45   | 102.5  | 67.5 | 65     | −0.48 | 343  | 556  | 449  | 5    | 47.5 | 18 | 2 | ASIA | 25   | 0.60 | 25   | 0.60 | 1 |
| ACCESS1-0    | 1951–1980 | 22.5 | 35     | 35   | 12.5   | −0.43 | 770  | 727  | 749  | 12.5 | 35   | 10 | 4 | MED  | 25   | 0.60 | 25   | 0.60 | 1 |
| ACCESS1-0    | 1951–1980 | 17.5 | −52.5  | 40   | −65    | −0.45 | 1910 | 2935 | 2422 | 10   | 45   | 15 | 3 | ATL  | 25   | 0.60 | 25   | 0.60 | 2 |
| ACCESS1-0    | 1956–1985 | 17.5 | −170   | 45   | −167.5 | −0.62 | 1060 | 474  | 767  | 2.5  | 97.5 | 39 | 1 | PAC  | 22.5 | 0.61 | 22.5 | 0.61 | 1 |
| ACCESS1-0    | 1956–1985 | 22.5 | −50    | 47.5 | −57.5  | −0.46 | 1540 | 2024 | 1782 | 10   | 47.5 | 16 | 3 | ATL  | 22.5 | 0.61 | 22.5 | 0.61 | 1 |
| ACCESS1-0    | 1956–1985 | 45   | 100    | 65   | 60     | −0.51 | 278  | 304  | 291  | 5    | 55   | 21 | 2 | ASIA | 22.5 | 0.61 | 22.5 | 0.61 | 1 |
| ACCESS1-0    | 1956–1985 | 20   | 57.5   | 32.5 | 35     | −0.41 | 3116 | 2776 | 2946 | 17.5 | 40   | 10 | 4 | MED  | 22.5 | 0.61 | 22.5 | 0.61 | 2 |
| ACCESS1-0    | 1961–1990 | 17.5 | −170   | 45   | −167.5 | −0.62 | 795  | 338  | 567  | 2.5  | 97.5 | 39 | 1 | PAC  | 37.5 | 0.65 | 37.5 | 0.65 | 1 |
| ACCESS1-0    | 1961–1990 | 45   | 105    | 70   | 72.5   | −0.51 | 393  | 1000 | 697  | 5    | 60   | 23 | 2 | ASIA | 37.5 | 0.65 | 37.5 | 0.65 | 1 |
| ACCESS1-0    | 1961–1990 | 22.5 | 57.5   | 30   | 32.5   | −0.45 | 2331 | 2322 | 2327 | 10   | 40   | 13 | 4 | MED  | 37.5 | 0.65 | 37.5 | 0.65 | 1 |
| ACCESS1-0    | 1961–1990 | 20   | −52.5  | 45   | −60    | −0.45 | 1834 | 2483 | 2158 | 10   | 40   | 13 | 3 | ATL  | 37.5 | 0.65 | 37.5 | 0.65 | 2 |
| ACCESS1-0    | 1966–1995 | 17.5 | −170   | 45   | −165   | −0.64 | 795  | 640  | 718  | 2.5  | 97.5 | 39 | 1 | PAC  | 35   | 0.62 | 35   | 0.62 | 1 |
| ACCESS1-0    | 1966–1995 | 45   | 105    | 70   | 72.5   | −0.51 | 488  | 1252 | 870  | 5    | 55   | 21 | 2 | ASIA | 35   | 0.62 | 35   | 0.62 | 1 |
| ACCESS1-0    | 1966–1995 | 20   | −52.5  | 45   | −57.5  | −0.47 | 1880 | 2499 | 2190 | 10   | 35   | 11 | 4 | ATL  | 35   | 0.62 | 35   | 0.62 | 2 |
| ACCESS1-0    | 1966–1995 | 22.5 | 57.5   | 32.5 | 35     | −0.46 | 2304 | 2175 | 2240 | 12.5 | 45   | 14 | 3 | MED  | 35   | 0.62 | 35   | 0.62 | 2 |
| ACCESS1-0    | 1971–2000 | 17.5 | −170   | 45   | −165   | −0.66 | 530  | 474  | 502  | 2.5  | 97.5 | 39 | 1 | PAC  | 12.5 | 0.49 | 47.5 | 0.50 | 1 |
| ACCESS1-0    | 1971–2000 | 45   | 105    | 70   | 72.5   | −0.51 | 488  | 1252 | 870  | 5    | 52.5 | 20 | 2 | ASIA | 12.5 | 0.49 | 47.5 | 0.50 | 1 |
| ACCESS1-0    | 1971–2000 | 20   | −52.5  | 45   | −57.5  | −0.48 | 2126 | 2668 | 2397 | 10   | 25   | 7  | 4 | ATL  | 12.5 | 0.49 | 47.5 | 0.50 | 2 |
| ACCESS1-0    | 1971–2000 | 22.5 | 57.5   | 32.5 | 35     | −0.45 | 2053 | 1900 | 1976 | 12.5 | 45   | 14 | 3 | MED  | 12.5 | 0.49 | 47.5 | 0.50 | 2 |
| ACCESS1-0    | 1976–2005 | 17.5 | −172.5 | 45   | −167.5 | −0.65 | 278  | 197  | 237  | 2.5  | 97.5 | 39 | 1 | PAC  | 27.5 | 0.54 | 37.5 | 0.58 | 1 |
| ACCESS1-0    | 1976–2005 | 47.5 | 105    | 70   | 65     | −0.49 | 681  | 841  | 761  | 7.5  | 52.5 | 19 | 2 | ASIA | 27.5 | 0.54 | 37.5 | 0.58 | 1 |
| ACCESS1-0    | 1976–2005 | 20   | −52.5  | 45   | −57.5  | −0.50 | 2126 | 2668 | 2397 | 5    | 27.5 | 10 | 4 | ATL  | 27.5 | 0.54 | 37.5 | 0.58 | 2 |
| ACCESS1-0    | 1976–2005 | 20   | 55     | 30   | 32.5   | −0.43 | 2603 | 2448 | 2525 | 15   | 50   | 15 | 3 | MED  | 27.5 | 0.54 | 37.5 | 0.58 | 2 |
| ACCESS1-3    | 1951–1980 | 17.5 | −170   | 45   | −167.5 | −0.60 | 1060 | 640  | 850  | 2.5  | 97.5 | 39 | 1 | PAC  | 17.5 | 0.49 | 17.5 | 0.49 | 1 |
| ACCESS1-3    | 1951–1980 | 17.5 | −55    | 42.5 | −60    | −0.43 | 2160 | 2433 | 2297 | 12.5 | 30   | 8  | 4 | ATL  | 17.5 | 0.49 | 17.5 | 0.49 | 1 |
| ACCESS1-3    | 1951–1980 | 42.5 | 102.5  | 60   | 65     | −0.46 | 205  | 278  | 241  | 7.5  | 47.5 | 17 | 2 | ASIA | 17.5 | 0.49 | 17.5 | 0.49 | 1 |
| ACCESS1-3    | 1951–1980 | 25   | 27.5   | 37.5 | 2.5    | −0.46 | 278  | 221  | 249  | 7.5  | 37.5 | 13 | 3 | MED  | 17.5 | 0.49 | 17.5 | 0.49 | 1 |
| ACCESS1-3    | 1956–1985 | 17.5 | −170   | 45   | −167.5 | −0.61 | 1060 | 474  | 767  | 2.5  | 97.5 | 39 | 1 | PAC  | 22.5 | 0.53 | 22.5 | 0.53 | 1 |
| ACCESS1-3    | 1956–1985 | 42.5 | 100    | 62.5 | 65     | −0.44 | 0    | 128  | 64   | 7.5  | 50   | 18 | 2 | ASIA | 22.5 | 0.53 | 22.5 | 0.53 | 1 |
| ACCESS1-3    | 1956–1985 | 25   | 27.5   | 37.5 | 2.5    | −0.43 | 278  | 221  | 249  | 10   | 30   | 9  | 4 | MED  | 22.5 | 0.53 | 22.5 | 0.53 | 1 |

|           |           |      |        |      |        |       |      |      |      |      |      |    |   |      |      |      |      |      |   |
|-----------|-----------|------|--------|------|--------|-------|------|------|------|------|------|----|---|------|------|------|------|------|---|
| ACCESS1-3 | 1956–1985 | 15   | −55    | 40   | −62.5  | −0.44 | 2262 | 2759 | 2510 | 7.5  | 42.5 | 15 | 3 | ATL  | 22.5 | 0.53 | 22.5 | 0.53 | 2 |
| ACCESS1-3 | 1961–1990 | 17.5 | −170   | 45   | −167.5 | −0.60 | 795  | 338  | 567  | 2.5  | 97.5 | 39 | 1 | PAC  | 30   | 0.56 | 37.5 | 0.59 | 1 |
| ACCESS1-3 | 1961–1990 | 42.5 | 100    | 60   | 62.5   | −0.41 | 278  | 308  | 293  | 12.5 | 50   | 16 | 2 | ASIA | 30   | 0.56 | 37.5 | 0.59 | 1 |
| ACCESS1-3 | 1961–1990 | 17.5 | −52.5  | 42.5 | −60    | −0.44 | 1910 | 2610 | 2260 | 7.5  | 40   | 14 | 3 | ATL  | 30   | 0.56 | 37.5 | 0.59 | 2 |
| ACCESS1-3 | 1961–1990 | 22.5 | 57.5   | 32.5 | 35     | −0.42 | 2331 | 2382 | 2357 | 10   | 30   | 9  | 4 | MED  | 30   | 0.56 | 37.5 | 0.59 | 2 |
| ACCESS1-3 | 1966–1995 | 17.5 | −170   | 45   | −167.5 | −0.60 | 795  | 474  | 635  | 2.5  | 97.5 | 39 | 1 | PAC  | 25   | 0.55 | 45   | 0.55 | 1 |
| ACCESS1-3 | 1966–1995 | 20   | −50    | 45   | −55    | −0.45 | 1637 | 2332 | 1984 | 7.5  | 40   | 14 | 2 | ATL  | 25   | 0.55 | 45   | 0.55 | 1 |
| ACCESS1-3 | 1966–1995 | 42.5 | 100    | 62.5 | 62.5   | −0.42 | 0    | 308  | 154  | 12.5 | 30   | 8  | 4 | ASIA | 25   | 0.55 | 45   | 0.55 | 1 |
| ACCESS1-3 | 1966–1995 | 22.5 | 60     | 32.5 | 37.5   | −0.43 | 2556 | 2382 | 2469 | 10   | 30   | 9  | 3 | MED  | 25   | 0.55 | 45   | 0.55 | 1 |
| ACCESS1-3 | 1971–2000 | 17.5 | −170   | 45   | −165   | −0.60 | 530  | 474  | 502  | 2.5  | 97.5 | 39 | 1 | PAC  | 30   | 0.52 | 37.5 | 0.56 | 1 |
| ACCESS1-3 | 1971–2000 | 50   | 110    | 75   | 72.5   | −0.41 | 1132 | 1742 | 1437 | 15   | 35   | 9  | 3 | ASIA | 30   | 0.52 | 37.5 | 0.56 | 1 |
| ACCESS1-3 | 1971–2000 | 25   | 35     | 35   | 12.5   | −0.42 | 252  | 357  | 305  | 12.5 | 30   | 8  | 4 | MED  | 30   | 0.52 | 37.5 | 0.56 | 1 |
| ACCESS1-3 | 1971–2000 | 17.5 | −52.5  | 42.5 | −60    | −0.49 | 2231 | 2987 | 2609 | 7.5  | 32.5 | 11 | 2 | ATL  | 30   | 0.52 | 37.5 | 0.56 | 2 |
| ACCESS1-3 | 1976–2005 | 17.5 | −157.5 | 45   | −150   | −0.59 | 1625 | 1178 | 1401 | 2.5  | 97.5 | 39 | 1 | PAC  | 25   | 0.55 | 35   | 0.59 | 1 |
| ACCESS1-3 | 1976–2005 | 50   | 105    | 72.5 | 62.5   | −0.44 | 918  | 1112 | 1015 | 10   | 47.5 | 16 | 2 | ASIA | 25   | 0.55 | 35   | 0.59 | 1 |
| ACCESS1-3 | 1976–2005 | 22.5 | 57.5   | 30   | 32.5   | −0.42 | 2821 | 2448 | 2635 | 12.5 | 25   | 6  | 4 | MED  | 25   | 0.55 | 35   | 0.59 | 1 |
| ACCESS1-3 | 1976–2005 | 17.5 | −55    | 42.5 | −62.5  | −0.50 | 2472 | 3156 | 2814 | 5    | 30   | 11 | 3 | ATL  | 25   | 0.55 | 35   | 0.59 | 2 |
| CCSM4     | 1951–1980 | 22.5 | −175   | 55   | −175   | −0.61 | 763  | 834  | 798  | 2.5  | 97.5 | 39 | 1 | PAC  | 25   | 0.46 | 25   | 0.46 | 1 |
| CCSM4     | 1951–1980 | 25   | −50    | 52.5 | −57.5  | −0.37 | 1551 | 1922 | 1736 | 22.5 | 37.5 | 7  | 4 | ATL  | 25   | 0.46 | 25   | 0.46 | 1 |
| CCSM4     | 1951–1980 | 45   | 105    | 62.5 | 55     | −0.39 | 488  | 513  | 501  | 15   | 47.5 | 14 | 2 | ASIA | 25   | 0.46 | 25   | 0.46 | 1 |
| CCSM4     | 1951–1980 | 30   | 35     | 47.5 | 7.5    | −0.36 | 1120 | 1131 | 1125 | 25   | 47.5 | 10 | 3 | MED  | 25   | 0.46 | 25   | 0.46 | 1 |
| CCSM4     | 1956–1985 | 22.5 | −172.5 | 57.5 | −172.5 | −0.59 | 961  | 1112 | 1036 | 2.5  | 97.5 | 39 | 1 | PAC  | 35   | 0.45 | 22.5 | 0.53 | 1 |
| CCSM4     | 1956–1985 | 25   | −47.5  | 52.5 | −57.5  | −0.38 | 1302 | 1922 | 1612 | 20   | 42.5 | 10 | 3 | ATL  | 35   | 0.45 | 22.5 | 0.53 | 1 |
| CCSM4     | 1956–1985 | 45   | 102.5  | 60   | 52.5   | −0.42 | 343  | 602  | 472  | 12.5 | 50   | 16 | 2 | ASIA | 35   | 0.45 | 22.5 | 0.53 | 1 |
| CCSM4     | 1956–1985 | 30   | 32.5   | 47.5 | 5      | −0.35 | 971  | 1112 | 1042 | 35   | 52.5 | 8  | 4 | MED  | 35   | 0.45 | 22.5 | 0.53 | 1 |
| CCSM4     | 1961–1990 | 22.5 | −175   | 57.5 | −172.5 | −0.60 | 614  | 1125 | 869  | 2.5  | 97.5 | 39 | 1 | PAC  | 35   | 0.38 | 7.5  | 0.42 | 1 |
| CCSM4     | 1961–1990 | 27.5 | −45    | 52.5 | −62.5  | −0.40 | 1150 | 2428 | 1789 | 17.5 | 37.5 | 9  | 3 | ATL  | 35   | 0.38 | 7.5  | 0.42 | 1 |
| CCSM4     | 1961–1990 | 45   | 100    | 60   | 47.5   | −0.41 | 0    | 723  | 361  | 15   | 45   | 13 | 2 | ASIA | 35   | 0.38 | 7.5  | 0.42 | 1 |
| CCSM4     | 1961–1990 | 22.5 | 27.5   | 40   | 7.5    | −0.35 | 938  | 213  | 575  | 35   | 55   | 9  | 4 | MED  | 35   | 0.38 | 7.5  | 0.42 | 1 |
| CCSM4     | 1966–1995 | 20   | −175   | 52.5 | −172.5 | −0.62 | 383  | 556  | 469  | 2.5  | 97.5 | 39 | 1 | PAC  | 32.5 | 0.42 | 22.5 | 0.46 | 1 |
| CCSM4     | 1966–1995 | 25   | −47.5  | 52.5 | −62.5  | −0.37 | 1259 | 2510 | 1884 | 27.5 | 42.5 | 7  | 4 | ATL  | 32.5 | 0.42 | 22.5 | 0.46 | 1 |
| CCSM4     | 1966–1995 | 45   | 102.5  | 62.5 | 52.5   | −0.43 | 343  | 488  | 415  | 12.5 | 42.5 | 13 | 2 | ASIA | 32.5 | 0.42 | 22.5 | 0.46 | 1 |

|         |           |      |        |      |        |       |      |      |      |      |      |    |   |      |      |      |      |      |   |
|---------|-----------|------|--------|------|--------|-------|------|------|------|------|------|----|---|------|------|------|------|------|---|
| CCSM4   | 1966–1995 | 22.5 | 27.5   | 40   | 5      | −0.35 | 812  | 639  | 725  | 32.5 | 52.5 | 9  | 3 | MED  | 32.5 | 0.42 | 22.5 | 0.46 | 1 |
| CCSM4   | 1971–2000 | 20   | −177.5 | 52.5 | −172.5 | −0.63 | 383  | 584  | 483  | 2.5  | 97.5 | 39 | 1 | PAC  | 32.5 | 0.37 | 17.5 | 0.48 | 1 |
| CCSM4   | 1971–2000 | 25   | −47.5  | 52.5 | −62.5  | −0.39 | 1511 | 2673 | 2092 | 20   | 35   | 7  | 4 | ATL  | 32.5 | 0.37 | 17.5 | 0.48 | 1 |
| CCSM4   | 1971–2000 | 45   | 102.5  | 65   | 52.5   | −0.44 | 343  | 675  | 509  | 10   | 35   | 11 | 3 | ASIA | 32.5 | 0.37 | 17.5 | 0.48 | 1 |
| CCSM4   | 1971–2000 | 22.5 | 27.5   | 37.5 | 5      | −0.36 | 1055 | 882  | 968  | 32.5 | 60   | 12 | 2 | MED  | 32.5 | 0.37 | 17.5 | 0.48 | 1 |
| CCSM4   | 1976–2005 | 17.5 | −172.5 | 50   | −167.5 | −0.63 | 278  | 587  | 432  | 2.5  | 97.5 | 39 | 1 | PAC  | 27.5 | 0.41 | 12.5 | 0.49 | 1 |
| CCSM4   | 1976–2005 | 27.5 | −45    | 52.5 | −65    | −0.38 | 1277 | 2835 | 2056 | 27.5 | 40   | 6  | 3 | ATL  | 27.5 | 0.41 | 12.5 | 0.49 | 1 |
| CCSM4   | 1976–2005 | 45   | 100    | 67.5 | 52.5   | −0.44 | 278  | 726  | 502  | 10   | 32.5 | 10 | 2 | ASIA | 27.5 | 0.41 | 12.5 | 0.49 | 1 |
| CCSM4   | 1976–2005 | 22.5 | 27.5   | 37.5 | 5      | −0.35 | 257  | 221  | 239  | 47.5 | 57.5 | 5  | 4 | MED  | 27.5 | 0.41 | 12.5 | 0.49 | 3 |
| CMCC-CM | 1951–1980 | 17.5 | −172.5 | 50   | −170   | −0.59 | 795  | 460  | 628  | 2.5  | 97.5 | 39 | 1 | PAC  | 25   | 0.53 | 25   | 0.53 | 1 |
| CMCC-CM | 1951–1980 | 25   | −2.5   | 47.5 | −22.5  | −0.42 | 3312 | 616  | 1964 | 12.5 | 37.5 | 11 | 3 | ATL  | 25   | 0.53 | 25   | 0.53 | 1 |
| CMCC-CM | 1951–1980 | 42.5 | 100    | 62.5 | 60     | −0.44 | 0    | 257  | 128  | 10   | 42.5 | 14 | 2 | ASIA | 25   | 0.53 | 25   | 0.53 | 1 |
| CMCC-CM | 1951–1980 | 25   | 52.5   | 35   | 27.5   | −0.38 | 2556 | 2032 | 2294 | 22.5 | 32.5 | 5  | 4 | MED  | 25   | 0.53 | 25   | 0.53 | 2 |
| CMCC-CM | 1956–1985 | 17.5 | −172.5 | 50   | −172.5 | −0.60 | 795  | 278  | 537  | 2.5  | 97.5 | 39 | 1 | PAC  | 22.5 | 0.61 | 22.5 | 0.61 | 1 |
| CMCC-CM | 1956–1985 | 22.5 | −40    | 47.5 | −52.5  | −0.42 | 514  | 1666 | 1090 | 12.5 | 45   | 14 | 3 | ATL  | 22.5 | 0.61 | 22.5 | 0.61 | 1 |
| CMCC-CM | 1956–1985 | 45   | 102.5  | 65   | 62.5   | −0.43 | 343  | 278  | 310  | 10   | 50   | 17 | 2 | ASIA | 22.5 | 0.61 | 22.5 | 0.61 | 1 |
| CMCC-CM | 1956–1985 | 22.5 | 52.5   | 35   | 27.5   | −0.40 | 2565 | 2032 | 2298 | 17.5 | 32.5 | 7  | 4 | MED  | 22.5 | 0.61 | 22.5 | 0.61 | 2 |
| CMCC-CM | 1961–1990 | 20   | −175   | 50   | −177.5 | −0.60 | 383  | 616  | 499  | 2.5  | 97.5 | 39 | 1 | PAC  | 37.5 | 0.61 | 45   | 0.62 | 1 |
| CMCC-CM | 1961–1990 | 20   | −5     | 40   | −30    | −0.41 | 3116 | 1129 | 2123 | 15   | 37.5 | 10 | 4 | ATL  | 37.5 | 0.61 | 45   | 0.62 | 1 |
| CMCC-CM | 1961–1990 | 45   | 102.5  | 67.5 | 62.5   | −0.44 | 197  | 568  | 382  | 10   | 50   | 17 | 2 | ASIA | 37.5 | 0.61 | 45   | 0.62 | 1 |
| CMCC-CM | 1961–1990 | 22.5 | 52.5   | 35   | 27.5   | −0.43 | 1847 | 1637 | 1742 | 12.5 | 47.5 | 15 | 3 | MED  | 37.5 | 0.61 | 45   | 0.62 | 2 |
| CMCC-CM | 1966–1995 | 17.5 | −175   | 50   | −175   | −0.62 | 265  | 333  | 299  | 2.5  | 97.5 | 39 | 1 | PAC  | 32.5 | 0.69 | 32.5 | 0.69 | 1 |
| CMCC-CM | 1966–1995 | 25   | −45    | 52.5 | −45    | −0.40 | 1008 | 1349 | 1179 | 15   | 42.5 | 12 | 4 | ATL  | 32.5 | 0.69 | 32.5 | 0.69 | 1 |
| CMCC-CM | 1966–1995 | 42.5 | 100    | 65   | 60     | −0.45 | 0    | 556  | 278  | 7.5  | 55   | 20 | 2 | ASIA | 32.5 | 0.69 | 32.5 | 0.69 | 1 |
| CMCC-CM | 1966–1995 | 22.5 | 47.5   | 35   | 22.5   | −0.42 | 1302 | 1042 | 1172 | 12.5 | 45   | 14 | 3 | MED  | 32.5 | 0.69 | 32.5 | 0.69 | 1 |
| CMCC-CM | 1971–2000 | 20   | −175   | 50   | −177.5 | −0.61 | 278  | 616  | 447  | 2.5  | 97.5 | 39 | 1 | PAC  | 22.5 | 0.62 | 22.5 | 0.62 | 1 |
| CMCC-CM | 1971–2000 | 22.5 | −40    | 50   | −42.5  | −0.41 | 812  | 1415 | 1113 | 12.5 | 42.5 | 13 | 3 | ATL  | 22.5 | 0.62 | 22.5 | 0.62 | 1 |
| CMCC-CM | 1971–2000 | 42.5 | 100    | 65   | 57.5   | −0.43 | 0    | 570  | 285  | 10   | 55   | 19 | 2 | ASIA | 22.5 | 0.62 | 22.5 | 0.62 | 1 |
| CMCC-CM | 1971–2000 | 22.5 | 35     | 37.5 | 10     | −0.41 | 377  | 441  | 409  | 15   | 27.5 | 6  | 4 | MED  | 22.5 | 0.62 | 22.5 | 0.62 | 1 |
| CMCC-CM | 1976–2005 | 20   | −175   | 50   | −177.5 | −0.60 | 616  | 1089 | 853  | 2.5  | 97.5 | 39 | 1 | PAC  | 27.5 | 0.61 | 35   | 0.61 | 1 |
| CMCC-CM | 1976–2005 | 17.5 | −42.5  | 42.5 | −57.5  | −0.42 | 1329 | 2820 | 2075 | 12.5 | 42.5 | 13 | 3 | ATL  | 27.5 | 0.61 | 35   | 0.61 | 1 |
| CMCC-CM | 1976–2005 | 42.5 | 97.5   | 62.5 | 57.5   | −0.43 | 205  | 257  | 231  | 10   | 52.5 | 18 | 2 | ASIA | 27.5 | 0.61 | 35   | 0.61 | 1 |

|          |           |      |        |      |        |       |      |      |      |      |      |    |   |      |      |      |      |      |   |
|----------|-----------|------|--------|------|--------|-------|------|------|------|------|------|----|---|------|------|------|------|------|---|
| CMCC-CM  | 1976–2005 | 25   | 27.5   | 40   | 0      | −0.40 | 377  | 707  | 542  | 17.5 | 30   | 6  | 4 | MED  | 27.5 | 0.61 | 35   | 0.61 | 1 |
| CMCC-CMS | 1951–1980 | 17.5 | −170   | 50   | −170   | −0.56 | 1060 | 460  | 760  | 2.5  | 97.5 | 39 | 1 | PAC  | 22.5 | 0.64 | 22.5 | 0.64 | 1 |
| CMCC-CMS | 1951–1980 | 27.5 | −20    | 55   | −22.5  | −0.41 | 1609 | 752  | 1181 | 12.5 | 30   | 8  | 4 | ATL  | 22.5 | 0.64 | 22.5 | 0.64 | 1 |
| CMCC-CMS | 1951–1980 | 40   | 105    | 62.5 | 67.5   | −0.42 | 502  | 128  | 315  | 10   | 42.5 | 14 | 3 | ASIA | 22.5 | 0.64 | 22.5 | 0.64 | 1 |
| CMCC-CMS | 1951–1980 | 25   | 20     | 40   | −7.5   | −0.40 | 812  | 1118 | 965  | 15   | 27.5 | 6  | 5 | MED  | 22.5 | 0.64 | 22.5 | 0.64 | 1 |
| CMCC-CMS | 1956–1985 | 17.5 | −175   | 50   | −172.5 | −0.54 | 530  | 278  | 404  | 2.5  | 97.5 | 39 | 1 | PAC  | 30   | 0.58 | 30   | 0.58 | 1 |
| CMCC-CMS | 1956–1985 | 22.5 | −25    | 52.5 | −22.5  | −0.43 | 1027 | 591  | 809  | 10   | 42.5 | 14 | 2 | ATL  | 30   | 0.58 | 30   | 0.58 | 1 |
| CMCC-CMS | 1956–1985 | 42.5 | 102.5  | 62.5 | 62.5   | −0.40 | 205  | 0    | 102  | 15   | 40   | 11 | 3 | ASIA | 30   | 0.58 | 30   | 0.58 | 1 |
| CMCC-CMS | 1956–1985 | 22.5 | 65     | 45   | 47.5   | −0.36 | 3842 | 3606 | 3724 | 30   | 37.5 | 4  | 5 | MED  | 30   | 0.58 | 30   | 0.58 | 2 |
| CMCC-CMS | 1961–1990 | 17.5 | −175   | 50   | −172.5 | −0.55 | 265  | 333  | 299  | 2.5  | 97.5 | 39 | 1 | PAC  | 30   | 0.57 | 30   | 0.57 | 1 |
| CMCC-CMS | 1961–1990 | 25   | −25    | 52.5 | −25    | −0.45 | 1055 | 328  | 691  | 7.5  | 37.5 | 13 | 2 | ATL  | 30   | 0.57 | 30   | 0.57 | 1 |
| CMCC-CMS | 1961–1990 | 42.5 | 102.5  | 62.5 | 62.5   | −0.37 | 343  | 128  | 236  | 25   | 37.5 | 6  | 3 | ASIA | 30   | 0.57 | 30   | 0.57 | 1 |
| CMCC-CMS | 1961–1990 | 52.5 | 65     | 50   | 12.5   | −0.36 | 3724 | 1129 | 2427 | 27.5 | 32.5 | 3  | 7 | MED  | 30   | 0.57 | 30   | 0.57 | 1 |
| CMCC-CMS | 1966–1995 | 17.5 | −175   | 50   | −172.5 | −0.52 | 265  | 278  | 272  | 2.5  | 97.5 | 39 | 1 | PAC  | 27.5 | 0.57 | 37.5 | 0.58 | 1 |
| CMCC-CMS | 1966–1995 | 22.5 | −32.5  | 50   | −22.5  | −0.46 | 377  | 328  | 352  | 5    | 35   | 13 | 2 | ATL  | 27.5 | 0.57 | 37.5 | 0.58 | 1 |
| CMCC-CMS | 1966–1995 | 42.5 | 100    | 62.5 | 62.5   | −0.39 | 0    | 308  | 154  | 17.5 | 35   | 8  | 3 | ASIA | 27.5 | 0.57 | 37.5 | 0.58 | 1 |
| CMCC-CMS | 1966–1995 | 27.5 | 37.5   | 37.5 | 10     | −0.39 | 373  | 353  | 363  | 17.5 | 27.5 | 5  | 4 | MED  | 27.5 | 0.57 | 37.5 | 0.58 | 1 |
| CMCC-CMS | 1971–2000 | 17.5 | −175   | 50   | −172.5 | −0.54 | 0    | 333  | 166  | 2.5  | 97.5 | 39 | 1 | PAC  | 30   | 0.58 | 30   | 0.58 | 1 |
| CMCC-CMS | 1971–2000 | 22.5 | −10    | 50   | −20    | −0.45 | 2304 | 328  | 1316 | 7.5  | 30   | 10 | 3 | ATL  | 30   | 0.58 | 30   | 0.58 | 1 |
| CMCC-CMS | 1971–2000 | 42.5 | 100    | 62.5 | 60     | −0.39 | 0    | 278  | 139  | 20   | 45   | 11 | 2 | ASIA | 30   | 0.58 | 30   | 0.58 | 1 |
| CMCC-CMS | 1971–2000 | 27.5 | 37.5   | 37.5 | 10     | −0.38 | 278  | 441  | 360  | 20   | 30   | 5  | 4 | MED  | 30   | 0.58 | 30   | 0.58 | 1 |
| CMCC-CMS | 1976–2005 | 20   | −177.5 | 52.5 | −177.5 | −0.58 | 768  | 1236 | 1002 | 2.5  | 97.5 | 39 | 1 | PAC  | 37.5 | 0.56 | 37.5 | 0.56 | 1 |
| CMCC-CMS | 1976–2005 | 22.5 | −10    | 47.5 | −22.5  | −0.45 | 2304 | 556  | 1430 | 10   | 40   | 13 | 2 | ATL  | 37.5 | 0.56 | 37.5 | 0.56 | 1 |
| CMCC-CMS | 1976–2005 | 45   | 97.5   | 62.5 | 52.5   | −0.37 | 343  | 513  | 428  | 27.5 | 47.5 | 9  | 3 | ASIA | 37.5 | 0.56 | 37.5 | 0.56 | 1 |
| CMCC-CMS | 1976–2005 | 30   | 37.5   | 40   | 10     | −0.38 | 1120 | 353  | 736  | 25   | 40   | 7  | 4 | MED  | 37.5 | 0.56 | 37.5 | 0.56 | 1 |
| CNRM-CM5 | 1951–1980 | 17.5 | −175   | 50   | −170   | −0.55 | 530  | 460  | 495  | 2.5  | 97.5 | 39 | 1 | PAC  | 25   | 0.49 | 10   | 0.53 | 1 |
| CNRM-CM5 | 1951–1980 | 20   | −45    | 42.5 | −57.5  | −0.50 | 1073 | 2257 | 1665 | 2.5  | 35   | 14 | 3 | ATL  | 25   | 0.49 | 10   | 0.53 | 1 |
| CNRM-CM5 | 1951–1980 | 50   | 102.5  | 67.5 | 47.5   | −0.41 | 856  | 987  | 922  | 15   | 55   | 17 | 2 | ASIA | 25   | 0.49 | 10   | 0.53 | 1 |
| CNRM-CM5 | 1951–1980 | 25   | 40     | 40   | 17.5   | −0.40 | 1302 | 1118 | 1210 | 20   | 37.5 | 8  | 4 | MED  | 25   | 0.49 | 10   | 0.53 | 1 |
| CNRM-CM5 | 1956–1985 | 17.5 | −175   | 47.5 | −172.5 | −0.58 | 530  | 0    | 265  | 2.5  | 97.5 | 39 | 1 | PAC  | 27.5 | 0.52 | 27.5 | 0.52 | 1 |
| CNRM-CM5 | 1956–1985 | 17.5 | −47.5  | 40   | −57.5  | −0.51 | 1419 | 2412 | 1915 | 5    | 42.5 | 16 | 2 | ATL  | 27.5 | 0.52 | 27.5 | 0.52 | 1 |
| CNRM-CM5 | 1956–1985 | 50   | 102.5  | 67.5 | 47.5   | −0.40 | 856  | 894  | 875  | 20   | 55   | 15 | 3 | ASIA | 27.5 | 0.52 | 27.5 | 0.52 | 1 |

|          |           |      |        |      |        |       |      |      |      |      |      |    |   |      |      |      |      |      |   |
|----------|-----------|------|--------|------|--------|-------|------|------|------|------|------|----|---|------|------|------|------|------|---|
| CNRM-CM5 | 1956–1985 | 25   | 40     | 40   | 17.5   | −0.43 | 1302 | 1118 | 1210 | 15   | 37.5 | 10 | 4 | MED  | 27.5 | 0.52 | 27.5 | 0.52 | 1 |
| CNRM-CM5 | 1961–1990 | 17.5 | −175   | 47.5 | −172.5 | −0.58 | 265  | 188  | 226  | 2.5  | 97.5 | 39 | 1 | PAC  | 35   | 0.61 | 35   | 0.61 | 1 |
| CNRM-CM5 | 1961–1990 | 20   | −47.5  | 45   | −55    | −0.52 | 1324 | 2126 | 1725 | 2.5  | 35   | 14 | 2 | ATL  | 35   | 0.61 | 35   | 0.61 | 1 |
| CNRM-CM5 | 1961–1990 | 45   | 102.5  | 65   | 57.5   | −0.41 | 197  | 304  | 250  | 20   | 52.5 | 14 | 3 | ASIA | 35   | 0.61 | 35   | 0.61 | 1 |
| CNRM-CM5 | 1961–1990 | 25   | 40     | 40   | 17.5   | −0.44 | 571  | 639  | 605  | 12.5 | 42.5 | 13 | 4 | MED  | 35   | 0.61 | 35   | 0.61 | 1 |
| CNRM-CM5 | 1966–1995 | 17.5 | −177.5 | 47.5 | −172.5 | −0.59 | 0    | 0    | 0    | 2.5  | 97.5 | 39 | 1 | PAC  | 30   | 0.57 | 32.5 | 0.58 | 1 |
| CNRM-CM5 | 1966–1995 | 17.5 | −47.5  | 42.5 | −55    | −0.53 | 1539 | 2489 | 2014 | 2.5  | 32.5 | 13 | 2 | ATL  | 30   | 0.57 | 32.5 | 0.58 | 1 |
| CNRM-CM5 | 1966–1995 | 45   | 102.5  | 65   | 60     | −0.39 | 343  | 556  | 449  | 22.5 | 50   | 12 | 3 | ASIA | 30   | 0.57 | 32.5 | 0.58 | 1 |
| CNRM-CM5 | 1966–1995 | 25   | 40     | 40   | 17.5   | −0.45 | 504  | 426  | 465  | 12.5 | 30   | 8  | 4 | MED  | 30   | 0.57 | 32.5 | 0.58 | 1 |
| CNRM-CM5 | 1971–2000 | 17.5 | −175   | 47.5 | −172.5 | −0.61 | 0    | 188  | 94   | 2.5  | 97.5 | 39 | 1 | PAC  | 25   | 0.52 | 42.5 | 0.53 | 1 |
| CNRM-CM5 | 1971–2000 | 20   | −45    | 42.5 | −57.5  | −0.53 | 1398 | 2820 | 2109 | 5    | 30   | 11 | 3 | ATL  | 25   | 0.52 | 42.5 | 0.53 | 1 |
| CNRM-CM5 | 1971–2000 | 47.5 | 102.5  | 67.5 | 52.5   | −0.40 | 590  | 910  | 750  | 22.5 | 52.5 | 13 | 2 | ASIA | 25   | 0.52 | 42.5 | 0.53 | 1 |
| CNRM-CM5 | 1971–2000 | 25   | 40     | 37.5 | 15     | −0.45 | 252  | 0    | 126  | 15   | 35   | 9  | 4 | MED  | 25   | 0.52 | 42.5 | 0.53 | 1 |
| CNRM-CM5 | 1976–2005 | 17.5 | −177.5 | 47.5 | −175   | −0.63 | 602  | 817  | 709  | 2.5  | 97.5 | 39 | 1 | PAC  | 25   | 0.49 | 27.5 | 0.50 | 1 |
| CNRM-CM5 | 1976–2005 | 20   | −47.5  | 45   | −55    | −0.52 | 1637 | 2499 | 2068 | 5    | 25   | 9  | 3 | ATL  | 25   | 0.49 | 27.5 | 0.50 | 1 |
| CNRM-CM5 | 1976–2005 | 45   | 102.5  | 65   | 60     | −0.39 | 343  | 304  | 323  | 25   | 50   | 11 | 2 | ASIA | 25   | 0.49 | 27.5 | 0.50 | 1 |
| CNRM-CM5 | 1976–2005 | 22.5 | 40     | 35   | 17.5   | −0.43 | 1027 | 938  | 983  | 17.5 | 30   | 6  | 4 | MED  | 25   | 0.49 | 27.5 | 0.50 | 1 |
| GFDL-CM3 | 1951–1980 | 17.5 | −147.5 | 47.5 | −150   | −0.61 | 3442 | 1870 | 2656 | 2.5  | 97.5 | 39 | 1 | PAC  | 10   | 0.38 | 25   | 0.43 | 1 |
| GFDL-CM3 | 1951–1980 | 22.5 | −55    | 50   | −72.5  | −0.48 | 2053 | 2996 | 2525 | 7.5  | 10   | 2  | 3 | ATL  | 10   | 0.38 | 25   | 0.43 | 1 |
| GFDL-CM3 | 1951–1980 | 47.5 | 100    | 65   | 55     | −0.45 | 556  | 564  | 560  | 10   | 52.5 | 18 | 2 | ASIA | 10   | 0.38 | 25   | 0.43 | 1 |
| GFDL-CM3 | 1956–1985 | 17.5 | −147.5 | 47.5 | −150   | −0.62 | 3442 | 1684 | 2563 | 2.5  | 97.5 | 39 | 1 | PAC  | 25   | 0.48 | 25   | 0.48 | 1 |
| GFDL-CM3 | 1956–1985 | 22.5 | −55    | 50   | −72.5  | −0.47 | 2053 | 2996 | 2525 | 7.5  | 10   | 2  | 3 | ATL  | 25   | 0.48 | 25   | 0.48 | 3 |
| GFDL-CM3 | 1956–1985 | 47.5 | 100    | 65   | 52.5   | −0.44 | 556  | 564  | 560  | 12.5 | 45   | 14 | 2 | ASIA | 25   | 0.48 | 25   | 0.48 | 1 |
| GFDL-CM3 | 1956–1985 | 27.5 | 40     | 37.5 | 12.5   | −0.33 | 1376 | 661  | 1019 | 45   | 45   | 1  | 5 | MED  | 25   | 0.48 | 25   | 0.48 | 3 |
| GFDL-CM3 | 1961–1990 | 15   | −145   | 45   | −145   | −0.62 | 3476 | 1934 | 2705 | 2.5  | 97.5 | 39 | 1 | PAC  | 40   | 0.51 | 37.5 | 0.52 | 1 |
| GFDL-CM3 | 1961–1990 | 47.5 | 100    | 65   | 52.5   | −0.42 | 278  | 461  | 370  | 15   | 40   | 11 | 2 | ASIA | 40   | 0.51 | 37.5 | 0.52 | 1 |
| GFDL-CM3 | 1961–1990 | 22.5 | 40     | 35   | 17.5   | −0.34 | 750  | 864  | 807  | 40   | 45   | 3  | 3 | MED  | 40   | 0.51 | 37.5 | 0.52 | 1 |
| GFDL-CM3 | 1961–1990 | 25   | 15     | 40   | −12.5  | −0.34 | 5068 | 1615 | 3342 | 40   | 42.5 | 2  | 5 | ATL  | 40   | 0.51 | 37.5 | 0.52 | 2 |
| GFDL-CM3 | 1966–1995 | 15   | −142.5 | 42.5 | −145   | −0.62 | 3742 | 2220 | 2981 | 2.5  | 97.5 | 39 | 1 | PAC  | 30   | 0.55 | 30   | 0.55 | 1 |
| GFDL-CM3 | 1966–1995 | 25   | −52.5  | 52.5 | −60    | −0.46 | 1762 | 2346 | 2054 | 10   | 15   | 3  | 3 | ATL  | 30   | 0.55 | 30   | 0.55 | 3 |
| GFDL-CM3 | 1966–1995 | 47.5 | 100    | 62.5 | 52.5   | −0.39 | 556  | 488  | 522  | 20   | 45   | 11 | 2 | ASIA | 30   | 0.55 | 30   | 0.55 | 1 |
| GFDL-CM3 | 1966–1995 | 42.5 | 45     | 47.5 | 2.5    | −0.35 | 2151 | 1156 | 1653 | 32.5 | 32.5 | 1  | 7 | MED  | 30   | 0.55 | 30   | 0.55 | 3 |



|            |           |      |        |      |        |       |      |      |      |      |      |    |   |      |      |      |      |      |   |
|------------|-----------|------|--------|------|--------|-------|------|------|------|------|------|----|---|------|------|------|------|------|---|
| GFDL-CM3   | 1971–2000 | 15   | −142.5 | 42.5 | −142.5 | −0.61 | 3476 | 2220 | 2848 | 2.5  | 97.5 | 39 | 1 | PAC  | 30   | 0.49 | 30   | 0.49 | 1 |
| GFDL-CM3   | 1971–2000 | 35   | −10    | 62.5 | −10    | −0.32 | 2427 | 1334 | 1881 | 50   | 50   | 1  | 9 | ATL  | 30   | 0.49 | 30   | 0.49 | 3 |
| GFDL-CM3   | 1971–2000 | 47.5 | 100    | 65   | 52.5   | −0.41 | 556  | 675  | 616  | 20   | 52.5 | 14 | 2 | ASIA | 30   | 0.49 | 30   | 0.49 | 1 |
| GFDL-CM3   | 1971–2000 | 40   | 35     | 47.5 | −5     | −0.33 | 1684 | 1972 | 1828 | 42.5 | 42.5 | 1  | 8 | MED  | 30   | 0.49 | 30   | 0.49 | 3 |
| GFDL-CM3   | 1976–2005 | 15   | −142.5 | 42.5 | −145   | −0.63 | 3220 | 1626 | 2423 | 2.5  | 97.5 | 39 | 1 | PAC  | 30   | 0.52 | 30   | 0.52 | 1 |
| GFDL-CM3   | 1976–2005 | 20   | −35    | 47.5 | −32.5  | −0.41 | 612  | 904  | 758  | 17.5 | 17.5 | 1  | 4 | ATL  | 30   | 0.52 | 30   | 0.52 | 3 |
| GFDL-CM3   | 1976–2005 | 47.5 | 102.5  | 67.5 | 55     | −0.39 | 590  | 657  | 623  | 20   | 60   | 17 | 2 | ASIA | 30   | 0.52 | 30   | 0.52 | 1 |
| GFDL-CM3   | 1976–2005 | 27.5 | 22.5   | 42.5 | −7.5   | −0.34 | 938  | 1391 | 1164 | 35   | 35   | 1  | 5 | MED  | 30   | 0.52 | 30   | 0.52 | 3 |
| GFDL-ESM2G | 1951–1980 | 20   | −177.5 | 47.5 | −180   | −0.65 | 383  | 376  | 379  | 2.5  | 97.5 | 39 | 1 | PAC  | 27.5 | 0.49 | 32.5 | 0.50 | 1 |
| GFDL-ESM2G | 1951–1980 | 47.5 | 102.5  | 65   | 55     | −0.42 | 590  | 564  | 577  | 15   | 50   | 15 | 2 | ASIA | 27.5 | 0.49 | 32.5 | 0.50 | 1 |
| GFDL-ESM2G | 1951–1980 | 22.5 | 20     | 35   | −5     | −0.33 | 770  | 938  | 854  | 42.5 | 42.5 | 1  | 7 | MED  | 27.5 | 0.49 | 32.5 | 0.50 | 3 |
| GFDL-ESM2G | 1951–1980 | 17.5 | −50    | 42.5 | −62.5  | −0.44 | 1662 | 2610 | 2136 | 12.5 | 27.5 | 7  | 3 | ATL  | 27.5 | 0.49 | 32.5 | 0.50 | 2 |
| GFDL-ESM2G | 1956–1985 | 17.5 | −180   | 45   | −180   | −0.66 | 0    | 640  | 320  | 2.5  | 97.5 | 39 | 1 | PAC  | 25   | 0.52 | 25   | 0.52 | 1 |
| GFDL-ESM2G | 1956–1985 | 45   | 105    | 67.5 | 65     | −0.47 | 488  | 568  | 528  | 7.5  | 52.5 | 19 | 2 | ASIA | 25   | 0.52 | 25   | 0.52 | 1 |
| GFDL-ESM2G | 1956–1985 | 35   | 37.5   | 50   | 5      | −0.33 | 1695 | 1390 | 1543 | 45   | 52.5 | 4  | 5 | MED  | 25   | 0.52 | 25   | 0.52 | 3 |
| GFDL-ESM2G | 1956–1985 | 17.5 | −50    | 40   | −65    | −0.44 | 1662 | 2935 | 2298 | 12.5 | 25   | 6  | 3 | ATL  | 25   | 0.52 | 25   | 0.52 | 2 |
| GFDL-ESM2G | 1961–1990 | 20   | −180   | 47.5 | −180   | −0.64 | 383  | 751  | 567  | 2.5  | 97.5 | 39 | 1 | PAC  | 30   | 0.54 | 35   | 0.55 | 1 |
| GFDL-ESM2G | 1961–1990 | 45   | 107.5  | 67.5 | 67.5   | −0.48 | 589  | 657  | 623  | 7.5  | 47.5 | 17 | 2 | ASIA | 30   | 0.54 | 35   | 0.55 | 1 |
| GFDL-ESM2G | 1961–1990 | 30   | 37.5   | 45   | 10     | −0.32 | 370  | 556  | 463  | 50   | 52.5 | 2  | 6 | MED  | 30   | 0.54 | 35   | 0.55 | 3 |
| GFDL-ESM2G | 1961–1990 | 17.5 | −52.5  | 40   | −65    | −0.44 | 1910 | 3112 | 2511 | 12.5 | 30   | 8  | 3 | ATL  | 30   | 0.54 | 35   | 0.55 | 2 |
| GFDL-ESM2G | 1966–1995 | 20   | −177.5 | 50   | −177.5 | −0.64 | 278  | 460  | 369  | 2.5  | 97.5 | 39 | 1 | PAC  | 27.5 | 0.49 | 27.5 | 0.49 | 1 |
| GFDL-ESM2G | 1966–1995 | 17.5 | −52.5  | 40   | −65    | −0.43 | 1994 | 3321 | 2657 | 12.5 | 35   | 10 | 3 | ATL  | 27.5 | 0.49 | 27.5 | 0.49 | 1 |
| GFDL-ESM2G | 1966–1995 | 45   | 107.5  | 65   | 67.5   | −0.47 | 663  | 675  | 669  | 7.5  | 42.5 | 15 | 2 | ASIA | 27.5 | 0.49 | 27.5 | 0.49 | 1 |
| GFDL-ESM2G | 1966–1995 | 30   | 40     | 45   | 12.5   | −0.34 | 743  | 556  | 649  | 40   | 55   | 7  | 4 | MED  | 27.5 | 0.49 | 27.5 | 0.49 | 3 |
| GFDL-ESM2G | 1971–2000 | 20   | −177.5 | 50   | −177.5 | −0.65 | 383  | 616  | 499  | 2.5  | 97.5 | 39 | 1 | PAC  | 37.5 | 0.46 | 22.5 | 0.46 | 1 |
| GFDL-ESM2G | 1971–2000 | 45   | 107.5  | 65   | 67.5   | −0.45 | 663  | 675  | 669  | 7.5  | 52.5 | 19 | 2 | ASIA | 37.5 | 0.46 | 22.5 | 0.46 | 1 |
| GFDL-ESM2G | 1971–2000 | 27.5 | 40     | 45   | 17.5   | −0.35 | 373  | 860  | 617  | 37.5 | 50   | 6  | 4 | MED  | 37.5 | 0.46 | 22.5 | 0.46 | 1 |
| GFDL-ESM2G | 1971–2000 | 17.5 | −50    | 40   | −65    | −0.41 | 1994 | 3489 | 2741 | 17.5 | 37.5 | 9  | 3 | ATL  | 37.5 | 0.46 | 22.5 | 0.46 | 2 |
| GFDL-ESM2G | 1976–2005 | 20   | −175   | 50   | −175   | −0.64 | 616  | 933  | 775  | 2.5  | 97.5 | 39 | 1 | PAC  | 35   | 0.53 | 35   | 0.53 | 1 |
| GFDL-ESM2G | 1976–2005 | 45   | 105    | 62.5 | 62.5   | −0.48 | 488  | 0    | 244  | 7.5  | 45   | 16 | 2 | ASIA | 35   | 0.53 | 35   | 0.53 | 1 |
| GFDL-ESM2G | 1976–2005 | 27.5 | 42.5   | 42.5 | 17.5   | −0.35 | 1376 | 1016 | 1196 | 35   | 42.5 | 4  | 4 | MED  | 35   | 0.53 | 35   | 0.53 | 1 |
| GFDL-ESM2G | 1976–2005 | 30   | −45    | 57.5 | −57.5  | −0.43 | 1351 | 2273 | 1812 | 12.5 | 37.5 | 11 | 3 | ATL  | 35   | 0.53 | 35   | 0.53 | 2 |

|            |           |      |        |      |        |       |      |      |      |      |      |    |   |      |      |      |      |      |   |
|------------|-----------|------|--------|------|--------|-------|------|------|------|------|------|----|---|------|------|------|------|------|---|
| GFDL-ESM2M | 1951–1980 | 20   | −172.5 | 52.5 | −172.5 | −0.57 | 837  | 584  | 710  | 2.5  | 97.5 | 39 | 1 | PAC  | 17.5 | 0.48 | 7.5  | 0.55 | 1 |
| GFDL-ESM2M | 1951–1980 | 15   | −50    | 37.5 | −65    | −0.40 | 1784 | 3098 | 2441 | 15   | 57.5 | 18 | 2 | ATL  | 17.5 | 0.48 | 7.5  | 0.55 | 1 |
| GFDL-ESM2M | 1951–1980 | 47.5 | 107.5  | 72.5 | 70     | −0.47 | 810  | 1131 | 970  | 5    | 42.5 | 16 | 3 | ASIA | 17.5 | 0.48 | 7.5  | 0.55 | 1 |
| GFDL-ESM2M | 1951–1980 | 32.5 | 27.5   | 47.5 | −2.5   | −0.39 | 1112 | 1269 | 1191 | 17.5 | 25   | 4  | 5 | MED  | 17.5 | 0.48 | 7.5  | 0.55 | 1 |
| GFDL-ESM2M | 1956–1985 | 17.5 | −177.5 | 47.5 | −172.5 | −0.58 | 265  | 0    | 133  | 2.5  | 97.5 | 39 | 1 | PAC  | 17.5 | 0.58 | 17.5 | 0.58 | 1 |
| GFDL-ESM2M | 1956–1985 | 15   | −50    | 37.5 | −65    | −0.43 | 1784 | 3098 | 2441 | 10   | 47.5 | 16 | 2 | ATL  | 17.5 | 0.58 | 17.5 | 0.58 | 1 |
| GFDL-ESM2M | 1956–1985 | 45   | 107.5  | 70   | 72.5   | −0.43 | 663  | 944  | 803  | 10   | 42.5 | 14 | 3 | ASIA | 17.5 | 0.58 | 17.5 | 0.58 | 1 |
| GFDL-ESM2M | 1956–1985 | 25   | 7.5    | 40   | −20    | −0.39 | 2053 | 2178 | 2115 | 20   | 20   | 1  | 7 | MED  | 17.5 | 0.58 | 17.5 | 0.58 | 3 |
| GFDL-ESM2M | 1961–1990 | 17.5 | −177.5 | 47.5 | −172.5 | −0.59 | 0    | 188  | 94   | 2.5  | 97.5 | 39 | 1 | PAC  | 27.5 | 0.49 | 12.5 | 0.53 | 1 |
| GFDL-ESM2M | 1961–1990 | 45   | 107.5  | 70   | 70     | −0.45 | 589  | 944  | 767  | 7.5  | 42.5 | 15 | 2 | ASIA | 27.5 | 0.49 | 12.5 | 0.53 | 1 |
| GFDL-ESM2M | 1961–1990 | 42.5 | 35     | 57.5 | −2.5   | −0.38 | 1668 | 2143 | 1905 | 27.5 | 42.5 | 7  | 4 | MED  | 27.5 | 0.49 | 12.5 | 0.53 | 1 |
| GFDL-ESM2M | 1961–1990 | 12.5 | −62.5  | 30   | −87.5  | −0.43 | 3114 | 5404 | 4259 | 10   | 42.5 | 14 | 3 | ATL  | 27.5 | 0.49 | 12.5 | 0.53 | 2 |
| GFDL-ESM2M | 1966–1995 | 17.5 | −177.5 | 47.5 | −172.5 | −0.62 | 0    | 0    | 0    | 2.5  | 97.5 | 39 | 1 | PAC  | 25   | 0.57 | 25   | 0.57 | 1 |
| GFDL-ESM2M | 1966–1995 | 17.5 | −50    | 37.5 | −67.5  | −0.41 | 1762 | 3665 | 2714 | 15   | 40   | 11 | 2 | ATL  | 25   | 0.57 | 25   | 0.57 | 1 |
| GFDL-ESM2M | 1966–1995 | 45   | 105    | 67.5 | 65     | −0.46 | 488  | 869  | 679  | 7.5  | 30   | 10 | 3 | ASIA | 25   | 0.57 | 25   | 0.57 | 1 |
| GFDL-ESM2M | 1966–1995 | 32.5 | 32.5   | 47.5 | 2.5    | −0.38 | 869  | 1156 | 1012 | 25   | 35   | 5  | 4 | MED  | 25   | 0.57 | 25   | 0.57 | 1 |
| GFDL-ESM2M | 1971–2000 | 17.5 | −177.5 | 47.5 | −175   | −0.63 | 265  | 376  | 320  | 2.5  | 97.5 | 39 | 1 | PAC  | 27.5 | 0.51 | 15   | 0.61 | 1 |
| GFDL-ESM2M | 1971–2000 | 17.5 | −42.5  | 40   | −57.5  | −0.41 | 1329 | 2989 | 2159 | 12.5 | 32.5 | 9  | 3 | ATL  | 27.5 | 0.51 | 15   | 0.61 | 1 |
| GFDL-ESM2M | 1971–2000 | 45   | 102.5  | 65   | 60     | −0.48 | 343  | 556  | 449  | 7.5  | 60   | 22 | 2 | ASIA | 27.5 | 0.51 | 15   | 0.61 | 1 |
| GFDL-ESM2M | 1971–2000 | 27.5 | 25     | 42.5 | −2.5   | −0.37 | 1277 | 1587 | 1432 | 27.5 | 37.5 | 5  | 4 | MED  | 27.5 | 0.51 | 15   | 0.61 | 2 |
| GFDL-ESM2M | 1976–2005 | 17.5 | −175   | 47.5 | −172.5 | −0.63 | 385  | 640  | 513  | 2.5  | 97.5 | 39 | 1 | PAC  | 25   | 0.57 | 17.5 | 0.62 | 1 |
| GFDL-ESM2M | 1976–2005 | 17.5 | −42.5  | 42.5 | −52.5  | −0.43 | 1329 | 2489 | 1909 | 12.5 | 32.5 | 9  | 3 | ATL  | 25   | 0.57 | 17.5 | 0.62 | 1 |
| GFDL-ESM2M | 1976–2005 | 42.5 | 102.5  | 62.5 | 60     | −0.49 | 205  | 128  | 167  | 7.5  | 50   | 18 | 2 | ASIA | 25   | 0.57 | 17.5 | 0.62 | 1 |
| GFDL-ESM2M | 1976–2005 | 22.5 | 20     | 37.5 | −5     | −0.38 | 1027 | 1102 | 1065 | 25   | 30   | 3  | 4 | MED  | 25   | 0.57 | 17.5 | 0.62 | 1 |
| HadGEM2-AO | 1951–1980 | 20   | −160   | 47.5 | −162.5 | −0.65 | 2123 | 938  | 1530 | 2.5  | 97.5 | 39 | 1 | PAC  | 25   | 0.32 | 25   | 0.32 | 1 |
| HadGEM2-AO | 1951–1980 | 37.5 | 102.5  | 65   | 35     | −0.53 | 595  | 1486 | 1041 | 5    | 27.5 | 10 | 3 | ASIA | 25   | 0.32 | 25   | 0.32 | 1 |
| HadGEM2-AO | 1951–1980 | 37.5 | 12.5   | 62.5 | −15    | −0.54 | 2200 | 3096 | 2648 | 2.5  | 17.5 | 7  | 7 | MED  | 25   | 0.32 | 25   | 0.32 | 3 |
| HadGEM2-AO | 1951–1980 | 22.5 | −50    | 45   | −70    | −0.47 | 1540 | 3018 | 2279 | 12.5 | 32.5 | 9  | 5 | ATL  | 25   | 0.32 | 25   | 0.32 | 2 |
| HadGEM2-AO | 1956–1985 | 20   | −160   | 50   | −160   | −0.66 | 2123 | 956  | 1540 | 2.5  | 97.5 | 39 | 1 | PAC  | 20   | 0.34 | 10   | 0.39 | 1 |
| HadGEM2-AO | 1956–1985 | 27.5 | −2.5   | 42.5 | −30    | −0.46 | 3312 | 834  | 2073 | 20   | 47.5 | 12 | 3 | ATL  | 20   | 0.34 | 10   | 0.39 | 1 |
| HadGEM2-AO | 1956–1985 | 45   | 105    | 67.5 | 67.5   | −0.58 | 488  | 603  | 546  | 2.5  | 35   | 14 | 2 | ASIA | 20   | 0.34 | 10   | 0.39 | 1 |
| HadGEM2-AO | 1956–1985 | 25   | 37.5   | 37.5 | 12.5   | −0.54 | 1055 | 661  | 858  | 5    | 12.5 | 4  | 8 | MED  | 20   | 0.34 | 10   | 0.39 | 3 |

|            |           |      |        |      |        |       |      |      |      |      |      |    |   |      |      |      |      |      |   |
|------------|-----------|------|--------|------|--------|-------|------|------|------|------|------|----|---|------|------|------|------|------|---|
| HadGEM2-AO | 1961–1990 | 17.5 | −160   | 45   | −152.5 | −0.72 | 1855 | 1371 | 1613 | 2.5  | 97.5 | 39 | 1 | PAC  | 22.5 | 0.43 | 22.5 | 0.43 | 1 |
| HadGEM2-AO | 1961–1990 | 47.5 | 105    | 70   | 65     | −0.57 | 474  | 863  | 669  | 5    | 27.5 | 10 | 5 | ASIA | 22.5 | 0.43 | 22.5 | 0.43 | 1 |
| HadGEM2-AO | 1961–1990 | 22.5 | 37.5   | 37.5 | 15     | −0.47 | 610  | 515  | 563  | 20   | 37.5 | 8  | 6 | MED  | 22.5 | 0.43 | 22.5 | 0.43 | 1 |
| HadGEM2-AO | 1961–1990 | 45   | 5      | 75   | −7.5   | −0.48 | 4398 | 2927 | 3663 | 17.5 | 45   | 12 | 3 | ATL  | 22.5 | 0.43 | 22.5 | 0.43 | 2 |
| HadGEM2-AO | 1966–1995 | 17.5 | −157.5 | 45   | −152.5 | −0.69 | 2120 | 1558 | 1839 | 2.5  | 97.5 | 39 | 1 | PAC  | 20   | 0.39 | 20   | 0.39 | 1 |
| HadGEM2-AO | 1966–1995 | 25   | −47.5  | 52.5 | −37.5  | −0.58 | 1259 | 845  | 1052 | 7.5  | 20   | 6  | 7 | ATL  | 20   | 0.39 | 20   | 0.39 | 1 |
| HadGEM2-AO | 1966–1995 | 45   | 110    | 67.5 | 65     | −0.64 | 849  | 869  | 859  | 2.5  | 40   | 15 | 2 | ASIA | 20   | 0.39 | 20   | 0.39 | 1 |
| HadGEM2-AO | 1966–1995 | 27.5 | 40     | 37.5 | 15     | −0.55 | 571  | 353  | 462  | 10   | 35   | 11 | 3 | MED  | 20   | 0.39 | 20   | 0.39 | 1 |
| HadGEM2-AO | 1971–2000 | 17.5 | −180   | 50   | −170   | −0.67 | 530  | 278  | 404  | 2.5  | 97.5 | 39 | 1 | PAC  | 32.5 | 0.43 | 32.5 | 0.43 | 1 |
| HadGEM2-AO | 1971–2000 | 25   | −47.5  | 52.5 | −37.5  | −0.61 | 1511 | 1014 | 1262 | 2.5  | 45   | 18 | 3 | ATL  | 32.5 | 0.43 | 32.5 | 0.43 | 1 |
| HadGEM2-AO | 1971–2000 | 47.5 | 110    | 75   | 67.5   | −0.64 | 962  | 1695 | 1328 | 2.5  | 47.5 | 19 | 2 | ASIA | 32.5 | 0.43 | 32.5 | 0.43 | 1 |
| HadGEM2-AO | 1971–2000 | 25   | 40     | 37.5 | 15     | −0.50 | 252  | 0    | 126  | 20   | 45   | 11 | 5 | MED  | 32.5 | 0.43 | 32.5 | 0.43 | 1 |
| HadGEM2-AO | 1976–2005 | 17.5 | −157.5 | 47.5 | −152.5 | −0.72 | 1625 | 999  | 1312 | 2.5  | 97.5 | 39 | 1 | PAC  | 15   | 0.54 | 15   | 0.54 | 1 |
| HadGEM2-AO | 1976–2005 | 27.5 | −37.5  | 55   | −35    | −0.64 | 571  | 866  | 719  | 2.5  | 25   | 10 | 3 | ATL  | 15   | 0.54 | 15   | 0.54 | 1 |
| HadGEM2-AO | 1976–2005 | 45   | 110    | 65   | 62.5   | −0.67 | 849  | 278  | 564  | 2.5  | 32.5 | 13 | 2 | ASIA | 15   | 0.54 | 15   | 0.54 | 1 |
| HadGEM2-AO | 1976–2005 | 22.5 | 37.5   | 37.5 | 15     | −0.51 | 770  | 661  | 716  | 15   | 22.5 | 4  | 7 | MED  | 15   | 0.54 | 15   | 0.54 | 1 |
| HadGEM2-CC | 1951–1980 | 17.5 | −175   | 45   | −172.5 | −0.60 | 530  | 338  | 434  | 2.5  | 97.5 | 39 | 1 | PAC  | 22.5 | 0.63 | 22.5 | 0.63 | 1 |
| HadGEM2-CC | 1951–1980 | 20   | −50    | 47.5 | −52.5  | −0.49 | 1578 | 1666 | 1622 | 7.5  | 42.5 | 15 | 3 | ATL  | 22.5 | 0.63 | 22.5 | 0.63 | 1 |
| HadGEM2-CC | 1951–1980 | 45   | 102.5  | 65   | 62.5   | −0.52 | 343  | 304  | 323  | 5    | 52.5 | 20 | 2 | ASIA | 22.5 | 0.63 | 22.5 | 0.63 | 1 |
| HadGEM2-CC | 1951–1980 | 22.5 | 25     | 35   | 0      | −0.44 | 257  | 527  | 392  | 12.5 | 35   | 10 | 4 | MED  | 22.5 | 0.63 | 22.5 | 0.63 | 1 |
| HadGEM2-CC | 1956–1985 | 17.5 | −175   | 45   | −172.5 | −0.58 | 530  | 278  | 404  | 2.5  | 97.5 | 39 | 1 | PAC  | 25   | 0.60 | 25   | 0.60 | 1 |
| HadGEM2-CC | 1956–1985 | 20   | −52.5  | 47.5 | −55    | −0.48 | 1834 | 1845 | 1839 | 7.5  | 42.5 | 15 | 3 | ATL  | 25   | 0.60 | 25   | 0.60 | 1 |
| HadGEM2-CC | 1956–1985 | 45   | 105    | 65   | 65     | −0.53 | 488  | 304  | 396  | 2.5  | 50   | 20 | 2 | ASIA | 25   | 0.60 | 25   | 0.60 | 1 |
| HadGEM2-CC | 1956–1985 | 22.5 | 22.5   | 35   | −2.5   | −0.44 | 514  | 727  | 621  | 12.5 | 30   | 8  | 4 | MED  | 25   | 0.60 | 25   | 0.60 | 2 |
| HadGEM2-CC | 1961–1990 | 15   | −175   | 45   | −170   | −0.60 | 385  | 278  | 332  | 2.5  | 97.5 | 39 | 1 | PAC  | 35   | 0.65 | 40   | 0.65 | 1 |
| HadGEM2-CC | 1961–1990 | 17.5 | −52.5  | 42.5 | −55    | −0.50 | 1910 | 2257 | 2083 | 7.5  | 45   | 16 | 3 | ATL  | 35   | 0.65 | 40   | 0.65 | 1 |
| HadGEM2-CC | 1961–1990 | 45   | 107.5  | 67.5 | 70     | −0.53 | 589  | 726  | 658  | 5    | 60   | 23 | 2 | ASIA | 35   | 0.65 | 40   | 0.65 | 1 |
| HadGEM2-CC | 1961–1990 | 22.5 | 22.5   | 35   | −2.5   | −0.45 | 1376 | 1233 | 1305 | 12.5 | 35   | 10 | 4 | MED  | 35   | 0.65 | 40   | 0.65 | 1 |
| HadGEM2-CC | 1966–1995 | 15   | −177.5 | 45   | −172.5 | −0.58 | 278  | 278  | 278  | 2.5  | 97.5 | 39 | 1 | PAC  | 32.5 | 0.65 | 32.5 | 0.65 | 1 |
| HadGEM2-CC | 1966–1995 | 45   | 107.5  | 67.5 | 70     | −0.51 | 663  | 966  | 814  | 5    | 55   | 21 | 2 | ASIA | 32.5 | 0.65 | 32.5 | 0.65 | 1 |
| HadGEM2-CC | 1966–1995 | 22.5 | 25     | 35   | 0      | −0.43 | 1055 | 1233 | 1144 | 15   | 37.5 | 10 | 4 | MED  | 32.5 | 0.65 | 32.5 | 0.65 | 1 |
| HadGEM2-CC | 1966–1995 | 17.5 | −52.5  | 42.5 | −55    | −0.50 | 1994 | 2489 | 2241 | 5    | 50   | 19 | 3 | ATL  | 32.5 | 0.65 | 32.5 | 0.65 | 2 |

|              |           |      |        |      |        |       |      |      |      |      |      |    |   |      |      |      |      |      |   |
|--------------|-----------|------|--------|------|--------|-------|------|------|------|------|------|----|---|------|------|------|------|------|---|
| HadGEM2-CC   | 1971–2000 | 15   | −177.5 | 45   | −172.5 | −0.60 | 385  | 338  | 362  | 2.5  | 97.5 | 39 | 1 | PAC  | 32.5 | 0.60 | 40   | 0.61 | 1 |
| HadGEM2-CC   | 1971–2000 | 45   | 105    | 67.5 | 67.5   | −0.52 | 488  | 910  | 699  | 5    | 57.5 | 22 | 2 | ASIA | 32.5 | 0.60 | 40   | 0.61 | 1 |
| HadGEM2-CC   | 1971–2000 | 20   | 55     | 30   | 30     | −0.44 | 1880 | 1615 | 1748 | 12.5 | 32.5 | 9  | 4 | MED  | 32.5 | 0.60 | 40   | 0.61 | 1 |
| HadGEM2-CC   | 1971–2000 | 22.5 | −55    | 50   | −57.5  | −0.49 | 2304 | 2428 | 2366 | 7.5  | 45   | 16 | 3 | ATL  | 32.5 | 0.60 | 40   | 0.61 | 2 |
| HadGEM2-CC   | 1976–2005 | 15   | −177.5 | 45   | −172.5 | −0.60 | 537  | 589  | 563  | 2.5  | 97.5 | 39 | 1 | PAC  | 25   | 0.60 | 32.5 | 0.63 | 1 |
| HadGEM2-CC   | 1976–2005 | 45   | 102.5  | 65   | 62.5   | −0.54 | 343  | 278  | 310  | 5    | 55   | 21 | 2 | ASIA | 25   | 0.60 | 32.5 | 0.63 | 1 |
| HadGEM2-CC   | 1976–2005 | 22.5 | 27.5   | 35   | 2.5    | −0.45 | 257  | 527  | 392  | 12.5 | 27.5 | 7  | 4 | MED  | 25   | 0.60 | 32.5 | 0.63 | 1 |
| HadGEM2-CC   | 1976–2005 | 17.5 | −55    | 42.5 | −57.5  | −0.52 | 2472 | 2820 | 2646 | 5    | 42.5 | 16 | 3 | ATL  | 25   | 0.60 | 32.5 | 0.63 | 2 |
| IPSL-CM5A-MR | 1951–1980 | 17.5 | −172.5 | 52.5 | −170   | −0.66 | 795  | 661  | 728  | 2.5  | 97.5 | 39 | 1 | PAC  | 30   | 0.47 | 35   | 0.47 | 1 |
| IPSL-CM5A-MR | 1951–1980 | 17.5 | −37.5  | 45   | −45    | −0.51 | 614  | 1253 | 934  | 7.5  | 40   | 14 | 2 | ATL  | 30   | 0.47 | 35   | 0.47 | 1 |
| IPSL-CM5A-MR | 1951–1980 | 42.5 | 102.5  | 67.5 | 60     | −0.41 | 205  | 603  | 404  | 22.5 | 42.5 | 9  | 3 | ASIA | 30   | 0.47 | 35   | 0.47 | 1 |
| IPSL-CM5A-MR | 1951–1980 | 20   | 62.5   | 45   | 50     | −0.42 | 3630 | 3802 | 3716 | 20   | 32.5 | 6  | 4 | MED  | 30   | 0.47 | 35   | 0.47 | 2 |
| IPSL-CM5A-MR | 1956–1985 | 17.5 | −170   | 50   | −170   | −0.65 | 1060 | 333  | 697  | 2.5  | 97.5 | 39 | 1 | PAC  | 27.5 | 0.50 | 27.5 | 0.50 | 1 |
| IPSL-CM5A-MR | 1956–1985 | 17.5 | −37.5  | 47.5 | −40    | −0.51 | 614  | 783  | 699  | 7.5  | 35   | 12 | 2 | ATL  | 27.5 | 0.50 | 27.5 | 0.50 | 1 |
| IPSL-CM5A-MR | 1956–1985 | 45   | 107.5  | 75   | 72.5   | −0.41 | 663  | 1442 | 1053 | 20   | 35   | 7  | 3 | ASIA | 27.5 | 0.50 | 27.5 | 0.50 | 1 |
| IPSL-CM5A-MR | 1956–1985 | 20   | 62.5   | 47.5 | 52.5   | −0.40 | 3630 | 3982 | 3806 | 27.5 | 32.5 | 3  | 5 | MED  | 27.5 | 0.50 | 27.5 | 0.50 | 2 |
| IPSL-CM5A-MR | 1961–1990 | 17.5 | −170   | 52.5 | −170   | −0.66 | 795  | 556  | 676  | 2.5  | 97.5 | 39 | 1 | PAC  | 25   | 0.53 | 32.5 | 0.55 | 1 |
| IPSL-CM5A-MR | 1961–1990 | 20   | −40    | 50   | −37.5  | −0.49 | 588  | 714  | 651  | 7.5  | 37.5 | 13 | 2 | ATL  | 25   | 0.53 | 32.5 | 0.55 | 1 |
| IPSL-CM5A-MR | 1961–1990 | 42.5 | 102.5  | 70   | 62.5   | −0.42 | 343  | 841  | 592  | 17.5 | 32.5 | 7  | 3 | ASIA | 25   | 0.53 | 32.5 | 0.55 | 1 |
| IPSL-CM5A-MR | 1961–1990 | 17.5 | 62.5   | 52.5 | 57.5   | −0.42 | 3027 | 3826 | 3427 | 20   | 25   | 3  | 4 | MED  | 25   | 0.53 | 32.5 | 0.55 | 2 |
| IPSL-CM5A-MR | 1966–1995 | 20   | −172.5 | 52.5 | −177.5 | −0.68 | 595  | 661  | 628  | 2.5  | 97.5 | 39 | 1 | PAC  | 20   | 0.46 | 40   | 0.55 | 1 |
| IPSL-CM5A-MR | 1966–1995 | 20   | −42.5  | 50   | −45    | −0.48 | 950  | 1415 | 1182 | 10   | 30   | 9  | 2 | ATL  | 20   | 0.46 | 40   | 0.55 | 1 |
| IPSL-CM5A-MR | 1966–1995 | 42.5 | 105    | 72.5 | 72.5   | −0.44 | 410  | 1491 | 951  | 15   | 35   | 9  | 3 | ASIA | 20   | 0.46 | 40   | 0.55 | 1 |
| IPSL-CM5A-MR | 1966–1995 | 22.5 | 17.5   | 40   | −10    | −0.45 | 1801 | 1911 | 1856 | 15   | 20   | 3  | 5 | MED  | 20   | 0.46 | 40   | 0.55 | 1 |
| IPSL-CM5A-MR | 1971–2000 | 20   | −172.5 | 52.5 | −177.5 | −0.68 | 383  | 772  | 577  | 2.5  | 97.5 | 39 | 1 | PAC  | 25   | 0.55 | 32.5 | 0.55 | 1 |
| IPSL-CM5A-MR | 1971–2000 | 20   | −42.5  | 50   | −42.5  | −0.49 | 1168 | 1415 | 1291 | 10   | 40   | 13 | 2 | ATL  | 25   | 0.55 | 32.5 | 0.55 | 1 |
| IPSL-CM5A-MR | 1971–2000 | 42.5 | 97.5   | 62.5 | 55     | −0.45 | 205  | 386  | 295  | 15   | 40   | 11 | 3 | ASIA | 25   | 0.55 | 32.5 | 0.55 | 1 |
| IPSL-CM5A-MR | 1971–2000 | 22.5 | 17.5   | 40   | −10    | −0.44 | 2053 | 2178 | 2115 | 17.5 | 25   | 4  | 4 | MED  | 25   | 0.55 | 32.5 | 0.55 | 1 |
| IPSL-CM5A-MR | 1976–2005 | 20   | −172.5 | 55   | −175   | −0.67 | 556  | 1319 | 937  | 2.5  | 97.5 | 39 | 1 | PAC  | 22.5 | 0.52 | 27.5 | 0.54 | 1 |
| IPSL-CM5A-MR | 1976–2005 | 20   | −42.5  | 50   | −47.5  | −0.46 | 1168 | 1753 | 1460 | 12.5 | 37.5 | 11 | 2 | ATL  | 22.5 | 0.52 | 27.5 | 0.54 | 1 |
| IPSL-CM5A-MR | 1976–2005 | 42.5 | 102.5  | 70   | 67.5   | −0.45 | 205  | 863  | 534  | 15   | 40   | 11 | 3 | ASIA | 22.5 | 0.52 | 27.5 | 0.54 | 1 |
| IPSL-CM5A-MR | 1976–2005 | 25   | 22.5   | 42.5 | −5     | −0.44 | 812  | 1199 | 1006 | 15   | 22.5 | 4  | 4 | MED  | 22.5 | 0.52 | 27.5 | 0.54 | 1 |

|            |           |      |        |      |        |       |      |      |      |      |      |    |   |      |      |      |      |      |   |
|------------|-----------|------|--------|------|--------|-------|------|------|------|------|------|----|---|------|------|------|------|------|---|
| MIROC5     | 1951–1980 | 15   | −150   | 42.5 | −150   | −0.65 | 3211 | 2033 | 2622 | 2.5  | 97.5 | 39 | 1 | PAC  | 30   | 0.38 | 47.5 | 0.39 | 1 |
| MIROC5     | 1951–1980 | 20   | −32.5  | 45   | −40    | −0.52 | 380  | 933  | 657  | 7.5  | 42.5 | 15 | 2 | ATL  | 30   | 0.38 | 47.5 | 0.39 | 1 |
| MIROC5     | 1951–1980 | 45   | 102.5  | 65   | 62.5   | −0.44 | 343  | 304  | 323  | 20   | 55   | 15 | 3 | ASIA | 30   | 0.38 | 47.5 | 0.39 | 1 |
| MIROC5     | 1951–1980 | 27.5 | 7.5    | 40   | −20    | −0.42 | 2088 | 2178 | 2133 | 27.5 | 30   | 2  | 5 | MED  | 30   | 0.38 | 47.5 | 0.39 | 1 |
| MIROC5     | 1956–1985 | 17.5 | −150   | 45   | −152.5 | −0.64 | 3178 | 1558 | 2368 | 2.5  | 97.5 | 39 | 1 | PAC  | 22.5 | 0.55 | 22.5 | 0.55 | 1 |
| MIROC5     | 1956–1985 | 20   | −32.5  | 45   | −40    | −0.51 | 380  | 933  | 657  | 5    | 42.5 | 16 | 3 | ATL  | 22.5 | 0.55 | 22.5 | 0.55 | 1 |
| MIROC5     | 1956–1985 | 42.5 | 100    | 65   | 65     | −0.46 | 0    | 304  | 152  | 12.5 | 60   | 20 | 2 | ASIA | 22.5 | 0.55 | 22.5 | 0.55 | 1 |
| MIROC5     | 1956–1985 | 25   | 15     | 37.5 | −12.5  | −0.42 | 1302 | 1542 | 1422 | 22.5 | 27.5 | 3  | 5 | MED  | 22.5 | 0.55 | 22.5 | 0.55 | 1 |
| MIROC5     | 1961–1990 | 17.5 | −152.5 | 47.5 | −155   | −0.65 | 2649 | 1125 | 1887 | 2.5  | 97.5 | 39 | 1 | PAC  | 20   | 0.51 | 27.5 | 0.54 | 1 |
| MIROC5     | 1961–1990 | 20   | −35    | 45   | −42.5  | −0.50 | 278  | 1253 | 766  | 7.5  | 47.5 | 17 | 2 | ATL  | 20   | 0.51 | 27.5 | 0.54 | 1 |
| MIROC5     | 1961–1990 | 42.5 | 100    | 65   | 62.5   | −0.42 | 278  | 304  | 291  | 20   | 52.5 | 14 | 3 | ASIA | 20   | 0.51 | 27.5 | 0.54 | 1 |
| MIROC5     | 1961–1990 | 27.5 | 25     | 40   | −2.5   | −0.42 | 986  | 1064 | 1025 | 20   | 25   | 3  | 5 | MED  | 20   | 0.51 | 27.5 | 0.54 | 1 |
| MIROC5     | 1966–1995 | 15   | −155   | 45   | −155   | −0.66 | 2417 | 1371 | 1894 | 2.5  | 97.5 | 39 | 1 | PAC  | 20   | 0.54 | 20   | 0.54 | 1 |
| MIROC5     | 1966–1995 | 20   | −35    | 45   | −42.5  | −0.52 | 556  | 1524 | 1040 | 7.5  | 35   | 12 | 3 | ATL  | 20   | 0.54 | 20   | 0.54 | 1 |
| MIROC5     | 1966–1995 | 42.5 | 102.5  | 65   | 65     | −0.44 | 205  | 612  | 408  | 17.5 | 52.5 | 15 | 2 | ASIA | 20   | 0.54 | 20   | 0.54 | 1 |
| MIROC5     | 1966–1995 | 27.5 | 27.5   | 40   | 0      | −0.43 | 798  | 1064 | 931  | 17.5 | 37.5 | 9  | 4 | MED  | 20   | 0.54 | 20   | 0.54 | 1 |
| MIROC5     | 1971–2000 | 15   | −157.5 | 45   | −157.5 | −0.68 | 1888 | 999  | 1444 | 2.5  | 97.5 | 39 | 1 | PAC  | 20   | 0.53 | 20   | 0.53 | 1 |
| MIROC5     | 1971–2000 | 17.5 | −32.5  | 42.5 | −40    | −0.51 | 834  | 1714 | 1274 | 7.5  | 40   | 14 | 2 | ATL  | 20   | 0.53 | 20   | 0.53 | 1 |
| MIROC5     | 1971–2000 | 42.5 | 102.5  | 67.5 | 67.5   | −0.43 | 205  | 910  | 558  | 20   | 50   | 13 | 3 | ASIA | 20   | 0.53 | 20   | 0.53 | 1 |
| MIROC5     | 1971–2000 | 27.5 | 27.5   | 40   | 0      | −0.46 | 1035 | 1328 | 1182 | 12.5 | 37.5 | 11 | 4 | MED  | 20   | 0.53 | 20   | 0.53 | 1 |
| MIROC5     | 1976–2005 | 15   | −160   | 45   | −160   | −0.69 | 1342 | 393  | 868  | 2.5  | 97.5 | 39 | 1 | PAC  | 25   | 0.53 | 15   | 0.54 | 1 |
| MIROC5     | 1976–2005 | 47.5 | 107.5  | 75   | 77.5   | −0.42 | 810  | 1505 | 1157 | 25   | 55   | 13 | 2 | ASIA | 25   | 0.53 | 15   | 0.54 | 1 |
| MIROC5     | 1976–2005 | 27.5 | 27.5   | 40   | 0      | −0.45 | 610  | 707  | 659  | 15   | 40   | 11 | 3 | MED  | 25   | 0.53 | 15   | 0.54 | 1 |
| MIROC5     | 1976–2005 | 17.5 | −42.5  | 37.5 | −60    | −0.53 | 1329 | 3335 | 2332 | 7.5  | 25   | 8  | 4 | ATL  | 25   | 0.53 | 15   | 0.54 | 2 |
| MPI-ESM-LR | 1951–1980 | 17.5 | −177.5 | 47.5 | −177.5 | −0.59 | 265  | 188  | 226  | 2.5  | 97.5 | 39 | 1 | PAC  | 25   | 0.59 | 25   | 0.59 | 1 |
| MPI-ESM-LR | 1951–1980 | 42.5 | 100    | 65   | 57.5   | −0.42 | 0    | 461  | 231  | 12.5 | 45   | 14 | 2 | ASIA | 25   | 0.59 | 25   | 0.59 | 1 |
| MPI-ESM-LR | 1951–1980 | 27.5 | 32.5   | 40   | 5      | −0.42 | 750  | 278  | 514  | 10   | 35   | 11 | 3 | MED  | 25   | 0.59 | 25   | 0.59 | 1 |
| MPI-ESM-LR | 1951–1980 | 27.5 | −17.5  | 57.5 | −12.5  | −0.39 | 1847 | 1414 | 1631 | 17.5 | 30   | 6  | 4 | ATL  | 25   | 0.59 | 25   | 0.59 | 2 |
| MPI-ESM-LR | 1956–1985 | 17.5 | −177.5 | 47.5 | −175   | −0.62 | 265  | 188  | 226  | 2.5  | 97.5 | 39 | 1 | PAC  | 22.5 | 0.63 | 22.5 | 0.63 | 1 |
| MPI-ESM-LR | 1956–1985 | 27.5 | −20    | 55   | −15    | −0.38 | 1609 | 1154 | 1382 | 17.5 | 30   | 6  | 4 | ATL  | 22.5 | 0.63 | 22.5 | 0.63 | 1 |
| MPI-ESM-LR | 1956–1985 | 45   | 102.5  | 65   | 57.5   | −0.43 | 343  | 371  | 357  | 10   | 47.5 | 16 | 2 | ASIA | 22.5 | 0.63 | 22.5 | 0.63 | 1 |
| MPI-ESM-LR | 1956–1985 | 27.5 | 32.5   | 40   | 5      | −0.41 | 750  | 278  | 514  | 12.5 | 32.5 | 9  | 3 | MED  | 22.5 | 0.63 | 22.5 | 0.63 | 1 |

|            |           |      |        |      |        |       |      |      |      |      |      |    |   |      |      |      |      |      |   |
|------------|-----------|------|--------|------|--------|-------|------|------|------|------|------|----|---|------|------|------|------|------|---|
| MPI-ESM-LR | 1961–1990 | 17.5 | −177.5 | 47.5 | −175   | −0.63 | 0    | 376  | 188  | 2.5  | 97.5 | 39 | 1 | PAC  | 35   | 0.60 | 37.5 | 0.60 | 1 |
| MPI-ESM-LR | 1961–1990 | 25   | −22.5  | 55   | −17.5  | −0.39 | 1302 | 875  | 1088 | 15   | 35   | 9  | 4 | ATL  | 35   | 0.60 | 37.5 | 0.60 | 1 |
| MPI-ESM-LR | 1961–1990 | 45   | 102.5  | 65   | 57.5   | −0.41 | 197  | 304  | 250  | 12.5 | 42.5 | 13 | 2 | ASIA | 35   | 0.60 | 37.5 | 0.60 | 1 |
| MPI-ESM-LR | 1961–1990 | 27.5 | 35     | 40   | 7.5    | −0.39 | 0    | 213  | 106  | 15   | 35   | 9  | 3 | MED  | 35   | 0.60 | 37.5 | 0.60 | 1 |
| MPI-ESM-LR | 1966–1995 | 17.5 | −177.5 | 47.5 | −175   | −0.62 | 0    | 188  | 94   | 2.5  | 97.5 | 39 | 1 | PAC  | 27.5 | 0.60 | 27.5 | 0.60 | 1 |
| MPI-ESM-LR | 1966–1995 | 25   | −32.5  | 52.5 | −20    | −0.39 | 252  | 338  | 295  | 15   | 35   | 9  | 3 | ATL  | 27.5 | 0.60 | 27.5 | 0.60 | 1 |
| MPI-ESM-LR | 1966–1995 | 45   | 105    | 67.5 | 60     | −0.40 | 488  | 834  | 661  | 12.5 | 45   | 14 | 2 | ASIA | 27.5 | 0.60 | 27.5 | 0.60 | 1 |
| MPI-ESM-LR | 1966–1995 | 27.5 | 35     | 40   | 7.5    | −0.36 | 278  | 426  | 352  | 22.5 | 32.5 | 5  | 4 | MED  | 27.5 | 0.60 | 27.5 | 0.60 | 1 |
| MPI-ESM-LR | 1971–2000 | 17.5 | −180   | 47.5 | −177.5 | −0.60 | 530  | 563  | 547  | 2.5  | 97.5 | 39 | 1 | PAC  | 20   | 0.52 | 35   | 0.57 | 1 |
| MPI-ESM-LR | 1971–2000 | 27.5 | −30    | 57.5 | −20    | −0.37 | 373  | 578  | 476  | 17.5 | 42.5 | 11 | 3 | ATL  | 20   | 0.52 | 35   | 0.57 | 1 |
| MPI-ESM-LR | 1971–2000 | 45   | 102.5  | 65   | 57.5   | −0.40 | 343  | 570  | 457  | 12.5 | 55   | 18 | 2 | ASIA | 20   | 0.52 | 35   | 0.57 | 1 |
| MPI-ESM-LR | 1971–2000 | 27.5 | 27.5   | 42.5 | 0      | −0.37 | 1035 | 1391 | 1213 | 17.5 | 25   | 4  | 5 | MED  | 20   | 0.52 | 35   | 0.57 | 1 |
| MPI-ESM-LR | 1976–2005 | 20   | −180   | 50   | −180   | −0.58 | 970  | 1253 | 1112 | 2.5  | 97.5 | 39 | 1 | PAC  | 25   | 0.59 | 35   | 0.63 | 1 |
| MPI-ESM-LR | 1976–2005 | 25   | −32.5  | 55   | −25    | −0.37 | 0    | 323  | 161  | 20   | 25   | 3  | 4 | ATL  | 25   | 0.59 | 35   | 0.63 | 1 |
| MPI-ESM-LR | 1976–2005 | 42.5 | 100    | 62.5 | 55     | −0.43 | 0    | 385  | 192  | 10   | 57.5 | 20 | 2 | ASIA | 25   | 0.59 | 35   | 0.63 | 1 |
| MPI-ESM-LR | 1976–2005 | 25   | 27.5   | 40   | 2.5    | −0.36 | 377  | 515  | 446  | 22.5 | 25   | 2  | 5 | MED  | 25   | 0.59 | 35   | 0.63 | 1 |
| MPI-ESM-MR | 1951–1980 | 20   | −180   | 52.5 | −177.5 | −0.57 | 278  | 584  | 431  | 2.5  | 97.5 | 39 | 1 | PAC  | 32.5 | 0.52 | 25   | 0.52 | 1 |
| MPI-ESM-MR | 1951–1980 | 25   | −50    | 52.5 | −35    | −0.38 | 1551 | 445  | 998  | 17.5 | 22.5 | 3  | 5 | ATL  | 32.5 | 0.52 | 25   | 0.52 | 3 |
| MPI-ESM-MR | 1951–1980 | 45   | 107.5  | 67.5 | 67.5   | −0.39 | 663  | 568  | 616  | 17.5 | 37.5 | 9  | 2 | ASIA | 32.5 | 0.52 | 25   | 0.52 | 1 |
| MPI-ESM-MR | 1951–1980 | 25   | 35     | 37.5 | 10     | −0.34 | 812  | 441  | 627  | 30   | 37.5 | 4  | 3 | MED  | 32.5 | 0.52 | 25   | 0.52 | 1 |
| MPI-ESM-MR | 1956–1985 | 20   | −177.5 | 52.5 | −177.5 | −0.58 | 383  | 661  | 522  | 2.5  | 97.5 | 39 | 1 | PAC  | 30   | 0.54 | 30   | 0.54 | 1 |
| MPI-ESM-MR | 1956–1985 | 25   | −62.5  | 52.5 | −37.5  | −0.38 | 2808 | 591  | 1699 | 20   | 22.5 | 2  | 4 | ATL  | 30   | 0.54 | 30   | 0.54 | 3 |
| MPI-ESM-MR | 1956–1985 | 45   | 105    | 65   | 57.5   | −0.41 | 488  | 371  | 430  | 12.5 | 47.5 | 15 | 2 | ASIA | 30   | 0.54 | 30   | 0.54 | 1 |
| MPI-ESM-MR | 1956–1985 | 25   | 35     | 40   | 10     | −0.34 | 812  | 515  | 664  | 30   | 32.5 | 2  | 5 | MED  | 30   | 0.54 | 30   | 0.54 | 1 |
| MPI-ESM-MR | 1961–1990 | 20   | −180   | 52.5 | −177.5 | −0.60 | 383  | 772  | 577  | 2.5  | 97.5 | 39 | 1 | PAC  | 15   | 0.50 | 42.5 | 0.55 | 1 |
| MPI-ESM-MR | 1961–1990 | 22.5 | −42.5  | 50   | −40    | −0.39 | 770  | 892  | 831  | 20   | 25   | 3  | 4 | ATL  | 15   | 0.50 | 42.5 | 0.55 | 3 |
| MPI-ESM-MR | 1961–1990 | 45   | 105    | 65   | 57.5   | −0.44 | 393  | 304  | 348  | 10   | 55   | 19 | 2 | ASIA | 15   | 0.50 | 42.5 | 0.55 | 1 |
| MPI-ESM-MR | 1961–1990 | 27.5 | 30     | 45   | 2.5    | −0.36 | 493  | 828  | 661  | 27.5 | 30   | 2  | 5 | MED  | 15   | 0.50 | 42.5 | 0.55 | 3 |
| MPI-ESM-MR | 1966–1995 | 20   | 175    | 52.5 | 177.5  | −0.60 | 837  | 904  | 871  | 2.5  | 97.5 | 39 | 1 | PAC  | 17.5 | 0.44 | 45   | 0.53 | 1 |
| MPI-ESM-MR | 1966–1995 | 27.5 | −47.5  | 55   | −27.5  | −0.38 | 1277 | 323  | 800  | 20   | 20   | 1  | 6 | ATL  | 17.5 | 0.44 | 45   | 0.53 | 3 |
| MPI-ESM-MR | 1966–1995 | 45   | 102.5  | 65   | 57.5   | −0.43 | 343  | 570  | 457  | 10   | 57.5 | 20 | 2 | ASIA | 17.5 | 0.44 | 45   | 0.53 | 1 |
| MPI-ESM-MR | 1966–1995 | 27.5 | 30     | 42.5 | 2.5    | −0.39 | 571  | 880  | 726  | 17.5 | 20   | 2  | 5 | MED  | 17.5 | 0.44 | 45   | 0.53 | 1 |

|            |           |      |       |      |        |       |      |      |      |      |      |    |   |      |      |      |      |      |   |
|------------|-----------|------|-------|------|--------|-------|------|------|------|------|------|----|---|------|------|------|------|------|---|
| MPI-ESM-MR | 1971–2000 | 20   | 177.5 | 52.5 | −180   | −0.59 | 837  | 904  | 871  | 2.5  | 97.5 | 39 | 1 | PAC  | 22.5 | 0.54 | 32.5 | 0.56 | 1 |
| MPI-ESM-MR | 1971–2000 | 27.5 | −40   | 57.5 | −32.5  | −0.42 | 798  | 845  | 821  | 12.5 | 25   | 6  | 4 | ATL  | 22.5 | 0.54 | 32.5 | 0.56 | 1 |
| MPI-ESM-MR | 1971–2000 | 45   | 105   | 65   | 60     | −0.43 | 488  | 556  | 522  | 10   | 52.5 | 18 | 2 | ASIA | 22.5 | 0.54 | 32.5 | 0.56 | 1 |
| MPI-ESM-MR | 1971–2000 | 27.5 | 30    | 42.5 | 2.5    | −0.40 | 798  | 1199 | 999  | 15   | 22.5 | 4  | 5 | MED  | 22.5 | 0.54 | 32.5 | 0.56 | 1 |
| MPI-ESM-MR | 1976–2005 | 20   | 177.5 | 52.5 | 177.5  | −0.60 | 1197 | 1524 | 1360 | 2.5  | 97.5 | 39 | 1 | PAC  | 20   | 0.42 | 35   | 0.52 | 1 |
| MPI-ESM-MR | 1976–2005 | 27.5 | −42.5 | 57.5 | −32.5  | −0.41 | 1035 | 845  | 940  | 15   | 20   | 3  | 5 | ATL  | 20   | 0.42 | 35   | 0.52 | 1 |
| MPI-ESM-MR | 1976–2005 | 45   | 102.5 | 65   | 57.5   | −0.41 | 343  | 371  | 357  | 15   | 60   | 19 | 2 | ASIA | 20   | 0.42 | 35   | 0.52 | 1 |
| MPI-ESM-MR | 1976–2005 | 30   | 32.5  | 45   | 2.5    | −0.42 | 870  | 932  | 901  | 12.5 | 27.5 | 7  | 4 | MED  | 20   | 0.42 | 35   | 0.52 | 1 |
| MPI-ESM-P  | 1951–1980 | 17.5 | −180  | 47.5 | −177.5 | −0.61 | 0    | 188  | 94   | 2.5  | 97.5 | 39 | 1 | PAC  | 27.5 | 0.53 | 10   | 0.56 | 1 |
| MPI-ESM-P  | 1951–1980 | 42.5 | 102.5 | 67.5 | 60     | −0.40 | 205  | 603  | 404  | 12.5 | 45   | 14 | 2 | ASIA | 27.5 | 0.53 | 10   | 0.56 | 1 |
| MPI-ESM-P  | 1951–1980 | 27.5 | 37.5  | 37.5 | 10     | −0.35 | 1150 | 441  | 796  | 27.5 | 30   | 2  | 8 | MED  | 27.5 | 0.53 | 10   | 0.56 | 1 |
| MPI-ESM-P  | 1951–1980 | 35   | −52.5 | 57.5 | −77.5  | −0.37 | 2194 | 3161 | 2678 | 20   | 27.5 | 4  | 4 | ATL  | 27.5 | 0.53 | 10   | 0.56 | 2 |
| MPI-ESM-P  | 1956–1985 | 17.5 | −180  | 47.5 | −177.5 | −0.59 | 0    | 376  | 188  | 2.5  | 97.5 | 39 | 1 | PAC  | 25   | 0.55 | 15   | 0.57 | 1 |
| MPI-ESM-P  | 1956–1985 | 42.5 | 100   | 65   | 57.5   | −0.42 | 0    | 371  | 185  | 12.5 | 47.5 | 15 | 2 | ASIA | 25   | 0.55 | 15   | 0.57 | 1 |
| MPI-ESM-P  | 1956–1985 | 25   | 35    | 37.5 | 10     | −0.36 | 812  | 441  | 627  | 25   | 25   | 1  | 7 | MED  | 25   | 0.55 | 15   | 0.57 | 1 |
| MPI-ESM-P  | 1956–1985 | 32.5 | −50   | 57.5 | −70    | −0.39 | 1847 | 2714 | 2281 | 15   | 25   | 5  | 3 | ATL  | 25   | 0.55 | 15   | 0.57 | 2 |
| MPI-ESM-P  | 1961–1990 | 17.5 | −180  | 47.5 | −177.5 | −0.60 | 265  | 563  | 414  | 2.5  | 97.5 | 39 | 1 | PAC  | 30   | 0.59 | 42.5 | 0.61 | 1 |
| MPI-ESM-P  | 1961–1990 | 35   | −35   | 65   | −50    | −0.43 | 1390 | 2118 | 1754 | 10   | 30   | 9  | 3 | ATL  | 30   | 0.59 | 42.5 | 0.61 | 1 |
| MPI-ESM-P  | 1961–1990 | 42.5 | 102.5 | 65   | 60     | −0.42 | 343  | 278  | 310  | 15   | 47.5 | 14 | 2 | ASIA | 30   | 0.59 | 42.5 | 0.61 | 1 |
| MPI-ESM-P  | 1961–1990 | 25   | 35    | 37.5 | 10     | −0.37 | 278  | 278  | 278  | 25   | 32.5 | 4  | 4 | MED  | 30   | 0.59 | 42.5 | 0.61 | 1 |
| MPI-ESM-P  | 1966–1995 | 17.5 | −180  | 50   | −177.5 | −0.63 | 265  | 460  | 363  | 2.5  | 97.5 | 39 | 1 | PAC  | 35   | 0.52 | 42.5 | 0.55 | 1 |
| MPI-ESM-P  | 1966–1995 | 37.5 | −27.5 | 67.5 | −45    | −0.41 | 1561 | 1985 | 1773 | 15   | 35   | 9  | 3 | ATL  | 35   | 0.52 | 42.5 | 0.55 | 1 |
| MPI-ESM-P  | 1966–1995 | 42.5 | 102.5 | 65   | 60     | −0.42 | 205  | 556  | 380  | 15   | 52.5 | 16 | 2 | ASIA | 35   | 0.52 | 42.5 | 0.55 | 1 |
| MPI-ESM-P  | 1966–1995 | 27.5 | 32.5  | 40   | 5      | −0.39 | 373  | 639  | 506  | 20   | 35   | 7  | 4 | MED  | 35   | 0.52 | 42.5 | 0.55 | 1 |
| MPI-ESM-P  | 1971–2000 | 20   | −180  | 50   | −180   | −0.60 | 595  | 783  | 689  | 2.5  | 97.5 | 39 | 1 | PAC  | 30   | 0.56 | 30   | 0.56 | 1 |
| MPI-ESM-P  | 1971–2000 | 25   | −32.5 | 52.5 | −25    | −0.42 | 0    | 169  | 85   | 15   | 37.5 | 10 | 3 | ATL  | 30   | 0.56 | 30   | 0.56 | 1 |
| MPI-ESM-P  | 1971–2000 | 42.5 | 102.5 | 65   | 60     | −0.41 | 205  | 556  | 380  | 17.5 | 52.5 | 15 | 2 | ASIA | 30   | 0.56 | 30   | 0.56 | 1 |
| MPI-ESM-P  | 1971–2000 | 27.5 | 30    | 40   | 2.5    | −0.41 | 798  | 1118 | 958  | 15   | 30   | 7  | 4 | MED  | 30   | 0.56 | 30   | 0.56 | 1 |
| MPI-ESM-P  | 1976–2005 | 17.5 | 177.5 | 50   | −177.5 | −0.60 | 1103 | 1089 | 1096 | 2.5  | 97.5 | 39 | 1 | PAC  | 25   | 0.51 | 40   | 0.53 | 1 |
| MPI-ESM-P  | 1976–2005 | 25   | −32.5 | 52.5 | −20    | −0.42 | 0    | 169  | 85   | 12.5 | 37.5 | 11 | 3 | ATL  | 25   | 0.51 | 40   | 0.53 | 1 |
| MPI-ESM-P  | 1976–2005 | 42.5 | 100   | 65   | 55     | −0.41 | 0    | 461  | 231  | 15   | 60   | 19 | 2 | ASIA | 25   | 0.51 | 40   | 0.53 | 1 |
| MPI-ESM-P  | 1976–2005 | 27.5 | 27.5  | 42.5 | 2.5    | −0.41 | 610  | 700  | 655  | 15   | 25   | 5  | 4 | MED  | 25   | 0.51 | 40   | 0.53 | 1 |



|           |           |      |        |      |        |       |      |      |      |      |      |    |   |      |      |      |      |      |   |
|-----------|-----------|------|--------|------|--------|-------|------|------|------|------|------|----|---|------|------|------|------|------|---|
| MRI-CGCM3 | 1951–1980 | 50   | 107.5  | 67.5 | 52.5   | −0.46 | 1013 | 806  | 909  | 7.5  | 40   | 14 | 2 | ASIA | 22.5 | 0.35 | 35   | 0.40 | 1 |
| MRI-CGCM3 | 1951–1980 | 25   | 50     | 35   | 25     | −0.44 | 2304 | 1811 | 2058 | 10   | 40   | 13 | 3 | MED  | 22.5 | 0.35 | 35   | 0.40 | 1 |
| MRI-CGCM3 | 1951–1980 | 17.5 | −140   | 47.5 | −142.5 | −0.62 | 4234 | 2423 | 3329 | 2.5  | 97.5 | 39 | 1 | PAC  | 22.5 | 0.35 | 35   | 0.40 | 1 |
| MRI-CGCM3 | 1951–1980 | 20   | −45    | 42.5 | −62.5  | −0.44 | 1073 | 2610 | 1842 | 10   | 25   | 7  | 4 | ATL  | 22.5 | 0.35 | 35   | 0.40 | 2 |
| MRI-CGCM3 | 1956–1985 | 17.5 | −142.5 | 47.5 | −145   | −0.62 | 3970 | 2055 | 3013 | 2.5  | 97.5 | 39 | 1 | PAC  | 20   | 0.41 | 37.5 | 0.47 | 1 |
| MRI-CGCM3 | 1956–1985 | 47.5 | 107.5  | 67.5 | 55     | −0.46 | 810  | 657  | 734  | 7.5  | 42.5 | 15 | 3 | ASIA | 20   | 0.41 | 37.5 | 0.47 | 1 |
| MRI-CGCM3 | 1956–1985 | 22.5 | 42.5   | 35   | 20     | −0.44 | 1540 | 1372 | 1456 | 10   | 62.5 | 22 | 2 | MED  | 20   | 0.41 | 37.5 | 0.47 | 1 |
| MRI-CGCM3 | 1956–1985 | 25   | −47.5  | 45   | −72.5  | −0.44 | 1302 | 3196 | 2249 | 10   | 20   | 5  | 4 | ATL  | 20   | 0.41 | 37.5 | 0.47 | 2 |
| MRI-CGCM3 | 1961–1990 | 17.5 | −140   | 47.5 | −142.5 | −0.59 | 3970 | 2055 | 3013 | 2.5  | 97.5 | 39 | 1 | PAC  | 20   | 0.42 | 32.5 | 0.43 | 1 |
| MRI-CGCM3 | 1961–1990 | 50   | 107.5  | 67.5 | 52.5   | −0.45 | 791  | 657  | 724  | 7.5  | 42.5 | 15 | 3 | ASIA | 20   | 0.42 | 32.5 | 0.43 | 1 |
| MRI-CGCM3 | 1961–1990 | 22.5 | 52.5   | 32.5 | 27.5   | −0.43 | 1847 | 1773 | 1810 | 10   | 47.5 | 16 | 2 | MED  | 20   | 0.42 | 32.5 | 0.43 | 1 |
| MRI-CGCM3 | 1961–1990 | 22.5 | −47.5  | 42.5 | −70    | −0.45 | 1284 | 3324 | 2304 | 7.5  | 27.5 | 9  | 4 | ATL  | 20   | 0.42 | 32.5 | 0.43 | 2 |
| MRI-CGCM3 | 1966–1995 | 17.5 | −142.5 | 47.5 | −145   | −0.58 | 3706 | 2055 | 2881 | 2.5  | 97.5 | 39 | 1 | PAC  | 30   | 0.47 | 30   | 0.47 | 1 |
| MRI-CGCM3 | 1966–1995 | 17.5 | −42.5  | 42.5 | −55    | −0.42 | 1139 | 2489 | 1814 | 10   | 30   | 9  | 4 | ATL  | 30   | 0.47 | 30   | 0.47 | 1 |
| MRI-CGCM3 | 1966–1995 | 47.5 | 110    | 70   | 55     | −0.41 | 962  | 1136 | 1049 | 12.5 | 52.5 | 17 | 3 | ASIA | 30   | 0.47 | 30   | 0.47 | 1 |
| MRI-CGCM3 | 1966–1995 | 22.5 | 50     | 32.5 | 27.5   | −0.42 | 1551 | 1579 | 1565 | 10   | 52.5 | 18 | 2 | MED  | 30   | 0.47 | 30   | 0.47 | 1 |
| MRI-CGCM3 | 1971–2000 | 17.5 | −145   | 50   | −147.5 | −0.59 | 3178 | 1666 | 2422 | 2.5  | 97.5 | 39 | 1 | PAC  | 20   | 0.40 | 20   | 0.40 | 1 |
| MRI-CGCM3 | 1971–2000 | 17.5 | −42.5  | 42.5 | −55    | −0.44 | 1329 | 2653 | 1991 | 7.5  | 27.5 | 9  | 4 | ATL  | 20   | 0.40 | 20   | 0.40 | 1 |
| MRI-CGCM3 | 1971–2000 | 50   | 107.5  | 70   | 47.5   | −0.42 | 1013 | 1252 | 1132 | 10   | 47.5 | 16 | 2 | ASIA | 20   | 0.40 | 20   | 0.40 | 1 |
| MRI-CGCM3 | 1971–2000 | 22.5 | 47.5   | 35   | 25     | −0.41 | 1055 | 938  | 997  | 12.5 | 50   | 16 | 3 | MED  | 20   | 0.40 | 20   | 0.40 | 1 |
| MRI-CGCM3 | 1976–2005 | 17.5 | −152.5 | 50   | −152.5 | −0.56 | 2152 | 1089 | 1621 | 2.5  | 97.5 | 39 | 1 | PAC  | 22.5 | 0.41 | 22.5 | 0.41 | 1 |
| MRI-CGCM3 | 1976–2005 | 17.5 | −42.5  | 42.5 | −55    | −0.47 | 1329 | 2653 | 1991 | 7.5  | 27.5 | 9  | 4 | ATL  | 22.5 | 0.41 | 22.5 | 0.41 | 1 |
| MRI-CGCM3 | 1976–2005 | 47.5 | 107.5  | 72.5 | 60     | −0.42 | 810  | 1117 | 963  | 12.5 | 52.5 | 17 | 2 | ASIA | 22.5 | 0.41 | 22.5 | 0.41 | 1 |
| MRI-CGCM3 | 1976–2005 | 22.5 | 45     | 35   | 22.5   | −0.42 | 1540 | 1372 | 1456 | 10   | 47.5 | 16 | 3 | MED  | 22.5 | 0.41 | 22.5 | 0.41 | 1 |
| MRI-ESM1  | 1951–1980 | 17.5 | −137.5 | 47.5 | −140   | −0.61 | 4497 | 2607 | 3552 | 2.5  | 97.5 | 39 | 1 | PAC  | 30   | 0.37 | 35   | 0.38 | 1 |
| MRI-ESM1  | 1951–1980 | 47.5 | 110    | 72.5 | 62.5   | −0.41 | 962  | 1117 | 1039 | 17.5 | 35   | 8  | 2 | ASIA | 30   | 0.37 | 35   | 0.38 | 1 |
| MRI-ESM1  | 1951–1980 | 25   | 42.5   | 35   | 17.5   | −0.38 | 1551 | 1154 | 1352 | 25   | 32.5 | 4  | 5 | MED  | 30   | 0.37 | 35   | 0.38 | 1 |
| MRI-ESM1  | 1951–1980 | 40   | −7.5   | 70   | 2.5    | −0.39 | 3236 | 2796 | 3016 | 22.5 | 30   | 4  | 4 | ATL  | 30   | 0.37 | 35   | 0.38 | 2 |
| MRI-ESM1  | 1956–1985 | 17.5 | −170   | 50   | −170   | −0.59 | 1060 | 333  | 697  | 2.5  | 97.5 | 39 | 1 | PAC  | 22.5 | 0.43 | 22.5 | 0.43 | 1 |
| MRI-ESM1  | 1956–1985 | 47.5 | 112.5  | 70   | 67.5   | −0.41 | 1127 | 863  | 995  | 15   | 40   | 11 | 2 | ASIA | 22.5 | 0.43 | 22.5 | 0.43 | 1 |
| MRI-ESM1  | 1956–1985 | 22.5 | 45     | 35   | 22.5   | −0.38 | 1797 | 1591 | 1694 | 22.5 | 37.5 | 7  | 4 | MED  | 22.5 | 0.43 | 22.5 | 0.43 | 1 |
| MRI-ESM1  | 1956–1985 | 40   | −7.5   | 70   | 2.5    | −0.39 | 3236 | 2796 | 3016 | 20   | 37.5 | 8  | 3 | ATL  | 22.5 | 0.43 | 22.5 | 0.43 | 2 |

|           |           |      |        |      |        |       |      |      |      |      |      |    |   |      |      |      |      |      |   |
|-----------|-----------|------|--------|------|--------|-------|------|------|------|------|------|----|---|------|------|------|------|------|---|
| MRI-ESM1  | 1961–1990 | 15   | –140   | 45   | –140   | –0.61 | 4007 | 2309 | 3158 | 2.5  | 97.5 | 39 | 1 | PAC  | 32.5 | 0.39 | 40   | 0.41 | 1 |
| MRI-ESM1  | 1961–1990 | 47.5 | 110    | 72.5 | 67.5   | –0.39 | 817  | 1155 | 986  | 20   | 50   | 13 | 2 | ASIA | 32.5 | 0.39 | 40   | 0.41 | 1 |
| MRI-ESM1  | 1961–1990 | 25   | 45     | 37.5 | 20     | –0.39 | 1035 | 910  | 972  | 20   | 45   | 11 | 3 | MED  | 32.5 | 0.39 | 40   | 0.41 | 1 |
| MRI-ESM1  | 1961–1990 | 37.5 | –12.5  | 67.5 | 0      | –0.37 | 2722 | 2468 | 2595 | 25   | 32.5 | 4  | 5 | ATL  | 32.5 | 0.39 | 40   | 0.41 | 2 |
| MRI-ESM1  | 1966–1995 | 17.5 | –162.5 | 50   | –165   | –0.62 | 1590 | 616  | 1103 | 2.5  | 97.5 | 39 | 1 | PAC  | 25   | 0.44 | 25   | 0.44 | 1 |
| MRI-ESM1  | 1966–1995 | 47.5 | 110    | 72.5 | 65     | –0.38 | 962  | 1407 | 1184 | 20   | 52.5 | 14 | 2 | ASIA | 25   | 0.44 | 25   | 0.44 | 1 |
| MRI-ESM1  | 1966–1995 | 37.5 | –12.5  | 67.5 | 2.5    | –0.38 | 2540 | 2226 | 2383 | 20   | 37.5 | 8  | 5 | ATL  | 25   | 0.44 | 25   | 0.44 | 2 |
| MRI-ESM1  | 1966–1995 | 27.5 | 70     | 45   | 50     | –0.37 | 3490 | 3096 | 3293 | 22.5 | 55   | 14 | 3 | MED  | 25   | 0.44 | 25   | 0.44 | 2 |
| MRI-ESM1  | 1971–2000 | 15   | –142.5 | 47.5 | –142.5 | –0.61 | 3476 | 2055 | 2766 | 2.5  | 97.5 | 39 | 1 | PAC  | 30   | 0.38 | 40   | 0.38 | 1 |
| MRI-ESM1  | 1971–2000 | 47.5 | 110    | 70   | 62.5   | –0.39 | 962  | 1118 | 1040 | 20   | 45   | 11 | 3 | ASIA | 30   | 0.38 | 40   | 0.38 | 1 |
| MRI-ESM1  | 1971–2000 | 37.5 | –12.5  | 62.5 | 15     | –0.37 | 2347 | 2454 | 2400 | 25   | 30   | 3  | 5 | ATL  | 30   | 0.38 | 40   | 0.38 | 2 |
| MRI-ESM1  | 1971–2000 | 27.5 | 70     | 45   | 50     | –0.36 | 3244 | 3016 | 3130 | 25   | 60   | 15 | 2 | MED  | 30   | 0.38 | 40   | 0.38 | 2 |
| MRI-ESM1  | 1976–2005 | 17.5 | –165   | 50   | –167.5 | –0.61 | 847  | 587  | 717  | 2.5  | 97.5 | 39 | 1 | PAC  | 30   | 0.42 | 37.5 | 0.43 | 1 |
| MRI-ESM1  | 1976–2005 | 25   | –30    | 50   | –12.5  | –0.36 | 252  | 749  | 500  | 27.5 | 30   | 2  | 8 | ATL  | 30   | 0.42 | 37.5 | 0.43 | 1 |
| MRI-ESM1  | 1976–2005 | 47.5 | 110    | 72.5 | 65     | –0.40 | 962  | 1117 | 1039 | 15   | 45   | 13 | 2 | ASIA | 30   | 0.42 | 37.5 | 0.43 | 1 |
| MRI-ESM1  | 1976–2005 | 27.5 | 70     | 45   | 50     | –0.39 | 4052 | 3606 | 3829 | 17.5 | 42.5 | 11 | 3 | MED  | 30   | 0.42 | 37.5 | 0.43 | 2 |
| NorESM1-M | 1951–1980 | 17.5 | –177.5 | 47.5 | –175   | –0.71 | 265  | 0    | 133  | 2.5  | 97.5 | 39 | 1 | PAC  | 55   | 0.26 | 7.5  | 0.49 | 1 |
| NorESM1-M | 1951–1980 | 45   | 97.5   | 62.5 | 52.5   | –0.41 | 343  | 641  | 492  | 27.5 | 40   | 6  | 3 | ASIA | 55   | 0.26 | 7.5  | 0.49 | 3 |
| NorESM1-M | 1951–1980 | 45   | –10    | 70   | –35    | –0.37 | 3378 | 2239 | 2809 | 45   | 60   | 7  | 2 | ATL  | 55   | 0.26 | 7.5  | 0.49 | 1 |
| NorESM1-M | 1951–1980 | 22.5 | 47.5   | 40   | 27.5   | –0.38 | 2053 | 1966 | 2009 | 42.5 | 50   | 4  | 5 | MED  | 55   | 0.26 | 7.5  | 0.49 | 3 |
| NorESM1-M | 1956–1985 | 17.5 | –177.5 | 47.5 | –175   | –0.73 | 265  | 188  | 226  | 2.5  | 97.5 | 39 | 1 | PAC  | 37.5 | 0.35 | 10   | 0.57 | 1 |
| NorESM1-M | 1956–1985 | 47.5 | 95     | 67.5 | 50     | –0.43 | 681  | 806  | 743  | 22.5 | 42.5 | 9  | 3 | ASIA | 37.5 | 0.35 | 10   | 0.57 | 1 |
| NorESM1-M | 1956–1985 | 45   | –7.5   | 70   | –32.5  | –0.40 | 3534 | 2228 | 2881 | 32.5 | 65   | 14 | 2 | ATL  | 37.5 | 0.35 | 10   | 0.57 | 2 |
| NorESM1-M | 1956–1985 | 22.5 | 47.5   | 40   | 27.5   | –0.38 | 2053 | 1966 | 2009 | 37.5 | 45   | 4  | 4 | MED  | 37.5 | 0.35 | 10   | 0.57 | 2 |
| NorESM1-M | 1961–1990 | 17.5 | –177.5 | 50   | –175   | –0.73 | 0    | 460  | 230  | 2.5  | 97.5 | 39 | 1 | PAC  | 40   | 0.37 | 17.5 | 0.48 | 1 |
| NorESM1-M | 1961–1990 | 45   | 95     | 62.5 | 50     | –0.43 | 393  | 513  | 453  | 25   | 47.5 | 10 | 2 | ASIA | 40   | 0.37 | 17.5 | 0.48 | 1 |
| NorESM1-M | 1961–1990 | 22.5 | 47.5   | 40   | 27.5   | –0.40 | 1376 | 1488 | 1432 | 37.5 | 55   | 8  | 4 | MED  | 40   | 0.37 | 17.5 | 0.48 | 1 |
| NorESM1-M | 1961–1990 | 45   | –7.5   | 70   | –32.5  | –0.41 | 3534 | 2239 | 2887 | 30   | 47.5 | 8  | 3 | ATL  | 40   | 0.37 | 17.5 | 0.48 | 2 |
| NorESM1-M | 1966–1995 | 17.5 | –175   | 47.5 | –172.5 | –0.73 | 265  | 0    | 133  | 2.5  | 97.5 | 39 | 1 | PAC  | 50   | 0.31 | 17.5 | 0.52 | 1 |
| NorESM1-M | 1966–1995 | 42.5 | –12.5  | 70   | –30    | –0.40 | 2832 | 1963 | 2397 | 37.5 | 55   | 8  | 3 | ATL  | 50   | 0.31 | 17.5 | 0.52 | 1 |
| NorESM1-M | 1966–1995 | 47.5 | 97.5   | 67.5 | 52.5   | –0.45 | 590  | 910  | 750  | 20   | 55   | 15 | 2 | ASIA | 50   | 0.31 | 17.5 | 0.52 | 1 |
| NorESM1-M | 1966–1995 | 22.5 | 47.5   | 40   | 27.5   | –0.37 | 1302 | 1276 | 1289 | 50   | 60   | 5  | 4 | MED  | 50   | 0.31 | 17.5 | 0.52 | 1 |

|           |           |      |        |      |        |       |      |      |      |      |      |    |   |      |      |      |    |      |   |
|-----------|-----------|------|--------|------|--------|-------|------|------|------|------|------|----|---|------|------|------|----|------|---|
| NorESM1-M | 1971–2000 | 17.5 | –175   | 47.5 | –172.5 | –0.72 | 0    | 188  | 94   | 2.5  | 97.5 | 39 | 1 | PAC  | 27.5 | 0.42 | 10 | 0.54 | 1 |
| NorESM1-M | 1971–2000 | 47.5 | 100    | 70   | 55     | –0.46 | 556  | 1136 | 846  | 17.5 | 40   | 10 | 3 | ASIA | 27.5 | 0.42 | 10 | 0.54 | 1 |
| NorESM1-M | 1971–2000 | 25   | 37.5   | 40   | 15     | –0.35 | 0    | 278  | 139  | 65   | 65   | 1  | 7 | MED  | 27.5 | 0.42 | 10 | 0.54 | 3 |
| NorESM1-M | 1971–2000 | 42.5 | –10    | 70   | –30    | –0.42 | 2832 | 1983 | 2407 | 27.5 | 55   | 12 | 2 | ATL  | 27.5 | 0.42 | 10 | 0.54 | 2 |
| NorESM1-M | 1976–2005 | 47.5 | 100    | 70   | 57.5   | –0.46 | 556  | 863  | 709  | 17.5 | 35   | 8  | 3 | ASIA | 20   | 0.50 | 20 | 0.50 | 1 |
| NorESM1-M | 1976–2005 | 17.5 | –172.5 | 47.5 | –172.5 | –0.71 | 278  | 640  | 459  | 2.5  | 97.5 | 39 | 1 | PAC  | 20   | 0.50 | 20 | 0.50 | 1 |
| NorESM1-M | 1976–2005 | 42.5 | –7.5   | 70   | –27.5  | –0.45 | 3001 | 1963 | 2482 | 20   | 50   | 13 | 2 | ATL  | 20   | 0.50 | 20 | 0.50 | 2 |
| NorESM1-M | 1976–2005 | 22.5 | 47.5   | 37.5 | 27.5   | –0.37 | 1797 | 1761 | 1779 | 45   | 52.5 | 4  | 5 | MED  | 20   | 0.50 | 20 | 0.50 | 3 |

---

**Table S7.** Examination of the corresponding clusters. The numbers 1, 2, and 3 denote the types of the clusters in accordance with Section 3.3.1. These data are extracted from the last column of Table S6. Table 3 in Section 3.3.1 is created based on Table S7. Example 1: number 2 corresponds to the case of the CMCC-CM (1951-1980) in Table 3 because the cluster MED obtained from the GCM (which corresponds to the reference cluster MED) is the most frequently observable cluster but not the nearest to the reference cluster MED. Example 2: number 3 corresponds to the case of the GFDL-ESM2G (1951-1980) in Table 3 because the cluster MED obtained from the GCM cannot be identified in the most similar CP map. In case of GFDL-CM3 in the period of 1951-1980 no cluster can be matched with the reference cluster MED so this cell is left blank.

| GCM/reanalysis | 1951–1980 |     |     |      | 1956–1985 |     |     |      | 1961–1990 |     |     |      | 1966–1995 |     |     |      | 1971–2000 |     |     |      | 1976–2005 |     |     |      |
|----------------|-----------|-----|-----|------|-----------|-----|-----|------|-----------|-----|-----|------|-----------|-----|-----|------|-----------|-----|-----|------|-----------|-----|-----|------|
|                | PAC       | ATL | MED | ASIA |
| NCEP/NCAR R1   | 1         | 1   | 1   | 1    | 1         | 3   | 1   | 1    | 1         | 1   | 1   | 1    | 1         | 1   | 1   | 1    | 1         | 1   | 1   | 1    | 1         | 1   | 1   | 1    |
| ACCESS1-0      | 1         | 2   | 1   | 1    | 1         | 1   | 2   | 1    | 1         | 2   | 1   | 1    | 1         | 2   | 2   | 1    | 1         | 2   | 2   | 1    | 1         | 2   | 2   | 1    |
| ACCESS1-3      | 1         | 1   | 1   | 1    | 1         | 2   | 1   | 1    | 1         | 2   | 2   | 1    | 1         | 1   | 1   | 1    | 1         | 2   | 1   | 1    | 1         | 2   | 1   | 1    |
| CCSM4          | 1         | 1   | 1   | 1    | 1         | 1   | 1   | 1    | 1         | 1   | 1   | 1    | 1         | 1   | 1   | 1    | 1         | 1   | 1   | 1    | 1         | 1   | 3   | 1    |
| CMCC-CM        | 1         | 1   | 2   | 1    | 1         | 1   | 2   | 1    | 1         | 1   | 2   | 1    | 1         | 1   | 1   | 1    | 1         | 1   | 1   | 1    | 1         | 1   | 1   | 1    |
| CMCC-CMS       | 1         | 1   | 1   | 1    | 1         | 1   | 2   | 1    | 1         | 1   | 1   | 1    | 1         | 1   | 1   | 1    | 1         | 1   | 1   | 1    | 1         | 1   | 1   | 1    |
| CNRM-CM5       | 1         | 1   | 1   | 1    | 1         | 1   | 1   | 1    | 1         | 1   | 1   | 1    | 1         | 1   | 1   | 1    | 1         | 1   | 1   | 1    | 1         | 1   | 1   | 1    |
| GFDL-CM3       | 1         | 1   |     | 1    | 1         | 3   | 3   | 1    | 1         | 2   | 1   | 1    | 1         | 3   | 3   | 1    | 1         | 3   | 3   | 1    | 1         | 3   | 3   | 1    |
| GFDL-ESM2G     | 1         | 2   | 3   | 1    | 1         | 2   | 3   | 1    | 1         | 2   | 3   | 1    | 1         | 1   | 3   | 1    | 1         | 2   | 1   | 1    | 1         | 2   | 1   | 1    |
| GFDL-ESM2M     | 1         | 1   | 1   | 1    | 1         | 1   | 3   | 1    | 1         | 2   | 1   | 1    | 1         | 1   | 1   | 1    | 1         | 1   | 2   | 1    | 1         | 1   | 1   | 1    |
| HadGEM2-AO     | 1         | 2   | 3   | 1    | 1         | 1   | 3   | 1    | 1         | 2   | 1   | 1    | 1         | 1   | 1   | 1    | 1         | 1   | 1   | 1    | 1         | 1   | 1   | 1    |
| HadGEM2-CC     | 1         | 1   | 1   | 1    | 1         | 1   | 2   | 1    | 1         | 1   | 1   | 1    | 1         | 2   | 1   | 1    | 1         | 2   | 1   | 1    | 1         | 2   | 1   | 1    |
| IPSL-CM5A-MR   | 1         | 1   | 2   | 1    | 1         | 1   | 2   | 1    | 1         | 1   | 2   | 1    | 1         | 1   | 1   | 1    | 1         | 1   | 1   | 1    | 1         | 1   | 1   | 1    |
| MIROC5         | 1         | 1   | 1   | 1    | 1         | 1   | 1   | 1    | 1         | 1   | 1   | 1    | 1         | 1   | 1   | 1    | 1         | 1   | 1   | 1    | 1         | 2   | 1   | 1    |
| MPI-ESM-LR     | 1         | 2   | 1   | 1    | 1         | 1   | 1   | 1    | 1         | 1   | 1   | 1    | 1         | 1   | 1   | 1    | 1         | 1   | 1   | 1    | 1         | 1   | 1   | 1    |
| MPI-ESM-MR     | 1         | 3   | 1   | 1    | 1         | 3   | 1   | 1    | 1         | 3   | 3   | 1    | 1         | 3   | 1   | 1    | 1         | 1   | 1   | 1    | 1         | 1   | 1   | 1    |
| MPI-ESM-P      | 1         | 2   | 1   | 1    | 1         | 2   | 1   | 1    | 1         | 1   | 1   | 1    | 1         | 1   | 1   | 1    | 1         | 1   | 1   | 1    | 1         | 1   | 1   | 1    |
| MRI-CGCM3      | 1         | 2   | 1   | 1    | 1         | 2   | 1   | 1    | 1         | 2   | 1   | 1    | 1         | 1   | 1   | 1    | 1         | 1   | 1   | 1    | 1         | 1   | 1   | 1    |
| MRI-ESM1       | 1         | 2   | 1   | 1    | 1         | 2   | 1   | 1    | 1         | 2   | 1   | 1    | 1         | 2   | 2   | 1    | 1         | 2   | 2   | 1    | 1         | 1   | 2   | 1    |
| NorESM1-M      | 1         | 1   | 3   | 3    | 1         | 2   | 2   | 1    | 1         | 2   | 1   | 1    | 1         | 1   | 1   | 1    | 1         | 2   | 3   | 1    | 1         | 2   | 3   | 1    |

**Table S8.** Summary table of the maximum values of the Matthews correlation coefficients ( $MCC_{max}$ ) and average distances (km). The  $MCC_{max}$  values are associated with the most similar CP maps obtained from the NCEP/NCAR R1 and the CMIP5 GCMs. Data were taken from Table S6. Average distances are calculated based on the two action centers of the clusters over the North Pacific Ocean (PAC), over the North Atlantic Ocean (ATL), in the regions of the Mediterranean Sea, the Red Sea, and North Africa (MED) and over the region of the West Siberian Plain and the Gobi Desert (ASIA) in each time period. Averages are calculated based on Table S6.

| Matthews correlation coefficients ( $MCC_{max}$ ) |               |               |               |               |               |               |             | Average distances [km] |               |               |               |               |               |               |             |
|---------------------------------------------------|---------------|---------------|---------------|---------------|---------------|---------------|-------------|------------------------|---------------|---------------|---------------|---------------|---------------|---------------|-------------|
| GCM/reanalysis<br>name                            | 1951–<br>1980 | 1956–<br>1985 | 1961–<br>1990 | 1966–<br>1995 | 1971–<br>2000 | 1976–<br>2005 | Average     | GCM/reanalysis<br>name | 1951–<br>1980 | 1956–<br>1985 | 1961–<br>1990 | 1966–<br>1995 | 1971–<br>2000 | 1976–<br>2005 | Average     |
| NCEP/NCAR R1                                      | 0.83          | 0.77          | 0.81          | 0.87          | 0.85          | 0.90          | <b>0.84</b> | NCEP/NCAR R1           | 353           | 363           | 208           | 81            | 41            | 183           | <b>205</b>  |
| ACCESS1-0                                         | 0.60          | 0.61          | 0.65          | 0.62          | 0.49          | 0.54          | <b>0.58</b> | ACCESS1-0              | 1118          | 1447          | 1437          | 1504          | 1436          | 1480          | <b>1404</b> |
| ACCESS1-3                                         | 0.49          | 0.53          | 0.56          | 0.55          | 0.52          | 0.55          | <b>0.53</b> | ACCESS1-3              | 909           | 898           | 1369          | 1311          | 1213          | 1966          | <b>1278</b> |
| CCSM4                                             | 0.46          | 0.45          | 0.38          | 0.42          | 0.37          | 0.41          | <b>0.41</b> | CCSM4                  | 1040          | 1041          | 899           | 874           | 1013          | 807           | <b>946</b>  |
| CMCC-CM                                           | 0.53          | 0.61          | 0.61          | 0.69          | 0.62          | 0.61          | <b>0.61</b> | CMCC-CM                | 1253          | 1059          | 1187          | 732           | 564           | 925           | <b>953</b>  |
| CMCC-CMS                                          | 0.64          | 0.58          | 0.57          | 0.57          | 0.58          | 0.56          | <b>0.58</b> | CMCC-CMS               | 805           | 1260          | 913           | 285           | 495           | 899           | <b>776</b>  |
| CNRM-CM5                                          | 0.49          | 0.52          | 0.61          | 0.57          | 0.52          | 0.49          | <b>0.54</b> | CNRM-CM5               | 1073          | 1066          | 702           | 732           | 770           | 1021          | <b>894</b>  |
| GFDL-CM3                                          | 0.38          | 0.48          | 0.51          | 0.55          | 0.49          | 0.52          | <b>0.49</b> | GFDL-CM3               | 1914          | 1667          | 1806          | 1802          | 1793          | 1242          | <b>1704</b> |
| GFDL-ESM2G                                        | 0.49          | 0.52          | 0.54          | 0.49          | 0.46          | 0.53          | <b>0.50</b> | GFDL-ESM2G             | 987           | 1172          | 1041          | 1086          | 1132          | 1007          | <b>1071</b> |
| GFDL-ESM2M                                        | 0.48          | 0.58          | 0.49          | 0.57          | 0.51          | 0.57          | <b>0.53</b> | GFDL-ESM2M             | 1328          | 1373          | 1756          | 1101          | 1090          | 913           | <b>1260</b> |
| HadGEM2-AO                                        | 0.32          | 0.34          | 0.43          | 0.39          | 0.43          | 0.54          | <b>0.41</b> | HadGEM2-AO             | 1875          | 1254          | 1627          | 1053          | 780           | 828           | <b>1236</b> |
| HadGEM2-CC                                        | 0.63          | 0.60          | 0.65          | 0.65          | 0.60          | 0.60          | <b>0.62</b> | HadGEM2-CC             | 693           | 815           | 1094          | 1119          | 1294          | 978           | <b>999</b>  |
| IPSL-CM5A-MR                                      | 0.47          | 0.50          | 0.53          | 0.46          | 0.55          | 0.52          | <b>0.51</b> | IPSL-CM5A-MR           | 1445          | 1564          | 1336          | 1154          | 1070          | 984           | <b>1259</b> |
| MIROC5                                            | 0.38          | 0.55          | 0.51          | 0.54          | 0.53          | 0.53          | <b>0.51</b> | MIROC5                 | 1434          | 1150          | 992           | 1068          | 1114          | 1254          | <b>1169</b> |
| MPI-ESM-LR                                        | 0.59          | 0.63          | 0.60          | 0.60          | 0.52          | 0.59          | <b>0.59</b> | MPI-ESM-LR             | 650           | 620           | 408           | 351           | 673           | 478           | <b>530</b>  |
| MPI-ESM-MR                                        | 0.52          | 0.54          | 0.50          | 0.44          | 0.54          | 0.42          | <b>0.50</b> | MPI-ESM-MR             | 668           | 829           | 604           | 713           | 803           | 890           | <b>751</b>  |
| MPI-ESM-P                                         | 0.53          | 0.55          | 0.59          | 0.52          | 0.56          | 0.51          | <b>0.54</b> | MPI-ESM-P              | 993           | 820           | 689           | 755           | 528           | 517           | <b>717</b>  |
| MRI-CGCM3                                         | 0.35          | 0.41          | 0.42          | 0.47          | 0.40          | 0.41          | <b>0.41</b> | MRI-CGCM3              | 2034          | 1863          | 1963          | 1827          | 1636          | 1508          | <b>1805</b> |
| MRI-ESM1                                          | 0.37          | 0.43          | 0.39          | 0.44          | 0.38          | 0.42          | <b>0.40</b> | MRI-ESM1               | 2240          | 1600          | 1928          | 1991          | 2334          | 1521          | <b>1936</b> |
| NorESM1-M                                         | 0.26          | 0.35          | 0.37          | 0.31          | 0.42          | 0.50          | <b>0.37</b> | NorESM1-M              | 1361          | 1465          | 1250          | 1142          | 872           | 1357          | <b>1241</b> |
| <b>GCM averages</b>                               | <b>0.47</b>   | <b>0.52</b>   | <b>0.52</b>   | <b>0.52</b>   | <b>0.5</b>    | <b>0.52</b>   |             | <b>GCM averages</b>    | <b>1254</b>   | <b>1208</b>   | <b>1211</b>   | <b>1084</b>   | <b>1085</b>   | <b>1083</b>   |             |
